# Supplementary material for: Genome-wide CRISPR screen identifies noncanonical NF-κB signaling as a regulator of density-dependent proliferation
Source: eLife. 2020 Nov 13;9:e63603. doi: 10.7554/eLife.63603 (PMC7685705; doi:10.7554/eLife.63603)
Supplement: Figure 1—figure supplement 1—source data 1. [file elife-63603-fig1-figsupp1-data1.xlsx]

## Sheet: F1S1_B
	Scrambled	p27 KD
Technical Repeat 1	1	0.449073
Technical Repeat 2	1	0.430486
Technical Repeat 3	1	0.41362

## Sheet: F1S1_D
	Before sorting	1st sorting	2nd sorting
Technical Repeat 1	1	1.79318	3.69429
Technical Repeat 2	1	1.80614	3.37782
Technical Repeat 3	1	1.44673	3.37311
