# Supplementary material for: Genome-wide CRISPR screen identifies noncanonical NF-κB signaling as a regulator of density-dependent proliferation
Source: eLife. 2020 Nov 13;9:e63603. doi: 10.7554/eLife.63603 (PMC7685705; doi:10.7554/eLife.63603)
Supplement: Figure 1—source data 1. [file elife-63603-fig1-data1.xlsx]

## Sheet: Figure_1_D
sgRNA	Gene	Before Sort	Sort 1	Sort 2	Sort 3
MGLibA_12206	Cst13	150.139	1310.32	603.08	238.37
MGLibA_00946	2610507B11Rik	19.8654	139.339	18.1105	18.8808
MGLibB_48215	Sh2b2	27.7034	21.4367	21.7326	14.1606
MGLibB_59542	Wnk1	1.21625	2.67959	5.43316	2.3601
MGLibA_42773	Prkd3	14.0544	13.398	14.4884	11.8005
MGLibA_46561	Rrp7a	34.1901	241.163	27.1658	28.3212
MGLibB_19584	Gbp8	39.7308	37.5143	47.0874	66.0828
MGLibB_51519	Ssxb9	12.9733	5.35919	12.6774	28.3212
MGLibB_47039	Sat2	5.67583	2.67959	9.05526	2.3601
MGLibB_50280	Snd1	72.8398	66.9898	67.0089	77.8833
MGLibA_39175	Oxgr1	8.91916	2.67959	3.6221	4.7202
MGLibB_28551	Lce1e	42.1633	8.03878	12.6774	18.8808
MGLibA_00307	1700013D24Rik	58.2448	120.582	72.4421	84.9636
MGLibA_01510	4932443I19Rik	3.91902	2.67959	0	4.7202
MGLibB_41451	Plekhh2	15.4058	72.349	25.3547	23.601
MGLibB_29233	Lpin1	77.9751	155.416	85.1195	115.645
MGLibA_41421	Plekha7	55.8123	40.1939	36.221	66.0828
MGLibA_23546	H2-M5	21.2168	16.0776	18.1105	9.4404
MGLibA_36442	Olfr1382	24.8655	24.1163	30.7879	47.202
MGLibA_58667	Vmn2r22	36.082	56.2715	25.3547	47.202
MGLibA_31444	Mlf2	42.0282	8.03878	5.43316	33.0414
MGLibB_27022	Kcnk15	43.785	351.027	21.7326	33.0414
MGLibB_09470	Cdh6	118.787	227.765	126.774	136.886
MGLibB_30069	Mageh1	1.08111	0	0	0
MGLibA_25127	Htr4	7.16235	29.4755	12.6774	4.7202
MGLibA_28744	Lemd3	27.4332	109.863	101.419	37.7616
MGLibB_52430	Sytl3	25.8115	10.7184	7.24421	11.8005
MGLibA_04731	Apol8	21.3519	16.0776	25.3547	23.601
MGLibB_56505	Ttll6	53.6501	66.9898	97.7968	115.645
MGLibB_60383	Zfp108	61.0827	32.1551	48.8984	59.0025
MGLibB_14793	Dpm3	8.51374	24.1163	19.9216	4.7202
MGLibA_48650	Ski	44.0552	26.7959	50.7095	4.7202
MGLibB_20667	Gm13769	48.3797	32.1551	16.2995	47.202
MGLibB_56695	Txndc11	2.97305	0	0	14.1606
MGLibA_55230	Tnni3	8.78402	5.35919	9.05526	2.3601
MGLibB_08110	Casp2	9.86513	8.03878	9.05526	14.1606
MGLibA_33873	Nfe2l3	100.273	155.416	153.939	101.484
MGLibB_20712	Gm14322	112.3	85.747	110.474	148.686
MGLibA_24399	Hist3h2a	28.3791	150.057	47.0874	110.925
MGLibB_32943	Myo1e	0.810833	0	5.43316	0
MGLibB_50295	Snn	22.5682	69.6694	61.5758	30.6813
MGLibA_64418	mmu-mir-129b	150.815	300.114	257.169	125.085
MGLibB_26582	Itpripl1	25.5412	142.018	12.6774	7.0803
MGLibA_23583	H2-T10	94.462	1452.34	921.826	389.417
MGLibA_21079	Gm2022	20.6762	13.398	27.1658	9.4404
MGLibA_05379	Asb12	101.895	868.188	1101.12	115.645
MGLibA_65561	mmu-mir-3102	109.327	1205.82	912.77	94.404
MGLibB_59441	Wfdc13	9.45971	5.35919	3.6221	0
MGLibB_46198	Rpl28	15.2707	18.7572	14.4884	9.4404
MGLibA_17677	Fam81a	14.595	18.7572	3.6221	21.2409
MGLibB_43280	Psapl1	40.947	45.5531	45.2763	25.9611
MGLibA_20836	Gm14692	71.8938	75.0286	97.7968	70.803
MGLibB_57363	Upk1a	16.0815	10.7184	19.9216	16.5207
MGLibA_38241	Olfr749	14.1896	18.7572	10.8663	4.7202
MGLibB_16648	Esrp2	3.51361	5.35919	0	7.0803
MGLibA_47097	Sbp	21.7573	158.096	184.727	1864.48
MGLibA_42365	Ppp1r3e	16.2167	13.398	21.7326	30.6813
MGLibA_46324	Rpp30	46.3526	29.4755	50.7095	35.4015
MGLibA_47155	Scara5	63.3801	53.5919	59.7647	73.1631
MGLibA_22769	Gpr75	21.0816	8.03878	23.5437	11.8005
MGLibB_43868	Purb	21.7573	13.398	5.43316	9.4404
MGLibA_28525	Lbr	73.2452	367.104	295.202	87.3237
MGLibB_58380	Vmn1r49	18.9194	10.7184	10.8663	23.601
MGLibB_23458	H1fnt	14.7301	13.398	10.8663	4.7202
MGLibB_05232	Armcx6	27.298	1200.46	671.9	11250.6
MGLibB_43667	Ptk6	9.72999	5.35919	1.81105	4.7202
MGLibB_14081	Dhrs7c	28.5143	21.4367	18.1105	30.6813
MGLibA_11702	Cpn1	41.4876	72.349	45.2763	37.7616
MGLibA_06948	Bloc1s5	35.1361	32.1551	43.4653	51.9222
MGLibA_10256	Chmp4b	33.7847	26.7959	14.4884	30.6813
MGLibA_26631	Izumo4	39.1902	53.5919	59.7647	66.0828
MGLibA_52359	Synm	45.2715	37.5143	34.41	9.4404
MGLibA_33676	Nedd4l	111.489	58.9511	61.5758	82.6035
MGLibA_47576	Sec31b	16.2167	50.9123	3.6221	25.9611
MGLibA_23788	Hbb-bt	19.3248	10.7184	10.8663	28.3212
MGLibA_08259	Cbx8	73.2452	13.398	18.1105	23.601
MGLibA_48143	Sfxn1	25.5412	2.67959	18.1105	33.0414
MGLibA_48803	Slc16a2	70.2722	246.523	152.128	94.404
MGLibB_62341	NonTargetingControlGuideForMouse_0537	41.893	661.86	302.446	40.1217
MGLibB_41223	Pla2g2c	47.5688	29.4755	36.221	63.7227
MGLibA_00750	2300003K06Rik	1.89194	2.67959	1.81105	11.8005
MGLibB_33948	Ngly1	1.21625	0	0	0
MGLibA_48527	Sipa1l3	81.3535	75.0286	90.5526	84.9636
MGLibA_61673	Znrf3	13.3787	5.35919	12.6774	9.4404
MGLibB_02359	Abcc9	60.2719	56.2715	68.82	63.7227
MGLibA_25929	Il9r	79.4616	618.986	470.874	70.803
MGLibB_44456	Ranbp17	18.6491	16.0776	9.05526	14.1606
MGLibB_07769	Calb2	70.4073	3065.45	2155.15	8142.35
MGLibA_00476	1700034O15Rik	30.6765	584.151	19.9216	7.0803
MGLibB_04322	Ankrd55	57.434	99.1449	43.4653	40.1217
MGLibB_11578	Cox20	62.5692	66.9898	52.5205	87.3237
MGLibA_17380	Fam195a	78.2453	61.6306	90.5526	96.7642
MGLibB_36309	Olfr1335	68.3802	109.863	83.3084	120.365
MGLibA_00303	1700012P22Rik	16.0815	10.7184	10.8663	16.5207
MGLibA_43421	Psmb8	59.3259	37.5143	56.1426	115.645
MGLibA_47695	Sema5a	22.433	115.223	45.2763	21.2409
MGLibA_59193	Wbp1	101.895	235.804	150.317	205.329
MGLibA_29689	Lst1	123.517	109.863	110.474	207.689
MGLibA_15879	Eif4enif1	91.6241	1007.53	1016	391.777
MGLibA_25455	Ifnb1	17.8383	16.0776	18.1105	16.5207
MGLibA_39163	Oxa1l	25.4061	13.398	19.9216	18.8808
MGLibB_46059	Rorb	23.1087	18.7572	14.4884	23.601
MGLibA_54047	Tlr6	26.0818	8.03878	16.2995	30.6813
MGLibA_53986	Tldc1	82.0292	391.221	54.3316	70.803
MGLibA_32361	Mst1r	38.3794	21.4367	38.0321	28.3212
MGLibB_45268	Rgn	16.4869	2.67959	3.6221	4.7202
MGLibB_00901	2510039O18Rik	53.7852	29.4755	54.3316	54.2823
MGLibB_05137	Arl2	6.21638	5.35919	5.43316	2.3601
MGLibB_46875	Saa3	5.40555	0	1.81105	9.4404
MGLibB_41191	Pkp3	26.4872	16.0776	47.0874	21.2409
MGLibA_21752	Gm5934	16.2167	8.03878	12.6774	7.0803
MGLibA_26533	Itgbl1	39.1902	53.5919	61.5758	35.4015
MGLibB_22712	Gpr39	5.54069	0	1.81105	4.7202
MGLibA_00564	1700101E01Rik	42.7038	385.861	79.6863	40.1217
MGLibB_37732	Olfr560	15.2707	5.35919	19.9216	7.0803
MGLibA_58981	Vps29	75.2723	48.2327	65.1979	59.0025
MGLibA_15662	Egfl6	84.8671	77.7082	132.207	87.3237
MGLibA_51669	Stard4	47.4337	42.8735	18.1105	14.1606
MGLibA_34127	Nkx2-2	14.0544	42.8735	9.05526	9.4404
MGLibB_14030	Dgkz	5.94611	5.35919	7.24421	0
MGLibB_15493	Edil3	26.0818	64.3102	21.7326	21.2409
MGLibB_62638	NonTargetingControlGuideForMouse_0834	178.383	1773.89	574.104	3596.79
MGLibA_43188	Prss29	115.679	648.462	304.257	4703.68
MGLibB_19300	Gabrr3	124.463	1197.78	1365.53	13884.5
MGLibA_61864	mmu-mir-6349	10.676	8.03878	7.24421	0
MGLibA_31783	Mplkip	15.4058	0	3.6221	23.601
MGLibB_61008	Zfp647	23.1087	503.764	431.03	49.5621
MGLibA_30172	Man2c1	82.2995	179.533	137.64	51.9222
MGLibB_22036	Gm8882	63.1098	53.5919	74.2531	40.1217
MGLibA_28187	Krtap27-1	57.9745	42.8735	39.8432	33.0414
MGLibA_23620	H2afy	1.62167	2.67959	1.81105	0
MGLibA_06128	B3galt4	19.8654	32.1551	25.3547	18.8808
MGLibB_03824	Alg11	7.43263	8.03878	7.24421	4.7202
MGLibA_13364	Dcaf15	71.8938	924.46	226.382	542.823
MGLibB_29137	Lnpep	10.676	2.67959	7.24421	4.7202
MGLibA_63630	mmu-mir-3082	78.3805	66.9898	72.4421	82.6035
MGLibB_58406	Vmn1r57	16.4869	117.902	9.05526	18.8808
MGLibA_44907	Rbx1	65.9477	53.5919	68.82	66.0828
MGLibA_26379	Isca2	76.894	66.9898	106.852	63.7227
MGLibA_32047	Mrpl32	19.7303	10.7184	7.24421	2.3601
MGLibB_51112	Sprr2e	20.2708	24.1163	18.1105	23.601
MGLibA_24282	Hist1h2bh	9.59485	5.35919	7.24421	0
MGLibA_46294	Rpl9	7.70291	10.7184	12.6774	2.3601
MGLibB_47775	Serp2	20.1357	13.398	25.3547	14.1606
MGLibB_38089	Olfr699	9.32457	2.67959	12.6774	14.1606
MGLibB_12703	Cyp17a1	39.0551	34.8347	41.6542	44.8419
MGLibA_65699	mmu-mir-7240	30.2711	18.7572	18.1105	14.1606
MGLibA_48064	Sf3a2	9.86513	0	0	0
MGLibA_12049	Cryl1	56.0826	321.551	325.989	18.8808
MGLibB_18316	Fgf1	23.379	13.398	23.5437	16.5207
MGLibA_13690	Decr1	7.02722	5.35919	3.6221	2.3601
MGLibB_16554	Erp44	35.5415	21.4367	19.9216	30.6813
MGLibA_66500	NonTargetingControlGuideForMouse_0095	73.1101	723.49	485.362	59.0025
MGLibB_35573	Olfr1043	16.7572	8.03878	9.05526	16.5207
MGLibA_50432	Snx1	50.0013	24.1163	43.4653	59.0025
MGLibB_51074	Sppl2b	16.3518	562.715	208.271	792.994
MGLibA_13517	Ddb1	1.62167	2.67959	0	0
MGLibA_59304	Wdr3	1.62167	0	0	2.3601
MGLibA_10046	Cfc1	48.7851	64.3102	70.631	37.7616
MGLibA_17105	Fam120b	155.139	155.416	162.995	186.448
MGLibA_01188	4930402F06Rik	65.272	192.931	59.7647	75.5232
MGLibA_59642	Wrn	14.7301	2.67959	9.05526	9.4404
MGLibA_62775	mmu-mir-370	36.082	372.463	450.952	1937.64
MGLibB_32284	Msh2	116.219	128.62	112.285	101.484
MGLibA_51439	Ssh1	51.3527	58.9511	68.82	68.4429
MGLibB_16904	F13a1	17.0275	21.4367	10.8663	4.7202
MGLibA_05469	Asic1	23.7844	10.7184	21.7326	21.2409
MGLibB_38101	Olfr701	23.6493	115.223	52.5205	56.6424
MGLibB_07190	Bri3	61.7584	160.776	57.9537	75.5232
MGLibA_09151	Cd37	117.436	195.61	92.3637	94.404
MGLibA_46675	Rtkn	94.1917	214.367	85.1195	96.7642
MGLibB_24584	Hnrnph3	1.62167	2.67959	0	9.4404
MGLibA_30073	Magee2	60.407	707.413	57.9537	51.9222
MGLibA_23211	Gstt1	48.65	45.5531	81.4974	40.1217
MGLibA_13916	Dennd4c	133.652	93.7858	166.617	134.526
MGLibB_10392	Chst1	10.4057	8.03878	12.6774	30.6813
MGLibA_43582	Ptchd4	20.9465	24.1163	23.5437	33.0414
MGLibB_06545	Barhl1	5.00013	5.35919	3.6221	9.4404
MGLibB_42032	Pou2f3	42.9741	29.4755	36.221	37.7616
MGLibB_28294	L2hgdh	7.29749	5.35919	3.6221	0
MGLibB_28197	Krtap4-13	10.9462	0	1.81105	4.7202
MGLibA_37846	Olfr603	96.3539	991.449	1006.95	738.712
MGLibA_57165	Ufd1l	32.2982	61.6306	41.6542	28.3212
MGLibA_35984	Olfr1214	35.4064	50.9123	34.41	18.8808
MGLibB_33475	Ndn	8.51374	5.35919	9.05526	7.0803
MGLibA_03442	Agpat9	29.19	32.1551	50.7095	28.3212
MGLibB_57444	Urod	13.649	5.35919	9.05526	7.0803
MGLibB_16207	Enpp6	18.9194	18.7572	30.7879	35.4015
MGLibB_30534	Mbd6	70.4073	200.969	184.727	790.634
MGLibB_52055	Sult2b1	5.81097	8.03878	5.43316	7.0803
MGLibA_16279	Epb4.1l4a	21.8925	13.398	27.1658	28.3212
MGLibA_30643	Mcl1	27.4332	2.67959	0	0
MGLibB_32276	Msantd4	18.2437	0	9.05526	2.3601
MGLibB_20973	Gm16442	67.2991	96.4654	39.8432	49.5621
MGLibB_14702	Dok2	10.8111	10.7184	21.7326	9.4404
MGLibB_01974	A530064D06Rik	7.70291	5.35919	9.05526	14.1606
MGLibB_46564	Rsad2	47.9743	5.35919	23.5437	51.9222
MGLibA_23944	Hebp2	71.7587	267.959	128.585	84.9636
MGLibB_57896	Vldlr	7.70291	2.67959	0	14.1606
MGLibB_61871	NonTargetingControlGuideForMouse_0067	165.68	265.28	237.248	158.127
MGLibA_49754	Slc8b1	81.2184	139.339	63.3868	63.7227
MGLibB_05219	Armcx1	142.301	522.521	630.246	575.865
MGLibA_10454	Cib4	58.3799	117.902	50.7095	37.7616
MGLibA_16093	Eml1	130.139	112.543	112.285	94.404
MGLibA_09051	Cd209a	46.0823	8.03878	28.9768	23.601
MGLibB_54964	Tmprss11g	31.3522	13.398	14.4884	44.8419
MGLibB_20389	Gm11487	93.2457	91.1062	92.3637	141.606
MGLibA_07316	Btd	7.97319	0	12.6774	14.1606
MGLibB_16496	Erg	13.9193	5.35919	18.1105	23.601
MGLibA_33726	Nek4	79.7319	32.1551	45.2763	82.6035
MGLibA_04255	Ankrd29	28.244	29.4755	16.2995	14.1606
MGLibA_08577	Ccdc54	126.084	999.488	266.225	830.756
MGLibB_61601	Zmym6	69.0559	104.504	45.2763	75.5232
MGLibB_44597	Rasgrf1	49.7311	908.382	938.125	66.0828
MGLibB_28336	LOC101055863	144.058	811.917	374.888	290.292
MGLibB_32923	Myo18a	22.8385	8.03878	9.05526	14.1606
MGLibB_57814	Vcp	7.43263	5.35919	7.24421	11.8005
MGLibA_06482	Bag3	42.839	18.7572	23.5437	30.6813
MGLibA_42145	Ppef2	20.5411	123.261	25.3547	40.1217
MGLibB_02977	Adam30	50.2716	56.2715	52.5205	56.6424
MGLibB_53874	Timm21	60.8124	273.319	76.0642	63.7227
MGLibA_50792	Spata2l	19.5951	243.843	199.216	18.8808
MGLibB_55664	Trf	10.9462	2.67959	3.6221	14.1606
MGLibB_45828	Rnf148	19.0546	8.03878	14.4884	18.8808
MGLibA_57690	Utp18	12.1625	21.4367	27.1658	23.601
MGLibB_25691	Il11ra2	102.976	142.018	105.041	122.725
MGLibB_60404	Zfp119a	34.4604	8.03878	3.6221	7.0803
MGLibB_05965	Atraid	31.3522	10.7184	16.2995	18.8808
MGLibA_62862	mmu-mir-381	0.675694	2.67959	0	0
MGLibB_18931	Frmd7	55.8123	16.0776	50.7095	75.5232
MGLibB_47057	Sbds	24.8655	8.03878	25.3547	37.7616
MGLibA_55897	Trim75	78.3805	45.5531	95.9858	63.7227
MGLibB_00601	1700129C05Rik	7.70291	2.67959	12.6774	4.7202
MGLibB_25643	Iigp1	8.91916	13.398	14.4884	21.2409
MGLibB_06854	Bhlha15	27.1629	21.4367	39.8432	21.2409
MGLibA_44280	Rabep2	37.974	369.784	302.446	42.4818
MGLibB_59930	Ythdf1	53.7852	29.4755	36.221	25.9611
MGLibA_59583	Wnt16	4.1893	2.67959	3.6221	9.4404
MGLibA_57440	Urad	67.5694	53.5919	18.1105	68.4429
MGLibA_06663	Bckdhb	91.7592	88.4266	105.041	75.5232
MGLibB_60414	Zfp120	0.540555	0	3.6221	0
MGLibA_50459	Snx30	0.135139	0	0	0
MGLibB_51822	Stmnd1	5.81097	5.35919	3.6221	0
MGLibA_46157	Rpl12	5.81097	0	0	2.3601
MGLibB_54274	Tmem126a	13.5139	18.7572	18.1105	18.8808
MGLibB_00586	1700122O11Rik	21.4871	26.7959	28.9768	35.4015
MGLibA_46496	Rqcd1	29.5954	45.5531	47.0874	21.2409
MGLibA_00881	2410127L17Rik	29.4603	136.659	36.221	14.1606
MGLibB_16605	Esp36	26.0818	26.7959	50.7095	44.8419
MGLibB_60951	Zfp608	22.2979	0	21.7326	18.8808
MGLibB_15141	Dvl3	127.03	605.588	541.505	422.458
MGLibA_64384	mmu-mir-130a	62.7044	278.678	61.5758	66.0828
MGLibB_11829	Crbn	9.0543	2.67959	7.24421	7.0803
MGLibA_37571	Olfr494	105.138	171.494	86.9305	89.6838
MGLibB_54837	Tmem69	27.1629	29.4755	45.2763	40.1217
MGLibA_62351	mmu-mir-6921	127.301	2135.64	2022.95	8859.82
MGLibA_34583	Nprl2	5.67583	0	3.6221	11.8005
MGLibA_10457	Cic	20.9465	13.398	0	4.7202
MGLibB_05611	Atf7ip	2.4325	2.67959	1.81105	0
MGLibA_62898	mmu-mir-154	16.7572	16.0776	34.41	28.3212
MGLibB_19718	Gdi1	6.89208	0	0	4.7202
MGLibA_37318	Olfr38	109.327	300.114	112.285	118.005
MGLibB_36956	Olfr224	17.1626	72.349	34.41	16.5207
MGLibB_08644	Ccdc77	89.0564	522.521	508.906	82.6035
MGLibA_56273	Tspan8	14.0544	10.7184	9.05526	7.0803
MGLibB_47552	Sec24b	6.75694	8.03878	5.43316	2.3601
MGLibA_35077	Nufip2	8.91916	0	7.24421	7.0803
MGLibB_60130	Zc2hc1c	57.2988	29.4755	59.7647	61.3626
MGLibB_15959	Ell3	3.37847	0	1.81105	0
MGLibA_09477	Cdh9	36.2172	13.398	14.4884	18.8808
MGLibA_51836	Stmnd1	24.1898	96.4654	16.2995	33.0414
MGLibB_04013	Amigo3	12.8382	8.03878	3.6221	7.0803
MGLibA_61989	mmu-mir-1843b	12.5679	0	7.24421	11.8005
MGLibB_14579	Dnal4	22.5682	21.4367	10.8663	4.7202
MGLibA_12238	Cstf2	12.1625	8.03878	9.05526	0
MGLibB_18421	Fhl5	27.9737	5.35919	14.4884	11.8005
MGLibA_49406	Slc38a11	55.2718	42.8735	59.7647	40.1217
MGLibB_14479	Dnajb6	12.1625	5.35919	9.05526	14.1606
MGLibB_49602	Slc5a4a	8.64888	13.398	14.4884	11.8005
MGLibB_42955	Prop1	36.6226	8.03878	18.1105	25.9611
MGLibB_05443	Ascl3	49.3256	21.4367	39.8432	40.1217
MGLibB_08901	Ccp110	36.082	16.0776	32.5989	25.9611
MGLibA_51670	Stard4	2.16222	5.35919	0	0
MGLibB_10951	Cmip	9.86513	2.67959	5.43316	18.8808
MGLibB_32466	Mthfr	71.6235	426.055	74.2531	80.2434
MGLibB_07483	C1rb	33.5144	45.5531	38.0321	37.7616
MGLibA_33105	Naa16	5.27041	5.35919	1.81105	4.7202
MGLibA_05603	Atf6b	0.810833	0	0	0
MGLibB_58704	Vmn2r3	35.9469	34.8347	34.41	30.6813
MGLibA_59272	Wdr25	17.1626	18.7572	19.9216	16.5207
MGLibB_06580	Baz2b	33.5144	166.135	25.3547	21.2409
MGLibB_22505	Gpn1	27.7034	34.8347	23.5437	21.2409
MGLibA_32378	Msx3	76.3534	83.0674	81.4974	92.0439
MGLibB_38860	Oog3	16.4869	16.0776	18.1105	28.3212
MGLibB_50837	Spats2	4.32444	1071.84	441.897	2.3601
MGLibB_21015	Gm17365	0.540555	0	0	0
MGLibB_34666	Nr2e1	73.9209	72.349	77.8752	120.365
MGLibA_56894	Ube2d2a	25.2709	211.688	23.5437	25.9611
MGLibB_00551	1700084C01Rik	40.1362	26.7959	41.6542	30.6813
MGLibA_48951	Slc22a29	20.2708	24.1163	18.1105	25.9611
MGLibB_09744	Cecr5	10.0003	5.35919	10.8663	21.2409
MGLibB_17809	Fastkd3	49.7311	37.5143	57.9537	33.0414
MGLibB_46802	S100a10	2.16222	131.3	0	0
MGLibB_54746	Tmem42	27.7034	227.765	21.7326	16.5207
MGLibA_31168	Mfsd4	179.735	211.688	52.5205	103.844
MGLibA_08549	Ccdc3	43.2444	262.6	197.405	311.533
MGLibB_52588	Taf4b	6.08124	8.03878	3.6221	0
MGLibA_29905	Lyst	9.45971	5.35919	3.6221	4.7202
MGLibA_54983	Tmprss12	29.19	58.9511	16.2995	9.4404
MGLibB_58340	Vmn1r37	102.3	439.453	124.963	125.085
MGLibB_45521	Rhox8	4.32444	230.445	175.672	0
MGLibB_40578	Pgm1	1.7568	0	0	0
MGLibB_08355	Ccdc126	22.7033	26.7959	18.1105	21.2409
MGLibA_44967	Rcsd1	29.4603	61.6306	23.5437	35.4015
MGLibB_19160	Fzd5	37.028	13.398	23.5437	28.3212
MGLibA_38392	Olfr818	11.4868	8.03878	9.05526	9.4404
MGLibB_12786	Cyp2c44	24.1898	21.4367	19.9216	14.1606
MGLibB_39572	Pask	47.4337	32.1551	43.4653	63.7227
MGLibB_29789	Ly6g6e	106.489	1187.06	249.925	844.916
MGLibA_26523	Itgb5	11.0814	5.35919	5.43316	9.4404
MGLibA_43031	Prpf6	60.9476	29.4755	74.2531	84.9636
MGLibA_64227	mmu-mir-466n	51.2176	66.9898	83.3084	66.0828
MGLibA_38073	Olfr68	69.4613	364.425	72.4421	108.565
MGLibB_33486	Ndrg2	7.70291	0	0	2.3601
MGLibA_02525	Acacb	36.6226	18.7572	27.1658	14.1606
MGLibA_44041	Qsox1	411.633	8287.98	1897.98	533.383
MGLibB_04832	Areg	21.6222	5.35919	14.4884	25.9611
MGLibB_52832	Tax1bp1	26.8926	4860.78	5395.12	22649.9
MGLibB_34828	Nsg2	0.135139	0	3.6221	4.7202
MGLibB_08257	Cbx7	17.568	2.67959	7.24421	23.601
MGLibB_31407	Mknk2	2.97305	2.67959	1.81105	0
MGLibB_48154	Sgce	58.5151	29.4755	52.5205	82.6035
MGLibA_64236	mmu-mir-466l	40.2714	56.2715	50.7095	82.6035
MGLibA_23157	Gss	17.2978	10.7184	14.4884	21.2409
MGLibB_33773	Neto2	4.45958	2.67959	1.81105	2.3601
MGLibB_57452	Usb1	2.97305	2.67959	5.43316	7.0803
MGLibB_29652	Lsm4	25.9466	21.4367	25.3547	40.1217
MGLibA_55335	Tomm7	214.735	246.523	233.626	228.93
MGLibA_30609	Mc5r	53.7852	75.0286	67.0089	54.2823
MGLibB_27829	Klrc1	14.7301	5.35919	7.24421	11.8005
MGLibA_22817	Gprc5d	69.5965	142.018	106.852	122.725
MGLibA_62355	mmu-mir-6922	79.5967	53.5919	77.8752	70.803
MGLibA_43447	Psmd10	28.244	34.8347	14.4884	7.0803
MGLibB_24412	Hjurp	15.541	32.1551	10.8663	4.7202
MGLibB_61004	Zfp646	52.7041	117.902	23.5437	40.1217
MGLibA_32207	Mrps6	79.0562	45.5531	72.4421	49.5621
MGLibA_05336	Artn	106.895	69.6694	23.5437	51.9222
MGLibB_21325	Gm3701	55.0015	171.494	106.852	59.0025
MGLibB_15605	Efhd1	3.78389	5.35919	0	9.4404
MGLibA_30028	Magea3	100.138	88.4266	137.64	113.285
MGLibA_39410	Pam	69.4613	755.645	67.0089	80.2434
MGLibA_35154	Nup93	48.65	21.4367	23.5437	37.7616
MGLibB_23317	Gtpbp8	60.407	176.853	54.3316	33.0414
MGLibA_65451	mmu-mir-5121	41.0822	66.9898	47.0874	87.3237
MGLibA_63742	mmu-mir-6420	9.59485	5.35919	3.6221	9.4404
MGLibB_17845	Fbll1	34.1901	29.4755	30.7879	49.5621
MGLibA_39586	Pate2	107.976	3242.31	3587.69	75424.1
MGLibB_46279	Rpl9	5.13527	2.67959	0	0
MGLibB_58395	Vmn1r53	17.9735	10.7184	21.7326	4.7202
MGLibB_04026	Amotl1	12.4328	10.7184	10.8663	23.601
MGLibA_10665	Cldn4	50.1365	5.35919	16.2995	33.0414
MGLibA_24182	Hip1r	66.8937	64.3102	68.82	94.404
MGLibB_16977	Fabp9	0.135139	0	0	0
MGLibB_56660	Twf1	41.6227	329.59	193.783	80.2434
MGLibB_32032	Mrpl2	30.6765	123.261	34.41	42.4818
MGLibB_26619	Izumo3	3.10819	2.67959	0	0
MGLibB_41061	Pira7	190.275	418.017	423.786	328.054
MGLibA_16121	Emr1	72.8398	948.576	791.43	1243.77
MGLibA_51014	Spink7	43.3795	42.8735	54.3316	30.6813
MGLibA_36774	Olfr1537	57.1637	3352.17	2593.43	2817.96
MGLibA_05752	Atp1b1	13.9193	0	7.24421	11.8005
MGLibA_17182	Fam13c	58.2448	2470.58	1926.96	939.32
MGLibB_12699	Cyp11b2	18.3789	8.03878	10.8663	25.9611
MGLibA_11696	Cplx4	45.4066	88.4266	70.631	49.5621
MGLibB_48241	Sh2d4b	38.7848	42.8735	54.3316	37.7616
MGLibA_55227	Tnni3k	12.5679	2.67959	3.6221	16.5207
MGLibA_40527	Pfpl	1.62167	8.03878	1.81105	0
MGLibB_34822	Nsf	6.6218	8.03878	7.24421	7.0803
MGLibB_14148	Diap2	11.6219	29.4755	28.9768	0
MGLibA_65374	mmu-mir-343	24.5953	10.7184	5.43316	16.5207
MGLibB_36600	Olfr1448	18.7843	2.67959	16.2995	18.8808
MGLibA_12133	Csnk1a1	2.83791	8.03878	3.6221	2.3601
MGLibB_52651	Tango2	29.3251	29.4755	54.3316	44.8419
MGLibB_60232	Zcchc6	57.9745	40.1939	101.419	84.9636
MGLibA_33471	Ndel1	56.6231	88.4266	48.8984	21.2409
MGLibA_32520	Mtmr4	38.2443	32.1551	25.3547	44.8419
MGLibA_21869	Gm6878	86.4888	200.969	121.341	132.166
MGLibA_60753	Zfp422	47.1634	37.5143	56.1426	35.4015
MGLibA_07187	Bri3bp	12.0273	2.67959	12.6774	7.0803
MGLibA_16525	Erlin1	38.5145	501.084	559.615	61.3626
MGLibA_60544	Zfp26	82.9752	115.223	134.018	56.6424
MGLibB_13247	Dalrd3	18.6491	29.4755	18.1105	2.3601
MGLibB_35252	Oard1	15.541	5.35919	14.4884	30.6813
MGLibB_24732	Hoxc9	7.56777	423.376	300.635	11.8005
MGLibA_16759	Evi5l	55.2718	935.178	1005.13	113.285
MGLibB_41443	Plekhg6	15.1355	5.35919	5.43316	16.5207
MGLibB_11370	Col6a6	50.4068	24.1163	27.1658	40.1217
MGLibA_12128	Csn2	29.19	26.7959	10.8663	21.2409
MGLibA_65476	mmu-mir-344d-3	156.626	385.861	157.562	193.528
MGLibA_06327	BC035044	17.0275	77.7082	10.8663	9.4404
MGLibB_16150	Endov	7.56777	549.317	436.464	1840.88
MGLibA_02653	Aco2	6.89208	8.03878	3.6221	2.3601
MGLibB_48383	Shisa5	6.35152	2.67959	7.24421	2.3601
MGLibA_11621	Cox7b	74.5966	64.3102	70.631	96.7642
MGLibB_36666	Olfr147	23.9196	21.4367	19.9216	16.5207
MGLibA_23156	Gss	3.64875	13.398	5.43316	0
MGLibB_01728	6430550D23Rik	0.810833	2.67959	0	0
MGLibA_54144	Tmc4	76.0831	107.184	54.3316	51.9222
MGLibB_22543	Gpr116	8.3786	2.67959	0	2.3601
MGLibA_21721	Gm5820	250.818	284.037	351.344	287.932
MGLibA_34202	Nlrp2	44.8661	16.0776	14.4884	25.9611
MGLibB_60210	Zcchc17	30.0008	26.7959	27.1658	37.7616
MGLibB_05388	Asb15	3.78389	0	1.81105	0
MGLibB_28672	Ldhb	12.9733	18.7572	16.2995	9.4404
MGLibB_29782	Ly6g6c	43.785	61.6306	39.8432	28.3212
MGLibA_18097	Fbxw2	40.1362	21.4367	23.5437	35.4015
MGLibA_25135	Htr6	2.83791	2.67959	1.81105	0
MGLibB_28907	Lif	28.244	120.582	21.7326	40.1217
MGLibA_65600	mmu-mir-7686	14.7301	13.398	7.24421	11.8005
MGLibB_10689	Clec11a	15.9464	5.35919	3.6221	11.8005
MGLibA_09538	Cdk2ap2	40.8119	3301.26	2722.01	23770.9
MGLibA_49713	Slc7a15	99.327	101.825	134.018	129.806
MGLibA_04783	Aqp1	57.0286	32.1551	45.2763	56.6424
MGLibB_00543	1700080E11Rik	22.0276	2.67959	3.6221	16.5207
MGLibA_57636	Usp4	16.3518	726.17	338.667	118.005
MGLibB_47605	Sel1l	15.0004	101.825	30.7879	16.5207
MGLibA_11436	Comp	95.2728	380.502	280.713	295.013
MGLibA_04788	Aqp3	30.9468	18.7572	32.5989	33.0414
MGLibA_25515	Ift57	64.7315	50.9123	67.0089	75.5232
MGLibA_48115	Sfrs18	26.4872	24.1163	28.9768	28.3212
MGLibB_01007	2810417H13Rik	37.2983	166.135	54.3316	623.067
MGLibB_22802	Gprc5b	5.94611	0	1.81105	0
MGLibB_28815	Lgals8	23.7844	1503.25	1150.02	363.456
MGLibA_04278	Ankrd35	59.4611	514.482	420.164	1283.9
MGLibA_51603	St8sia3	73.3803	21.4367	77.8752	73.1631
MGLibA_35089	Numb	8.91916	10.7184	7.24421	0
MGLibA_66088	mmu-mir-221	35.9469	10.7184	16.2995	14.1606
MGLibA_12645	Cyb5r3	84.732	88.4266	103.23	63.7227
MGLibB_45397	Rhobtb3	58.3799	211.688	244.492	1352.34
MGLibA_53058	Tcaim	23.2439	8.03878	14.4884	4.7202
MGLibB_11832	Crcp	12.1625	13.398	9.05526	9.4404
MGLibB_23876	Hdac9	22.5682	72.349	36.221	35.4015
MGLibA_51504	Ssu72	32.7036	13.398	16.2995	37.7616
MGLibA_44770	Rbm18	14.7301	26.7959	3.6221	4.7202
MGLibB_09774	Celf6	85.5428	99.1449	41.6542	59.0025
MGLibA_43007	Prpf38a	15.8112	13.398	19.9216	25.9611
MGLibB_28341	LOC102308570	29.8657	13.398	3.6221	0
MGLibA_10830	Clmn	65.4072	45.5531	34.41	56.6424
MGLibA_57882	Vhl	69.4613	533.239	382.132	49.5621
MGLibB_01117	4833403I15Rik	29.5954	24.1163	38.0321	30.6813
MGLibB_51054	Spon1	9.59485	5.35919	14.4884	14.1606
MGLibB_00163	1500009L16Rik	84.0563	61.6306	61.5758	80.2434
MGLibB_31901	Mrgprb1	3.64875	2.67959	3.6221	2.3601
MGLibB_36294	Olfr1329	7.16235	0	1.81105	2.3601
MGLibB_02494	Abracl	27.8386	109.863	14.4884	33.0414
MGLibA_06056	Avpr2	97.2999	125.941	135.829	165.207
MGLibB_53954	Tktl1	12.1625	8.03878	10.8663	4.7202
MGLibB_17596	Fam58b	12.1625	0	7.24421	4.7202
MGLibA_32108	Mrpl50	20.1357	56.2715	16.2995	44.8419
MGLibB_45833	Rnf14	100.678	93.7858	95.9858	162.847
MGLibA_09345	Cdc42ep1	181.897	364.425	197.405	228.93
MGLibB_61247	Zfp827	3.10819	0	0	9.4404
MGLibB_09481	Cdhr1	59.4611	294.755	56.1426	49.5621
MGLibA_29514	Lrrc58	45.4066	29.4755	34.41	21.2409
MGLibA_08979	Cct7	108.652	136.659	112.285	99.1243
MGLibB_43129	Prrt1	54.8663	40.1939	65.1979	66.0828
MGLibB_49837	Slfn2	57.5691	1701.54	269.847	77.8833
MGLibB_00155	1300017J02Rik	13.5139	0	12.6774	9.4404
MGLibB_41837	Polh	25.4061	5.35919	16.2995	25.9611
MGLibA_40950	Pik3c2b	57.1637	209.008	52.5205	77.8833
MGLibA_13832	Defb3	22.1628	34.8347	23.5437	25.9611
MGLibA_34709	Nr5a2	54.0555	66.9898	59.7647	40.1217
MGLibA_22494	Gphn	35.8118	227.765	25.3547	21.2409
MGLibB_00279	1700011E24Rik	29.5954	40.1939	59.7647	25.9611
MGLibA_07981	Capza2	145.95	3070.81	246.303	143.966
MGLibA_46348	Rps10	55.0015	40.1939	59.7647	63.7227
MGLibB_37620	Olfr519	8.10833	13.398	10.8663	16.5207
MGLibA_24998	Hsfy2	52.569	48.2327	59.7647	40.1217
MGLibB_34553	Npnt	135.274	702.053	313.312	188.808
MGLibB_13668	Ddx5	9.86513	2.67959	9.05526	2.3601
MGLibA_63076	mmu-mir-9-2	26.0818	1045.04	769.697	1970.68
MGLibA_29122	Lmo7	50.0013	109.863	117.718	47.202
MGLibB_33100	Naa25	20.2708	5.35919	21.7326	28.3212
MGLibA_00947	2610507B11Rik	15.541	21.4367	12.6774	16.5207
MGLibA_49571	Slc4a5	66.218	16.0776	21.7326	33.0414
MGLibA_16667	Esx1	58.6502	235.804	30.7879	47.202
MGLibA_21450	Gm4763	7.97319	0	5.43316	16.5207
MGLibB_11001	Cmtm8	12.0273	2.67959	3.6221	7.0803
MGLibA_51129	Sprr2e	95.1377	83.0674	99.6079	120.365
MGLibA_08702	Ccdc90b	82.0292	434.094	278.902	28.3212
MGLibA_62854	mmu-mir-376a	3.24333	2.67959	9.05526	0
MGLibA_20151	Glrp1	24.7304	66.9898	50.7095	257.251
MGLibB_53146	Tchp	23.9196	2.67959	16.2995	21.2409
MGLibB_29814	Ly9	44.0552	24.1163	19.9216	56.6424
MGLibA_36240	Olfr1305	61.4881	2098.12	1374.59	186.448
MGLibA_35116	Nup210	3.10819	2.67959	3.6221	2.3601
MGLibA_49170	Slc26a9	49.1905	32.1551	50.7095	80.2434
MGLibB_20134	Glra3	14.0544	13.398	10.8663	14.1606
MGLibA_07283	Btbd11	28.244	77.7082	19.9216	25.9611
MGLibA_13404	Dcdc2c	15.2707	58.9511	23.5437	18.8808
MGLibA_32031	Mrpl23	60.407	50.9123	56.1426	56.6424
MGLibA_02067	AI314180	7.83805	8.03878	5.43316	9.4404
MGLibA_04969	Arhgap4	16.3518	230.445	273.469	2822.68
MGLibA_38060	Olfr685	70.6776	133.98	32.5989	56.6424
MGLibA_24114	Hhipl2	19.46	21.4367	32.5989	18.8808
MGLibB_42236	Ppm1m	2.97305	560.035	3.6221	2.3601
MGLibB_16042	Emc3	0.540555	0	3.6221	0
MGLibA_03437	Agpat5	56.7583	88.4266	61.5758	70.803
MGLibB_48066	Sf3b5	21.8925	16.0776	7.24421	7.0803
MGLibB_11665	Cpeb2	20.8114	24.1163	14.4884	11.8005
MGLibA_46063	Ror1	49.7311	24.1163	43.4653	42.4818
MGLibA_56447	Ttc39b	17.4329	8.03878	14.4884	16.5207
MGLibA_48769	Slc14a2	97.5702	857.47	213.704	66.0828
MGLibA_28365	Lactbl1	31.6225	42.8735	36.221	35.4015
MGLibB_59369	Wdr76	15.1355	18.7572	34.41	9.4404
MGLibA_05770	Atp2a3	118.787	251.882	74.2531	80.2434
MGLibA_52762	Tas2r115	16.3518	37.5143	25.3547	30.6813
MGLibB_56185	Tsku	11.4868	16.0776	10.8663	11.8005
MGLibA_44929	Rcbtb2	42.1633	37.5143	39.8432	54.2823
MGLibA_01754	7420461P10Rik	27.4332	24.1163	19.9216	70.803
MGLibB_20103	Glis2	59.3259	182.212	50.7095	54.2823
MGLibB_17232	Fam162b	24.7304	292.076	210.082	30.6813
MGLibA_06693	Bcl2l11	30.8116	34.8347	27.1658	28.3212
MGLibB_43126	Prrg4	13.9193	13.398	14.4884	37.7616
MGLibA_59641	Wrn	66.8937	32.1551	50.7095	35.4015
MGLibB_35830	Olfr1156	40.2714	32.1551	45.2763	37.7616
MGLibA_26843	Kbtbd8	69.0559	769.043	351.344	75.5232
MGLibB_47177	Scfd2	8.91916	0	7.24421	4.7202
MGLibA_32683	Mup6	75.1372	163.455	88.7416	73.1631
MGLibA_63844	mmu-mir-694	1.21625	2.67959	1.81105	0
MGLibB_49732	Slc8a1	5.67583	0	1.81105	0
MGLibA_58001	Vmn1r128	39.0551	37.5143	41.6542	44.8419
MGLibB_56684	Txlnb	7.16235	2.67959	3.6221	9.4404
MGLibA_01086	3632451O06Rik	145.815	857.47	744.342	132.166
MGLibB_57250	Uhrf2	31.2171	10.7184	21.7326	40.1217
MGLibB_28922	Lilra6	34.4604	21.4367	50.7095	56.6424
MGLibB_12010	Cryba4	26.6223	21.4367	10.8663	11.8005
MGLibA_32521	Mtmr6	20.6762	8.03878	7.24421	14.1606
MGLibB_62733	NonTargetingControlGuideForMouse_0929	85.4077	32.1551	74.2531	54.2823
MGLibB_54898	Tmem92	23.7844	18.7572	30.7879	14.1606
MGLibB_50090	Smim18	32.7036	34.8347	27.1658	37.7616
MGLibA_23222	Gstz1	26.7575	144.698	21.7326	33.0414
MGLibA_04952	Arhgap33	42.839	32.1551	59.7647	40.1217
MGLibB_29424	Lrrc29	16.3518	61.6306	10.8663	9.4404
MGLibB_09173	Cd40	34.8658	112.543	97.7968	37.7616
MGLibA_51963	Stxbp1	115.273	321.551	166.617	134.526
MGLibA_15531	Eef1b2	36.4875	16.0776	18.1105	30.6813
MGLibB_27273	Kel	74.4615	182.212	77.8752	73.1631
MGLibB_41271	Plac1	7.43263	2.67959	0	2.3601
MGLibA_42606	Prdm6	98.6513	21.4367	74.2531	158.127
MGLibB_53504	Tfam	11.4868	16.0776	12.6774	2.3601
MGLibB_07063	Bola2	36.8929	93.7858	27.1658	14.1606
MGLibB_52102	Supt20	2.56764	0	0	0
MGLibA_48295	Sh3d21	48.9202	589.511	440.086	2555.99
MGLibB_50141	Smok2b	9.18944	2.67959	21.7326	0
MGLibA_10592	Clcn4-2	91.0835	651.141	711.744	5352.71
MGLibB_45034	Reep5	24.0547	5.35919	18.1105	28.3212
MGLibB_26665	Jam3	27.4332	192.931	103.23	28.3212
MGLibA_43238	Prss45	77.9751	42.8735	88.7416	99.1243
MGLibB_50780	Spata2	44.5958	305.474	76.0642	84.9636
MGLibB_11789	Cpxm2	35.8118	29.4755	45.2763	21.2409
MGLibA_19653	Gcn1l1	34.5955	150.057	79.6863	18.8808
MGLibB_19246	Gabra1	8.10833	182.212	70.631	283.212
MGLibB_01036	3110001I22Rik	1.21625	0	5.43316	0
MGLibA_50621	Sox18	67.7045	40.1939	45.2763	68.4429
MGLibA_35940	Olfr1199	42.0282	18.7572	30.7879	30.6813
MGLibB_56900	Ube2f	4.1893	5.35919	5.43316	4.7202
MGLibA_58940	Vpreb1	13.5139	24.1163	9.05526	18.8808
MGLibA_37715	Olfr552	19.46	10.7184	14.4884	33.0414
MGLibA_19259	Gabra3	57.8394	58.9511	67.0089	75.5232
MGLibA_06614	Bbs9	53.9204	1018.25	633.868	10042.2
MGLibB_00031	0610031J06Rik	39.7308	21.4367	45.2763	37.7616
MGLibA_57770	Vapa	32.8387	0	10.8663	4.7202
MGLibB_35240	Nyx	3.91902	2.67959	1.81105	0
MGLibB_22230	Gng11	25.5412	18.7572	9.05526	23.601
MGLibA_42503	Pqlc1	60.8124	447.492	85.1195	66.0828
MGLibA_43264	Prss56	70.137	99.1449	54.3316	59.0025
MGLibB_44832	Rbm5	25.6764	3081.53	1063.09	3226.26
MGLibB_17403	Fam19a4	56.7583	1931.99	1006.95	778.833
MGLibB_36049	Olfr1241	2.16222	2.67959	3.6221	2.3601
MGLibB_33518	Ndufa13	61.0827	42.8735	52.5205	40.1217
MGLibB_55221	Tnn	15.8112	3652.29	3547.85	12220.6
MGLibB_49465	Slc3a1	8.91916	10.7184	5.43316	2.3601
MGLibA_59182	Was	286.089	2449.15	2390.59	7578.29
MGLibA_29357	Lrp4	54.3258	249.202	28.9768	25.9611
MGLibA_37847	Olfr603	25.9466	26.7959	43.4653	18.8808
MGLibB_19311	Gadd45b	13.5139	2.67959	10.8663	0
MGLibA_13466	Dctn2	9.18944	2.67959	14.4884	4.7202
MGLibA_37648	Olfr524	111.76	69.6694	101.419	106.205
MGLibB_35289	Oat	16.3518	18.7572	28.9768	16.5207
MGLibA_38174	Olfr727	52.0284	618.986	699.066	18491.4
MGLibB_16145	Endog	74.4615	61.6306	90.5526	103.844
MGLibB_19103	Fxn	27.7034	1926.63	894.66	2126.45
MGLibB_15976	Elmod2	5.00013	0	9.05526	4.7202
MGLibA_02011	A830010M20Rik	214.195	249.202	239.059	219.489
MGLibB_12312	Ctla4	19.1897	2.67959	7.24421	14.1606
MGLibA_42182	Ppie	35.5415	24.1163	10.8663	68.4429
MGLibA_00240	1700007K09Rik	58.7854	144.698	126.774	82.6035
MGLibB_10979	Cmtm2a	13.2436	8.03878	9.05526	14.1606
MGLibA_37137	Olfr311	127.706	69.6694	81.4974	139.246
MGLibA_05500	Aspa	56.2177	56.2715	45.2763	63.7227
MGLibB_29274	Lrcol1	62.0287	80.3878	88.7416	77.8833
MGLibA_04521	Ap3b1	14.4598	32.1551	9.05526	14.1606
MGLibA_00888	2410141K09Rik	26.2169	13.398	23.5437	28.3212
MGLibB_36395	Olfr1364	64.0558	72.349	65.1979	73.1631
MGLibB_44241	Rab7l1	1.48653	5.35919	0	0
MGLibA_29675	Lsmd1	68.5154	45.5531	48.8984	61.3626
MGLibA_10313	Chrm1	23.5141	16.0776	18.1105	11.8005
MGLibB_03455	Agrn	24.4601	731.529	637.49	8831.5
MGLibA_23941	Hebp1	39.4605	29.4755	41.6542	42.4818
MGLibA_00653	1810046K07Rik	139.463	450.172	170.239	188.808
MGLibB_40494	Pfkl	23.2439	29.4755	12.6774	23.601
MGLibA_27834	Klrb1	34.1901	123.261	21.7326	42.4818
MGLibA_61490	Zfyve1	61.353	543.957	52.5205	35.4015
MGLibA_63490	mmu-mir-301b	83.5158	198.29	48.8984	56.6424
MGLibB_59762	Xpnpep3	6.6218	0	7.24421	2.3601
MGLibA_21226	Gm2696	12.9733	0	1.81105	2.3601
MGLibA_15632	Efnb1	13.3787	10.7184	7.24421	23.601
MGLibB_62400	NonTargetingControlGuideForMouse_0596	64.7315	75.0286	74.2531	47.202
MGLibB_26137	Ints3	1.35139	0	0	2.3601
MGLibB_50063	Smg7	0.675694	2.67959	0	0
MGLibB_17810	Fastkd3	22.7033	160.776	57.9537	18.8808
MGLibB_14700	Dok2	30.4062	10.7184	19.9216	33.0414
MGLibB_12971	Cyp4f40	30.6765	1728.34	994.268	271.412
MGLibA_03448	Agr2	34.3252	21.4367	45.2763	21.2409
MGLibA_21549	Gm5111	16.7572	5.35919	10.8663	35.4015
MGLibA_33796	Neurl1a	54.7312	26.7959	28.9768	68.4429
MGLibB_40946	Pik3ca	51.7581	34.8347	50.7095	21.2409
MGLibB_34359	Nol4	25.1358	40.1939	36.221	47.202
MGLibA_44239	Rab5a	49.8662	58.9511	56.1426	25.9611
MGLibA_03123	Adck3	49.0554	184.892	85.1195	422.458
MGLibB_09328	Cdc37l1	7.02722	10.7184	9.05526	11.8005
MGLibB_06221	B9d1	5.67583	0	1.81105	4.7202
MGLibB_51339	Srrm1	0.405416	0	0	0
MGLibB_07908	Canx	28.244	16.0776	10.8663	11.8005
MGLibA_38059	Olfr685	37.7037	107.184	18.1105	28.3212
MGLibB_47896	Serpinb6d	7.83805	128.62	3.6221	2.3601
MGLibB_42556	Prcp	61.4881	40.1939	50.7095	40.1217
MGLibB_02300	Abca9	26.4872	257.241	32.5989	30.6813
MGLibA_04146	Angptl4	17.2978	5.35919	7.24421	28.3212
MGLibB_19221	Gabarapl1	15.1355	10.7184	7.24421	21.2409
MGLibB_36359	Olfr1351	4.45958	0	1.81105	2.3601
MGLibA_00180	1600014C10Rik	5.00013	2.67959	0	0
MGLibB_31533	Mmp15	62.9747	32.1551	43.4653	94.404
MGLibA_02569	Acat1	116.625	458.21	150.317	108.565
MGLibA_43572	Ptch2	237.979	1146.87	398.432	679.709
MGLibA_34070	Nisch	64.5963	20078.2	13934.2	33574.8
MGLibA_15717	Ehd4	24.325	48.2327	39.8432	47.202
MGLibB_52254	Sycn	36.8929	16.0776	36.221	23.601
MGLibA_45130	Rerg	32.4333	117.902	39.8432	14.1606
MGLibB_32168	Mrps27	24.7304	24.1163	19.9216	25.9611
MGLibB_45928	Rnf223	134.463	262.6	242.681	146.326
MGLibA_15229	Dysf	28.1089	40.1939	32.5989	56.6424
MGLibB_37124	Olfr310	38.92	125.941	68.82	51.9222
MGLibA_18844	Foxp2	76.6237	69.6694	97.7968	61.3626
MGLibB_16308	Epha1	73.5155	131.3	67.0089	84.9636
MGLibB_60694	Zfp395	9.59485	8.03878	7.24421	4.7202
MGLibA_00057	2016-09-10	51.8933	50.9123	56.1426	61.3626
MGLibB_42045	Pou4f1	37.028	2.67959	3.6221	4.7202
MGLibB_27902	Kpna2	23.379	5.35919	10.8663	21.2409
MGLibB_23013	Grk4	1.62167	2.67959	0	4.7202
MGLibA_40772	Phospho1	71.4884	779.762	588.592	89.6838
MGLibA_27000	Kcnj2	133.382	2178.51	1131.91	1475.06
MGLibA_10686	Clec10a	24.4601	5.35919	16.2995	28.3212
MGLibB_43849	Ptx3	21.2168	5.35919	14.4884	18.8808
MGLibB_57343	Unk	12.2976	0	1.81105	2.3601
MGLibA_26298	Irf2bp1	41.2173	24.1163	28.9768	25.9611
MGLibA_30768	Mdn1	0.540555	0	5.43316	2.3601
MGLibA_66006	mmu-mir-135a-1	54.0555	18.7572	30.7879	28.3212
MGLibA_43632	Ptges	93.516	1776.57	1184.43	22498.8
MGLibA_44865	Rbmx2	9.0543	0	3.6221	2.3601
MGLibB_38195	Olfr738	42.0282	26.7959	52.5205	61.3626
MGLibB_25295	Idnk	18.2437	16.0776	9.05526	7.0803
MGLibB_00809	2310039H08Rik	10.1354	5.35919	14.4884	2.3601
MGLibB_15259	E130308A19Rik	2.70278	0	3.6221	0
MGLibA_46449	Rps6ka6	78.2453	179.533	52.5205	96.7642
MGLibB_05979	Atr	17.8383	10.7184	16.2995	7.0803
MGLibA_64855	mmu-mir-7119	6.6218	2.67959	0	4.7202
MGLibB_23497	H2-K1	50.4068	2339.28	1217.03	89.6838
MGLibA_29306	Lrguk	94.7323	117.902	117.718	113.285
MGLibB_51019	Spint5	31.2171	10.7184	16.2995	16.5207
MGLibB_57693	Uts2	4.865	0	1.81105	0
MGLibA_10955	Cmklr1	221.492	2028.45	1148.21	3662.88
MGLibB_46519	Rrm2b	40.8119	21.4367	39.8432	21.2409
MGLibB_23253	Gtf2h2	26.0818	29.4755	30.7879	23.601
MGLibA_41694	Pnlip	92.5701	900.343	157.562	63.7227
MGLibA_55797	Trim37	26.8926	29.4755	25.3547	23.601
MGLibB_39068	Otogl	27.9737	37.5143	28.9768	23.601
MGLibA_24855	Hrh4	30.6765	26.7959	41.6542	18.8808
MGLibA_04748	Apon	190.681	131.3	159.373	151.046
MGLibB_17034	Fam104a	40.8119	26.7959	30.7879	30.6813
MGLibB_29813	Ly9	9.18944	2.67959	7.24421	21.2409
MGLibA_37843	Olfr601	171.626	152.737	179.294	191.168
MGLibB_50819	Spata7	37.2983	26.7959	28.9768	33.0414
MGLibA_14418	Dnah1	52.1636	64.3102	43.4653	70.803
MGLibA_28373	Lag3	65.5423	99.1449	57.9537	59.0025
MGLibA_42975	Pros1	13.1085	18.7572	16.2995	9.4404
MGLibB_41416	Plekhb2	11.8922	8.03878	25.3547	16.5207
MGLibB_18557	Flnc	138.382	195.61	181.105	200.609
MGLibA_01662	5730455P16Rik	40.5416	93.7858	41.6542	37.7616
MGLibB_57505	Usp17lb	42.5687	34.8347	41.6542	51.9222
MGLibA_38703	Olfr955	6.75694	2.67959	12.6774	2.3601
MGLibA_23147	Gspt1	7.70291	0	0	0
MGLibB_57105	Uchl5	15.2707	0	3.6221	2.3601
MGLibB_13302	Dbh	44.1904	16.0776	25.3547	25.9611
MGLibA_53565	Tfec	27.8386	246.523	21.7326	21.2409
MGLibB_39534	Parp16	8.3786	10.7184	12.6774	18.8808
MGLibB_35488	Olfr1012	39.0551	8.03878	16.2995	7.0803
MGLibB_26452	Itga3	20.5411	5.35919	7.24421	2.3601
MGLibB_15495	Edn1	22.9736	391.221	210.082	49.5621
MGLibB_35231	Nyap1	20.5411	8.03878	12.6774	11.8005
MGLibA_25340	Ifi202b	43.5147	345.668	264.414	2142.97
MGLibA_00338	1700016K19Rik	60.9476	42.8735	30.7879	47.202
MGLibA_02838	Actn4	128.382	586.831	119.529	113.285
MGLibB_51778	Stk32c	27.8386	10.7184	18.1105	9.4404
MGLibB_01172	4921536K21Rik	27.0278	147.378	43.4653	16.5207
MGLibB_13038	Cyth1	45.5418	13.398	9.05526	25.9611
MGLibA_31028	Mettl20	16.0815	0	10.8663	21.2409
MGLibB_23529	H2-M1	42.839	24.1163	19.9216	33.0414
MGLibB_53535	Tfcp2	54.3258	811.917	856.628	177.008
MGLibA_37254	Olfr357	129.058	444.812	311.501	318.614
MGLibB_18894	Frat1	12.703	32.1551	14.4884	16.5207
MGLibB_61239	Zfp820	18.514	8.03878	19.9216	23.601
MGLibA_63914	mmu-mir-5046	32.5684	8.03878	10.8663	14.1606
MGLibA_49365	Slc35f5	58.2448	133.98	83.3084	40.1217
MGLibB_24760	Hoxd9	17.8383	10.7184	23.5437	25.9611
MGLibA_48323	Sh3rf2	89.7321	351.027	242.681	82.6035
MGLibA_03171	Add1	69.191	1227.25	1284.04	2154.77
MGLibB_17890	Fbxl15	15.8112	10.7184	27.1658	16.5207
MGLibB_19668	Gc	110.408	104.504	110.474	120.365
MGLibA_47122	Scaf8	58.2448	45.5531	48.8984	92.0439
MGLibA_35997	Olfr1218	70.137	29.4755	34.41	59.0025
MGLibA_09919	Cep72	71.7587	104.504	76.0642	99.1243
MGLibB_51264	Srf	9.0543	0	1.81105	7.0803
MGLibA_02028	AA415398	58.6502	61.6306	54.3316	63.7227
MGLibB_05639	Atg2b	4.865	0	5.43316	0
MGLibA_41361	Plcl1	16.0815	0	3.6221	4.7202
MGLibA_09492	Cdip1	53.1095	53.5919	65.1979	30.6813
MGLibB_13079	D130043K22Rik	2.56764	0	0	4.7202
MGLibB_00851	2410002F23Rik	10.8111	0	0	4.7202
MGLibA_18923	Frmd3	141.49	270.639	159.373	169.927
MGLibB_51159	Spr	17.9735	5.35919	5.43316	9.4404
MGLibA_13871	Defb7	43.785	24.1163	48.8984	37.7616
MGLibB_47951	Serpinh1	16.2167	5.35919	12.6774	7.0803
MGLibA_56102	Trpv1	133.652	3295.9	1329.31	4241.1
MGLibA_22972	Grik3	22.2979	99.1449	9.05526	0
MGLibA_04523	Ap3b1	32.8387	66.9898	43.4653	44.8419
MGLibA_51891	Strc	21.7573	5.35919	5.43316	9.4404
MGLibA_65422	mmu-mir-7050	8.3786	10.7184	3.6221	4.7202
MGLibA_21889	Gm7030	22.7033	0	9.05526	4.7202
MGLibA_23423	Gys2	11.4868	5.35919	3.6221	25.9611
MGLibA_00189	1600015I10Rik	31.3522	8.03878	10.8663	35.4015
MGLibB_39072	Otog	5.94611	8.03878	1.81105	2.3601
MGLibA_44343	Rad23a	15.4058	142.018	1.81105	2.3601
MGLibB_61662	Zp2	29.7305	13.398	21.7326	25.9611
MGLibA_28238	Krtap5-4	4.45958	0	7.24421	0
MGLibA_57102	Ubxn2b	17.1626	16.0776	12.6774	4.7202
MGLibA_25408	Ifltd1	5.81097	13.398	16.2995	2.3601
MGLibB_06977	Bmp1	21.8925	8.03878	18.1105	28.3212
MGLibB_01511	4932443I19Rik	11.0814	18.7572	25.3547	2.3601
MGLibA_35145	Nup62	30.2711	26.7959	28.9768	23.601
MGLibA_45191	Rfesd	127.706	85.747	117.718	113.285
MGLibB_02798	Actb	18.1086	13.398	10.8663	16.5207
MGLibA_57603	Usp39	45.1363	32.1551	32.5989	44.8419
MGLibA_05787	Atp2c2	33.2441	1897.15	1369.16	6329.79
MGLibB_24599	Hnrnpr	26.2169	18.7572	25.3547	30.6813
MGLibA_23029	Grlf1	23.7844	3663	2997.29	10733.7
MGLibA_41055	Pip	19.8654	2.67959	14.4884	9.4404
MGLibA_66155	mmu-mir-503	54.1906	493.045	41.6542	63.7227
MGLibB_02131	AU018091	82.7049	937.858	193.783	110.925
MGLibB_57168	Uggt2	5.13527	0	12.6774	0
MGLibA_30771	Mdp1	71.4884	2403.6	313.312	276.132
MGLibA_51674	Stard6	71.083	777.082	653.79	80.2434
MGLibB_36534	Olfr1420	37.4334	3652.29	932.692	1333.46
MGLibA_59639	Wrnip1	67.4342	45.5531	79.6863	108.565
MGLibB_02203	Aaed1	0	0	0	2.3601
MGLibB_03098	Adarb1	7.43263	10.7184	7.24421	18.8808
MGLibB_52744	Tas2r115	3.64875	0	1.81105	7.0803
MGLibB_25389	Ifitm3	15.9464	8.03878	5.43316	23.601
MGLibA_61832	mmu-mir-206	56.6231	53.5919	54.3316	56.6424
MGLibB_16005	Elovl6	20.6762	26.7959	30.7879	9.4404
MGLibA_12379	Ctsa	29.0548	6548.93	1968.61	3516.55
MGLibB_07130	Bpnt1	110.273	217.047	103.23	132.166
MGLibB_37756	Olfr571	7.16235	13.398	9.05526	14.1606
MGLibB_24550	Hnmt	1.48653	0	3.6221	7.0803
MGLibA_42921	Prnd	62.9747	267.959	41.6542	51.9222
MGLibA_33785	Neu1	57.7043	40.1939	61.5758	40.1217
MGLibA_58113	Vmn1r176	151.491	731.529	548.749	221.85
MGLibB_32177	Mrps30	92.8403	131.3	166.617	84.9636
MGLibB_58068	Vmn1r169	18.514	5.35919	23.5437	9.4404
MGLibA_19056	Fuca1	31.8927	64.3102	25.3547	49.5621
MGLibA_49369	Slc35f6	98.2459	613.627	139.451	160.487
MGLibB_38512	Olfr877	17.2978	10.7184	9.05526	21.2409
MGLibA_56069	Trpd52l3	7.43263	0	3.6221	0
MGLibB_52474	Taar7d	44.7309	32.1551	36.221	47.202
MGLibA_16911	F13a1	95.6782	766.364	248.114	132.166
MGLibA_42285	Ppp1r13b	58.1097	200.969	67.0089	49.5621
MGLibB_48234	Sh2d3c	34.1901	13.398	18.1105	9.4404
MGLibA_28819	Lgals7	77.1642	26.7959	41.6542	28.3212
MGLibA_62043	mmu-mir-215	21.4871	18.7572	14.4884	25.9611
MGLibB_14849	Dpy30	20.1357	10.7184	16.2995	25.9611
MGLibB_53992	Tlk2	6.89208	5.35919	5.43316	4.7202
MGLibA_05870	Atp6v0c	10.9462	2.67959	1.81105	2.3601
MGLibB_50301	Snrk	182.032	527.88	287.957	146.326
MGLibA_64627	mmu-mir-190b	81.2184	3826.46	1740.42	6346.31
MGLibA_47899	Serpinb5	47.5688	361.745	202.838	672.629
MGLibB_14923	Dsc3	6.21638	0	3.6221	2.3601
MGLibA_66982	NonTargetingControlGuideForMouse_0577	20.0005	10.7184	12.6774	9.4404
MGLibB_28048	Krt71	52.4338	284.037	41.6542	35.4015
MGLibA_65758	mmu-mir-3074-2	35.5415	32.1551	19.9216	33.0414
MGLibA_49327	Slc35c1	105.408	2237.46	1916.09	5562.76
MGLibA_39785	Pcdhb12	68.6505	53.5919	106.852	56.6424
MGLibA_51706	Stat6	16.3518	16.0776	10.8663	7.0803
MGLibA_02749	Acsl1	58.9205	125.941	85.1195	54.2823
MGLibA_48130	Sfta2	41.893	21.4367	36.221	56.6424
MGLibA_30080	Magel2	48.1094	34.8347	32.5989	56.6424
MGLibA_37751	Olfr566	167.977	32675	37985	73120.7
MGLibA_54514	Tmem198b	53.1095	93.7858	43.4653	47.202
MGLibA_47189	Scfd2	10.5408	16.0776	18.1105	4.7202
MGLibB_41932	Polr3g	5.67583	5.35919	1.81105	11.8005
MGLibB_27900	Kpna1	25.2709	13.398	43.4653	11.8005
MGLibB_18055	Fbxw14	20.5411	13.398	18.1105	30.6813
MGLibA_55745	Trim24	105.003	133.98	121.341	122.725
MGLibB_13384	Dcbld1	26.8926	64.3102	28.9768	4.7202
MGLibA_56706	Txlng	12.1625	2.67959	9.05526	16.5207
MGLibB_03571	Ajuba	82.0292	66.9898	92.3637	92.0439
MGLibA_36981	Olfr235	48.9202	42.8735	52.5205	73.1631
MGLibB_12621	Cyb561	35.5415	26.7959	38.0321	37.7616
MGLibA_23133	Gsg2	56.3529	53.5919	32.5989	59.0025
MGLibB_48152	Sgce	125.679	581.472	103.23	127.445
MGLibB_28360	Lad1	9.32457	2.67959	18.1105	4.7202
MGLibA_13616	Ddx39b	17.1626	5.35919	5.43316	18.8808
MGLibA_56198	Tshz3	6.48666	0	3.6221	9.4404
MGLibB_28971	Lin54	17.568	16.0776	9.05526	16.5207
MGLibA_54322	Tmem132d	90.0024	160.776	97.7968	89.6838
MGLibA_38261	Olfr768	131.49	884.266	220.948	179.368
MGLibA_56993	Ube3b	131.49	139.339	126.774	181.728
MGLibA_05161	Arl6ip1	86.0834	903.023	114.096	103.844
MGLibA_22868	Gpx6	13.2436	8.03878	9.05526	14.1606
MGLibB_27406	Kif5a	6.75694	0	10.8663	14.1606
MGLibB_24652	Hoxa13	59.4611	190.251	41.6542	54.2823
MGLibA_54584	Tmem218	14.7301	8.03878	9.05526	4.7202
MGLibA_48424	Shox2	108.516	718.131	753.398	1805.48
MGLibB_17882	Fbxl12	6.21638	2.67959	1.81105	16.5207
MGLibA_10334	Chrna2	55.4069	93.7858	70.631	84.9636
MGLibA_24878	Hs3st2	15.1355	8.03878	14.4884	11.8005
MGLibB_08021	Car5a	9.18944	5.35919	7.24421	4.7202
MGLibA_59928	Ypel1	25.1358	10.7184	30.7879	44.8419
MGLibA_19499	Gas7	81.8941	190.251	74.2531	118.005
MGLibA_07769	Calb2	117.165	58.9511	106.852	118.005
MGLibB_55067	Tnfrsf10b	94.0566	88.4266	63.3868	40.1217
MGLibA_49486	Slc40a1	3.37847	2.67959	0	0
MGLibA_54954	Tmod4	170.14	136.659	230.004	219.489
MGLibA_33019	Myot	147.031	535.919	479.929	1847.96
MGLibA_10547	Cks2	92.8403	123.261	153.939	110.925
MGLibA_14006	Dgcr8	18.1086	10.7184	27.1658	14.1606
MGLibB_11952	Crnkl1	23.5141	391.221	27.1658	30.6813
MGLibA_29198	Lpar1	1.7568	0	3.6221	2.3601
MGLibA_06039	Avil	91.8944	308.153	68.82	82.6035
MGLibA_50518	Socs6	86.4888	195.61	83.3084	169.927
MGLibA_25060	Hspb3	73.7858	168.814	43.4653	66.0828
MGLibA_06288	BC026585	19.1897	8.03878	12.6774	14.1606
MGLibA_59582	Wnt16	0.270278	0	0	0
MGLibA_02404	Abhd10	24.325	13.398	19.9216	18.8808
MGLibB_15128	Duxbl2	18.9194	736.888	610.325	434.259
MGLibA_43107	Prr5l	108.787	1867.68	1897.98	6341.59
MGLibA_25170	Hvcn1	8.51374	5.35919	3.6221	4.7202
MGLibA_50385	Sntg1	12.9733	3585.3	1593.73	4167.94
MGLibA_32588	Muc13	76.6237	168.814	86.9305	96.7642
MGLibB_32038	Mrpl32	9.72999	0	5.43316	4.7202
MGLibA_48959	Slc22a3	83.2455	1232.61	932.692	75.5232
MGLibA_64099	mmu-mir-466c-1	166.761	3282.5	2104.44	2157.13
MGLibA_09356	Cdc42ep4	136.085	88.4266	135.829	120.365
MGLibB_06623	Bcan	19.3248	190.251	16.2995	16.5207
MGLibA_25946	Ilkap	47.9743	50.9123	67.0089	73.1631
MGLibB_32243	Ms4a4c	2.02708	0	5.43316	0
MGLibB_22130	Gml	8.78402	2.67959	14.4884	0
MGLibB_32852	Myh7	27.8386	10.7184	9.05526	25.9611
MGLibA_58923	Vmo1	50.677	364.425	369.455	939.32
MGLibB_52451	Taar1	57.7043	305.474	121.341	56.6424
MGLibA_10045	Cfc1	17.7032	69.6694	48.8984	505.062
MGLibB_52447	T2	16.2167	0	12.6774	37.7616
MGLibB_06613	Bbs9	44.1904	32.1551	27.1658	47.202
MGLibA_14437	Dnah9	110.949	72.349	103.23	99.1243
MGLibA_64495	mmu-mir-7003	2.83791	0	0	0
MGLibA_13274	Dapp1	19.8654	16.0776	7.24421	14.1606
MGLibA_48157	Sfxn5	18.9194	999.488	952.614	33.0414
MGLibB_18861	Foxs1	71.2181	77.7082	101.419	84.9636
MGLibB_00461	1700030K09Rik	3.37847	0	0	2.3601
MGLibA_54467	Tmem182	30.6765	13.398	18.1105	16.5207
MGLibB_47981	Sesn3	57.8394	688.655	325.989	66.0828
MGLibA_08128	Casp8	15.0004	5.35919	21.7326	21.2409
MGLibB_41650	Pmpcb	14.8653	8.03878	9.05526	11.8005
MGLibB_59771	Xpo5	13.7842	37.5143	9.05526	14.1606
MGLibA_66522	NonTargetingControlGuideForMouse_0117	168.113	1077.2	796.863	4694.24
MGLibA_17870	Fbn1	111.354	2395.56	1874.44	14049.7
MGLibA_34212	Nlrp4b	44.8661	26.7959	27.1658	42.4818
MGLibB_11871	Creg1	25.5412	29.4755	23.5437	25.9611
MGLibA_00456	1700030J22Rik	26.4872	190.251	41.6542	23.601
MGLibA_12496	Cuta	55.2718	594.87	68.82	42.4818
MGLibA_02342	Abcc2	1.21625	0	0	0
MGLibA_09756	Cela3b	17.568	10.7184	18.1105	4.7202
MGLibB_36287	Olfr1324	5.27041	0	3.6221	9.4404
MGLibB_32484	Mtm1	22.8385	13.398	30.7879	28.3212
MGLibB_43592	Ptgdr	12.8382	2.67959	1.81105	0
MGLibA_23761	Hax1	12.8382	10.7184	1.81105	9.4404
MGLibB_22862	Gpx7	31.8927	34.8347	16.2995	11.8005
MGLibB_48600	Skint11	9.72999	91.1062	19.9216	0
MGLibA_05281	Arrb2	7.43263	0	12.6774	4.7202
MGLibA_30205	Map1a	197.843	359.065	217.326	205.329
MGLibA_05950	Atp9a	62.7044	345.668	108.663	82.6035
MGLibA_53711	Thbs2	14.8653	0	0	0
MGLibA_48504	Sil1	40.6768	551.996	494.417	56.6424
MGLibA_12919	Cyp46a1	24.0547	93.7858	12.6774	16.5207
MGLibB_50871	Specc1	33.6496	26.7959	38.0321	47.202
MGLibA_35042	Nudt21	89.1916	72.349	70.631	68.4429
MGLibA_66777	NonTargetingControlGuideForMouse_0372	146.22	372.463	333.234	195.888
MGLibB_50275	Sncg	9.45971	251.882	188.349	464.94
MGLibA_16402	Eps8l1	181.356	342.988	217.326	259.611
MGLibA_32390	Mt4	195.411	436.774	204.649	186.448
MGLibB_17843	Fblim1	27.4332	34.8347	16.2995	25.9611
MGLibA_33176	Naga	47.5688	26.7959	23.5437	49.5621
MGLibA_15352	Ear11	15.9464	5.35919	14.4884	9.4404
MGLibB_57758	Vars	5.00013	0	3.6221	11.8005
MGLibA_37994	Olfr659	50.2716	203.649	137.64	118.005
MGLibB_48961	Slc22a8	91.4889	6240.77	3462.73	11363.9
MGLibB_56629	Tulp2	32.163	9158.85	3734.39	4252.9
MGLibA_58469	Vmn1r6	11.3517	13.398	9.05526	9.4404
MGLibA_27659	Klhl41	62.8395	490.366	456.385	564.064
MGLibB_47862	Serpinb1b	16.0815	8.03878	7.24421	16.5207
MGLibA_55720	Trim12a	2.70278	0	1.81105	2.3601
MGLibB_15720	Ehmt2	16.0815	5.35919	3.6221	2.3601
MGLibA_37824	Olfr596	22.0276	13.398	23.5437	4.7202
MGLibA_02399	Abcg5	48.3797	501.084	472.685	422.458
MGLibA_03890	Alox12b	2.97305	5.35919	1.81105	2.3601
MGLibA_36496	Olfr1402	59.1908	163.455	95.9858	42.4818
MGLibB_17340	Fam187a	47.0283	29.4755	30.7879	40.1217
MGLibB_10836	Cln3	18.514	16.0776	30.7879	28.3212
MGLibA_24075	Heyl	121.219	107.184	143.073	143.966
MGLibB_23344	Gucy1a2	30.9468	32.1551	25.3547	42.4818
MGLibB_17986	Fbxo34	12.8382	2.67959	9.05526	7.0803
MGLibB_51938	Stx6	35.2712	34.8347	21.7326	21.2409
MGLibB_55686	Trib3	0.945971	53.5919	1.81105	2.3601
MGLibB_17518	Fam26d	29.5954	21.4367	39.8432	25.9611
MGLibA_57721	Uvrag	85.5428	259.921	110.474	120.365
MGLibA_42368	Ppp1r3f	12.1625	18.7572	16.2995	30.6813
MGLibB_25318	Ier3	63.7855	75.0286	54.3316	54.2823
MGLibA_44881	Rbp1	78.1102	187.572	72.4421	99.1243
MGLibB_09175	Cd44	11.2165	1299.6	1398.13	1973.04
MGLibA_33168	Nadsyn1	97.435	147.378	124.963	115.645
MGLibA_03328	Afap1	17.8383	16.0776	12.6774	23.601
MGLibA_22971	Grik2	53.7852	42.8735	57.9537	73.1631
MGLibA_03775	Aldh3a1	27.9737	32.1551	41.6542	4.7202
MGLibB_07138	Brap	15.6761	147.378	7.24421	14.1606
MGLibA_56922	Ube2g1	145.815	2312.49	1179	2782.56
MGLibA_17050	Fam107a	24.5953	10.7184	16.2995	23.601
MGLibB_01852	9430020K01Rik	5.13527	0	1.81105	0
MGLibB_05577	Atat1	21.8925	8.03878	14.4884	30.6813
MGLibB_00026	0610012H03Rik	7.83805	0	1.81105	2.3601
MGLibA_19869	Ggt7	68.6505	50.9123	54.3316	99.1243
MGLibB_16681	Etfb	14.4598	50.9123	7.24421	14.1606
MGLibA_41275	Pla2r1	33.6496	21.4367	38.0321	49.5621
MGLibA_33226	Nanp	68.3802	75.0286	47.0874	96.7642
MGLibB_18395	Fgr	20.2708	32.1551	14.4884	18.8808
MGLibA_48698	Slc10a2	74.5966	72.349	106.852	103.844
MGLibB_06079	Azgp1	23.1087	10.7184	28.9768	14.1606
MGLibB_40577	Pgm1	32.2982	77.7082	70.631	51.9222
MGLibA_44473	Ranbp1	7.29749	0	3.6221	0
MGLibB_51766	Stk30	48.65	45.5531	72.4421	54.2823
MGLibB_02499	Abr	7.70291	10.7184	9.05526	2.3601
MGLibB_59618	Wrnip1	4.72986	0	1.81105	0
MGLibB_06737	Bcl9l	16.3518	8.03878	14.4884	23.601
MGLibB_47109	Scai	5.54069	0	3.6221	9.4404
MGLibB_34364	Nol6	10.1354	8.03878	7.24421	2.3601
MGLibA_45301	Rgs14	12.2976	2.67959	14.4884	4.7202
MGLibA_02474	Abi3	10.5408	29.4755	9.05526	0
MGLibA_37649	Olfr524	96.4891	72.349	110.474	134.526
MGLibA_49177	Slc27a2	73.6506	139.339	56.1426	80.2434
MGLibB_14811	Dpp8	44.1904	40.1939	34.41	44.8419
MGLibA_12271	Ctcf	3.91902	2.67959	5.43316	7.0803
MGLibB_50988	Spink3	39.8659	289.396	155.75	40.1217
MGLibB_40142	Pde6h	42.4336	24.1163	45.2763	23.601
MGLibA_59653	Wscd2	121.084	222.406	121.341	132.166
MGLibB_57527	Usp20	52.0284	85.747	54.3316	80.2434
MGLibB_43662	Ptk2	0.810833	0	1.81105	0
MGLibB_56216	Tspan15	37.028	18.7572	48.8984	54.2823
MGLibA_65610	mmu-mir-7062	23.7844	13.398	30.7879	23.601
MGLibB_50726	Spag8	16.0815	5.35919	5.43316	23.601
MGLibA_06248	BC005764	72.5695	75.0286	94.1747	108.565
MGLibA_32716	Mvb12b	40.947	257.241	50.7095	68.4429
MGLibB_16414	Epx	28.9197	40.1939	27.1658	21.2409
MGLibB_53626	Tgm1	2.56764	0	0	0
MGLibA_02406	Abhd11	21.4871	187.572	77.8752	30.6813
MGLibB_03910	Aloxe3	133.652	463.57	293.39	151.046
MGLibB_07441	C1qc	17.1626	5.35919	27.1658	40.1217
MGLibB_31109	Mfap4	17.7032	8.03878	25.3547	21.2409
MGLibA_60650	Zfp354b	16.8923	107.184	32.5989	21.2409
MGLibB_19989	Gjb1	7.02722	0	0	4.7202
MGLibA_58117	Vmn1r178	60.0016	120.582	88.7416	108.565
MGLibB_19140	Fyttd1	68.2451	45.5531	65.1979	47.202
MGLibB_35666	Olfr1093	91.2187	1288.88	1599.16	11333.2
MGLibA_12315	Ctla2b	18.2437	13.398	23.5437	18.8808
MGLibA_47407	Scube3	109.057	704.733	99.6079	99.1243
MGLibB_11984	Crxos	20.0005	58.9511	18.1105	28.3212
MGLibA_57100	Ubxn2a	3.37847	5.35919	3.6221	0
MGLibB_11238	Cog4	37.7037	61.6306	45.2763	35.4015
MGLibB_56042	Trpc5	53.515	18.7572	39.8432	30.6813
MGLibB_11459	Copg2	26.0818	16.0776	39.8432	18.8808
MGLibA_51492	Ssty1	19.0546	209.008	106.852	627.787
MGLibA_24407	Hist4h4	19.5951	10.7184	19.9216	9.4404
MGLibA_39840	Pcdhb8	50.9473	42.8735	43.4653	23.601
MGLibB_07339	Btla	92.2998	474.288	469.063	2258.62
MGLibA_66273	mmu-mir-5132	14.4598	2.67959	10.8663	9.4404
MGLibB_44734	Rbm11	15.9464	13.398	12.6774	11.8005
MGLibA_11492	Copz1	47.4337	150.057	21.7326	68.4429
MGLibB_44531	Raph1	3.51361	0	1.81105	4.7202
MGLibA_56785	Tysnd1	60.2719	436.774	431.03	1675.67
MGLibB_30562	Mboat2	45.9472	503.764	63.3868	47.202
MGLibB_31258	Mib1	111.084	155.416	128.585	113.285
MGLibA_17975	Fbxo28	41.3525	50.9123	16.2995	14.1606
MGLibA_22052	Gm8994	70.0019	96.4654	57.9537	56.6424
MGLibA_20860	Gm14920	97.7053	125.941	108.663	167.567
MGLibA_63460	mmu-mir-6963	10.4057	16.0776	23.5437	14.1606
MGLibA_12737	Cyp26c1	15.4058	5.35919	3.6221	11.8005
MGLibA_17268	Fam169a	27.9737	329.59	336.856	33.0414
MGLibA_23168	Gsta4	25.0007	5.35919	10.8663	9.4404
MGLibB_23040	Grm6	9.86513	5.35919	9.05526	4.7202
MGLibB_28224	Krtap5-2	11.0814	152.737	88.7416	9.4404
MGLibA_38976	Ormdl1	89.7321	83.0674	88.7416	54.2823
MGLibA_37702	Olfr549	56.488	26.7959	36.221	23.601
MGLibA_62833	mmu-mir-543	39.3254	29.4755	59.7647	30.6813
MGLibB_09592	Cdkl5	27.8386	16.0776	30.7879	33.0414
MGLibB_12802	Cyp2c66	5.00013	2.67959	9.05526	0
MGLibA_09867	Cep152	75.4074	61.6306	99.6079	106.205
MGLibA_02036	AA792892	17.568	1704.22	898.282	21.2409
MGLibB_33824	Nexn	62.9747	136.659	41.6542	82.6035
MGLibA_02042	AA987161	159.869	4482.96	2754.61	3474.07
MGLibA_50557	Sorbs3	29.0548	158.096	19.9216	9.4404
MGLibB_23130	Gsk3b	8.51374	356.386	45.2763	4.7202
MGLibB_46568	Rsbn1l	45.1363	37.5143	61.5758	49.5621
MGLibA_46361	Rps15a	14.3247	913.741	901.904	108.565
MGLibB_25028	Hspa4l	12.8382	8.03878	3.6221	9.4404
MGLibB_58214	Vmn1r214	9.59485	112.543	14.4884	11.8005
MGLibB_55982	Troap	4.1893	5.35919	3.6221	9.4404
MGLibA_56390	Ttc22	69.7316	471.608	77.8752	54.2823
MGLibB_26406	Isoc2b	28.9197	10.7184	21.7326	7.0803
MGLibA_47330	Scn5a	63.5152	4319.5	3891.95	4569.16
MGLibA_20633	Gm13283	7.70291	5.35919	5.43316	2.3601
MGLibA_61460	Zfpl1	103.381	83.0674	99.6079	153.407
MGLibA_49501	Slc43a2	26.2169	29.4755	30.7879	9.4404
MGLibA_49991	Smarcad1	117.976	1004.85	675.523	594.746
MGLibA_30990	Metap1	7.02722	5.35919	16.2995	0
MGLibA_29949	M6pr	30.5414	16.0776	10.8663	23.601
MGLibA_59261	Wdr1	16.6221	0	10.8663	4.7202
MGLibA_52706	Tarm1	13.3787	10.7184	10.8663	2.3601
MGLibB_41423	Plekhf1	0.810833	0	1.81105	2.3601
MGLibA_47831	Serpina3g	16.2167	16.0776	23.5437	11.8005
MGLibB_48295	Sh3glb2	62.1638	50.9123	52.5205	87.3237
MGLibB_09624	Cdnf	22.0276	13.398	25.3547	18.8808
MGLibB_45727	Rnasek	19.5951	10.7184	19.9216	51.9222
MGLibB_01659	5730409E04Rik	21.4871	0	1.81105	4.7202
MGLibB_12481	Cul5	0.675694	0	1.81105	0
MGLibB_44463	Ranbp2	28.7846	21.4367	36.221	35.4015
MGLibA_43442	Psmc5	49.1905	112.543	28.9768	33.0414
MGLibB_06300	BC028528	32.0279	37.5143	38.0321	51.9222
MGLibB_43761	Ptpra	10.4057	40.1939	9.05526	0
MGLibA_58758	Vmn2r4	37.5686	2609.92	2156.96	6008.82
MGLibB_05607	Atf7ip2	28.3791	32.1551	34.41	59.0025
MGLibA_34044	Nipa2	37.2983	50.9123	34.41	28.3212
MGLibA_09291	Cdc14a	58.5151	351.027	95.9858	40.1217
MGLibB_15337	Eaf2	38.5145	26.7959	28.9768	25.9611
MGLibA_63657	mmu-mir-7216	24.7304	16.0776	14.4884	33.0414
MGLibB_44174	Rab38	8.64888	13.398	3.6221	4.7202
MGLibB_00064	1110001J03Rik	34.055	24.1163	16.2995	33.0414
MGLibA_14291	Dll1	0.810833	0	0	0
MGLibB_59832	Yaf2	77.1642	1701.54	1394.51	1482.14
MGLibA_56029	Trp53rk	12.0273	450.172	12.6774	14.1606
MGLibB_45248	Rgcc	25.8115	1296.92	1488.68	2756.6
MGLibB_28365	Lag3	19.46	24.1163	16.2995	42.4818
MGLibB_23676	Hand1	9.18944	0	1.81105	2.3601
MGLibB_05786	Atp2c1	56.0826	1487.17	1707.82	3065.77
MGLibA_40085	Pdcl	12.2976	10.7184	1.81105	35.4015
MGLibA_35875	Olfr116	70.5424	1731.02	1207.97	816.595
MGLibB_31328	Miip	74.8669	238.484	85.1195	110.925
MGLibA_64676	mmu-mir-302c	63.9206	24.1163	19.9216	25.9611
MGLibA_42413	Ppp2r3a	71.3533	50.9123	103.23	49.5621
MGLibB_21533	Gm5087	28.1089	21.4367	38.0321	37.7616
MGLibA_02909	Adad1	35.0009	24.1163	45.2763	49.5621
MGLibB_25620	Igsf3	5.00013	0	9.05526	0
MGLibB_44400	Rag2	18.6491	0	21.7326	9.4404
MGLibB_12382	Ctsc	21.6222	18.7572	5.43316	11.8005
MGLibB_15510	Eea1	8.64888	8.03878	16.2995	11.8005
MGLibB_39661	Pcbd1	43.6498	34.8347	52.5205	68.4429
MGLibA_33621	Ndufs1	30.4062	24.1163	38.0321	37.7616
MGLibA_54316	Tmem132b	70.4073	117.902	50.7095	56.6424
MGLibA_34788	Nrn1	64.3261	101.825	74.2531	92.0439
MGLibA_04379	Ano3	29.0548	10.7184	27.1658	37.7616
MGLibA_22337	Golim4	47.1634	1034.32	1150.02	1175.33
MGLibA_15489	Edem1	14.4598	99.1449	10.8663	9.4404
MGLibA_01894	9930013L23Rik	325.009	1144.19	1059.47	349.295
MGLibA_58646	Vmn2r16	19.0546	10.7184	9.05526	37.7616
MGLibA_63118	mmu-mir-3075	12.1625	8.03878	7.24421	14.1606
MGLibA_37000	Olfr248	41.2173	13.398	16.2995	11.8005
MGLibB_14871	Dr1	52.2987	50.9123	63.3868	80.2434
MGLibA_26720	Jph4	2.97305	0	3.6221	7.0803
MGLibB_46720	Rundc3a	44.1904	26.7959	34.41	42.4818
MGLibB_61621	Zmynd8	43.6498	85.747	10.8663	18.8808
MGLibA_52430	Syt7	71.8938	40.1939	85.1195	28.3212
MGLibA_47417	Scyl3	17.7032	5.35919	14.4884	21.2409
MGLibA_50019	Smc1a	9.59485	5.35919	5.43316	7.0803
MGLibB_01280	4930452B06Rik	1.62167	5.35919	0	7.0803
MGLibB_12147	Csnk2a1	23.5141	16.0776	10.8663	30.6813
MGLibA_58580	Vmn2r108	50.5419	2977.03	945.369	946.401
MGLibA_20999	Gm16532	33.5144	24.1163	32.5989	30.6813
MGLibB_44830	Rbm4	54.5961	123.261	34.41	56.6424
MGLibA_33752	Nelfe	40.6768	10.7184	32.5989	28.3212
MGLibA_12149	Csnk1g3	35.0009	34.8347	25.3547	87.3237
MGLibB_13010	Cypt3	49.0554	838.713	318.745	56.6424
MGLibB_00077	1110008F13Rik	20.0005	2.67959	7.24421	11.8005
MGLibA_43385	Psma6	17.4329	5.35919	10.8663	4.7202
MGLibA_36564	Olfr1428	108.246	225.086	81.4974	115.645
MGLibA_63498	mmu-mir-1306	67.0288	26.7959	81.4974	77.8833
MGLibB_14844	Dpy19l4	13.5139	123.261	5.43316	2.3601
MGLibB_00819	2310045N01Rik	27.5683	8.03878	14.4884	11.8005
MGLibB_11976	Crtc1	6.75694	24.1163	9.05526	7.0803
MGLibA_38207	Olfr739	61.353	42.8735	39.8432	49.5621
MGLibB_04969	Arhgap4	3.64875	5.35919	3.6221	7.0803
MGLibA_63908	mmu-mir-6989	7.97319	13.398	7.24421	2.3601
MGLibB_59958	Yy1	65.6774	351.027	257.169	89.6838
MGLibB_29511	Lrrc61	40.5416	8.03878	16.2995	28.3212
MGLibA_18539	Fktn	63.6504	40.1939	56.1426	80.2434
MGLibB_09320	Cdc26	9.59485	0	3.6221	21.2409
MGLibA_01078	3110082J24Rik	15.1355	8.03878	7.24421	9.4404
MGLibB_52386	Syt14	8.10833	8.03878	9.05526	14.1606
MGLibB_48515	Sipa1	6.75694	0	0	0
MGLibA_62203	mmu-mir-3058	41.3525	3794.3	630.246	40.1217
MGLibA_04638	Aplp1	59.8665	45.5531	67.0089	70.803
MGLibA_29322	Lrit1	6.6218	0	7.24421	16.5207
MGLibA_44596	Rasd2	44.7309	128.62	54.3316	14.1606
MGLibA_27520	Klf3	109.598	72.349	74.2531	94.404
MGLibA_22708	Gpr34	45.6769	42.8735	52.5205	61.3626
MGLibB_10792	Clic3	26.6223	7036.61	6583.18	20030.2
MGLibB_56284	Tsr1	18.2437	24.1163	16.2995	16.5207
MGLibA_56135	Try5	68.1099	2695.67	901.904	250.171
MGLibA_17429	Fam20b	15.541	8.03878	5.43316	11.8005
MGLibB_44122	Rab24	20.5411	5.35919	14.4884	11.8005
MGLibB_26816	Kbtbd12	52.7041	270.639	268.036	1522.27
MGLibB_52647	Tanc1	98.6513	219.727	170.239	87.3237
MGLibA_24059	Hexdc	87.4348	758.325	516.15	56.6424
MGLibA_43259	Prss54	19.46	16.0776	12.6774	14.1606
MGLibA_47310	Scn1b	75.002	527.88	199.216	66.0828
MGLibB_45685	Rmnd5a	12.0273	18.7572	10.8663	7.0803
MGLibA_65356	mmu-mir-3099	40.4065	34.8347	45.2763	66.0828
MGLibB_29801	Ly6k	0.270278	2.67959	3.6221	0
MGLibB_40741	Phlda3	0.135139	2.67959	0	0
MGLibB_30654	Mcm5	19.3248	18.7572	14.4884	0
MGLibA_38179	Olfr729	14.0544	2.67959	10.8663	11.8005
MGLibA_19592	Gbp8	39.3254	214.367	30.7879	30.6813
MGLibA_01743	2016-03-06	39.7308	40.1939	25.3547	59.0025
MGLibB_03628	Akap5	16.4869	321.551	9.05526	4.7202
MGLibA_27064	Kcnmb1	56.8934	5.35919	14.4884	21.2409
MGLibA_14607	Dnase2b	23.9196	10.7184	12.6774	16.5207
MGLibB_33312	Nbeal1	6.89208	8.03878	10.8663	7.0803
MGLibA_34353	Nodal	2.83791	2.67959	3.6221	7.0803
MGLibB_46478	Rpusd3	22.1628	10.7184	23.5437	16.5207
MGLibB_08623	Ccdc69	108.516	1061.12	528.827	240.73
MGLibA_39971	Pcnxl2	31.2171	16.0776	16.2995	23.601
MGLibB_48462	Siglec5	54.4609	53.5919	57.9537	56.6424
MGLibB_54283	Tmem128	31.7576	61.6306	32.5989	33.0414
MGLibB_14697	Dok1	55.1366	26.7959	57.9537	54.2823
MGLibA_52684	Taok3	5.81097	2.67959	7.24421	0
MGLibA_05190	Armc1	91.3538	109.863	83.3084	68.4429
MGLibB_25382	Ifitm1	16.7572	8.03878	21.7326	21.2409
MGLibA_24511	Hmgxb3	29.8657	16.0776	18.1105	63.7227
MGLibA_53710	Thbs1	67.0288	305.474	141.262	243.09
MGLibB_10633	Cldn18	25.1358	10.7184	9.05526	9.4404
MGLibB_48274	Sh3bp5	70.5424	32.1551	76.0642	61.3626
MGLibA_26869	Kcna7	16.7572	2.67959	5.43316	4.7202
MGLibA_52511	Tab1	62.7044	48.2327	45.2763	80.2434
MGLibB_38609	Olfr916	41.2173	235.804	36.221	49.5621
MGLibA_31165	Mfsd3	56.7583	45.5531	52.5205	68.4429
MGLibB_22126	Gmfg	3.37847	0	0	4.7202
MGLibA_26222	Iqcd	68.1099	24.1163	25.3547	56.6424
MGLibB_36797	Olfr165	33.3793	37.5143	41.6542	37.7616
MGLibA_22331	Golga7	15.2707	58.9511	18.1105	2.3601
MGLibB_43457	Psmd3	0.810833	2.67959	1.81105	0
MGLibB_50472	Snx8	74.056	26.7959	36.221	30.6813
MGLibB_03092	Adap1	21.7573	0	9.05526	0
MGLibB_19301	Gabrr3	55.1366	32.1551	36.221	44.8419
MGLibA_28464	Laptm4b	116.895	1117.39	939.936	1293.34
MGLibA_63053	mmu-mir-27b	22.1628	2893.96	3006.35	5834.17
MGLibA_44458	Ramp1	219.06	683.296	679.145	245.451
MGLibA_30899	Mef2d	15.0004	13.398	5.43316	14.1606
MGLibA_26583	Itpr1	47.8391	40.1939	36.221	42.4818
MGLibB_32482	Mtl5	11.2165	64.3102	10.8663	4.7202
MGLibA_54858	Tmem71	15.541	8.03878	19.9216	4.7202
MGLibA_01415	4930568D16Rik	22.9736	24.1163	32.5989	42.4818
MGLibB_38879	Opa3	18.9194	8.03878	7.24421	9.4404
MGLibB_61652	Znrf3	90.2727	101.825	70.631	99.1243
MGLibB_25970	Impact	0	0	0	4.7202
MGLibB_13443	Dcpp3	7.29749	5.35919	16.2995	18.8808
MGLibB_39391	Palm	4.45958	2.67959	0	9.4404
MGLibA_16256	Eogt	52.4338	34.8347	61.5758	56.6424
MGLibA_17593	Fam53c	0.135139	0	0	0
MGLibA_18834	Foxo3	21.2168	5.35919	18.1105	11.8005
MGLibB_43991	Pzp	3.64875	2.67959	9.05526	7.0803
MGLibA_01435	4930591A17Rik	144.058	45.5531	99.6079	113.285
MGLibB_09128	Cd300lf	34.055	24.1163	21.7326	75.5232
MGLibA_52861	Tbc1d10a	34.3252	316.192	101.419	44.8419
MGLibA_11828	Crb3	36.7577	359.065	79.6863	42.4818
MGLibB_22000	Gm853	5.81097	243.843	0	0
MGLibB_19477	Gas2l1	41.7579	64.3102	23.5437	21.2409
MGLibB_22353	Gorab	20.0005	18.7572	25.3547	28.3212
MGLibA_11983	Crtc3	15.9464	273.319	115.907	40.1217
MGLibB_08276	Ccar1	10.2705	107.184	7.24421	0
MGLibB_28087	Krt84	14.7301	8.03878	7.24421	2.3601
MGLibA_54829	Tmem63a	0.270278	0	1.81105	2.3601
MGLibA_43315	Psen1	224.33	1197.78	1030.49	3261.66
MGLibB_50714	Spag4	133.923	380.502	264.414	127.445
MGLibB_15553	Efcab12	35.4064	18.7572	21.7326	40.1217
MGLibB_38708	Olfr960	59.4611	45.5531	68.82	82.6035
MGLibA_61661	Znrd1as	73.5155	109.863	81.4974	84.9636
MGLibA_15916	Elane	55.9474	691.335	523.394	82.6035
MGLibB_23930	Heatr6	14.0544	2.67959	9.05526	9.4404
MGLibB_28657	Ldb1	24.325	21.4367	19.9216	28.3212
MGLibB_03558	Aipl1	56.0826	45.5531	72.4421	99.1243
MGLibA_33534	Ndufa2	21.3519	2.67959	18.1105	21.2409
MGLibA_06886	Bicd2	74.5966	10.7184	38.0321	56.6424
MGLibA_57385	Upk1a	38.5145	21.4367	32.5989	14.1606
MGLibB_30007	Maf	19.3248	198.29	95.9858	2395.5
MGLibA_06969	Bmp10	58.1097	53.5919	67.0089	63.7227
MGLibB_51544	St3gal6	32.4333	26.7959	41.6542	54.2823
MGLibB_16050	Emc7	15.541	8.03878	21.7326	21.2409
MGLibB_28898	Lhx9	49.5959	24.1163	43.4653	61.3626
MGLibB_39999	Pcsk5	31.3522	10.7184	18.1105	33.0414
MGLibA_61313	Zfp871	21.3519	16.0776	18.1105	11.8005
MGLibA_39754	Pcdha4	67.5694	48.2327	112.285	66.0828
MGLibB_20062	Glcci1	21.7573	32.1551	39.8432	9.4404
MGLibA_45587	Rimbp3	52.1636	308.153	137.64	54.2823
MGLibA_23314	Gtpbp3	23.7844	16.0776	28.9768	25.9611
MGLibA_42256	Ppox	108.922	171.494	150.317	118.005
MGLibA_31998	Mrpl13	4.59472	0	7.24421	9.4404
MGLibA_56721	Txndc15	32.7036	48.2327	12.6774	33.0414
MGLibA_10003	Ces2c	8.51374	0	12.6774	18.8808
MGLibB_51345	Srrm3	17.4329	13.398	25.3547	11.8005
MGLibB_28095	Krt86	55.2718	34.8347	74.2531	54.2823
MGLibB_21673	Gm5635	25.1358	8.03878	19.9216	47.202
MGLibA_54444	Tmem177	92.0295	621.666	369.455	92.0439
MGLibB_38747	Olfr976	18.1086	13.398	12.6774	9.4404
MGLibA_25208	I830012O16Rik	29.5954	24.1163	12.6774	25.9611
MGLibB_35285	Oasl1	3.24333	8.03878	1.81105	2.3601
MGLibA_41519	Plk1s1	132.436	174.174	152.128	165.207
MGLibB_59447	Wfdc15b	55.1366	64.3102	48.8984	54.2823
MGLibA_66370	mmu-mir-764	19.0546	18.7572	18.1105	16.5207
MGLibB_27020	Kcnk15	18.2437	50.9123	19.9216	30.6813
MGLibA_26649	Jagn1	93.2457	187.572	124.963	87.3237
MGLibB_18766	Foxf1	7.97319	2.67959	3.6221	0
MGLibA_48591	Ska1	7.16235	10.7184	1.81105	2.3601
MGLibB_55019	Tmtc4	8.24346	8.03878	10.8663	37.7616
MGLibA_04815	Arap1	25.8115	13.398	19.9216	37.7616
MGLibB_23366	Gucy2g	31.8927	34.8347	19.9216	28.3212
MGLibA_50383	Sntb2	164.464	747.607	168.428	1316.94
MGLibA_09338	Cdc42bpa	40.2714	200.969	239.059	33.0414
MGLibA_11150	Cnst	154.599	128.62	148.506	165.207
MGLibB_07318	Btf3l4	2.70278	2.67959	9.05526	0
MGLibB_31783	Mpo	17.1626	2.67959	0	0
MGLibA_37148	Olfr315	19.0546	18.7572	7.24421	14.1606
MGLibB_03770	Aldh1l2	27.5683	184.892	150.317	18.8808
MGLibA_00581	1700112E06Rik	42.5687	91.1062	47.0874	59.0025
MGLibB_20932	Gm156	99.8675	176.853	186.538	141.606
MGLibA_30685	Mcoln2	49.5959	21.4367	28.9768	42.4818
MGLibA_12167	Cspg5	64.0558	48.2327	34.41	54.2823
MGLibB_23552	H2-Q1	40.5416	24.1163	47.0874	54.2823
MGLibA_16487	Ereg	160.815	450.172	474.496	3780.88
MGLibB_60216	Zcchc24	13.7842	18.7572	12.6774	25.9611
MGLibB_57511	Usp17ld	34.055	442.133	34.41	33.0414
MGLibA_19861	Ggt5	9.32457	0	0	2.3601
MGLibA_67152	NonTargetingControlGuideForMouse_0747	70.8127	37.5143	67.0089	49.5621
MGLibB_27353	Kif20a	35.5415	26.7959	41.6542	21.2409
MGLibA_50832	Spata6	1.89194	2.67959	1.81105	11.8005
MGLibA_12560	Cxcl16	101.895	56.2715	59.7647	56.6424
MGLibB_14494	Dnajc11	24.325	21.4367	28.9768	42.4818
MGLibA_37552	Olfr488	67.7045	367.104	239.059	70.803
MGLibA_60873	Zfp526	50.2716	152.737	41.6542	56.6424
MGLibB_00858	2410012M07Rik	19.46	21.4367	34.41	35.4015
MGLibA_05961	Atpif1	13.5139	10.7184	16.2995	2.3601
MGLibA_30928	Meiob	9.0543	2.67959	9.05526	11.8005
MGLibB_24944	Hsd3b1	33.5144	58.9511	52.5205	23.601
MGLibA_53069	Tcea2	32.7036	42.8735	41.6542	18.8808
MGLibA_14915	Drg2	45.812	442.133	36.221	63.7227
MGLibB_10818	Clk1	34.4604	24.1163	23.5437	35.4015
MGLibA_47444	Sdccag8	39.3254	21.4367	19.9216	35.4015
MGLibB_56667	Twist2	1.7568	0	0	2.3601
MGLibA_28448	Lancl2	66.0829	45.5531	86.9305	61.3626
MGLibA_58641	Vmn2r14	10.1354	2.67959	12.6774	16.5207
MGLibB_51823	Stoml1	127.03	142.018	117.718	103.844
MGLibA_43200	Prss33	35.1361	107.184	43.4653	16.5207
MGLibA_10449	Cib3	37.5686	29.4755	32.5989	16.5207
MGLibA_46205	Rpl27a	3.64875	0	0	14.1606
MGLibB_56439	Ttc4	10.9462	2.67959	7.24421	16.5207
MGLibB_24092	Hhatl	14.3247	8.03878	12.6774	21.2409
MGLibB_25707	Il12rb2	9.0543	21.4367	5.43316	0
MGLibA_55559	Traf6	104.462	2092.76	1890.74	155.767
MGLibA_66070	mmu-mir-501	50.5419	75.0286	38.0321	33.0414
MGLibB_08139	Casr	122.165	273.319	143.073	113.285
MGLibB_13472	Dctn5	4.32444	8.03878	3.6221	7.0803
MGLibA_26888	Kcnc1	19.0546	5.35919	1.81105	7.0803
MGLibB_27904	Kpna2	14.0544	18.7572	16.2995	11.8005
MGLibA_27275	Keap1	79.1913	718.131	177.483	70.803
MGLibA_59913	Yipf7	71.3533	254.561	186.538	118.005
MGLibB_23725	Haus1	0.270278	0	0	0
MGLibA_58435	Vmn1r5	132.977	192.931	135.829	148.686
MGLibA_53513	Tex40	33.5144	42.8735	39.8432	61.3626
MGLibA_64012	mmu-mir-5623	34.3252	18.7572	32.5989	30.6813
MGLibB_00481	1700037H04Rik	53.9204	58.9511	72.4421	49.5621
MGLibA_04300	Ankrd45	19.5951	5.35919	1.81105	11.8005
MGLibA_36563	Olfr1428	31.4873	1246.01	1197.11	1616.67
MGLibA_01170	4921536K21Rik	81.3535	115.223	79.6863	118.005
MGLibB_13608	Ddx31	9.72999	2.67959	3.6221	0
MGLibB_29324	Lrp10	60.5422	648.462	543.316	2433.26
MGLibB_32016	Mrpl21	15.1355	32.1551	30.7879	4.7202
MGLibB_02800	Actc1	10.8111	0	5.43316	11.8005
MGLibB_36593	Olfr1445	22.433	10.7184	25.3547	16.5207
MGLibA_03426	Agpat2	24.1898	16.0776	41.6542	21.2409
MGLibA_14378	Dmrtc2	46.3526	66.9898	39.8432	47.202
MGLibB_31869	Mre11a	20.8114	24.1163	7.24421	14.1606
MGLibB_34037	Nipal1	0.405416	0	0	0
MGLibA_61929	mmu-mir-149	11.3517	5.35919	10.8663	4.7202
MGLibA_16980	Fabp6	97.0296	80.3878	76.0642	33.0414
MGLibA_63911	mmu-mir-6989	41.6227	21.4367	39.8432	47.202
MGLibB_48626	Skint9	53.515	29.4755	47.0874	75.5232
MGLibA_11404	Colq	17.7032	305.474	10.8663	0
MGLibB_58200	Vmn1r20	162.707	187.572	150.317	158.127
MGLibB_42991	Prpf31	48.7851	369.784	224.57	103.844
MGLibA_32177	Mrps27	5.81097	0	5.43316	0
MGLibB_57351	Upf1	9.32457	0	9.05526	11.8005
MGLibB_52750	Tas2r117	20.0005	24.1163	28.9768	35.4015
MGLibB_12364	Cts3	18.3789	10.7184	27.1658	30.6813
MGLibB_46406	Rps2	7.02722	2.67959	1.81105	7.0803
MGLibA_09334	Cdc40	62.8395	937.858	624.813	108.565
MGLibB_22912	Greb1l	25.5412	329.59	25.3547	33.0414
MGLibA_44945	Rchy1	50.0013	139.339	50.7095	51.9222
MGLibA_02511	Acaa1a	198.654	1446.98	787.808	1017.2
MGLibB_50488	Socs2	65.8126	50.9123	68.82	61.3626
MGLibA_01496	4932416K20Rik	26.3521	214.367	18.1105	7.0803
MGLibB_05934	Atp8b1	93.6512	91.1062	139.451	127.445
MGLibB_10147	Chchd7	58.6502	45.5531	25.3547	35.4015
MGLibA_07165	Brd7	177.032	980.731	123.152	106.205
MGLibA_50088	Smgc	55.2718	80.3878	59.7647	49.5621
MGLibB_33351	Ncapg	29.7305	16.0776	16.2995	40.1217
MGLibA_19415	Galntl6	8.51374	2.67959	14.4884	21.2409
MGLibA_33647	Ndufv2	67.5694	69.6694	65.1979	42.4818
MGLibA_23480	H2-Bl	56.7583	29.4755	61.5758	42.4818
MGLibA_07717	Cacng4	48.7851	1077.2	905.526	5229.98
MGLibA_28169	Krtap2-4	80.0021	176.853	141.262	82.6035
MGLibB_12460	Cuedc1	10.4057	37.5143	0	0
MGLibB_38648	Olfr933	10.9462	5.35919	1.81105	0
MGLibB_35653	Olfr1087	13.3787	66.9898	10.8663	9.4404
MGLibA_31344	Mill2	46.2175	4081.02	3004.54	2067.45
MGLibB_38771	Olfr984	50.8122	2907.36	2950.2	9648.09
MGLibB_43025	Prph2	23.7844	227.765	54.3316	16.5207
MGLibB_08144	Cass4	28.6494	16.0776	27.1658	35.4015
MGLibB_36151	Olfr1276	23.1087	2971.67	3125.88	1954.16
MGLibB_34654	Nr1i3	6.6218	5.35919	7.24421	9.4404
MGLibB_37295	Olfr381	14.0544	10.7184	16.2995	4.7202
MGLibA_12565	Cxcl1	67.9748	88.4266	99.6079	66.0828
MGLibA_26544	Itih3	66.218	115.223	101.419	89.6838
MGLibB_03764	Aldh1b1	17.2978	8.03878	3.6221	0
MGLibB_48062	Sf3b4	13.7842	5.35919	10.8663	25.9611
MGLibB_35119	Nup43	5.81097	5.35919	1.81105	2.3601
MGLibA_64622	mmu-mir-92b	19.3248	16.0776	18.1105	14.1606
MGLibB_41162	Pklr	8.78402	80.3878	7.24421	4.7202
MGLibA_27542	Klhdc10	57.434	166.135	117.718	96.7642
MGLibA_39923	Pcgf2	127.706	651.141	407.487	1111.61
MGLibB_36335	Olfr1342	71.6235	58.9511	63.3868	87.3237
MGLibB_48869	Slc1a4	19.8654	1079.88	805.918	1239.05
MGLibA_06410	BC061194	6.75694	0	1.81105	4.7202
MGLibB_11405	Commd10	30.4062	24.1163	7.24421	25.9611
MGLibA_61893	mmu-mir-375	3.51361	2.67959	9.05526	0
MGLibB_35921	Olfr1196	39.8659	158.096	85.1195	63.7227
MGLibA_46983	Samt3	115.544	3108.33	3109.58	11286
MGLibA_42873	Prl8a9	66.3531	150.057	90.5526	28.3212
MGLibA_28374	Lag3	22.1628	136.659	9.05526	35.4015
MGLibA_50030	Smc4	23.7844	8.03878	25.3547	2.3601
MGLibA_24573	Hnrnpab	33.7847	16.0776	45.2763	56.6424
MGLibA_35857	Olfr1162	40.947	40.1939	61.5758	42.4818
MGLibA_50746	Spag9	51.4879	980.731	155.75	61.3626
MGLibA_48780	Slc15a4	13.1085	174.174	114.096	328.054
MGLibB_56080	Trpt1	22.9736	18.7572	54.3316	18.8808
MGLibB_14966	Dspp	29.8657	13.398	16.2995	11.8005
MGLibB_30386	Mapkapk5	40.5416	26.7959	54.3316	33.0414
MGLibA_09482	Cdhr1	99.4621	3293.22	1305.77	1390.1
MGLibB_54508	Tmem200a	2.83791	5.35919	5.43316	4.7202
MGLibA_03142	Adcy3	24.7304	2.67959	3.6221	7.0803
MGLibA_19071	Fuom	3.78389	0	5.43316	0
MGLibB_18237	Fev	15.8112	0	1.81105	7.0803
MGLibA_66320	mmu-mir-384	40.0011	18.7572	21.7326	25.9611
MGLibB_22767	Gpr82	8.24346	2.67959	0	2.3601
MGLibA_51101	Spred2	69.8667	943.217	972.535	4621.08
MGLibA_35579	Olfr1042	90.2727	56.2715	101.419	106.205
MGLibA_07200	Brinp3	49.7311	455.531	257.169	2888.76
MGLibB_40781	Phtf2	17.0275	18.7572	21.7326	16.5207
MGLibA_35215	Nxpe4	2.02708	0	0	9.4404
MGLibB_48098	Sfrs18	11.6219	0	5.43316	14.1606
MGLibA_16815	Exoc6b	113.381	988.77	632.057	1298.06
MGLibA_11279	Col16a1	70.137	26.7959	43.4653	49.5621
MGLibA_19711	Gdf5	53.2447	18.7572	23.5437	35.4015
MGLibB_07770	Calca	80.6778	814.596	563.237	89.6838
MGLibA_26922	Kcne4	5.81097	5.35919	5.43316	2.3601
MGLibA_49014	Slc25a14	22.433	29.4755	16.2995	21.2409
MGLibB_42003	Por	21.2168	5.35919	7.24421	30.6813
MGLibA_62478	mmu-mir-301a	41.4876	42.8735	30.7879	61.3626
MGLibA_37043	Olfr273	3.37847	8.03878	0	0
MGLibA_21787	Gm609	79.0562	88.4266	74.2531	56.6424
MGLibA_64689	mmu-mir-367	55.1366	426.055	315.123	726.911
MGLibA_17933	Fbxl6	33.109	8.03878	30.7879	11.8005
MGLibA_25251	Icam5	63.1098	24.1163	56.1426	42.4818
MGLibB_52967	Tbl1x	2.70278	5.35919	0	2.3601
MGLibB_60895	Zfp568	44.1904	471.608	380.321	59.0025
MGLibA_07819	Caln1	26.0818	16.0776	27.1658	28.3212
MGLibA_13173	D6Wsu163e	22.0276	490.366	18.1105	33.0414
MGLibA_20439	Gm11595	30.2711	18.7572	45.2763	28.3212
MGLibB_12090	Csf3r	5.40555	34.8347	5.43316	14.1606
MGLibB_33929	Nfyc	50.4068	24.1163	36.221	30.6813
MGLibA_15477	Eda	53.1095	5.35919	10.8663	23.601
MGLibB_46695	Rtp3	49.1905	125.941	52.5205	49.5621
MGLibB_45924	Rnf222	3.91902	2.67959	3.6221	0
MGLibA_11349	Col5a2	18.1086	8.03878	18.1105	7.0803
MGLibB_37865	Olfr613	17.1626	18.7572	19.9216	4.7202
MGLibA_45149	Retn	61.7584	24.1163	34.41	40.1217
MGLibB_17561	Fam46d	6.21638	2.67959	1.81105	0
MGLibA_09914	Cep68	60.6773	1709.58	610.325	101.484
MGLibA_45939	Rnf223	63.2449	123.261	68.82	61.3626
MGLibA_19372	Galnt13	14.7301	10.7184	5.43316	7.0803
MGLibA_66962	NonTargetingControlGuideForMouse_0557	17.4329	5.35919	14.4884	7.0803
MGLibA_34559	Npm3	43.785	75.0286	61.5758	84.9636
MGLibA_26691	Jmjd4	27.0278	16.0776	14.4884	28.3212
MGLibA_54362	Tmem14c	70.5424	198.29	124.963	40.1217
MGLibA_14969	Dsn1	9.45971	0	5.43316	11.8005
MGLibA_17771	Fancl	80.6778	48.2327	61.5758	80.2434
MGLibA_60165	Zc3h12c	14.595	1288.88	1068.52	9506.49
MGLibA_35438	Oip5	124.868	1406.79	671.9	139.246
MGLibA_24618	Hnrnpu	0.405416	0	0	0
MGLibB_59591	Wnt7a	50.9473	48.2327	47.0874	87.3237
MGLibB_29861	Lypla2	1.89194	0	0	0
MGLibA_15773	Eif2a	79.5967	136.659	90.5526	82.6035
MGLibA_14471	Dnajb1	5.67583	50.9123	21.7326	11.8005
MGLibB_47113	Scamp1	64.8666	168.814	141.262	854.357
MGLibA_01108	4632428N05Rik	25.8115	77.7082	41.6542	47.202
MGLibB_05758	Atp1b3	15.6761	8.03878	10.8663	11.8005
MGLibB_57707	Uxt	20.8114	18.7572	16.2995	16.5207
MGLibA_54793	Tmem52	56.488	37.5143	27.1658	42.4818
MGLibB_53151	Tcirg1	27.4332	26.7959	21.7326	16.5207
MGLibB_18580	Flt3	47.4337	32.1551	28.9768	21.2409
MGLibA_53847	Tifa	15.2707	5.35919	1.81105	2.3601
MGLibA_03296	Adrm1	50.8122	58.9511	38.0321	37.7616
MGLibA_17993	Fbxo34	1.48653	2.67959	1.81105	4.7202
MGLibA_24638	Hook2	13.7842	5.35919	10.8663	7.0803
MGLibB_34246	Nme2	6.48666	5.35919	1.81105	0
MGLibA_31789	Mpnd	299.332	3606.73	1492.31	19454.3
MGLibA_18579	Flrt3	56.488	45.5531	57.9537	80.2434
MGLibA_50906	Speer4e	31.2171	364.425	106.852	40.1217
MGLibA_13270	Dapl1	32.4333	21.4367	32.5989	25.9611
MGLibA_60658	Zfp35	85.9483	61.6306	90.5526	125.085
MGLibB_20197	Gltscr2	7.29749	0	7.24421	7.0803
MGLibA_65514	mmu-mir-344f	74.3263	26.7959	63.3868	40.1217
MGLibB_05714	Atp11a	57.1637	565.394	186.538	247.811
MGLibB_13318	Dbndd2	69.191	1034.32	32.5989	73.1631
MGLibA_24328	Hist1h3h	34.4604	785.121	12.6774	16.5207
MGLibA_23184	Gstm3	47.4337	37.5143	77.8752	70.803
MGLibB_50317	Snrnp48	14.3247	13.398	12.6774	35.4015
MGLibA_47535	Sec16a	4.45958	2.67959	1.81105	2.3601
MGLibA_22445	Gpbar1	51.2176	37.5143	36.221	47.202
MGLibA_07816	Calml4	24.325	24.1163	18.1105	30.6813
MGLibB_13815	Defb36	70.137	53.5919	72.4421	84.9636
MGLibB_33460	Ndel1	9.59485	5.35919	12.6774	2.3601
MGLibA_36747	Olfr150	13.3787	8.03878	14.4884	23.601
MGLibA_43815	Ptprn	1.35139	0	1.81105	0
MGLibB_61373	Zfp945	40.947	868.188	135.829	61.3626
MGLibB_48147	Sgcb	57.7043	45.5531	50.7095	21.2409
MGLibB_06720	Bcl6b	7.16235	2.67959	7.24421	0
MGLibB_03798	Aldh8a1	3.10819	5.35919	10.8663	9.4404
MGLibB_42189	Ppil4	8.10833	10.7184	9.05526	7.0803
MGLibB_17430	Fam210b	0.540555	0	0	0
MGLibA_55478	Tpra1	45.6769	308.153	79.6863	42.4818
MGLibA_05689	Atn1	34.1901	24.1163	47.0874	33.0414
MGLibA_06299	BC027231	36.3523	16.0776	18.1105	28.3212
MGLibB_05087	Arid4a	42.1633	3529.02	1457.9	4677.72
MGLibB_35237	Nynrin	20.6762	10.7184	19.9216	44.8419
MGLibB_48854	Slc19a2	17.7032	2.67959	9.05526	11.8005
MGLibA_06447	BC147527	24.4601	101.825	14.4884	47.202
MGLibA_12793	Cyp2c50	92.9755	249.202	56.1426	108.565
MGLibA_54716	Tmem29	16.3518	16.0776	9.05526	7.0803
MGLibA_23492	H2-DMb2	39.5957	83.0674	57.9537	37.7616
MGLibA_45724	Rnase9	67.7045	40.1939	70.631	84.9636
MGLibB_21339	Gm382	48.3797	32.1551	63.3868	70.803
MGLibB_29215	Lpcat3	15.8112	16.0776	9.05526	16.5207
MGLibB_37864	Olfr613	16.7572	8.03878	1.81105	14.1606
MGLibB_23456	H1fnt	10.1354	5.35919	3.6221	4.7202
MGLibA_00290	1700011L22Rik	65.6774	40.1939	34.41	33.0414
MGLibA_54912	Tmem91	54.5961	37.5143	43.4653	70.803
MGLibA_48559	Sirt6	141.625	409.978	148.506	184.088
MGLibB_55830	Trim56	26.6223	24.1163	19.9216	14.1606
MGLibA_16880	Eya2	12.0273	24.1163	9.05526	16.5207
MGLibB_29665	Lsmd1	26.2169	10.7184	18.1105	16.5207
MGLibB_55410	Tpgs2	36.4875	37.5143	34.41	59.0025
MGLibB_13246	Dalrd3	5.27041	5.35919	3.6221	4.7202
MGLibA_58674	Vmn2r24	58.2448	32.1551	54.3316	35.4015
MGLibB_18853	Foxr2	19.5951	259.921	338.667	11.8005
MGLibA_62249	mmu-mir-6914	17.568	267.959	179.294	3280.54
MGLibA_47170	Sccpdh	54.3258	844.072	688.2	134.526
MGLibA_06741	Bclaf1	51.7581	56.2715	70.631	37.7616
MGLibB_34058	Nipsnap3b	30.9468	115.223	50.7095	54.2823
MGLibB_06848	Bglap	85.1374	77.7082	106.852	132.166
MGLibB_24915	Hsd17b11	28.1089	24.1163	30.7879	63.7227
MGLibB_22397	Gpa33	3.51361	5.35919	5.43316	4.7202
MGLibB_19655	Gcnt3	56.2177	34.8347	45.2763	66.0828
MGLibB_62631	NonTargetingControlGuideForMouse_0827	24.1898	10.7184	5.43316	11.8005
MGLibA_46852	S100a8	6.48666	16.0776	18.1105	9.4404
MGLibB_46752	Rwdd2a	44.3255	64.3102	74.2531	80.2434
MGLibA_23250	Gtf2e2	77.4345	321.551	103.23	106.205
MGLibB_60713	Zfp40	29.8657	16.0776	18.1105	16.5207
MGLibB_30454	Mast2	8.51374	2.67959	12.6774	0
MGLibA_02865	Actr8	50.1365	21.4367	65.1979	49.5621
MGLibB_50121	Smim9	24.7304	18.7572	10.8663	11.8005
MGLibB_17669	Fam78b	31.3522	26.7959	32.5989	30.6813
MGLibA_45763	Rnf10	68.2451	56.2715	43.4653	77.8833
MGLibA_62737	mmu-mir-431	54.5961	58.9511	72.4421	80.2434
MGLibA_33591	Ndufb2	35.2712	34.8347	21.7326	18.8808
MGLibB_59818	Xxylt1	25.0007	661.86	436.464	2593.75
MGLibB_44609	Rasgrp3	12.703	5.35919	25.3547	47.202
MGLibB_61533	Zkscan16	11.2165	64.3102	10.8663	4.7202
MGLibA_01680	5830415F09Rik	92.7052	994.129	289.768	1005.4
MGLibB_08583	Ccdc57	20.6762	123.261	14.4884	37.7616
MGLibB_25810	Il1rl1	4.1893	5.35919	1.81105	4.7202
MGLibB_55296	Tomm34	51.2176	1554.16	1025.06	4597.48
MGLibA_13480	Dctpp1	4.59472	0	5.43316	0
MGLibB_08390	Ccdc13	45.2715	83.0674	59.7647	35.4015
MGLibB_04389	Ano7	7.02722	2.67959	1.81105	0
MGLibA_04821	Arap3	36.4875	37.5143	39.8432	21.2409
MGLibB_19371	Galnt15	47.2986	24.1163	45.2763	44.8419
MGLibB_17380	Fam196a	35.5415	5.35919	28.9768	16.5207
MGLibA_41573	Plscr3	34.8658	45.5531	28.9768	40.1217
MGLibB_31993	Mrpl15	30.9468	160.776	18.1105	25.9611
MGLibB_34393	Nop16	13.1085	5.35919	10.8663	4.7202
MGLibB_45007	Rec8	28.5143	115.223	25.3547	132.166
MGLibB_04774	Aptx	1.89194	286.716	143.073	368.176
MGLibB_10542	Cks1b	6.75694	10.7184	3.6221	4.7202
MGLibA_62723	mmu-mir-540	33.2441	26.7959	38.0321	44.8419
MGLibB_22197	Gnat3	29.8657	64.3102	27.1658	14.1606
MGLibA_05063	Arhgef7	40.6768	21.4367	25.3547	21.2409
MGLibB_57103	Uchl4	1.35139	0	3.6221	0
MGLibA_29291	Lrfn2	80.4076	463.57	536.071	228.93
MGLibA_15270	E130309D02Rik	18.9194	8.03878	7.24421	7.0803
MGLibA_15005	Dtwd1	16.7572	56.2715	10.8663	23.601
MGLibB_25937	Ilkap	42.7038	26.7959	50.7095	44.8419
MGLibA_57899	Vipr1	100.003	77.7082	43.4653	82.6035
MGLibA_19083	Fut11	83.1103	313.512	112.285	106.205
MGLibB_10041	Cfb	14.3247	2.67959	5.43316	11.8005
MGLibA_12736	Cyp26c1	0.135139	0	0	0
MGLibA_21462	Gm4794	29.4603	32.1551	27.1658	30.6813
MGLibB_34202	Nlrp4b	79.3265	58.9511	79.6863	87.3237
MGLibB_02448	Abhd3	19.5951	13.398	14.4884	4.7202
MGLibB_46489	Rraga	28.3791	34.8347	59.7647	23.601
MGLibA_33332	Nbl1	17.9735	10.7184	5.43316	23.601
MGLibB_02635	Acly	28.6494	13.398	30.7879	33.0414
MGLibB_60971	Zfp619	8.24346	5.35919	27.1658	14.1606
MGLibB_18528	Fkrp	57.1637	42.8735	25.3547	56.6424
MGLibA_09097	Cd27	40.5416	21.4367	36.221	14.1606
MGLibA_26885	Kcnb2	65.4072	34.8347	54.3316	49.5621
MGLibA_33066	Mzt1	5.81097	5.35919	5.43316	0
MGLibA_45629	Riok2	24.0547	29.4755	23.5437	21.2409
MGLibA_67328	NonTargetingControlGuideForMouse_0923	232.979	7264.38	1012.38	3863.49
MGLibA_09886	Cep250	11.4868	0	10.8663	2.3601
MGLibB_54153	Tmco1	6.89208	10.7184	12.6774	2.3601
MGLibB_22794	Gprasp1	76.6237	418.017	67.0089	96.7642
MGLibB_35676	Olfr1098	17.2978	26.7959	3.6221	11.8005
MGLibA_61783	Zswim8	47.0283	24.1163	32.5989	21.2409
MGLibB_27372	Kif24	22.8385	8.03878	14.4884	7.0803
MGLibA_05715	Atp11b	20.1357	77.7082	28.9768	33.0414
MGLibB_25060	Hspb7	49.0554	275.998	224.57	2652.75
MGLibB_15136	Dvl1	8.64888	2.67959	1.81105	0
MGLibA_36119	Olfr1260	232.844	168.814	132.207	212.409
MGLibB_53023	Tbx4	0.810833	0	0	0
MGLibB_17947	Fbxo17	47.5688	506.443	86.9305	1135.21
MGLibB_46773	Rxfp4	29.4603	37.5143	19.9216	25.9611
MGLibB_36746	Olfr1512	6.75694	10.7184	3.6221	9.4404
MGLibB_37347	Olfr402	9.0543	8.03878	3.6221	4.7202
MGLibA_52243	Swi5	65.4072	476.968	246.303	75.5232
MGLibA_17619	Fam65a	33.5144	32.1551	25.3547	30.6813
MGLibA_01245	4930432M17Rik	45.2715	64.3102	81.4974	80.2434
MGLibA_58387	Vmn1r45	35.2712	305.474	275.28	30.6813
MGLibB_36085	Olfr1253	27.7034	21.4367	23.5437	33.0414
MGLibA_13764	Defb13	45.2715	26.7959	10.8663	16.5207
MGLibB_24421	Hk3	48.2445	29.4755	57.9537	30.6813
MGLibB_16794	Exoc3l	22.0276	13.398	18.1105	11.8005
MGLibA_34953	Ntrk2	74.1912	72.349	92.3637	106.205
MGLibA_10396	Chst2	14.3247	61.6306	28.9768	18.8808
MGLibA_34523	Npffr1	69.5965	246.523	90.5526	125.085
MGLibA_07758	Cad	57.8394	26.7959	52.5205	51.9222
MGLibB_32411	Mtdh	21.0816	10.7184	16.2995	11.8005
MGLibB_55211	Tnni3	26.0818	34.8347	39.8432	14.1606
MGLibA_66874	NonTargetingControlGuideForMouse_0469	84.732	222.406	115.907	110.925
MGLibB_47309	Scn3b	12.1625	2.67959	9.05526	0
MGLibB_05043	Arhgef39	15.6761	8.03878	10.8663	25.9611
MGLibB_36671	Olfr1480	177.302	310.833	179.294	118.005
MGLibB_30536	Mbip	1.48653	0	3.6221	9.4404
MGLibB_19732	Gdpd3	25.8115	278.678	105.041	54.2823
MGLibA_53702	Thap7	72.2992	58.9511	39.8432	63.7227
MGLibB_52218	Svs5	1.89194	0	0	0
MGLibB_44509	Rap2c	3.37847	5.35919	12.6774	0
MGLibA_64774	mmu-mir-32	112.841	109.863	134.018	151.046
MGLibB_33263	Narg2	2.02708	2.67959	5.43316	0
MGLibB_09265	Cd93	133.112	436.774	501.661	620.707
MGLibA_62497	mmu-mir-196a-1	17.4329	2.67959	14.4884	21.2409
MGLibB_24204	Hist1h1c	33.9198	42.8735	39.8432	59.0025
MGLibA_09947	Cer1	46.4877	115.223	54.3316	47.202
MGLibB_18952	Frs2	39.4605	26.7959	30.7879	56.6424
MGLibB_23629	H60b	35.9469	1232.61	1131.91	9577.29
MGLibB_15072	Dusp19	15.1355	8.03878	14.4884	4.7202
MGLibB_09084	Cd248	71.8938	329.59	81.4974	113.285
MGLibA_07458	C1qtnf2	9.72999	2.67959	5.43316	14.1606
MGLibB_00786	2310022A10Rik	37.1632	152.737	28.9768	28.3212
MGLibA_35429	Ogg1	25.2709	34.8347	36.221	42.4818
MGLibB_09395	Cdca5	24.7304	93.7858	21.7326	11.8005
MGLibA_51874	Stra6	77.8399	69.6694	77.8752	84.9636
MGLibB_34968	Nubp2	19.46	10.7184	25.3547	14.1606
MGLibA_11792	Cpxm2	83.1103	495.725	434.653	148.686
MGLibB_47083	Sbp	97.0296	53.5919	79.6863	99.1243
MGLibB_42681	Prkaa1	31.8927	493.045	39.8432	16.5207
MGLibB_04073	Amz1	14.1896	0	12.6774	4.7202
MGLibB_56599	Tubg2	3.64875	2.67959	3.6221	0
MGLibA_19078	Fut10	50.8122	209.008	106.852	21.2409
MGLibB_05074	Arid2	9.86513	0	3.6221	4.7202
MGLibB_21362	Gm4175	73.9209	75.0286	88.7416	66.0828
MGLibA_61684	Zp3r	100.543	1291.56	1204.35	94.404
MGLibA_51555	St3gal4	39.1902	53.5919	32.5989	42.4818
MGLibA_26519	Itgb4	40.2714	37.5143	27.1658	68.4429
MGLibA_50786	Spata24	10.8111	8.03878	18.1105	14.1606
MGLibB_32313	Msl3	17.2978	16.0776	18.1105	23.601
MGLibB_26247	Iqgap1	14.3247	5.35919	7.24421	7.0803
MGLibA_10140	Chchd5	57.9745	32.1551	36.221	35.4015
MGLibB_60480	Zfp207	2.56764	0	0	4.7202
MGLibA_15481	Edc4	12.703	13.398	5.43316	9.4404
MGLibB_31431	Mlec	24.1898	8.03878	18.1105	49.5621
MGLibB_59107	Vwa5b2	7.43263	2.67959	5.43316	0
MGLibB_16367	Epn1	5.54069	10.7184	10.8663	0
MGLibB_19125	Fxyd6	20.1357	273.319	311.501	1512.82
MGLibB_21811	Gm6432	7.83805	10.7184	9.05526	14.1606
MGLibA_51958	Stx7	142.436	1455.02	1363.72	5071.86
MGLibB_39276	Pabpn1	1.7568	0	10.8663	4.7202
MGLibB_53347	Tekt5	61.0827	176.853	190.16	354.015
MGLibA_24409	Hivep1	21.7573	10.7184	5.43316	11.8005
MGLibA_54691	Tmem256	17.568	297.435	177.483	160.487
MGLibB_61668	Zp3	36.7577	13.398	18.1105	35.4015
MGLibB_03821	Alg10b	16.6221	16.0776	9.05526	7.0803
MGLibA_47892	Serpinb3c	68.7856	45.5531	77.8752	87.3237
MGLibB_56418	Ttc37	73.7858	42.8735	59.7647	51.9222
MGLibB_53994	Tlk2	24.5953	10.7184	14.4884	11.8005
MGLibA_52592	Taf1	31.7576	16.0776	14.4884	33.0414
MGLibB_38358	Olfr809	21.8925	34.8347	27.1658	37.7616
MGLibA_55780	Trim32	72.5695	50.9123	63.3868	75.5232
MGLibB_43011	Prpf4b	10.4057	10.7184	7.24421	4.7202
MGLibA_30583	Mbtd1	13.7842	18.7572	7.24421	9.4404
MGLibA_64252	mmu-mir-511	8.91916	8.03878	7.24421	7.0803
MGLibA_43445	Psmc6	28.244	13.398	21.7326	28.3212
MGLibB_61349	Zfp938	0.945971	2.67959	1.81105	0
MGLibB_38253	Olfr769	2.02708	2.67959	1.81105	0
MGLibA_11453	Copb2	5.27041	2.67959	5.43316	4.7202
MGLibB_28157	Krtap19-9b	43.5147	45.5531	52.5205	49.5621
MGLibA_30338	Mapk12	0.270278	0	0	0
MGLibB_13586	Ddx20	2.29736	0	1.81105	0
MGLibB_27514	Klf3	20.406	56.2715	3.6221	4.7202
MGLibA_65143	mmu-let-7k	70.5424	1414.83	624.813	474.38
MGLibB_16957	Fabp1	32.4333	605.588	536.071	564.064
MGLibB_34456	Nox3	27.4332	246.523	65.1979	30.6813
MGLibB_18136	Fcgr4	26.7575	16.0776	23.5437	25.9611
MGLibA_14073	Dhrs1	16.3518	8.03878	18.1105	16.5207
MGLibB_16675	Etf1	8.51374	2.67959	5.43316	7.0803
MGLibB_18147	Fchsd1	24.0547	2.67959	23.5437	56.6424
MGLibB_60070	Zbtb42	48.9202	16.0776	7.24421	33.0414
MGLibB_29475	Lrrc48	4.1893	0	1.81105	4.7202
MGLibA_14060	Dhodh	84.5969	187.572	162.995	113.285
MGLibA_40367	Peg3	36.7577	1093.27	499.85	4788.65
MGLibB_25571	Igfbp6	3.78389	0	1.81105	4.7202
MGLibA_45340	Rgs7bp	17.9735	267.959	19.9216	42.4818
MGLibA_37949	Olfr643	46.4877	26.7959	50.7095	59.0025
MGLibB_36655	Olfr1472	2.02708	5.35919	0	4.7202
MGLibB_08097	Cask	18.7843	0	16.2995	9.4404
MGLibB_36046	Olfr1240	21.3519	26.7959	12.6774	2.3601
MGLibB_16526	Ermap	129.868	911.062	150.317	202.969
MGLibB_00978	2700094K13Rik	18.514	361.745	117.718	9.4404
MGLibA_64779	mmu-mir-3095	15.4058	8.03878	12.6774	18.8808
MGLibB_53089	Tceb3	7.29749	13.398	3.6221	9.4404
MGLibA_20162	Glrx	44.8661	13.398	19.9216	35.4015
MGLibB_23935	Hebp1	9.59485	5.35919	5.43316	4.7202
MGLibA_48107	Sfrp4	9.0543	5.35919	9.05526	11.8005
MGLibB_56918	Ube2j2	12.4328	8.03878	7.24421	14.1606
MGLibB_13249	Dand5	17.8383	8.03878	14.4884	18.8808
MGLibB_19468	Gars	14.595	16.0776	19.9216	42.4818
MGLibA_10685	Cldnd2	25.5412	332.27	99.6079	1949.44
MGLibB_07897	Camta2	5.27041	8.03878	3.6221	2.3601
MGLibA_59867	Ybx1	22.9736	18.7572	16.2995	25.9611
MGLibB_38205	Olfr741	9.0543	8.03878	9.05526	4.7202
MGLibA_14687	Dock5	4.32444	2.67959	0	0
MGLibA_54624	Tmem234	6.75694	8.03878	7.24421	2.3601
MGLibB_60618	Zfp345	54.1906	45.5531	41.6542	59.0025
MGLibB_33859	Nfe2l2	5.67583	0	9.05526	4.7202
MGLibB_21607	Gm5414	2.97305	5.35919	9.05526	0
MGLibA_13305	Dbf4	55.4069	168.814	50.7095	87.3237
MGLibA_52819	Tas2r138	130.274	777.082	639.301	460.22
MGLibA_15115	Dusp6	13.5139	8.03878	12.6774	7.0803
MGLibA_27210	Kdelr2	22.0276	10.7184	3.6221	4.7202
MGLibA_40005	Pcsk2	25.4061	26.7959	10.8663	2.3601
MGLibA_38141	Olfr713	36.6226	21.4367	27.1658	7.0803
MGLibB_46115	Rpgrip1	23.379	34.8347	30.7879	16.5207
MGLibB_26698	Josd1	8.51374	5.35919	5.43316	28.3212
MGLibB_07392	Bzw1	7.56777	2.67959	9.05526	7.0803
MGLibB_16810	Exoc6	20.9465	29.4755	23.5437	7.0803
MGLibB_30765	Me1	2.56764	0	1.81105	2.3601
MGLibB_56373	Ttc23l	47.704	493.045	398.432	92.0439
MGLibA_43709	Ptplad1	39.0551	5.35919	12.6774	0
MGLibB_21026	Gm17660	50.0013	10.7184	30.7879	61.3626
MGLibB_35456	Olfml1	9.45971	96.4654	38.0321	14.1606
MGLibA_00916	2610015P09Rik	31.4873	109.863	27.1658	44.8419
MGLibA_08863	Ccng2	28.1089	24.1163	25.3547	28.3212
MGLibB_42720	Prkca	16.2167	24.1163	28.9768	28.3212
MGLibA_40148	Pde6d	55.0015	184.892	108.663	108.565
MGLibA_30174	Man2c1	11.3517	5.35919	10.8663	0
MGLibB_14145	Diap1	42.1633	34.8347	41.6542	70.803
MGLibB_25412	Ifna14	79.4616	40.1939	83.3084	106.205
MGLibB_56088	Trpv3	7.02722	5.35919	0	18.8808
MGLibB_49741	Slc8b1	27.5683	2.67959	14.4884	25.9611
MGLibB_21294	Gm3435	5.13527	5.35919	0	0
MGLibA_51312	Srp54a	79.5967	56.2715	50.7095	66.0828
MGLibA_55672	Treml4	19.7303	32.1551	14.4884	7.0803
MGLibA_34115	Nkrf	17.7032	8.03878	34.41	25.9611
MGLibA_41895	Polr2d	18.514	5.35919	9.05526	54.2823
MGLibA_47054	Satb1	16.0815	75.0286	5.43316	11.8005
MGLibA_20228	Gm10024	105.138	401.939	472.685	70.803
MGLibA_11785	Cpxcr1	19.46	18.7572	30.7879	33.0414
MGLibB_36381	Olfr135	53.1095	150.057	45.2763	77.8833
MGLibB_18892	Fras1	85.2726	190.251	79.6863	70.803
MGLibA_50469	Snx33	73.9209	80.3878	106.852	101.484
MGLibA_23485	H2-DMa	105.814	913.741	990.646	1097.45
MGLibB_62523	NonTargetingControlGuideForMouse_0719	59.0556	24.1163	47.0874	30.6813
MGLibA_47611	Seh1l	9.18944	0	0	2.3601
MGLibB_53006	Tbx1	16.8923	8.03878	23.5437	37.7616
MGLibB_27816	Klrb1b	2.29736	0	1.81105	4.7202
MGLibB_07377	Bud13	8.51374	8.03878	12.6774	9.4404
MGLibA_31380	Mis18a	75.4074	58.9511	105.041	82.6035
MGLibA_30133	Maml1	129.058	439.453	517.961	918.079
MGLibA_59002	Vps37c	87.7051	383.182	262.603	106.205
MGLibA_31313	Mief1	96.8945	91.1062	115.907	108.565
MGLibB_53566	Tfpi2	36.7577	26.7959	32.5989	40.1217
MGLibA_55256	Tnpo3	15.9464	18.7572	18.1105	35.4015
MGLibB_23683	Hao1	47.1634	40.1939	52.5205	96.7642
MGLibB_43955	Pydc3	16.7572	5.35919	9.05526	21.2409
MGLibB_60557	Zfp286	9.72999	10.7184	3.6221	2.3601
MGLibA_06776	Bdnf	52.7041	101.825	47.0874	49.5621
MGLibA_14644	Dnpep	62.5692	273.319	63.3868	30.6813
MGLibA_16175	Eno1	96.4891	48.2327	63.3868	143.966
MGLibA_61726	Zscan21	6.08124	5.35919	1.81105	4.7202
MGLibA_16794	Exoc1	96.7594	155.416	103.23	96.7642
MGLibB_32720	Mx1	21.0816	16.0776	28.9768	7.0803
MGLibA_10571	Clca5	0.810833	2.67959	0	0
MGLibA_53485	Tex26	53.1095	13.398	32.5989	23.601
MGLibB_38911	Oprk1	49.0554	24.1163	43.4653	35.4015
MGLibA_36545	Olfr1420	5.40555	5.35919	1.81105	11.8005
MGLibA_52876	Tbc1d14	86.7591	77.7082	88.7416	94.404
MGLibA_44644	Rasl12	45.0012	37.5143	34.41	33.0414
MGLibB_08249	Cbx4	2.4325	0	0	2.3601
MGLibA_27070	Kcnmb3	20.2708	8.03878	5.43316	9.4404
MGLibB_01724	6430531B16Rik	14.3247	10.7184	10.8663	9.4404
MGLibB_38286	Olfr780	36.2172	557.355	30.7879	21.2409
MGLibA_48776	Slc15a3	32.8387	1615.79	1899.79	6117.38
MGLibA_31840	Mpv17l	55.6772	58.9511	36.221	30.6813
MGLibA_55047	Tmx1	21.7573	13.398	21.7326	42.4818
MGLibB_49971	Smarca4	19.1897	13.398	23.5437	11.8005
MGLibB_03675	Akr1b8	52.569	61.6306	72.4421	61.3626
MGLibB_40060	Pdcd6	24.0547	13.398	19.9216	28.3212
MGLibA_48824	Slc16a9	14.1896	50.9123	28.9768	23.601
MGLibA_08352	Ccdc125	52.0284	302.794	132.207	73.1631
MGLibB_31476	Mlxipl	9.18944	5.35919	7.24421	14.1606
MGLibB_08632	Ccdc71l	44.8661	42.8735	39.8432	87.3237
MGLibA_07654	Cacna1a	17.4329	8.03878	16.2995	33.0414
MGLibB_51717	Steap4	7.56777	5.35919	9.05526	9.4404
MGLibA_15339	EU599041	11.6219	16.0776	9.05526	2.3601
MGLibB_35429	Oip5	9.45971	5.35919	12.6774	4.7202
MGLibA_40206	Pdhx	67.4342	45.5531	61.5758	80.2434
MGLibA_17247	Fam163b	25.2709	16.0776	9.05526	16.5207
MGLibB_11456	Copg1	26.8926	1361.23	354.966	1373.58
MGLibB_11602	Cox6b2	46.3526	217.047	57.9537	63.7227
MGLibB_31990	Mrpl14	7.16235	2.67959	12.6774	7.0803
MGLibA_46809	Ryr2	25.8115	13.398	19.9216	7.0803
MGLibA_12785	Cyp2c39	35.2712	24.1163	38.0321	18.8808
MGLibB_04489	Ap1g2	51.4879	203.649	57.9537	73.1631
MGLibB_14182	Dip2c	7.02722	0	0	11.8005
MGLibB_18702	Folr1	2.4325	0	1.81105	0
MGLibA_37269	Olfr365	24.4601	21.4367	30.7879	40.1217
MGLibA_52035	Sult1b1	40.1362	131.3	32.5989	75.5232
MGLibB_02618	Ace	29.3251	142.018	77.8752	682.069
MGLibB_27308	Kidins220	2.4325	0	0	4.7202
MGLibB_16708	Ets2	28.5143	533.239	88.7416	16.5207
MGLibA_12447	Ctu1	21.0816	5.35919	5.43316	16.5207
MGLibB_39487	Paqr9	58.2448	32.1551	63.3868	42.4818
MGLibA_30344	Mapk14	22.7033	16.0776	16.2995	14.1606
MGLibB_29956	Macf1	30.2711	13.398	28.9768	23.601
MGLibA_04047	Amtn	20.8114	10.7184	9.05526	25.9611
MGLibA_06002	Atxn7l1	14.3247	5.35919	18.1105	16.5207
MGLibB_12633	Cyb5r1	0.135139	0	0	0
MGLibA_28632	Lcn3	447.174	2374.12	1908.85	4389.79
MGLibA_64747	mmu-mir-873a	28.5143	8.03878	16.2995	33.0414
MGLibA_50640	Sox4	21.7573	5.35919	10.8663	18.8808
MGLibA_40543	Pgap2	73.1101	69.6694	61.5758	66.0828
MGLibA_37453	Olfr453	16.8923	10.7184	14.4884	23.601
MGLibA_34613	Npy1r	76.6237	50.9123	61.5758	73.1631
MGLibA_22360	Gorab	27.4332	26.7959	19.9216	35.4015
MGLibB_17439	Fam212a	7.02722	13.398	7.24421	11.8005
MGLibB_32686	Murc	15.6761	10.7184	3.6221	7.0803
MGLibA_50130	Smim7	10.4057	5.35919	3.6221	4.7202
MGLibA_10275	Chn2	88.7862	85.747	108.663	110.925
MGLibA_56888	Ube2c	28.1089	18.7572	16.2995	35.4015
MGLibB_22052	Gm906	0.405416	2.67959	0	0
MGLibA_13315	Dbn1	42.9741	21.4367	32.5989	40.1217
MGLibB_61064	Zfp689	10.1354	5.35919	10.8663	0
MGLibB_39043	Osr2	11.6219	0	3.6221	4.7202
MGLibA_11469	Cops3	20.9465	5.35919	19.9216	14.1606
MGLibA_27893	Kng1	32.0279	29.4755	34.41	30.6813
MGLibA_54940	Tmigd1	120.138	241.163	237.248	148.686
MGLibB_04391	Ano7	0.270278	0	0	2.3601
MGLibB_59594	Wnt7b	80.6778	292.076	45.2763	80.2434
MGLibB_19564	Gbp2b	8.24346	5.35919	3.6221	0
MGLibB_54586	Tmem225	3.24333	5.35919	5.43316	4.7202
MGLibA_10379	Chst11	40.6768	37.5143	28.9768	40.1217
MGLibB_09976	Ces1a	28.6494	16.0776	27.1658	49.5621
MGLibA_18398	Fgl2	33.7847	32.1551	39.8432	30.6813
MGLibA_24541	Hn1	10.5408	8.03878	7.24421	4.7202
MGLibB_48373	Shh	19.3248	2.67959	9.05526	11.8005
MGLibA_05808	Atp5e	126.76	726.17	941.747	143.966
MGLibB_62104	NonTargetingControlGuideForMouse_0300	94.462	184.892	94.1747	89.6838
MGLibA_43282	Prune2	23.7844	29.4755	21.7326	33.0414
MGLibA_42866	Prl8a6	5.40555	0	1.81105	0
MGLibB_44311	Racgap1	34.8658	16.0776	19.9216	51.9222
MGLibA_02109	AI837181	89.7321	479.647	115.907	84.9636
MGLibA_00887	2410137M14Rik	186.897	1883.75	181.105	158.127
MGLibA_52299	Syn2	53.9204	24.1163	28.9768	63.7227
MGLibA_45154	Ret	127.976	391.221	128.585	158.127
MGLibB_41108	Piwil1	15.2707	0	7.24421	11.8005
MGLibA_47394	Sctr	36.6226	18.7572	21.7326	25.9611
MGLibA_07692	Cacna2d4	10.2705	5.35919	3.6221	7.0803
MGLibB_08805	Ccl8	34.8658	112.543	59.7647	573.505
MGLibA_13304	Dbf4	141.625	3890.77	1130.1	3049.25
MGLibB_40114	Pde4c	24.325	8.03878	41.6542	33.0414
MGLibA_00343	1700017D01Rik	38.2443	182.212	34.41	33.0414
MGLibB_43314	Psg17	19.1897	8.03878	27.1658	25.9611
MGLibA_35377	Odf1	45.812	1243.33	1428.92	8994.35
MGLibB_61748	Zswim3	22.433	13.398	18.1105	14.1606
MGLibA_24141	Hid1	65.5423	1318.36	1802	3962.61
MGLibA_43227	Prss41	64.0558	128.62	92.3637	120.365
MGLibB_04214	Ankrd12	3.24333	5.35919	3.6221	0
MGLibA_04302	Ankrd46	67.4342	24.1163	36.221	89.6838
MGLibA_02888	Acvr2a	23.1087	13.398	16.2995	16.5207
MGLibA_40322	Pdzd9	6.21638	2.67959	16.2995	0
MGLibA_17098	Fam118b	27.7034	16.0776	25.3547	25.9611
MGLibA_64016	mmu-mir-3086	16.7572	16.0776	10.8663	4.7202
MGLibB_27074	Kcnn3	59.0556	72.349	79.6863	44.8419
MGLibA_60987	Zfp617	29.3251	18.7572	23.5437	7.0803
MGLibB_44162	Rab34	10.0003	48.2327	12.6774	4.7202
MGLibB_47094	Sc5d	1.89194	8.03878	7.24421	0
MGLibA_02533	Acad12	65.9477	75.0286	68.82	70.803
MGLibA_07407	C130026I21Rik	3.51361	2.67959	1.81105	0
MGLibA_46733	Rundc3a	85.8131	959.294	722.61	823.675
MGLibA_12086	Csf2rb	63.5152	29.4755	45.2763	18.8808
MGLibB_13055	Cytl1	14.0544	10.7184	12.6774	9.4404
MGLibB_18292	Fgf11	27.8386	26.7959	30.7879	54.2823
MGLibB_43229	Prss46	15.541	16.0776	21.7326	28.3212
MGLibB_49382	Slc37a3	13.7842	58.9511	18.1105	2.3601
MGLibA_36891	Olfr197	36.7577	83.0674	25.3547	68.4429
MGLibB_41844	Poll	6.08124	0	5.43316	0
MGLibA_46794	Rxrb	12.4328	10.7184	16.2995	4.7202
MGLibA_62933	mmu-mir-1247	52.2987	144.698	52.5205	59.0025
MGLibA_51162	Spry4	27.7034	26.7959	30.7879	21.2409
MGLibA_40049	Pdcd11	68.9208	48.2327	79.6863	134.526
MGLibB_11478	Cops6	14.595	2.67959	7.24421	23.601
MGLibA_65571	mmu-mir-7058	21.4871	337.629	112.285	816.595
MGLibB_53322	Tectb	27.298	8.03878	27.1658	9.4404
MGLibB_22035	Gm8882	36.8929	42.8735	14.4884	16.5207
MGLibA_64547	mmu-mir-7007	164.058	166.135	148.506	153.407
MGLibB_01498	4932418E24Rik	191.086	401.939	248.114	221.85
MGLibB_35500	Olfr1016	0.540555	0	0	0
MGLibB_39951	Pcna	4.72986	0	3.6221	7.0803
MGLibB_36773	Olfr155	29.4603	5.35919	12.6774	18.8808
MGLibA_27095	Kcnq3	0.540555	0	0	0
MGLibB_44633	Rasl2-9	24.1898	24.1163	32.5989	35.4015
MGLibB_50610	Sox1	6.48666	2.67959	3.6221	2.3601
MGLibB_18600	Fmnl2	100.949	629.704	581.348	136.886
MGLibA_64550	mmu-mir-3092	10.8111	21.4367	12.6774	14.1606
MGLibA_13869	Defb6	27.9737	29.4755	9.05526	16.5207
MGLibB_31455	Mllt11	53.7852	233.125	99.6079	51.9222
MGLibB_22770	Gpr83	7.29749	2.67959	5.43316	14.1606
MGLibA_07307	Btbd8	36.082	144.698	48.8984	99.1243
MGLibB_11904	Crip2	49.8662	142.018	63.3868	75.5232
MGLibB_01288	4930467E23Rik	29.8657	399.259	396.62	2990.25
MGLibA_09743	Cecr2	13.3787	18.7572	12.6774	23.601
MGLibA_63653	mmu-mir-7214	52.1636	50.9123	38.0321	61.3626
MGLibB_16871	Eya1	20.6762	10.7184	5.43316	21.2409
MGLibA_33006	Myof	130.409	128.62	146.695	155.767
MGLibA_36997	Olfr247	11.6219	8.03878	14.4884	7.0803
MGLibA_50657	Sp100	1.89194	0	1.81105	4.7202
MGLibA_06755	Bcor	27.9737	184.892	139.451	44.8419
MGLibB_33956	Ngrn	21.8925	21.4367	14.4884	21.2409
MGLibB_47853	Serpinb12	20.1357	5.35919	19.9216	16.5207
MGLibB_34416	Nos3	34.4604	803.878	233.626	25.9611
MGLibA_09054	Cd209b	69.0559	93.7858	101.419	70.803
MGLibA_18140	Fcgr3	44.4607	18.7572	19.9216	40.1217
MGLibB_58965	Vps33a	85.0023	61.6306	43.4653	51.9222
MGLibA_00111	1110038F14Rik	5.00013	0	0	2.3601
MGLibA_50479	Snx5	4.59472	2.67959	5.43316	9.4404
MGLibB_48044	Sf3a1	1.08111	158.096	1.81105	0
MGLibA_52551	Tacstd2	29.4603	29.4755	16.2995	28.3212
MGLibA_40090	Pddc1	41.4876	91.1062	43.4653	47.202
MGLibB_58169	Vmn1r200	78.2453	1141.51	485.362	106.205
MGLibA_10910	Cltc	16.4869	10.7184	14.4884	4.7202
MGLibB_60392	Zfp111	17.8383	26.7959	23.5437	7.0803
MGLibA_08710	Ccdc93	112.571	75.0286	117.718	59.0025
MGLibB_58648	Vmn2r22	47.9743	131.3	52.5205	33.0414
MGLibB_54207	Tmeff1	17.9735	18.7572	19.9216	14.1606
MGLibB_29208	Lpcat1	2.29736	0	0	0
MGLibA_45535	Rhox8	155.139	629.704	449.141	1029
MGLibA_04639	Aplp1	4.72986	2.67959	9.05526	9.4404
MGLibB_42507	Pramef12	14.0544	5.35919	7.24421	2.3601
MGLibB_47521	Sec16a	17.9735	233.125	19.9216	28.3212
MGLibA_08170	Catsperg1	35.0009	217.047	36.221	28.3212
MGLibA_30726	Mcur1	15.6761	13.398	10.8663	11.8005
MGLibB_52529	Tacr2	24.1898	10.7184	25.3547	30.6813
MGLibA_44437	Ralgapa2	50.8122	85.747	34.41	40.1217
MGLibA_21277	Gm3336	76.2183	921.78	994.268	868.517
MGLibA_16550	Ero1lb	19.5951	1023.6	440.086	35.4015
MGLibA_03023	Adamts12	5.40555	5.35919	9.05526	9.4404
MGLibB_60704	Zfp3	67.0288	29.4755	28.9768	63.7227
MGLibA_10597	Clcn6	73.9209	289.396	81.4974	106.205
MGLibA_63792	mmu-mir-1949	42.5687	26.7959	45.2763	73.1631
MGLibA_59162	Wars2	48.7851	37.5143	72.4421	42.4818
MGLibA_50715	Spag11a	38.2443	37.5143	7.24421	35.4015
MGLibB_07676	Cacna1h	42.839	24.1163	43.4653	23.601
MGLibA_56159	Tsen15	52.8393	72.349	43.4653	42.4818
MGLibB_46274	Rpl7	2.02708	0	0	7.0803
MGLibA_21495	Gm4906	45.4066	75.0286	59.7647	21.2409
MGLibA_51482	Sstr3	119.463	659.18	193.783	285.572
MGLibB_13421	Dclre1b	57.1637	42.8735	63.3868	51.9222
MGLibA_13882	Degs2	3.64875	0	1.81105	0
MGLibB_08070	Cars	0.405416	0	0	0
MGLibB_02380	Abcf2	2.29736	0	0	4.7202
MGLibA_05970	Atrnl1	94.3269	1272.81	621.191	77.8833
MGLibA_36648	Olfr1465	11.4868	5.35919	16.2995	18.8808
MGLibB_52205	Svs2	10.8111	6583.76	1186.24	2289.3
MGLibA_53103	Tceb2	28.3791	131.3	25.3547	47.202
MGLibA_53117	Tcf15	35.8118	2.67959	10.8663	7.0803
MGLibB_18811	Foxn1	0.135139	0	0	4.7202
MGLibB_28663	Ldb3	71.7587	107.184	43.4653	108.565
MGLibB_62493	NonTargetingControlGuideForMouse_0689	124.463	1093.27	724.421	339.855
MGLibB_41570	Pltp	16.6221	16.0776	7.24421	16.5207
MGLibB_20083	Gli2	4.05416	2.67959	7.24421	2.3601
MGLibB_18856	Foxred1	48.9202	18.7572	28.9768	23.601
MGLibB_43037	Prps1l3	3.64875	2.67959	0	0
MGLibA_48700	Slc10a2	20.8114	13.398	14.4884	30.6813
MGLibA_17375	Fam193b	54.5961	155.416	77.8752	61.3626
MGLibA_15882	Eif4e	5.13527	0	5.43316	7.0803
MGLibA_61856	mmu-mir-5103	86.7591	83.0674	86.9305	103.844
MGLibB_35691	Olfr1101	4.865	2.67959	3.6221	14.1606
MGLibB_11839	Creb1	34.1901	24.1163	27.1658	44.8419
MGLibB_56245	Tspan5	12.703	8.03878	7.24421	4.7202
MGLibB_14238	Dld	26.6223	16.0776	47.0874	21.2409
MGLibA_23957	Hectd3	8.24346	2.67959	0	28.3212
MGLibA_48853	Slc17a9	14.595	107.184	12.6774	30.6813
MGLibA_08634	Ccdc71	39.1902	29.4755	30.7879	21.2409
MGLibA_57732	V1ra8	8.3786	176.853	0	16.5207
MGLibB_51761	Stk24	8.78402	0	3.6221	9.4404
MGLibA_26118	Insl6	89.4619	487.686	99.6079	84.9636
MGLibB_01913	A1bg	18.514	174.174	10.8663	4.7202
MGLibA_01109	4632428N05Rik	38.7848	37.5143	52.5205	37.7616
MGLibB_36862	Olfr191	2.16222	0	0	2.3601
MGLibB_40308	Pdzd8	20.8114	10.7184	30.7879	16.5207
MGLibA_06284	BC024139	45.6769	163.455	41.6542	42.4818
MGLibA_31656	Mobp	41.2173	18.7572	41.6542	16.5207
MGLibA_28529	Lbx1	4.32444	0	1.81105	2.3601
MGLibB_38144	Olfr71	5.94611	8.03878	14.4884	0
MGLibB_29321	Lrmp	45.812	61.6306	79.6863	49.5621
MGLibA_54323	Tmem132e	41.4876	225.086	39.8432	16.5207
MGLibA_62603	mmu-mir-6936	43.9201	56.2715	30.7879	44.8419
MGLibB_61684	Zranb2	0.810833	0	0	0
MGLibB_20014	Gjc3	7.83805	10.7184	7.24421	9.4404
MGLibA_11002	Cmtm8	37.5686	24.1163	14.4884	33.0414
MGLibA_62849	mmu-mir-654	30.9468	10.7184	19.9216	33.0414
MGLibB_33514	Ndufa12	4.05416	0	1.81105	0
MGLibA_16782	Exd1	81.0833	32.1551	47.0874	73.1631
MGLibA_29899	Lysmd3	6.48666	10.7184	12.6774	0
MGLibB_17105	Fam122a	36.8929	112.543	18.1105	40.1217
[truncated: 123,794 more rows]

## Sheet: Figure_1_F
Sort 1							Sort 2						Sort 3
Gene	Total number of sgRNA targeting this gene	RRA score				Number of sgRNA targeting this gene selected in the screen
id	num	pos|score	pos|p-value	pos|fdr	pos|rank	pos|goodsgrna	id	pos|score	pos|p-value	pos|fdr	pos|rank	pos|goodsgrna	id	pos|score	pos|p-value	pos|fdr	pos|rank	pos|goodsgrna
Nf2	6	3.89e-09	2.19e-07	0.00495	1	6	Nf2	8.04e-10	2.19e-07	0.00495	1	6	Nf2	3.3e-12	2.19e-07	0.002475	1	6
Rock2	6	1.5e-07	1.53e-06	0.017327	2	5	Rock2	2.52e-07	2.41e-06	0.027228	2	5	Rock2	5.14e-09	2.19e-07	0.002475	2	6
Ptchd1	6	2.32e-06	1.2e-05	0.090759	3	2	Ube2m	6.32e-07	3.72e-06	0.028053	3	5	Ube2m	7.72e-08	1.53e-06	0.011551	3	6
Ube2m	6	8.39e-06	3.83e-05	0.180693	4	5	Traf3	1.95e-06	1.03e-05	0.058168	4	4	Traf3	3.8e-06	1.73e-05	0.097772	4	4
Traf3	6	9.34e-06	4.22e-05	0.180693	5	4	Asph	1.68e-05	5.84e-05	0.264233	5	3	Serpina3a	1.33e-05	5.36e-05	0.220297	5	3
Asph	6	1.08e-05	4.79e-05	0.180693	6	3	Fbxw19	2.38e-05	8.75e-05	0.264233	6	3	Klhl29	1.48e-05	5.84e-05	0.220297	6	3
Fbxw19	6	2.38e-05	0.00010593	0.342291	7	3	Ptpn12	2.43e-05	8.95e-05	0.264233	7	3	1700010I14Rik	1.94e-05	7.86e-05	0.25389	7	4
Efemp2	6	3.9e-05	0.00016612	0.469678	8	3	1700010I14Rik	2.56e-05	9.35e-05	0.264233	8	4	Ywhaq	2.38e-05	9.7e-05	0.274134	8	1
Ptpn12	6	5.41e-05	0.00021558	0.535956	9	3	Kmt2c	4.83e-05	0.00016787	0.391584	9	4	Ptpn12	3.94e-05	0.0001508	0.378988	9	3
Cenpn	6	7.15e-05	0.00027467	0.535956	10	1	Dkk4	4.95e-05	0.00017312	0.391584	10	3	Kmt2c	4.64e-05	0.00017181	0.388614	10	4
Vmn2r60	6	9.72e-05	0.00036353	0.535956	11	3	Ppy	7.08e-05	0.00023834	0.450908	11	4	Cers5	5.58e-05	0.0002042	0.415512	11	3
Olfr132	6	9.97e-05	0.00037273	0.535956	12	2	Ywhaq	7.15e-05	0.00023922	0.450908	12	1	Fbxw19	7.15e-05	0.00024972	0.415512	12	2
Stam	6	0.00010221	0.00038367	0.535956	13	3	Myoc	8.81e-05	0.00029131	0.458086	13	4	Depdc5	7.54e-05	0.00026636	0.415512	13	3
Slc1a4	6	0.00010346	0.00038848	0.535956	14	4	Vmn2r96	8.81e-05	0.00029131	0.458086	14	4	Slc1a4	7.58e-05	0.0002668	0.415512	14	4
1700010I14Rik	6	0.00010517	0.0003968	0.535956	15	4	Klhl29	9.13e-05	0.00030378	0.458086	15	3	Klra9	7.87e-05	0.00027555	0.415512	15	2
Srgap2	6	0.00010953	0.00041343	0.535956	16	4	Fyttd1	0.00010563	0.00035784	0.47203	16	2	Efemp2	8.85e-05	0.00030444	0.430384	16	3
Kmt2c	6	0.00011225	0.00042306	0.535956	17	4	Ctnnb1	0.00011168	0.00038411	0.47203	17	2	4921530D09Rik	0.00010911	0.00037929	0.504659	17	2
Ngfr	6	0.00011924	0.00044889	0.535956	18	1	Nhlrc2	0.00011722	0.00040774	0.47203	18	4	Theg	0.00011924	0.00041825	0.517196	18	1
Klhl29	6	0.00011972	0.0004502	0.535956	19	4	Olfr1198	0.00011924	0.00041256	0.47203	19	1	Oas1g	0.00012376	0.00043445	0.517196	19	4
Rbm34	6	0.00013551	0.00049879	0.564109	20	4	Efemp2	0.00012087	0.00041737	0.47203	20	3	Nhlrc2	0.00014387	0.00050317	0.569059	20	4
Aste1	6	0.00016198	0.00058721	0.625338	21	4	Serpina3a	0.00015682	0.00051718	0.557049	21	2	Prpf4	0.00016693	0.00058152	0.59014	21	1
Ywhaq	6	0.00016693	0.00060822	0.625338	22	1	Sirt5	0.00016693	0.00054475	0.560081	22	1	Rab9	0.00017296	0.00060866	0.59014	22	3
Traf4	6	0.00021117	0.00076756	0.735767	23	4	Kcnn1	0.00019452	0.00062223	0.578678	23	3	Myh7b	0.00017408	0.00061523	0.59014	23	2
Pla2g7	6	0.00021462	0.00078069	0.735767	24	3	Ccdc173	0.00019649	0.00063142	0.578678	24	2	Zfp560	0.00017757	0.00062617	0.59014	24	3
Nhlrc2	6	0.00023815	0.00086298	0.741301	25	4	Sdcbp	0.00021462	0.00068351	0.578678	25	1	Traf4	0.00019199	0.00068308	0.61802	25	4
Chp2	6	0.00025637	0.00092251	0.741301	26	3	Abi2	0.00022336	0.00071109	0.578678	26	3	Rpl13a	0.00019837	0.00071065	0.618241	26	4
Vmn1r206	6	0.00026231	0.00094396	0.741301	27	2	Tspan2	0.00022616	0.00071634	0.578678	27	3	Cpne9	0.00023855	0.00085204	0.681818	27	4
Slc4a5	6	0.00028373	0.001007	0.741301	28	3	Adh6a	0.00022616	0.00071634	0.578678	28	3	Csde1	0.00025497	0.00089888	0.681818	28	2
Tuba4a	6	0.00030243	0.0010718	0.741301	29	4	Havcr2	0.00025562	0.00078813	0.614715	29	3	Cpsf6	0.00026231	0.0009247	0.681818	29	1
Gm20939	6	0.00030461	0.0010805	0.741301	30	4	Chp2	0.00028548	0.00086342	0.65099	30	3	St6gal2	0.00028104	0.0009641	0.681818	30	3
Ghrhr	6	0.00030999	0.0010985	0.741301	31	1	Ghrhr	0.00030999	0.00092295	0.673427	31	1	mmu-mir-3093	0.00028304	0.00096891	0.681818	31	3
Olfr695	6	0.00031037	0.0010998	0.741301	32	4	Ltbp2	0.00035768	0.0010473	0.73207	32	1	Ctnnb1	0.00028909	0.00098336	0.681818	32	2
Col8a1	6	0.00031661	0.0011247	0.741301	33	2	Pnmal2	0.0003896	0.0011265	0.73207	33	2	Cacng4	0.00029324	0.00099474	0.681818	33	3
Grpr	6	0.00031769	0.0011287	0.741301	34	3	F13b	0.00039516	0.0011444	0.73207	34	3	Odf2l	0.00030999	0.0010324	0.683027	34	1
Mn1	6	0.00032204	0.0011471	0.741301	35	2	Adam12	0.00039925	0.0011541	0.73207	35	2	Apoc1	0.00031986	0.0010569	0.683027	35	2
Ltbp2	6	0.00035768	0.0012749	0.784988	36	2	Vmn1r206	0.00040536	0.0011707	0.73207	36	2	Spopl	0.00035768	0.0011589	0.728135	36	1
Eif2s2	6	0.0003602	0.0012841	0.784988	37	2	Rbm34	0.00041796	0.0012088	0.73207	37	3	Fance	0.00037819	0.0012105	0.733325	37	3
Pipox	6	0.00039482	0.0013913	0.819634	38	3	Ccnt1	0.0004289	0.0012429	0.73207	38	2	Lpin2	0.00038686	0.001232	0.733325	38	3
Olfr1198	6	0.00040536	0.0014307	0.819634	39	1	Eif2s2	0.00043774	0.0012736	0.73207	39	2	Ulk2	0.00040536	0.0012832	0.744224	39	1
Vmn2r29	2	0.00042923	0.0015244	0.819634	40	1	4933436I01Rik	0.00045304	0.0013121	0.73207	40	2	Pin1rt1	0.00041692	0.0013213	0.747153	40	3
Tspyl4	6	0.00044101	0.0015655	0.819634	41	4	Myh7b	0.00045959	0.001327	0.73207	41	2	Ptchd1	0.00045304	0.0014285	0.751238	41	1
Cir1	6	0.00044467	0.0015778	0.819634	42	3	Csf1r	0.00049132	0.0014158	0.760239	42	2	Gpr45	0.00046055	0.0014478	0.751238	42	3
Pea15a	6	0.00045304	0.0016054	0.819634	43	1	Cpsf6	0.00050072	0.0014465	0.760239	43	1	Tspan2	0.00046546	0.0014614	0.751238	43	3
Serpina3a	6	0.0004544	0.0016076	0.819634	44	2	Sppl2a	0.00051575	0.0014789	0.760239	44	3	Ppid	0.00046546	0.0014614	0.751238	44	2
Cpsf6	6	0.00050072	0.0017695	0.819634	45	1	Cebpb	0.00053832	0.0015366	0.772387	45	3	Sirt5	0.00050072	0.0015524	0.773286	45	1
Tsr3	6	0.00050981	0.0017958	0.819634	46	3	Psme4	0.00055078	0.0015721	0.773031	46	2	Cebpb	0.00053914	0.0016505	0.773286	46	3
Ccdc173	6	0.0005241	0.00184	0.819634	47	3	Rprd2	0.00059607	0.0016951	0.80153	47	1	Ltbp2	0.00054839	0.0016791	0.773286	47	1
mmu-mir-1902	4	0.00053132	0.0018619	0.819634	48	3	E030018B13Rik	0.00062146	0.0017656	0.80153	48	3	Slc1a5	0.00057231	0.0017441	0.773286	48	2
Ctnnb1	6	0.00053806	0.0018851	0.819634	49	2	Tpsab1	0.00063184	0.0017958	0.80153	49	3	Zfp534	0.00058268	0.0017695	0.773286	49	2
Zfp534	2	0.00054457	0.0019022	0.819634	50	2	Olfr412	0.00063399	0.0018019	0.80153	50	2	Cyp2b23	0.00058473	0.0017752	0.773286	50	3
Sc4mol	6	0.00054839	0.0019162	0.819634	51	1	Trnau1ap	0.00064374	0.0018277	0.80153	51	2	BC100530	0.0005879	0.0017809	0.773286	51	2
Cbx2	6	0.00054964	0.0019205	0.819634	52	3	Golt1b	0.00065478	0.0018553	0.80153	52	3	Sdcbp	0.00059607	0.0018032	0.773286	52	1
Cacna2d4	6	0.00054964	0.0019205	0.819634	53	4	Prpf3	0.00067494	0.0018995	0.80153	53	3	Vmn1r216	0.00060313	0.0018181	0.773286	53	2
Sdcbp	6	0.00059607	0.0020803	0.863456	54	2	Psmb5	0.00068111	0.0019157	0.80153	54	3	Ltv1	0.00061431	0.0018461	0.773286	54	3
Sppl2a	6	0.00060236	0.0020996	0.863456	55	3	Rpain	0.00069141	0.001949	0.80153	55	1	Ccnt1	0.0006378	0.001917	0.781029	55	2
mmu-mir-6236	4	0.00061765	0.0021552	0.864782	56	3	Lag3	0.00073908	0.0020768	0.810129	56	1	Pde12	0.00064374	0.0019337	0.781029	56	3
Ythdf3	6	0.00063838	0.0022221	0.864782	57	4	Rhox2d	0.00074891	0.0021026	0.810129	57	3	Apoc2	0.00069141	0.0020462	0.801005	57	1
Adam12	6	0.00065008	0.0022602	0.864782	58	2	Fcer1a	0.00075578	0.0021193	0.810129	58	2	Eci3	0.00071449	0.0021066	0.801005	58	3
Tjap1	6	0.00069141	0.0023915	0.864782	59	2	Ranbp2	0.00078334	0.0021876	0.810129	59	3	Cypt14	0.00073908	0.0021687	0.801005	59	1
Gm13212	3	0.00070703	0.0024357	0.864782	60	3	Csde1	0.00078675	0.0021976	0.810129	60	1	Rilp	0.0007479	0.0021897	0.801005	60	3
Odf3	6	0.00070959	0.0024414	0.864782	61	3	Olfr132	0.00080812	0.0022501	0.810129	61	2	mmu-mir-3473c	0.00077883	0.0022668	0.801005	61	2
Ccdc160	6	0.00071376	0.002455	0.864782	62	4	Olfr44	0.00081209	0.0022607	0.810129	62	3	mmu-mir-9-3	0.00078445	0.0022751	0.801005	62	3
Nrtn	6	0.00073093	0.0025067	0.864782	63	4	Dpf1	0.00082093	0.0022821	0.810129	63	3	Lag3	0.00078675	0.0022803	0.801005	63	1
Adh6a	6	0.00073598	0.002525	0.864782	64	2	Mpped2	0.00083441	0.0023276	0.810129	64	1	Cxcr4	0.00078935	0.0022869	0.801005	64	3
Rftn1	6	0.00073908	0.0025347	0.864782	65	1	Vmn2r29	0.00083453	0.0023281	0.810129	65	1	Cntln	0.00080298	0.0023145	0.801005	65	2
Lhpp	6	0.00076482	0.0026117	0.864782	66	4	Olfr493	0.00086299	0.0024099	0.824049	66	3	Eif2s2	0.00081156	0.0023373	0.801005	66	2
Sf3b2	6	0.00076603	0.0026156	0.864782	67	4	Pde12	0.00088208	0.0024576	0.824049	67	1	Slc29a3	0.00083441	0.0024003	0.81033	67	2
Ptplad1	6	0.00076934	0.0026253	0.864782	68	3	Mstn	0.00089786	0.0024961	0.824049	68	3	Hip1r	0.00088208	0.0025242	0.815316	68	1
Mlf2	6	0.00078675	0.0026791	0.864782	69	1	Theg	0.00092974	0.0025784	0.824049	69	1	Il18rap	0.00091505	0.0026043	0.815316	69	3
Rassf10	6	0.00081771	0.0027785	0.864782	70	3	Trmt13	0.00095836	0.0026476	0.824049	70	3	Npdc1	0.00092314	0.0026292	0.815316	70	3
Vmn1r217	6	0.00081845	0.0027798	0.864782	71	2	Fbxo17	0.0009774	0.0026909	0.824049	71	1	Tyrp1	0.00092974	0.0026454	0.815316	71	2
Sirt5	6	0.00083441	0.0028393	0.864782	72	1	Slc1a5	0.00098296	0.0027067	0.824049	72	2	Olfr1416	0.00096416	0.0027316	0.815316	72	2
Flt1	6	0.00084806	0.0028884	0.864782	73	3	Cenpn	0.0010251	0.0028109	0.824049	73	2	Ttc18	0.0009774	0.0027583	0.815316	73	1
Vmn2r117	6	0.00087462	0.0029755	0.864782	74	2	Olfr1054	0.0010389	0.0028525	0.824049	74	3	Csf1r	0.00099053	0.0027912	0.815316	74	2
4933436I01Rik	6	0.00088208	0.0029987	0.864782	75	2	Rftn1	0.0010727	0.0029286	0.824049	75	1	Ccdc173	0.0010085	0.0028314	0.815316	75	3
Cav2	6	0.00089988	0.0030613	0.864782	76	4	Ebf4	0.0010962	0.0029864	0.824049	76	3	Eif4h	0.0010159	0.0028498	0.815316	76	3
Csf1r	6	0.00090339	0.0030709	0.864782	77	2	Tbck	0.0011204	0.0030499	0.824049	77	1	Kdm5c	0.0010251	0.0028704	0.815316	77	1
Agl	6	0.00092256	0.0031339	0.864782	78	3	Eif4h	0.0011438	0.0031133	0.824049	78	3	Rftn1	0.0010295	0.0028814	0.815316	78	3
Pnmal2	6	0.00092974	0.0031619	0.864782	79	2	H2-T22	0.0011484	0.0031252	0.824049	79	2	Fam169b	0.0010508	0.0029396	0.815316	79	3
Prpf3	6	0.000943	0.0032026	0.864782	80	3	Apoc2	0.001168	0.0031764	0.824049	80	2	Akap8l	0.0010981	0.0030508	0.815316	80	3
Pglyrp1	6	0.00094554	0.0032105	0.864782	81	2	Zkscan7	0.0011745	0.003193	0.824049	81	2	Acsbg2	0.0011046	0.0030683	0.815316	81	3
Faxc	6	0.00095896	0.0032438	0.864782	82	3	Plxna2	0.0011952	0.003246	0.824049	82	2	Myl6	0.0011053	0.0030691	0.815316	82	3
Khdrbs1	6	0.00095955	0.0032455	0.864782	83	3	Traf4	0.0012024	0.0032644	0.824049	83	3	Pax3	0.0011309	0.0031374	0.815316	83	3
Abi2	6	0.00096372	0.0032539	0.864782	84	3	Pom121l12	0.0012079	0.0032753	0.824049	84	3	Defb28	0.0011509	0.0031843	0.815316	84	2
F13b	6	0.00097149	0.0032753	0.864782	85	3	1700007K09Rik	0.001212	0.0032845	0.824049	85	3	Akap7	0.0011744	0.0032455	0.815316	85	3
Capn9	6	0.0009774	0.003288	0.864782	86	2	Capn9	0.0012157	0.0032959	0.824049	86	2	Agbl5	0.0011832	0.003267	0.815316	86	3
Csde1	6	0.0010251	0.0033896	0.881245	87	2	Ston1	0.0012301	0.0033261	0.824049	87	3	Onecut1	0.0011931	0.0032941	0.815316	87	3
Rhebl1	6	0.0010541	0.0034657	0.883158	88	3	Tmem190	0.0012399	0.0033493	0.824049	88	3	Trnt1	0.001214	0.0033388	0.815316	88	2
Prokr1	6	0.0010727	0.0035077	0.883158	89	1	NonTargetingControlGuideForMouse_0612	0.0012441	0.0033607	0.824049	89	1	Scyl1	0.0012157	0.0033432	0.815316	89	1
Ttc25	6	0.0010757	0.0035165	0.883158	90	2	Nexn	0.0012562	0.0033935	0.824049	90	2	Swap70	0.0012223	0.0033585	0.815316	90	2
H2-T22	3	0.0010992	0.0035752	0.883158	91	2	Ptchd1	0.0012633	0.0034154	0.824049	91	2	Tbck	0.0012633	0.0034631	0.815316	91	1
Myh7b	6	0.0011175	0.0036268	0.883158	92	2	Orai2	0.0012875	0.0034806	0.824049	92	3	mmu-mir-344e	0.001306	0.0035743	0.815316	92	2
Asb12	6	0.0011204	0.0036312	0.883158	93	2	Kras	0.001311	0.003541	0.824049	93	1	D1Pas1	0.001311	0.0035865	0.815316	93	2
Olfr1450	6	0.001168	0.0037397	0.89724	94	1	Srgap2	0.0013377	0.0036071	0.824049	94	3	Tmem190	0.0013245	0.0036207	0.815316	94	3
Lypd8	6	0.0011825	0.0037748	0.89724	95	3	Bcl7a	0.0013502	0.0036382	0.824049	95	3	Ak8	0.0013538	0.0036938	0.815316	95	2
Ccnt1	6	0.001214	0.0038487	0.89724	96	2	Pea15a	0.0013586	0.0036618	0.824049	96	1	Gltscr1	0.0013586	0.0037069	0.815316	96	1
Cbr4	6	0.0012626	0.0039599	0.89724	97	2	Gm266	0.0013591	0.0036644	0.824049	97	3	Fbxo17	0.0014062	0.003819	0.815316	97	2
Coa4	6	0.0012871	0.0040199	0.89724	98	1	Olfr1453	0.0013621	0.0036715	0.824049	98	3	Cenpb	0.0014241	0.0038632	0.815316	98	3
E030018B13Rik	6	0.001315	0.0040956	0.89724	99	3	Vmn2r117	0.0013648	0.0036776	0.824049	99	2	Olfr1014	0.0014539	0.0039437	0.815316	99	1
Cacng4	6	0.0013165	0.0040996	0.89724	100	3	Gpr33	0.0013733	0.003696	0.824049	100	3	Zfp385b	0.0014691	0.003984	0.815316	100	3
Tmco2	6	0.0013187	0.0041052	0.89724	101	2	Vmn1r217	0.0014062	0.0037713	0.824049	101	3	Try10	0.0014897	0.0040365	0.815316	101	1
mmu-mir-3088	4	0.001319	0.0041079	0.89724	102	1	Ccl12	0.001428	0.0038299	0.824049	102	3	Arhgef9	0.0014899	0.004037	0.815316	102	3
Camk1	6	0.0013449	0.0041709	0.89724	103	2	Lyg2	0.0014537	0.0038973	0.824049	103	2	Tmem88	0.0015015	0.0040689	0.815316	103	1
Aknad1	6	0.0013476	0.0041779	0.89724	104	3	9230110F15Rik	0.0014537	0.0038973	0.824049	104	2	Ddx4	0.0015265	0.0041324	0.815316	104	3
Fam45a	6	0.0013586	0.0042042	0.89724	105	1	Arsj	0.0014537	0.0038973	0.824049	105	2	Rbm43	0.0015313	0.004142	0.815316	105	2
Pom121l12	6	0.0013869	0.0042654	0.89724	106	3	Acy3	0.0014537	0.0038973	0.824049	106	2	Cypt4	0.0015426	0.0041718	0.815316	106	2
Olfm1	6	0.0014035	0.0043048	0.89724	107	3	Ms4a15	0.0014539	0.0038982	0.824049	107	1	Tubb2a	0.0015492	0.0041867	0.815316	107	1
Ppy	6	0.001431	0.0043718	0.89724	108	3	Tubb2a	0.0015492	0.0041462	0.837994	108	2	Bbs1	0.001569	0.0042405	0.815316	108	3
Gpr113	6	0.0014504	0.0044278	0.89724	109	3	Khnyn	0.0015643	0.0041875	0.837994	109	2	Ythdf3	0.0015714	0.0042462	0.815316	109	2
Rprd2	6	0.0014539	0.0044349	0.89724	110	2	Cda	0.001569	0.0042037	0.837994	110	3	Slc38a7	0.0015809	0.0042738	0.815316	110	2
Peg12	6	0.0014706	0.0044782	0.89724	111	3	Pcdhga11	0.0015865	0.0042514	0.837994	111	2	Impg1	0.0015968	0.0043219	0.815316	111	1
Plxna2	6	0.0014986	0.0045561	0.89724	112	2	Gltscr1	0.0015968	0.0042764	0.837994	112	1	Dpf1	0.0016144	0.0043644	0.815316	112	3
A1cf	6	0.0015015	0.0045609	0.89724	113	2	Zfp276	0.0016	0.0042843	0.837994	113	2	mmu-mir-5112	0.0016366	0.0044309	0.815316	113	1
D1Pas1	6	0.0015492	0.0046787	0.89724	114	2	Cntn3	0.001633	0.0043762	0.837994	114	3	Fgd2	0.0016444	0.004455	0.815316	114	1
Cebpb	6	0.0015535	0.0046918	0.89724	115	3	Cog1	0.0016444	0.004416	0.837994	115	1	Hint2	0.0016452	0.0044576	0.815316	115	3
Gigyf2	6	0.0015619	0.0047128	0.89724	116	2	Gpr45	0.0016531	0.0044366	0.837994	116	2	Spint3	0.0016519	0.0044764	0.815316	116	2
Slc1a5	6	0.0015762	0.0047535	0.89724	117	2	Gm15455	0.001658	0.0044493	0.837994	117	2	Zmynd19	0.0016751	0.0045255	0.815316	117	2
Il1f9	6	0.0015833	0.0047723	0.89724	118	3	Sprr1b	0.0016876	0.0045206	0.837994	118	3	Fam71a	0.0016921	0.0045631	0.815316	118	1
Arhgap11a	6	0.0015895	0.0047872	0.89724	119	3	Odf2l	0.0016921	0.0045303	0.837994	119	1	Pou6f1	0.0016972	0.0045771	0.815316	119	2
Rpain	6	0.0015968	0.0048074	0.89724	120	1	Slc1a4	0.0017091	0.0045723	0.837994	120	3	Ube2e2	0.0017108	0.0046143	0.815316	120	3
2700094K13Rik	6	0.0016126	0.0048402	0.89724	121	3	Vmn1r216	0.0017095	0.0045754	0.837994	121	2	Dppa3	0.0017269	0.0046546	0.815316	121	2
Pde12	6	0.0016444	0.0049264	0.89724	122	3	Sorcs3	0.0017397	0.0046471	0.837994	122	2	Cdkl3	0.0017269	0.0046546	0.815316	122	3
Mpped2	6	0.0016921	0.0050459	0.89724	123	1	Olfr1288	0.0017816	0.004757	0.837994	123	3	Fnip1	0.0017269	0.0046546	0.815316	123	2
Olfr1208	6	0.0016928	0.0050468	0.89724	124	3	Hip1r	0.0017873	0.0047697	0.837994	124	1	Slc23a3	0.0017397	0.00469	0.815316	124	1
Fbxo17	6	0.0017397	0.0051667	0.89724	125	2	Try10	0.0018072	0.0048222	0.837994	125	1	Meis3	0.0017622	0.0047439	0.815316	125	3
Erp29	6	0.0017693	0.0052442	0.89724	126	3	Hoxc11	0.0018354	0.004905	0.837994	126	2	Ppy	0.0017644	0.0047509	0.815316	126	2
Trnau1ap	6	0.0017873	0.0052902	0.89724	127	3	Zbtb26	0.0018598	0.0049641	0.837994	127	3	NonTargetingControlGuideForMouse_0612	0.0017688	0.0047614	0.815316	127	1
Dxo	6	0.0017896	0.0052972	0.89724	128	2	Tm9sf4	0.0018643	0.0049741	0.837994	128	3	Zfp39	0.0017744	0.0047745	0.815316	128	2
Zkscan7	6	0.0018226	0.0053852	0.89724	129	2	St6gal2	0.0018872	0.0050354	0.837994	129	3	Cd44	0.0017845	0.0047986	0.815316	129	2
Spred1	6	0.0018349	0.0054158	0.89724	130	3	Fmo3	0.0018999	0.0050691	0.837994	130	2	Mecom	0.0017921	0.0048166	0.815316	130	3
Gltscr1	6	0.0018826	0.0055441	0.89724	131	1	Evi5	0.001926	0.0051313	0.837994	131	3	Orai2	0.0018057	0.0048568	0.815316	131	3
Eif2s1	6	0.0019116	0.0056128	0.89724	132	2	Fam178b	0.001926	0.0051313	0.837994	132	3	Dmtf1	0.0018335	0.004929	0.815316	132	3
Trafd1	6	0.0019116	0.0056128	0.89724	133	2	Spopl	0.0019302	0.0051422	0.837994	133	1	Slc26a7	0.0018349	0.004933	0.815316	133	1
Eapp	6	0.0019274	0.0056504	0.89724	134	3	mmu-mir-3473b	0.0019542	0.0052044	0.837994	134	1	Vmn1r222	0.0018482	0.0049693	0.815316	134	2
Apoc2	6	0.0019302	0.0056605	0.89724	135	1	Scyl1	0.0019778	0.0052565	0.837994	135	1	Olfr1472	0.0018826	0.0050682	0.815316	135	2
NonTargetingControlGuideForMouse_0612	1	0.0019993	0.0058154	0.89724	136	1	Copg1	0.0020014	0.0053138	0.837994	136	3	mmu-mir-1291	0.001918	0.0051554	0.815316	136	2
Rhox13	6	0.0020053	0.005829	0.89724	137	3	Pdha1	0.0020254	0.0053773	0.837994	137	1	Trnau1ap	0.0019302	0.0051834	0.815316	137	2
Celf4	6	0.0020254	0.0058697	0.89724	138	1	Trip12	0.0020312	0.0053904	0.837994	138	3	Olfr1013	0.0019354	0.0051961	0.815316	138	3
Fam105b	6	0.002073	0.0060019	0.89724	139	1	Rhebl1	0.002073	0.0054937	0.837994	139	3	mmu-mir-467g	0.0019357	0.0051969	0.815316	139	1
Olfr493	6	0.0020846	0.006033	0.89724	140	3	Scn2a1	0.0020738	0.0054946	0.837994	140	3	Olfr1305	0.0019447	0.005221	0.815316	140	3
Il12rb1	6	0.0020934	0.0060527	0.89724	141	3	Lypd8	0.0020918	0.0055366	0.837994	141	2	Ctsll3	0.0019626	0.0052622	0.815316	141	3
Grasp	6	0.0020945	0.0060553	0.89724	142	2	Zfp763	0.0021136	0.0055883	0.837994	142	2	Rpain	0.0019778	0.0052985	0.815316	142	2
Dedd2	6	0.0021207	0.0061153	0.89724	143	2	Reps2	0.0021161	0.0055953	0.837994	143	3	Rbm5	0.0019815	0.0053077	0.815316	143	3
Spopl	6	0.0021683	0.0062304	0.89724	144	1	Rfpl4b	0.0021207	0.0056053	0.837994	144	1	Rpl4	0.0020161	0.0053935	0.815316	144	2
Xlr3b	3	0.002171	0.0062379	0.89724	145	2	Ddx58	0.0021349	0.005636	0.837994	145	3	Olfr1034	0.0020161	0.0053935	0.815316	145	2
Selplg	6	0.0021771	0.0062536	0.89724	146	3	Gm525	0.0021359	0.0056373	0.837994	146	3	Zfp869	0.002024	0.0054167	0.815316	146	3
mmu-mir-7044	4	0.0022081	0.0063403	0.89724	147	1	Depdc5	0.0021605	0.0056986	0.837994	147	2	Gtf3c1	0.0020254	0.0054189	0.815316	147	1
Psmb5	6	0.0022159	0.0063578	0.89724	148	2	Smim8	0.0021694	0.0057231	0.837994	148	3	Ankrd23	0.0020486	0.0054788	0.815316	148	3
Orai2	6	0.0022256	0.006381	0.89724	149	3	Coa4	0.0022159	0.0058448	0.837994	149	1	mmu-mir-3473b	0.0020494	0.0054819	0.815316	149	1
Lag3	6	0.0022635	0.0064593	0.89724	150	1	Selplg	0.0022615	0.0059468	0.837994	150	3	Vmn2r117	0.0020665	0.0055265	0.815316	150	3
Agr3	6	0.0023111	0.0065701	0.89724	151	1	Kdm5c	0.0022635	0.0059503	0.837994	151	1	Ap1m2	0.0020727	0.0055392	0.815316	151	2
Sv2b	6	0.002324	0.0065964	0.89724	152	3	Ash2l	0.0022755	0.0059813	0.837994	152	2	Aars	0.002073	0.0055401	0.815316	152	1
E2f5	6	0.002324	0.0065964	0.89724	153	3	Ivl	0.0022999	0.0060374	0.837994	153	3	Spred1	0.0020865	0.0055712	0.815316	153	3
mmu-mir-8103	4	0.0023542	0.0066699	0.89724	154	2	Tyrp1	0.0023111	0.0060706	0.837994	154	1	Fbxo18	0.002089	0.0055756	0.815316	154	2
Eci3	6	0.0023788	0.0067334	0.89724	155	3	Olfr798	0.0023156	0.0060816	0.837994	155	3	mmu-mir-6946	0.0021009	0.0056014	0.815316	155	2
Fkbp6	6	0.0023904	0.0067609	0.89724	156	2	Gm13212	0.0023306	0.0061181	0.837994	156	2	Asb18	0.0021207	0.0056425	0.815316	156	1
4933426M11Rik	6	0.0023918	0.0067649	0.89724	157	3	Agl	0.0023376	0.0061367	0.837994	157	3	Gmfg	0.0021384	0.0056863	0.815316	157	3
Usp35	6	0.0024063	0.006799	0.89724	158	2	Zfp534	0.00234	0.0061416	0.837994	158	2	Gcnt4	0.0021519	0.0057231	0.815316	158	3
Cypt4	3	0.0024425	0.0068765	0.89724	159	1	Gm7073	0.0023413	0.0061451	0.837994	159	2	Plxna2	0.002166	0.005762	0.815316	159	2
Galr2	6	0.002449	0.0068896	0.89724	160	2	Cacng4	0.0023429	0.0061507	0.837994	160	3	Ggcx	0.0021683	0.0057673	0.815316	160	1
Sorcs3	6	0.0024539	0.0069032	0.89724	161	1	Impg1	0.0023587	0.006195	0.837994	161	1	Trpc4ap	0.0021855	0.0058067	0.815786	161	3
Pcdhga11	2	0.0024777	0.0069649	0.89724	162	2	Apoc1	0.0023788	0.0062475	0.837994	162	2	Rit2	0.0022159	0.0058894	0.817935	162	1
Golt1b	6	0.0024892	0.0069934	0.89724	163	3	6330416G13Rik	0.0023963	0.0062882	0.837994	163	2	Sprr1b	0.0022348	0.0059367	0.817935	163	3
Tubb2a	6	0.0025015	0.0070196	0.89724	164	3	Trpc4ap	0.0024019	0.006304	0.837994	164	3	Mptx2	0.0022512	0.0059708	0.817935	164	2
Twf2	6	0.0025201	0.0070634	0.89724	165	3	Ap3m2	0.0024063	0.0063149	0.837994	165	1	Nipbl	0.0022635	0.006001	0.817935	165	1
Kif1a	6	0.0025656	0.0071772	0.89724	166	3	Ythdf3	0.0024138	0.0063245	0.837994	166	2	Gng8	0.0022641	0.0060028	0.817935	166	2
Cd59b	6	0.0025967	0.0072538	0.89724	167	1	Gfap	0.0024255	0.0063499	0.837994	167	2	Ccl12	0.0022822	0.0060444	0.81867	167	3
Rhox2d	6	0.0026219	0.007312	0.89724	168	3	Btf3l4	0.0024369	0.0063757	0.837994	168	3	Olfr1198	0.0023111	0.0061179	0.821226	168	1
Vmn1r216	6	0.0026377	0.0073528	0.89724	169	2	Tm6sf1	0.0024539	0.0064156	0.837994	169	1	Prpf3	0.0023183	0.0061359	0.821226	169	3
Egr2	6	0.0026435	0.0073676	0.89724	170	3	mmu-mir-467g	0.0024604	0.0064318	0.837994	170	1	Gsr	0.0023587	0.0062309	0.829033	170	1
Hydin	6	0.0026443	0.0073689	0.89724	171	1	Olfm1	0.0024674	0.0064471	0.837994	171	3	Gm266	0.002396	0.0063237	0.83646	171	3
Gm266	6	0.0026538	0.0073961	0.89724	172	3	Vmn2r60	0.0024844	0.0064948	0.837994	172	2	Ston1	0.0024167	0.0063744	0.838274	172	2
B3gnt7	6	0.0026698	0.007439	0.89724	173	3	Cypt4	0.0024901	0.0065036	0.837994	173	1	Olfr1023	0.0024401	0.006427	0.840296	173	2
Crh	6	0.0026919	0.0074871	0.89724	174	2	Xiap	0.0025491	0.0066467	0.837994	174	1	Eif4g3	0.0024586	0.0064755	0.841783	174	3
Olfr46	6	0.0027299	0.0075852	0.89724	175	3	Ulk2	0.0025967	0.0067666	0.837994	175	1	Sdk1	0.0025015	0.0065771	0.850099	175	1
Tbck	6	0.0027395	0.0076066	0.89724	176	1	Crtc3	0.0026219	0.0068231	0.837994	176	3	Pdha1	0.0025491	0.0066922	0.856463	176	1
Cks2	6	0.0027424	0.0076114	0.89724	177	2	Cers5	0.0026255	0.0068327	0.837994	177	2	Acot7	0.0025567	0.006711	0.856463	177	3
Mstn	6	0.002752	0.0076333	0.89724	178	3	Dnah8	0.0026435	0.0068769	0.837994	178	3	Olig2	0.0025735	0.0067544	0.856463	178	3
Fmo3	6	0.0027673	0.007671	0.89724	179	3	Olfr1472	0.0026443	0.0068787	0.837994	179	1	Ldlrap1	0.0025861	0.0067911	0.856463	179	2
Trnt1	6	0.0027798	0.0077034	0.89724	180	2	Cat	0.0026469	0.0068892	0.837994	180	2	Ajap1	0.0025967	0.0068157	0.856463	180	1
Tmem202	6	0.0027849	0.0077165	0.89724	181	3	Eci3	0.0026538	0.0069054	0.837994	181	3	Tsr3	0.0026194	0.0068699	0.858514	181	2
Vwc2l	6	0.0027861	0.0077183	0.89724	182	2	Tnn	0.002656	0.0069124	0.837994	182	2	Trim11	0.0026837	0.0070231	0.859976	182	2
Zfp131	6	0.0027871	0.0077196	0.89724	183	1	Onecut1	0.0026641	0.0069336	0.837994	183	3	Il1rapl1	0.0026898	0.007035	0.859976	183	2
St6gal2	6	0.0028085	0.0077717	0.89724	184	3	Spta1	0.0026641	0.0069336	0.837994	184	3	Olfr223	0.0026919	0.0070402	0.859976	184	2
Syt16	6	0.0028238	0.0078076	0.89724	185	2	Trnt1	0.0026714	0.0069514	0.837994	185	2	Hsd17b6	0.0026928	0.0070428	0.859976	185	3
Il1rapl1	6	0.0028269	0.0078172	0.89724	186	2	Fam71a	0.0026919	0.0070039	0.837994	186	1	3830403N18Rik	0.0027044	0.0070717	0.859976	186	1
Serp1	6	0.0028346	0.0078369	0.89724	187	1	mmu-mir-1291	0.0027063	0.0070398	0.837994	187	2	Ctsr	0.0027395	0.0071492	0.861168	187	1
mmu-mir-467g	1	0.0028499	0.007878	0.89724	188	1	Olfr60	0.0027114	0.007052	0.837994	188	2	Ms4a15	0.0028346	0.0073781	0.861168	188	2
Fabp6	6	0.0028822	0.0079664	0.89724	189	2	D1Pas1	0.0027176	0.0070669	0.837994	189	2	Antxr2	0.0028472	0.0074118	0.861168	189	3
Csf3r	6	0.0029019	0.0080207	0.89724	190	3	Cyp2b23	0.0027395	0.0071177	0.837994	190	2	Asph	0.002868	0.0074604	0.861168	190	2
Nexn	6	0.0029351	0.0081048	0.89724	191	2	Gpr113	0.0027486	0.0071418	0.837994	191	2	Crhbp	0.0028822	0.0074968	0.861168	191	1
Frzb	6	0.0029487	0.008135	0.89724	192	3	2017-09-06	0.0027798	0.0072267	0.837994	192	2	Homer3	0.0029158	0.0075777	0.861168	192	2
Impg1	6	0.0029774	0.0082138	0.89724	193	1	Usp35	0.0027871	0.007242	0.837994	193	1	Acy3	0.0029298	0.007615	0.861168	193	1
Ntsr1	6	0.0029834	0.0082251	0.89724	194	2	Cenpb	0.0027967	0.0072656	0.837994	194	3	Olfr1381	0.0029742	0.0077323	0.861168	194	2
Dhrs7	6	0.0029899	0.0082418	0.89724	195	3	Ctsll3	0.0028168	0.0073186	0.837994	195	3	Hydin	0.0029774	0.0077419	0.861168	195	1
Pcif1	6	0.0030009	0.0082676	0.89724	196	3	Sil1	0.0028206	0.00733	0.837994	196	2	Rasal2	0.0029824	0.0077533	0.861168	196	3
Ms4a15	6	0.003025	0.0083298	0.89724	197	1	Olfr318	0.0028346	0.0073676	0.837994	197	1	Trim9	0.0029899	0.007776	0.861168	197	2
Dpf1	6	0.0030393	0.0083648	0.89724	198	3	Fgd2	0.0028382	0.0073781	0.837994	198	3	Atg4c	0.003025	0.0078618	0.861168	198	2
Etf1	6	0.0030693	0.0084423	0.89724	199	3	Fbxo18	0.0028712	0.0074596	0.837994	199	2	Agrp	0.0030256	0.0078636	0.861168	199	2
Fyttd1	6	0.0030725	0.0084515	0.89724	200	1	4921530D09Rik	0.0028807	0.0074898	0.837994	200	2	Mapk1ip1	0.0030331	0.0078815	0.861168	200	3
2017-03-04	6	0.0030911	0.0084979	0.89724	201	2	Spock1	0.0028822	0.0074946	0.837994	201	1	2300003K06Rik	0.0030443	0.0079109	0.861168	201	3
Gm5938	6	0.0031071	0.0085372	0.89724	202	3	mmu-mir-1941	0.0029035	0.0075572	0.837994	202	2	F830045P16Rik	0.0030605	0.0079494	0.861168	202	3
Aptx	6	0.0031197	0.0085648	0.89724	203	3	4930524B15Rik	0.0029097	0.0075712	0.837994	203	3	Fam222a	0.0030681	0.0079669	0.861168	203	2
Zfp768	6	0.0031201	0.0085661	0.89724	204	1	Stmn2	0.0029097	0.0075712	0.837994	204	3	Defb34	0.0030747	0.0079848	0.861168	204	2
Zfp869	6	0.0031407	0.0086112	0.89724	205	2	Evi5l	0.0029676	0.0077213	0.837994	205	3	Vtcn1	0.0030845	0.0080085	0.861168	205	2
Hip1r	6	0.0031677	0.0086769	0.89724	206	1	Rprd1b	0.0029774	0.007748	0.837994	206	1	Foxn1	0.0031045	0.0080575	0.861168	206	3
Olfr589	6	0.0031689	0.0086815	0.89724	207	2	Bex4	0.0030045	0.0078172	0.837994	207	2	Dimt1	0.0031201	0.0081004	0.861168	207	1
Kdm5c	6	0.0032153	0.0087894	0.89724	208	1	Arhgef3	0.0030045	0.0078172	0.837994	208	2	Rgs20	0.0031362	0.0081407	0.861168	208	3
Gpr45	6	0.0032409	0.0088568	0.89724	209	2	Lhx8	0.0030045	0.0078172	0.837994	209	2	Krtap24-1	0.003139	0.0081485	0.861168	209	2
Cog1	6	0.0032628	0.0089093	0.89724	210	1	Olfr346	0.0030045	0.0078172	0.837994	210	2	Mfap1a	0.0031539	0.0081893	0.861168	210	2
Olfr901	6	0.0032713	0.0089286	0.89724	211	2	1810013L24Rik	0.0030045	0.0078172	0.837994	211	2	Khdrbs1	0.0031639	0.0082173	0.861168	211	2
Cers5	6	0.0033154	0.0090354	0.89724	212	2	Gm11563	0.003025	0.0078723	0.839926	212	1	Rfpl4b	0.0031677	0.0082265	0.861168	212	1
Osbpl9	6	0.0033186	0.0090424	0.89724	213	3	Slc29a3	0.0030725	0.00798	0.847418	213	2	Ckap5	0.0031815	0.0082589	0.861168	213	3
Trmt13	6	0.0033509	0.0091242	0.89724	214	3	Slc43a2	0.0031076	0.0080435	0.850167	214	2	Rab39b	0.0032078	0.0083214	0.861168	214	3
Rab7	6	0.0033817	0.0091921	0.89724	215	1	Rassf6	0.003154	0.0081262	0.853387	215	2	Gm13088	0.0032153	0.0083398	0.861168	215	1
Cc2d1b	6	0.0033817	0.0091921	0.89724	216	2	Gsr	0.0031677	0.0081494	0.853387	216	1	Vmn2r60	0.0032409	0.0084059	0.861168	216	2
Zbtb26	6	0.0034286	0.009302	0.89724	217	3	Aknad1	0.0032006	0.0082076	0.855523	217	2	Slc25a25	0.0032428	0.0084125	0.861168	217	3
Olfr539	6	0.0034668	0.0093847	0.89724	218	2	Mertk	0.0032578	0.0083088	0.855558	218	2	Krtap19-5	0.0032477	0.0084243	0.861168	218	2
Stat6	6	0.0034681	0.0093873	0.89724	219	3	Dgcr8	0.0032628	0.0083144	0.855558	219	1	Lpcat4	0.0032628	0.0084615	0.861168	219	1
Ear11	6	0.0034703	0.0093921	0.89724	220	2	Dimt1	0.0033104	0.0084011	0.855558	220	1	mmu-mir-1941	0.0032629	0.0084615	0.861168	220	2
Adck2	6	0.0035121	0.0094963	0.89724	221	2	Mecom	0.0033427	0.0084602	0.855558	221	2	Grhl3	0.0032668	0.0084703	0.861168	221	3
Tmem30c	6	0.0035267	0.0095366	0.89724	222	3	Jade1	0.003358	0.0084799	0.855558	222	1	Olfr556	0.0032858	0.0085136	0.861168	222	3
Gjb5	6	0.003528	0.0095396	0.89724	223	3	Pdcd6	0.0034055	0.0085469	0.855558	223	1	Spock1	0.003358	0.0087053	0.861168	223	1
Sil1	6	0.0035331	0.0095528	0.89724	224	3	2017-03-04	0.0034425	0.0086033	0.855558	224	2	Trdn	0.0033835	0.0087644	0.861168	224	3
Mertk	6	0.0035402	0.0095716	0.89724	225	2	mmu-mir-7044	0.0034457	0.0086082	0.855558	225	1	Olfr727	0.0033942	0.0087859	0.861168	225	3
Olfr1472	6	0.0035482	0.0095917	0.89724	226	2	Agrp	0.0034459	0.0086082	0.855558	226	2	Ahsa2	0.0034183	0.0088428	0.861168	226	3
Efcab7	6	0.0035789	0.0096688	0.89724	227	3	Prpf4	0.0034531	0.00862	0.855558	227	1	mmu-mir-7044	0.0034457	0.0088992	0.861168	227	1
Car14	6	0.0035958	0.0097082	0.89724	228	1	Hist1h2bl	0.0034789	0.0086681	0.855558	228	1	Tm6sf1	0.0034531	0.0089146	0.861168	228	1
Usp33	6	0.0036433	0.0098172	0.89724	229	1	Spred1	0.0035006	0.0087141	0.855558	229	2	2010315B03Rik	0.0034736	0.008975	0.861168	229	3
Arel1	6	0.0036736	0.0098863	0.89724	230	3	Mettl18	0.0035156	0.0087439	0.855558	230	2	Gpr113	0.0034939	0.0090258	0.861168	230	3
Ash2l	6	0.0036748	0.0098894	0.89724	231	2	Mthfd2	0.0035482	0.0088047	0.855558	231	2	Cml5	0.0034947	0.0090284	0.861168	231	3
Psmb9	6	0.0036764	0.009892	0.89724	232	3	Gsdmc3	0.0035621	0.0088305	0.855558	232	2	Akr1c6	0.0035006	0.009045	0.861168	232	1
Tyrp1	6	0.0036909	0.0099174	0.89724	233	2	Spint3	0.0035895	0.0088765	0.855558	233	2	Gipc3	0.003539	0.0091536	0.861168	233	3
Acy1	6	0.0037035	0.0099441	0.89724	234	2	Asb18	0.0035958	0.0088883	0.855558	234	1	Cenpt	0.0035482	0.0091785	0.861168	234	2
Dkk4	6	0.0037071	0.0099542	0.89724	235	2	Olfr1023	0.0035966	0.0088896	0.855558	235	2	mmu-mir-3971	0.0035622	0.0092192	0.861168	235	2
Try10	5	0.0037109	0.0099599	0.89724	236	1	Fbrsl1	0.0036321	0.0089421	0.855558	236	2	Tbcc	0.0035679	0.0092332	0.861168	236	3
Vmn2r18	6	0.0037161	0.0099747	0.89724	237	2	Atg4c	0.0036433	0.0089645	0.855558	237	2	Mpc2	0.0035683	0.0092341	0.861168	237	2
Cd300ld	6	0.0037216	0.0099874	0.89724	238	3	Bmp8b	0.0036963	0.0090463	0.856146	238	2	Zfp768	0.0035683	0.0092341	0.861168	238	2
mmu-mir-3473b	4	0.0037311	0.01001	0.89724	239	1	Olfr589	0.0036963	0.0090463	0.856146	239	2	Reep4	0.0035683	0.0092341	0.861168	239	2
Xiap	6	0.0037384	0.010027	0.89724	240	1	Gtf3c1	0.0037384	0.0091094	0.856909	240	1	mmu-mir-8120	0.0035725	0.0092424	0.861168	240	1
Fzd8	6	0.0037642	0.010084	0.89724	241	3	Ptges3l	0.003786	0.0091811	0.856909	241	1	Prss34	0.0035817	0.0092639	0.861168	241	3
Pdha1	6	0.003786	0.010118	0.89724	242	1	Trim11	0.0038335	0.0092604	0.856909	242	2	Ccdc25	0.0035941	0.0092971	0.861168	242	3
LOC666331	6	0.0038083	0.010176	0.89724	243	2	Med19	0.003874	0.00933	0.856909	243	2	Pipox	0.003631	0.0093764	0.861168	243	3
Ssbp4	6	0.0038119	0.01018	0.89724	244	2	Pde6b	0.003881	0.0093365	0.856909	244	1	mmu-mir-6537	0.0036359	0.0093886	0.861168	244	1
Olfr749	6	0.0038172	0.010192	0.89724	245	3	mmu-mir-6537	0.0038896	0.0093532	0.856909	245	1	Cog1	0.0036433	0.0094114	0.861168	245	1
Odf2l	6	0.0038335	0.010227	0.89724	246	1	Olfr1014	0.0039286	0.0094215	0.856909	246	1	Clspn	0.0036554	0.009446	0.861168	246	3
Myo1g	6	0.0038649	0.010308	0.89724	247	3	Kcnj9	0.0039292	0.0094223	0.856909	247	2	Cyp2r1	0.003657	0.0094482	0.861168	247	2
Ccr4	6	0.003881	0.010343	0.89724	248	1	Map2k7	0.0039761	0.0094963	0.856909	248	1	Svil	0.0036736	0.0094845	0.861168	248	3
Vmn1r27	6	0.0038881	0.010362	0.89724	249	3	Ikzf2	0.0040712	0.0096762	0.856909	249	1	Ddx5	0.0036909	0.0095151	0.861168	249	2
Eda2r	6	0.0038887	0.010362	0.89724	250	2	Olfr566	0.0041158	0.0097484	0.856909	250	2	Cep192	0.0036933	0.0095182	0.861168	250	3
Tcstv3	6	0.0038887	0.010362	0.89724	251	2	Gm13088	0.0041187	0.009753	0.856909	251	1	Nrg3	0.0037131	0.009562	0.861682	251	3
Deb1	6	0.0038887	0.010362	0.89724	252	2	Ajap1	0.0041663	0.009829	0.856909	252	1	Hspa1b	0.0037384	0.0096211	0.863567	252	1
Suco	6	0.0038954	0.010379	0.89724	253	3	Il1f9	0.004184	0.0098592	0.856909	253	2	Dnase1l1	0.0037942	0.0097537	0.864364	253	3
Tm6sf1	6	0.0039286	0.010465	0.89724	254	1	Mfap1a	0.0042063	0.0098973	0.856909	254	2	Snph	0.0038246	0.0098285	0.864364	254	2
Snap25	6	0.0039378	0.010484	0.89724	255	3	Car14	0.0042138	0.0099082	0.856909	255	1	Igf2r	0.0038246	0.0098285	0.864364	255	2
Akap12	6	0.0039422	0.0105	0.89724	256	3	mmu-mir-199b	0.0042272	0.009931	0.856909	256	1	Olfr536	0.0038335	0.0098487	0.864364	256	1
mmu-mir-7029	4	0.003953	0.010525	0.89724	257	1	Mn1	0.0042613	0.0099909	0.856909	257	1	Gm11563	0.003881	0.0099629	0.864364	257	1
Tdpoz1	6	0.0039761	0.010579	0.89724	258	3	1700026L06Rik	0.0043046	0.01006	0.856909	258	2	Nsmf	0.0038813	0.009964	0.864364	258	2
Scyl1	6	0.0039761	0.010579	0.89724	259	1	Pigk	0.0043089	0.010065	0.856909	259	1	Zfp609	0.0038823	0.009966	0.864364	259	3
Khnyn	6	0.0039773	0.010581	0.89724	260	2	Olfr539	0.0043182	0.010081	0.856909	260	2	Slc12a8	0.0039085	0.010033	0.864364	260	3
Zfyve21	6	0.003981	0.010592	0.89724	261	2	Fsd1l	0.0043414	0.010115	0.856909	261	2	Olfr284	0.0039286	0.010085	0.864364	261	2
C77370	6	0.0039847	0.010599	0.89724	262	2	Slc26a7	0.0043564	0.010137	0.856909	262	1	Cspg4	0.0039366	0.010101	0.864364	262	2
Ap3m2	6	0.0040237	0.010703	0.89724	263	1	Ccs	0.0044039	0.010209	0.856909	263	2	1700067P10Rik	0.0039636	0.010171	0.864364	263	3
Gm13247	6	0.0040444	0.01076	0.89724	264	2	Cbr4	0.0044074	0.010215	0.856909	264	2	Rprd1b	0.0039761	0.010201	0.864364	264	1
Nf1	6	0.0040653	0.010812	0.89724	265	3	Rab9	0.0044152	0.010225	0.856909	265	2	Krt76	0.0039961	0.010257	0.864364	265	3
Rfpl4b	6	0.0040712	0.010823	0.89724	266	1	Cypt14	0.0044514	0.010288	0.856909	266	1	Kirrel	0.0039983	0.010264	0.864364	266	3
Cep290	6	0.0040735	0.01083	0.89724	267	3	Nudt10	0.0044887	0.010349	0.856909	267	1	Snap25	0.0040042	0.010279	0.864364	267	3
Tbc1d25	6	0.0040782	0.010841	0.89724	268	2	Vmn1r78	0.0044989	0.010363	0.856909	268	1	Tet3	0.0040101	0.010298	0.864364	268	3
Kras	6	0.0041187	0.010935	0.89724	269	1	Pdcd11	0.0045465	0.010439	0.856909	269	1	Zfp763	0.0040237	0.010331	0.864364	269	1
Nek9	6	0.0041663	0.011057	0.89724	270	2	Gm12253	0.0045607	0.010461	0.856909	270	2	Fbxl12	0.0040257	0.010335	0.864364	270	2
Trip12	6	0.0041938	0.011122	0.89724	271	3	Gtl3	0.0045726	0.010484	0.856909	271	2	Khnyn	0.0040332	0.010356	0.864364	271	2
Cask	6	0.0042138	0.011175	0.89724	272	1	BC100530	0.004574	0.010486	0.856909	272	2	NonTargetingControlGuideForMouse_0248	0.0040901	0.010506	0.873671	272	1
Stox2	6	0.0042383	0.011234	0.89724	273	3	Prkab2	0.0045805	0.010497	0.856909	273	2	Fkbp7	0.0041187	0.010572	0.873843	273	1
Ulk2	6	0.0042613	0.011289	0.89724	274	1	Prokr1	0.004594	0.010527	0.856909	274	1	Bcat1	0.0041253	0.010591	0.873843	274	2
Tnn	6	0.0042643	0.011297	0.89724	275	2	Olfr937	0.0046415	0.010602	0.856909	275	1	Med19	0.0041423	0.010637	0.873843	275	2
Olfr60	6	0.0042796	0.011337	0.89724	276	2	Olfr135	0.0046443	0.01061	0.856909	276	2	Fam53b	0.0041618	0.01069	0.873843	276	3
Stt3a	6	0.0042814	0.011341	0.89724	277	3	Tssk4	0.0046723	0.010657	0.856909	277	2	Acy1	0.0041663	0.010701	0.873843	277	2
Ptgr2	6	0.0042923	0.01137	0.89724	278	3	Spag7	0.004689	0.01068	0.856909	278	1	Ghrhr	0.0042138	0.010817	0.880137	278	1
Cyp2b23	6	0.0043089	0.011406	0.89724	279	2	Nek1	0.0046964	0.010695	0.856909	279	2	Clcn4-2	0.0042529	0.010917	0.880543	279	3
Gm829	6	0.004322	0.011438	0.89724	280	2	Epha6	0.0047286	0.010748	0.856909	280	2	Rasip1	0.0042613	0.01094	0.880543	280	1
Mrpl15	6	0.0043249	0.011446	0.89724	281	3	Olfr1221	0.0047326	0.010755	0.856909	281	2	Ucp2	0.0042796	0.010986	0.880543	281	2
Elmo1	6	0.0043336	0.011465	0.89724	282	2	Homer1	0.0047365	0.01076	0.856909	282	1	Zfp948	0.0042892	0.011011	0.880543	282	3
Stx18	6	0.0043498	0.011502	0.89724	283	3	1810033B17Rik	0.0047811	0.010841	0.856909	283	2	Add1	0.0043062	0.011049	0.880543	283	3
Cxcr4	6	0.0043545	0.011511	0.89724	284	3	Acsm3	0.0047892	0.010853	0.856909	284	2	4930568D16Rik	0.0043089	0.011056	0.880543	284	1
Olfr1082	6	0.0043564	0.011515	0.89724	285	1	Crhbp	0.0048078	0.010886	0.856909	285	1	Mpped2	0.0043564	0.011157	0.88362	285	1
Mgat4b	6	0.0043624	0.011525	0.89724	286	3	Slc24a5	0.0048078	0.010886	0.856909	286	1	Rfwd2	0.0043763	0.011205	0.88362	286	2
Tll1	6	0.0044039	0.011621	0.89724	287	3	Ttc5	0.004838	0.010948	0.856909	287	2	Phf5a	0.0043804	0.011212	0.88362	287	3
Mfsd12	6	0.0044113	0.011635	0.89724	288	2	mmu-mir-3473c	0.0048404	0.01095	0.856909	288	1	Lat2	0.0044039	0.011272	0.88407	288	1
Plxna3	6	0.0044543	0.011748	0.89724	289	2	Ap2m1	0.0048707	0.011005	0.856909	289	2	Phf23	0.0044514	0.011397	0.88407	289	1
Cypt15	6	0.0044989	0.011847	0.89724	290	1	Cenpt	0.004879	0.011018	0.856909	290	1	Tsc2	0.0044601	0.011418	0.88407	290	3
Ppm1m	6	0.0045111	0.011871	0.89724	291	3	Gm5416	0.0049034	0.011051	0.856909	291	2	Slc2a8	0.0044989	0.011516	0.88407	291	1
Mrpl3	6	0.0045449	0.011942	0.89724	292	2	Olfr284	0.0049265	0.011087	0.856909	292	1	Cacna1g	0.0045054	0.011534	0.88407	292	2
Ppp1r27	6	0.0045465	0.011945	0.89724	293	2	Vmn1r5	0.0049322	0.0111	0.856909	293	2	Hspb8	0.0045172	0.011562	0.88407	293	2
Cda	6	0.0045495	0.01195	0.89724	294	3	Tmem63a	0.0049941	0.011203	0.861874	294	2	Pdcd6	0.0045465	0.011626	0.88407	294	1
Agrp	6	0.0045607	0.011976	0.89724	295	2	Lat2	0.005069	0.011333	0.868921	295	1	Gemin2	0.0045726	0.011689	0.88407	295	2
Mettl7a2	5	0.0045825	0.012032	0.89724	296	1	Atp2a2	0.0051165	0.011418	0.872508	296	1	Amz2	0.0045726	0.011689	0.88407	296	2
Fam71a	6	0.004594	0.01206	0.89724	297	1	1700010D01Rik	0.0051368	0.011457	0.872571	297	1	Mettl18	0.0045726	0.011689	0.88407	297	2
Dimt1	6	0.0046415	0.01218	0.89724	298	1	Tmem88	0.0052115	0.011584	0.876952	298	1	Atp2a2	0.004594	0.011747	0.88407	298	1
Olfr318	6	0.004689	0.012283	0.89724	299	1	Chrnb2	0.005259	0.011668	0.876952	299	1	mmu-mir-139	0.0046044	0.01177	0.88407	299	2
Crybg3	6	0.0047084	0.012336	0.89724	300	3	mmu-mir-425	0.0052839	0.011704	0.876952	300	1	Crygf	0.0046109	0.011786	0.88407	300	3
Ehhadh	6	0.0047121	0.012344	0.89724	301	3	Elmo1	0.0053089	0.011747	0.876952	301	2	Eomes	0.0046336	0.011847	0.88407	301	3
Rhox3f	5	0.0047364	0.012398	0.89724	302	3	Sec24a	0.005326	0.011776	0.876952	302	2	Ikzf2	0.0046415	0.011864	0.88407	302	1
Gm11563	6	0.0047365	0.012399	0.89724	303	1	Olfr656	0.005354	0.011825	0.876952	303	1	Pde6d	0.0046483	0.011879	0.88407	303	2
Kcnn1	6	0.0047407	0.012407	0.89724	304	2	Ctsm	0.005354	0.011825	0.876952	304	1	mmu-mir-6337	0.0046503	0.011882	0.88407	304	1
Prmt6	6	0.0047483	0.012425	0.89724	305	3	Scn3b	0.005354	0.011825	0.876952	305	1	Srgap2	0.004676	0.011946	0.884784	305	3
Gm7073	6	0.0047609	0.012459	0.89724	306	2	Myeov2	0.0054267	0.01196	0.881172	306	2	Rprd2	0.004689	0.011978	0.884784	306	1
Theg	6	0.004784	0.012521	0.89724	307	2	Olfr969	0.0054267	0.01196	0.881172	307	2	1700029I15Rik	0.0046998	0.012009	0.884784	307	3
C1rl	6	0.0047947	0.012549	0.89724	308	3	Cypt15	0.0054489	0.012001	0.881301	308	1	Flt1	0.004784	0.012219	0.897309	308	1
Ptges3l	6	0.0048315	0.012628	0.89724	309	1	Trim31	0.0054964	0.012081	0.882886	309	1	Rex2	0.0048196	0.012286	0.899372	309	1
Tdrd12	6	0.0048858	0.012766	0.89724	310	3	Cml5	0.0055326	0.012136	0.882886	310	2	Pigk	0.004879	0.012399	0.901509	310	1
Tspan2	6	0.0048871	0.012769	0.89724	311	2	Hydin	0.0055439	0.012155	0.882886	311	1	mmu-mir-425	0.0049038	0.012437	0.901509	311	1
Sprr1b	6	0.0048984	0.01279	0.89724	312	3	mmu-mir-8105	0.0055552	0.012178	0.882886	312	2	9230110F15Rik	0.0049265	0.012473	0.901509	312	1
Rassf6	6	0.0049034	0.0128	0.89724	313	2	Olfr1454	0.005646	0.012329	0.886513	313	2	NonTargetingControlGuideForMouse_0340	0.0049486	0.012515	0.901509	313	1
Reps2	6	0.0049068	0.012809	0.89724	314	3	Papd4	0.0056592	0.012349	0.886513	314	2	mmu-mir-466b-1	0.0049623	0.012542	0.901509	314	1
Map3k4	6	0.0049265	0.012859	0.89724	315	1	Rps20	0.0056863	0.012394	0.886513	315	1	Gatad1	0.004974	0.012555	0.901509	315	1
Als2cl	6	0.0049524	0.012931	0.89724	316	3	Mptx2	0.0056977	0.012418	0.886513	316	2	Blmh	0.0050106	0.012621	0.90188	316	2
Jade1	6	0.004974	0.01298	0.89724	317	2	Gm20867	0.0057009	0.012424	0.886513	317	1	Olfr521	0.0050215	0.01264	0.90188	317	1
Nppa	6	0.0050024	0.013044	0.89724	318	2	Rmi1	0.0057338	0.012475	0.887337	318	1	Ppp1r27	0.005069	0.012718	0.902235	318	1
Ddx5	6	0.0050215	0.013092	0.89724	319	1	Slc23a3	0.0057813	0.012551	0.887392	319	1	Zfp182	0.0051165	0.012803	0.902235	319	1
Mau2	6	0.0050355	0.013129	0.89724	320	2	Ptpn13	0.0057827	0.012554	0.887392	320	2	Gm10267	0.0051777	0.012915	0.902235	320	2
Map6d1	6	0.0050522	0.013169	0.89724	321	2	Rbp2	0.0058138	0.012619	0.889177	321	2	Gm20867	0.0051781	0.012917	0.902235	321	1
Spock1	6	0.005069	0.013209	0.89724	322	1	NonTargetingControlGuideForMouse_0940	0.0058708	0.012716	0.893226	322	1	Zfp595	0.0051945	0.012943	0.902235	322	2
Klk1b3	6	0.0050824	0.013235	0.89724	323	3	Daw1	0.0059237	0.012811	0.896237	323	1	Etl4	0.0052114	0.012971	0.902235	323	2
Ccl12	6	0.0050841	0.013239	0.89724	324	3	Tsg101	0.0059711	0.012885	0.896237	324	1	Defb45	0.0052115	0.012971	0.902235	324	1
Sf3a1	6	0.0051165	0.013312	0.89724	325	3	Rhbdd1	0.0059929	0.012917	0.896237	325	2	Oas1b	0.005241	0.013023	0.902235	325	2
Myb	6	0.0051256	0.013333	0.89724	326	3	Tac1	0.0059929	0.012917	0.896237	326	2	Htra3	0.005259	0.013057	0.902235	326	2
mmu-mir-3535	4	0.0051572	0.013415	0.89724	327	1	Mrpl32	0.0060186	0.012962	0.896521	327	1	Slain1	0.0053047	0.013129	0.902235	327	2
Atg4c	6	0.005164	0.013433	0.89724	328	2	Rex2	0.0060563	0.013023	0.896521	328	1	Map2k7	0.0053065	0.013132	0.902235	328	1
Scrg1	6	0.0051707	0.013451	0.89724	329	3	Slc38a7	0.006066	0.01304	0.896521	329	2	Cbr4	0.0053132	0.013143	0.902235	329	2
Klhl15	6	0.0051777	0.013472	0.89724	330	3	Nek9	0.0061135	0.013113	0.898815	330	1	Carm1	0.005326	0.013163	0.902235	330	2
Spata31d1b	6	0.0052115	0.013544	0.89724	331	1	Kcnn4	0.0062084	0.013263	0.90071	331	1	Samd7	0.0054806	0.013426	0.913776	331	2
Clic4	6	0.0052283	0.013583	0.89724	332	2	Krtap3-1	0.0062158	0.013274	0.90071	332	2	Havcr2	0.0054935	0.013448	0.913776	332	2
Btnl1	6	0.0052368	0.013602	0.89724	333	2	3110001I22Rik	0.0062341	0.013308	0.90071	333	2	Olfr318	0.0054964	0.013453	0.913776	333	1
BC089597	6	0.0052372	0.013604	0.89724	334	3	Rpl4	0.0062558	0.013346	0.90071	334	1	mmu-mir-15a	0.0055441	0.013529	0.913776	334	2
Olfr473	6	0.0052495	0.013637	0.89724	335	2	Nxt1	0.0062663	0.01337	0.90071	335	2	Vmn1r60	0.0055914	0.013616	0.913776	335	1
Fgd2	6	0.005259	0.013659	0.89724	336	3	Kcnh1	0.0062755	0.01338	0.90071	336	2	Traf2	0.0056023	0.013633	0.913776	336	2
Taar7f	6	0.0052953	0.013746	0.89724	337	3	Clic4	0.0063217	0.01346	0.900976	337	2	Sash3	0.0056066	0.013639	0.913776	337	2
Nek1	6	0.0053047	0.013762	0.89724	338	3	Ptplad1	0.0063309	0.013481	0.900976	338	2	Hist1h2bl	0.0056204	0.013655	0.913776	338	1
Rmi1	6	0.0053065	0.013765	0.89724	339	1	Sdk1	0.0063507	0.013514	0.900976	339	1	Olfr3	0.0056548	0.013711	0.914849	339	2
Dnah8	6	0.0053184	0.013793	0.89724	340	3	Kcnk6	0.006368	0.013543	0.900976	340	2	Map2k3	0.0056863	0.013765	0.91574	340	1
Cables1	6	0.0053352	0.013832	0.89724	341	3	Ube2g1	0.0064471	0.01367	0.902622	341	2	Rpl10a	0.0057338	0.013842	0.917535	341	1
Ccdc39	6	0.0053352	0.013832	0.89724	342	3	mmu-mir-6337	0.0064553	0.013681	0.902622	342	1	Ctsc	0.0057517	0.013873	0.917535	342	2
Dgcr8	6	0.005354	0.013879	0.89724	343	1	2410015M20Rik	0.0065405	0.01382	0.902622	343	1	Pde6b	0.0057813	0.013914	0.917574	343	1
Zfp954	6	0.0053575	0.013888	0.89724	344	3	Samd7	0.0065455	0.013832	0.902622	344	2	Fbrsl1	0.005836	0.014011	0.921267	344	2
Nudt10	3	0.0053682	0.013909	0.89724	345	1	Pdlim2	0.006569	0.013876	0.902622	345	2	Dgcr8	0.0058762	0.014085	0.922008	345	1
Marveld2	6	0.0054308	0.014064	0.89724	346	3	Fam181b	0.0065879	0.013906	0.902622	346	1	mmu-mir-21b	0.0058854	0.014104	0.922008	346	2
Cep68	6	0.0054416	0.014096	0.89724	347	3	D17H6S53E	0.0066256	0.013967	0.902622	347	2	Dgcr2	0.0059237	0.014165	0.923317	347	1
NonTargetingControlGuideForMouse_0940	1	0.0054574	0.014136	0.89724	348	1	Carm1	0.0066351	0.013983	0.902622	348	2	Cacna2d4	0.0059711	0.014244	0.925317	348	1
Zdhhc4	6	0.005465	0.014153	0.89724	349	3	Hoxd13	0.0066354	0.013983	0.902622	349	1	mmu-mir-669l	0.0059916	0.014277	0.925317	349	2
Apoe	6	0.0054964	0.014236	0.89724	350	3	Cacna1g	0.0066493	0.014007	0.902622	350	2	Dnah7a	0.006066	0.014393	0.93017	350	1
Fam72a	6	0.0054964	0.014236	0.89724	351	2	Sv2b	0.006654	0.014013	0.902622	351	2	Zcchc9	0.0061677	0.014548	0.934842	351	2
Tmem177	6	0.0055282	0.014307	0.89724	352	2	Aptx	0.0066828	0.014055	0.902622	352	2	Zfp932	0.0061677	0.014548	0.934842	352	2
Fbxo18	6	0.0055326	0.014317	0.89724	353	2	Cacna2d4	0.0067302	0.014132	0.902622	353	2	Aptx	0.0062084	0.014609	0.93612	353	1
Spink11	5	0.0055864	0.014447	0.89724	354	3	Micu1	0.0067515	0.014166	0.902622	354	2	Mrpl32	0.0062558	0.01469	0.938622	354	1
Pcna	6	0.0056388	0.014583	0.89724	355	1	Pabpc5	0.0067515	0.014166	0.902622	355	2	Selo	0.0063033	0.014767	0.939683	355	1
Vmn1r119	2	0.005668	0.014644	0.89724	356	2	Phf23	0.0067777	0.014208	0.902728	356	2	Chrnb2	0.0063507	0.01485	0.939683	356	2
Pigk	6	0.0056863	0.014683	0.89724	357	1	Lpcat4	0.0068251	0.014285	0.903615	357	1	Cda	0.0063912	0.014919	0.939683	357	2
Adm2	6	0.0056987	0.014714	0.89724	358	2	4933422H20Rik	0.0068592	0.014356	0.903615	358	2	Vmn1r27	0.0063959	0.014924	0.939683	358	2
mmu-mir-7233	4	0.0057065	0.014727	0.89724	359	2	Ccr4	0.0068725	0.014384	0.903615	359	1	Vmn2r72	0.0063982	0.014928	0.939683	359	2
Gsr	6	0.0057813	0.014904	0.89724	360	3	3830403N18Rik	0.0069121	0.014448	0.903615	360	1	Vmn1r50	0.0064425	0.015014	0.939683	360	2
Olfr875	6	0.005796	0.014939	0.89724	361	2	Ints3	0.0069199	0.014461	0.903615	361	1	Olfr734	0.0064456	0.015017	0.939683	361	1
mmu-mir-15a	4	0.0058254	0.015016	0.89724	362	2	Zfp560	0.0069314	0.014474	0.903615	362	2	mmu-mir-1190	0.0065185	0.015139	0.939683	362	1
Izumo4	6	0.0058287	0.015024	0.89724	363	1	Olfr875	0.0069653	0.014536	0.903615	363	2	BC068157	0.0065405	0.015173	0.939683	363	1
Mylip	6	0.005836	0.015042	0.89724	364	3	Tespa1	0.0069674	0.014542	0.903615	364	1	Car9	0.0065525	0.015199	0.939683	364	2
Slc43a2	6	0.0058449	0.015066	0.89724	365	2	Vps4b	0.0070453	0.014683	0.904474	365	2	Grpr	0.0065525	0.015199	0.939683	365	2
Clmn	6	0.0058762	0.015142	0.89724	366	1	Vmn1r84	0.0070622	0.014715	0.904474	366	1	Umod	0.0065879	0.015252	0.939683	366	1
Apoc1	6	0.0058806	0.015153	0.89724	367	3	Rev3l	0.0070622	0.014715	0.904474	367	1	Leprel2	0.006602	0.015277	0.939683	367	2
Olfr853	6	0.0058964	0.015191	0.89724	368	3	Nphp4	0.0070622	0.014715	0.904474	368	1	Ccdc102a	0.0066354	0.015328	0.939683	368	1
Depdc5	6	0.0059299	0.015274	0.89724	369	2	Olfr1428	0.0071063	0.014788	0.90645	369	2	Clec2e	0.0066828	0.015397	0.939683	369	1
Maats1	6	0.0059409	0.015295	0.89724	370	3	Olfr531	0.0071454	0.014851	0.906661	370	2	Olfr493	0.0066967	0.015419	0.939683	370	2
Kcnj9	6	0.0059479	0.015308	0.89724	371	2	Olfr8	0.007157	0.014871	0.906661	371	2	P2ry2	0.0067302	0.015471	0.939683	371	1
Wfdc6a	6	0.0059524	0.015315	0.89724	372	2	Tvp23a	0.0072044	0.014955	0.90756	372	1	Sapcd1	0.0067586	0.015514	0.939683	372	2
Gtl3	6	0.0059704	0.015356	0.89724	373	3	Vamp3	0.0072092	0.014966	0.90756	373	2	Cnbp	0.0067777	0.01554	0.939683	373	1
Homer1	6	0.0059711	0.015357	0.89724	374	1	Olfr384	0.0072535	0.015044	0.907786	374	2	Fam178b	0.0068208	0.015608	0.939683	374	2
Kcnk6	6	0.0059884	0.015395	0.89724	375	2	Bcas1	0.0072585	0.015052	0.907786	375	2	Antxrl	0.0068251	0.015616	0.939683	375	1
Olfr1288	6	0.0060307	0.015494	0.89724	376	3	Wsb1	0.0072993	0.015124	0.907786	376	1	Tmem202	0.0068688	0.015706	0.939683	376	2
Crtc3	6	0.0060422	0.015517	0.89724	377	3	Nfya	0.0073467	0.015201	0.907786	377	1	Crtc3	0.0068725	0.015715	0.939683	377	1
Trim31	6	0.0060423	0.015518	0.89724	378	2	Usmg5	0.0073525	0.015215	0.907786	378	2	Ap3m2	0.0069199	0.01579	0.939683	378	1
Rprd1b	6	0.0060423	0.015518	0.89724	379	2	4930444G20Rik	0.0073525	0.015215	0.907786	379	2	Gm428	0.006936	0.015814	0.939683	379	1
P4ha3	6	0.0060528	0.015535	0.89724	380	3	Sash3	0.0073922	0.015287	0.907786	380	2	Ccdc172	0.0069507	0.015839	0.939683	380	2
Olfr135	6	0.0060834	0.015598	0.89724	381	2	Dnajc5g	0.0073941	0.015291	0.907786	381	1	Upk2	0.0069749	0.01588	0.939683	381	2
Copg1	6	0.0061077	0.015658	0.89724	382	3	Ebf2	0.0074671	0.015422	0.912688	382	2	Nrg2	0.0070148	0.015951	0.939683	382	1
Ltv1	6	0.0061107	0.015661	0.89724	383	2	Olfr853	0.0074889	0.015454	0.912688	383	2	Myl3	0.007038	0.015992	0.939683	383	2
Ptcra	6	0.0061135	0.015669	0.89724	384	1	Ggcx	0.0075363	0.015543	0.915165	384	1	Adcy10	0.007038	0.015992	0.939683	384	2
Nalcn	6	0.0061406	0.015735	0.89724	385	3	Umod	0.0075837	0.01563	0.915165	385	1	Anxa8	0.0070622	0.016036	0.939683	385	1
1810033B17Rik	6	0.006162	0.015783	0.89724	386	3	Olfr691	0.0076026	0.01566	0.915165	386	2	Olfr828	0.0070624	0.016036	0.939683	386	2
Prap1	6	0.0061756	0.015811	0.89724	387	3	Ccl6	0.0076127	0.01567	0.915165	387	2	Olfr1076	0.0071096	0.016117	0.941963	387	1
Ston1	6	0.0061785	0.015816	0.89724	388	3	Dgcr2	0.0076311	0.015698	0.915165	388	1	Sil1	0.0071601	0.016203	0.944588	388	2
mmu-mir-466i	3	0.0061997	0.015858	0.89724	389	1	Spata31d1b	0.0076784	0.015779	0.915473	389	1	Cypt15	0.0072044	0.016277	0.946435	389	1
Med19	6	0.0062066	0.015871	0.89724	390	2	Usp4	0.0076835	0.015785	0.915473	390	2	Snrpb2	0.0072518	0.016359	0.948807	390	1
Flywch2	6	0.0062084	0.015878	0.89724	391	2	Kcnip4	0.0077258	0.01586	0.917269	391	1	Usp35	0.0072993	0.016438	0.949523	391	1
Tmem41b	6	0.0062234	0.015908	0.89724	392	3	Zfp106	0.0077444	0.015897	0.917269	392	2	Rhox2d	0.0073079	0.016456	0.949523	392	2
Arsj	6	0.0062558	0.01598	0.89724	393	1	Gng8	0.0077851	0.015959	0.918537	393	2	Car14	0.0073941	0.016602	0.952601	393	1
Cnot8	6	0.0062571	0.015983	0.89724	394	2	Olfr1095	0.0078311	0.016029	0.920202	394	2	Tjap1	0.0074415	0.016676	0.952601	394	1
4933403O08Rik	6	0.0062912	0.016064	0.89724	395	3	4930568D16Rik	0.007868	0.016082	0.92073	395	1	2310002L09Rik	0.0074889	0.01676	0.952601	395	2
Mysm1	6	0.0063033	0.016092	0.89724	396	2	Aif1	0.0078874	0.01612	0.92073	396	2	H2-T22	0.0075054	0.016784	0.952601	396	1
Gbe1	6	0.0063128	0.016114	0.89724	397	3	Acy1	0.0079628	0.016252	0.923601	397	2	Smok3a	0.0075084	0.016788	0.952601	397	1
4930447C04Rik	6	0.0063402	0.016173	0.89724	398	2	Pipox	0.0079645	0.016254	0.923601	398	2	mmu-mir-6988	0.0075307	0.016826	0.952601	398	1
Olfr1023	6	0.0063448	0.016186	0.89724	399	3	Depdc7	0.0080101	0.016332	0.923601	399	1	Olfr853	0.0075363	0.016841	0.952601	399	1
Olfr1199	6	0.0063494	0.016201	0.89724	400	3	Lztr1	0.008011	0.016333	0.923601	400	2	mmu-mir-1901	0.0075777	0.016908	0.952601	400	2
Rbp2	6	0.0063495	0.016201	0.89724	401	2	Trpv1	0.0080575	0.016414	0.925645	401	2	Ptges3l	0.0075837	0.01692	0.952601	401	1
Trim11	6	0.0063507	0.016203	0.89724	402	2	Gm428	0.0081125	0.0165	0.925645	402	1	Pygm	0.00759	0.01693	0.952601	402	2
Slc15a3	6	0.0063603	0.016226	0.89724	403	3	NonTargetingControlGuideForMouse_0248	0.0081284	0.016531	0.925645	403	1	Olfr111	0.0076311	0.016988	0.95348	403	2
Cops8	6	0.0063623	0.016232	0.89724	404	3	Ccdc170	0.0081523	0.016574	0.925645	404	1	Rest	0.0076784	0.017063	0.955311	404	2
Svs2	6	0.0063982	0.016313	0.89724	405	1	Olfr1230	0.0081771	0.016618	0.925645	405	2	Cdkn2d	0.0077258	0.017143	0.95536	405	1
Fbrsl1	6	0.0064005	0.016321	0.89724	406	2	Wfdc15b	0.0081996	0.016652	0.925645	406	1	Wwc1	0.0077292	0.017148	0.95536	406	2
Atp2a2	6	0.0064456	0.016438	0.89724	407	1	Olfr45	0.0082032	0.016656	0.925645	407	2	Ints3	0.0077732	0.01722	0.955566	407	2
Tbc1d23	6	0.00645	0.016446	0.89724	408	3	Bcl7c	0.008247	0.016726	0.926152	408	1	4930474N05Rik	0.0078206	0.017294	0.955566	408	1
Zmynd19	6	0.0064565	0.016461	0.89724	409	2	Il1rapl1	0.008287	0.01679	0.926152	409	2	Olfr1489	0.0078515	0.017337	0.955566	409	2
Pcbd2	6	0.0064658	0.016481	0.89724	410	2	Gnai1	0.0082944	0.016803	0.926152	410	1	Phox2b	0.0078567	0.017347	0.955566	410	2
Ddx56	6	0.0064845	0.016524	0.89724	411	2	Cnot8	0.0083132	0.016829	0.926152	411	2	Tvp23a	0.007868	0.017363	0.955566	411	1
mmu-mir-3960	4	0.0064887	0.016539	0.89724	412	2	Gm136	0.0083418	0.016883	0.926908	412	1	Sema3c	0.0079154	0.017452	0.958101	412	1
Asb18	6	0.0064931	0.016544	0.89724	413	1	Tmem202	0.0083764	0.016938	0.927636	413	2	Trmt12	0.0079594	0.017532	0.958184	413	2
Fbxl21	6	0.006515	0.016597	0.89724	414	2	Zmynd19	0.0084134	0.016999	0.928744	414	2	Htr1b	0.0079645	0.017538	0.958184	414	2
mmu-mir-425	4	0.0065185	0.016605	0.89724	415	1	Naa20	0.0085786	0.01728	0.941847	415	1	Jade1	0.0080101	0.017618	0.960265	415	1
Ikzf2	6	0.0065405	0.016659	0.89724	416	2	Tuba8	0.0086259	0.017348	0.942638	416	1	Hrg	0.0080575	0.017691	0.960717	416	1
Cntn3	6	0.0065831	0.01676	0.89724	417	2	Olfr1034	0.0086733	0.01742	0.942638	417	1	Mapk1ip1l	0.0080705	0.017712	0.960717	417	2
Tespa1	6	0.0066354	0.016875	0.89724	418	1	Olfr596	0.0086745	0.01742	0.942638	418	1	Msra	0.0081354	0.017819	0.964221	418	2
Cbfa2t3	6	0.0066828	0.016978	0.89724	419	1	Olfr1243	0.0086984	0.017462	0.942638	419	2	Lmf2	0.0081996	0.01792	0.967355	419	1
Mecom	6	0.006692	0.016997	0.89724	420	3	Zfp160	0.008768	0.017582	0.94286	420	1	Sumo3	0.0082712	0.01803	0.970992	420	2
Hormad1	6	0.0067051	0.017032	0.89724	421	3	1700026D08Rik	0.0087764	0.017599	0.94286	421	2	4933422H20Rik	0.0083027	0.018074	0.971038	421	2
mmu-mir-1291	4	0.0067244	0.017082	0.89724	422	2	Fstl4	0.0088153	0.017669	0.94286	422	2	Adcyap1	0.0083891	0.018216	0.975645	422	1
Olfr1454	6	0.0067252	0.017083	0.89724	423	2	mmu-mir-467a-1	0.00882	0.017676	0.94286	423	1	Uba3	0.0084081	0.018246	0.975645	423	2
Pdcd6	6	0.0067302	0.017096	0.89724	424	1	Rbp1	0.008852	0.017726	0.94286	424	2	Scnm1	0.0084365	0.018293	0.97589	424	1
Csrp2	6	0.0067348	0.017103	0.89724	425	2	Pycrl	0.0088627	0.017747	0.94286	425	1	Olfr429	0.0084838	0.018372	0.97701	425	1
Ttc8	6	0.0067395	0.017115	0.89724	426	2	Zfp39	0.0088682	0.017758	0.94286	426	2	Fmod	0.0085141	0.018427	0.97701	426	2
mmu-mir-6537	4	0.00674	0.017116	0.89724	427	1	Zfp182	0.00891	0.017835	0.944779	427	1	Rgcc	0.0085247	0.018444	0.97701	427	2
Trerf1	6	0.0067411	0.017117	0.89724	428	3	Map2k4	0.008966	0.017926	0.945949	428	2	Cbx4	0.0085786	0.018529	0.97915	428	1
Pabpc1l	6	0.0067443	0.017125	0.89724	429	2	Gm13247	0.0089987	0.017982	0.945949	429	2	Psmb1	0.0086259	0.018605	0.97915	429	1
Pde6b	6	0.0067777	0.017197	0.89724	430	1	Rxfp1	0.0090047	0.017992	0.945949	430	1	Fbxo48	0.0086314	0.018614	0.97915	430	2
Il7r	6	0.0067854	0.017218	0.89724	431	3	Strn3	0.009052	0.01807	0.945949	431	1	Wnt16	0.0086733	0.018682	0.980416	431	1
Litaf	6	0.0067916	0.017229	0.89724	432	3	Olfr1223	0.0090533	0.018072	0.945949	432	2	Taf1	0.0087206	0.018756	0.982043	432	1
Pglyrp2	6	0.0067968	0.017236	0.89724	433	2	Olfr1082	0.0090994	0.018153	0.945949	433	1	Mfsd7a	0.008768	0.018831	0.982577	433	1
Lrrc16b	6	0.0068251	0.017304	0.89724	434	1	Ctsr	0.0091467	0.018236	0.945949	434	1	Vmn1r17	0.0087818	0.018858	0.982577	434	2
Nat9	6	0.0068288	0.017315	0.89724	435	3	Srsf4	0.0091905	0.018299	0.945949	435	2	Gpx6	0.0088153	0.018911	0.982577	435	1
Myoc	6	0.0068329	0.017327	0.89724	436	3	Pdgfc	0.009194	0.018307	0.945949	436	1	Rorc	0.0088627	0.018992	0.982577	436	1
Rab9	6	0.0068352	0.017335	0.89724	437	2	Acot3	0.0092236	0.01836	0.945949	437	2	Vamp3	0.0088682	0.019	0.982577	437	2
Olfr1416	6	0.0068688	0.017428	0.898656	438	2	Klhl23	0.0092401	0.01839	0.945949	438	2	Sppl2a	0.0088953	0.019044	0.982577	438	2
Mthfd2	6	0.0068725	0.017442	0.898656	439	2	Fkbp7	0.0092414	0.018391	0.945949	439	1	Kdelr3	0.00891	0.01907	0.982577	439	1
Blnk	6	0.0069016	0.017507	0.899249	440	3	Alkbh2	0.0092887	0.018452	0.945949	440	1	Tex22	0.0090047	0.019217	0.986778	440	2
Slc29a3	6	0.0069199	0.017548	0.899249	441	2	Bdh2	0.0092982	0.01847	0.945949	441	2	Nfya	0.009052	0.0193	0.986778	441	1
Tssk4	6	0.0069507	0.017629	0.899249	442	2	Ppp1r27	0.0093833	0.018605	0.945949	442	2	Zfp276	0.0090752	0.019343	0.986778	442	2
Olfr384	6	0.0069556	0.01764	0.899249	443	2	Meox1	0.0094009	0.018642	0.945949	443	2	Olfr1245	0.009174	0.019506	0.986778	443	2
Nlrp9a	6	0.0069674	0.017668	0.899249	444	1	Dnajc15	0.0094064	0.018651	0.945949	444	2	Kcnj9	0.009194	0.019537	0.986778	444	1
Ntf5	6	0.0069791	0.017695	0.899249	445	3	Ddx5	0.0094307	0.018683	0.945949	445	1	Igf2bp2	0.0092887	0.019687	0.986778	445	1
Prpf4	6	0.0070148	0.017785	0.899249	446	1	Il18rap	0.0094677	0.018734	0.945949	446	2	Dok6	0.0093231	0.019743	0.986778	446	2
Zfp763	6	0.0070622	0.017909	0.899249	447	2	Vwc2l	0.0094789	0.01875	0.945949	447	2	S100a7a	0.009336	0.019765	0.986778	447	1
Ush1g	6	0.0070867	0.01797	0.899249	448	2	Rassf10	0.0094845	0.018757	0.945949	448	2	Nucb2	0.0093397	0.01977	0.986778	448	2
Sptbn2	6	0.0070867	0.01797	0.899249	449	2	Spats2	0.0095253	0.018829	0.945949	449	1	Adck2	0.0094009	0.019872	0.986778	449	2
1810013L24Rik	6	0.0070867	0.01797	0.899249	450	2	Psma5	0.0095726	0.018904	0.945949	450	1	Aox1	0.009412	0.019888	0.986778	450	2
Myl1	6	0.0070867	0.01797	0.899249	451	2	Urad	0.0096199	0.018982	0.945949	451	1	Nme7	0.0094307	0.019913	0.986778	451	2
Fcer1a	6	0.0070867	0.01797	0.899249	452	2	H2-T24	0.0096359	0.019007	0.945949	452	2	Defb25	0.0094343	0.019918	0.986778	452	2
Rab8a	6	0.0071378	0.018088	0.903143	453	3	mmu-mir-5112	0.0097106	0.019127	0.945949	453	1	Olfr46	0.0094566	0.019948	0.986778	453	2
Ajap1	6	0.0072044	0.01825	0.908334	454	1	Grm7	0.0097146	0.019135	0.945949	454	1	mmu-mir-6992	0.0094581	0.019951	0.986778	454	1
Dcbld1	6	0.0072126	0.018272	0.908334	455	3	Crygf	0.0097601	0.019207	0.945949	455	2	Eltd1	0.0094677	0.019968	0.986778	455	2
Arhgef9	6	0.0072993	0.018465	0.914436	456	1	Gpx6	0.0097619	0.019209	0.945949	456	1	Wfdc15b	0.0095253	0.020057	0.986778	456	1
Jade2	6	0.0073377	0.018555	0.914436	457	3	Nfyc	0.0098092	0.01928	0.945949	457	1	Rbfa	0.0095726	0.020134	0.986778	457	1
Hagh	6	0.0073467	0.018577	0.914436	458	1	Spink5	0.0098168	0.01929	0.945949	458	2	Nudt10	0.0096158	0.020205	0.986778	458	1
Dnaaf2	6	0.0073659	0.018625	0.914436	459	3	Wdfy1	0.0098565	0.01935	0.945949	459	1	Kcnt2	0.0096199	0.020212	0.986778	459	1
Gm12253	6	0.0073873	0.018675	0.914436	460	2	Sema3c	0.0099038	0.01943	0.945949	460	1	Olfr214	0.0096673	0.020286	0.986778	460	1
Slc35f6	6	0.0073941	0.018694	0.914436	461	1	Scnm1	0.0099511	0.019515	0.945949	461	1	Etf1	0.0096838	0.020317	0.986778	461	2
Olfr1238	6	0.0074007	0.018707	0.914436	462	3	Htr1d	0.0099535	0.019519	0.945949	462	2	Fkbp1b	0.0097146	0.020364	0.986778	462	1
Krt9	6	0.0074247	0.018764	0.914436	463	3	Lce6a	0.0099984	0.019592	0.945949	463	1	Nexn	0.0097601	0.020435	0.986778	463	2
Atp2c2	6	0.0074269	0.018767	0.914436	464	3	Fbxo25	0.010088	0.019746	0.945949	464	2	Vmn1r78	0.0098092	0.020517	0.986778	464	1
Slc26a7	6	0.0074415	0.018799	0.914436	465	1	Nup85	0.010149	0.019845	0.945949	465	2	4632434I11Rik	0.0098993	0.020668	0.986778	465	2
Ap1m2	6	0.0074889	0.018916	0.915027	466	2	Rnf38	0.01023	0.019971	0.945949	466	2	Rbm34	0.0098993	0.020668	0.986778	466	2
Olfr309	6	0.0075363	0.019032	0.915027	467	1	Dnase1l1	0.010334	0.020155	0.945949	467	2	Iars	0.0098993	0.020668	0.986778	467	2
Tm9sf4	6	0.0075388	0.019035	0.915027	468	3	Naca	0.0104	0.020264	0.945949	468	1	Olfr466	0.0098993	0.020668	0.986778	468	2
Sval2	6	0.007541	0.01904	0.915027	469	3	Mettl8	0.0104	0.020264	0.945949	469	1	Cbx2	0.0098993	0.020668	0.986778	469	2
Spats2	6	0.0075642	0.019094	0.915027	470	3	Pfn2	0.0104	0.020264	0.945949	470	1	Mxd4	0.0099511	0.020743	0.986778	470	1
Nt5c1b	6	0.007573	0.019115	0.915027	471	3	Speer4a	0.0104	0.020264	0.945949	471	1	mmu-mir-7219	0.010009	0.020838	0.986778	471	2
Gm13088	6	0.0075837	0.019139	0.915027	472	1	Cdc26	0.0104	0.020264	0.945949	472	1	Oca2	0.010022	0.02086	0.986778	472	2
Arhgef39	6	0.0075874	0.019146	0.915027	473	3	Zfp622	0.0104	0.020264	0.945949	473	1	mmu-mir-346	0.010057	0.020912	0.986778	473	2
Pank2	6	0.0076229	0.019223	0.915027	474	3	Serpina3b	0.0104	0.020264	0.945949	474	2	Prtg	0.010057	0.020912	0.986778	474	2
Olfr497	6	0.0076784	0.019344	0.915027	475	2	Trim33	0.0104	0.020264	0.945949	475	1	Meox1	0.010068	0.02093	0.986778	475	2
Olfr284	6	0.0076784	0.019344	0.915027	476	1	Mmp2	0.0104	0.020264	0.945949	476	1	Olfr473	0.010093	0.020973	0.986778	476	1
Olfr566	6	0.0076936	0.019371	0.915027	477	2	Tbrg4	0.0104	0.020264	0.945949	477	1	Prdm11	0.01014	0.021037	0.986778	477	2
Psmd3	6	0.0077131	0.019418	0.915027	478	3	Fezf1	0.0104	0.020264	0.945949	478	1	Rprml	0.010143	0.021041	0.986778	478	2
Vmn1r17	6	0.0077131	0.019418	0.915027	479	3	Pomt1	0.0104	0.020264	0.945949	479	1	Tpsab1	0.01016	0.021067	0.986778	479	2
Jam3	6	0.0077131	0.019418	0.915027	480	3	Nsg2	0.0104	0.020264	0.945949	480	1	Dvl3	0.010188	0.021112	0.986778	480	1
Gpatch8	6	0.0078187	0.019661	0.922836	481	3	Scfd2	0.010462	0.020364	0.945949	481	2	Mcm4	0.010206	0.021145	0.986778	481	2
Nupl1	6	0.0078206	0.019665	0.922836	482	1	Prss34	0.010503	0.020438	0.945949	482	2	Ccdc120	0.010206	0.021145	0.986778	482	2
Syne1	6	0.0078669	0.019765	0.924354	483	2	Ltv1	0.010609	0.020616	0.945949	483	2	Camk1	0.010235	0.021201	0.986778	483	2
Fhdc1	6	0.0078922	0.019825	0.924354	484	3	mmu-mir-7649	0.010664	0.020701	0.945949	484	1	Taar7f	0.010259	0.021241	0.986778	484	2
Fhl2	6	0.0079154	0.019893	0.924354	485	1	Olfr1208	0.010721	0.020796	0.945949	485	2	Xpc	0.010282	0.021281	0.986778	485	1
Dpysl3	6	0.007924	0.019913	0.924354	486	3	Sval2	0.010802	0.020921	0.945949	486	1	Ptgs2	0.010314	0.021332	0.986778	486	2
Ndst4	6	0.0079445	0.019956	0.924354	487	3	mmu-mir-495	0.010826	0.020964	0.945949	487	2	Olfr135	0.010377	0.021438	0.986778	487	2
Zfp160	6	0.0079628	0.019999	0.924354	488	1	Tex22	0.010849	0.021002	0.945949	488	2	Olfr1208	0.010424	0.021517	0.986778	488	1
Pdcd11	6	0.0080101	0.020108	0.924354	489	1	Kpna3	0.010923	0.021122	0.945949	489	2	Plcz1	0.010512	0.021661	0.986778	489	2
3830403N18Rik	3	0.0080274	0.020144	0.924354	490	1	Olfr111	0.010944	0.021153	0.945949	490	1	Cyld	0.010519	0.021672	0.986778	490	1
Cntnap5c	6	0.0080336	0.020162	0.924354	491	3	Trim43a	0.010991	0.021242	0.945949	491	1	Myot	0.010613	0.021828	0.986778	491	1
Vsig8	6	0.0080519	0.020209	0.924354	492	3	Zfp653	0.011012	0.021274	0.945949	492	2	Elmo1	0.010627	0.021852	0.986778	492	2
Prkab2	6	0.0080731	0.020256	0.924354	493	2	Fam92a	0.011012	0.021274	0.945949	493	2	Cpe	0.010644	0.021881	0.986778	493	2
Cnot6l	6	0.0081049	0.020331	0.924354	494	1	Jakmip2	0.011012	0.021274	0.945949	494	2	Lypd6b	0.01065	0.021889	0.986778	494	2
Sde2	6	0.0081464	0.020425	0.924354	495	3	Tlr8	0.011012	0.021274	0.945949	495	2	Gnas	0.01066	0.021907	0.986778	495	1
Gtf3c1	6	0.0081523	0.020442	0.924354	496	2	Gm14325	0.011039	0.021317	0.945949	496	1	5730559C18Rik	0.010668	0.021917	0.986778	496	2
Alkbh2	6	0.0081766	0.020495	0.924354	497	3	Aars	0.011086	0.021388	0.945949	497	1	Rsbn1	0.010674	0.021926	0.986778	497	2
Gm21949	6	0.0081812	0.020502	0.924354	498	3	Olfr561	0.011133	0.021467	0.945949	498	1	Papl	0.010708	0.021988	0.986778	498	1
D17H6S53E	6	0.008198	0.020541	0.924354	499	3	Nrg2	0.011251	0.021663	0.945949	499	1	Lztr1	0.010798	0.022113	0.986778	499	2
Gmfg	6	0.0082009	0.020545	0.924354	500	3	Abhd15	0.011251	0.021663	0.945949	500	2	Nrn1l	0.010857	0.022212	0.986778	500	2
Blmh	6	0.008245	0.020651	0.924354	501	2	Rab32	0.011251	0.021663	0.945949	501	1	1700028K03Rik	0.010873	0.022238	0.986778	501	1
Fbxo40	6	0.0082451	0.020651	0.924354	502	3	Pptc7	0.011251	0.021663	0.945949	502	1	Vmn1r206	0.010873	0.022238	0.986778	502	1
Kcnn4	6	0.0082503	0.020662	0.924354	503	2	mmu-mir-6992	0.011383	0.021885	0.945949	503	1	Cndp1	0.010873	0.022238	0.986778	503	1
Kirrel	6	0.0082813	0.020738	0.924354	504	3	Nagk	0.011417	0.021948	0.945949	504	1	Wdr19	0.010873	0.022238	0.986778	504	1
Cdk5r2	6	0.0083187	0.020822	0.924354	505	3	Il12rb1	0.011441	0.021987	0.945949	505	2	Ubl4b	0.010873	0.022238	0.986778	505	1
A230050P20Rik	6	0.0083305	0.020855	0.924354	506	3	Meis2	0.011464	0.022028	0.945949	506	1	Itpr3	0.010873	0.022238	0.986778	506	2
1110032A03Rik	6	0.0083352	0.020866	0.924354	507	3	Ifitm10	0.011502	0.022102	0.945949	507	2	Suco	0.010875	0.022239	0.986778	507	2
Map2k7	6	0.0083418	0.020879	0.924354	508	1	Akr1c6	0.011511	0.022112	0.945949	508	1	Sec13	0.010953	0.022361	0.986778	508	2
Olfr623	6	0.0083445	0.020886	0.924354	509	3	Gstp1	0.011558	0.022183	0.945949	509	1	Fmo3	0.010989	0.022429	0.986778	509	2
Rara	6	0.0083845	0.020966	0.924354	510	3	Olfr1537	0.01157	0.022204	0.945949	510	2	Tnn	0.011039	0.022507	0.986778	510	1
Capn5	6	0.0083891	0.020978	0.924354	511	2	Eif4g3	0.011594	0.022245	0.945949	511	2	Nudt13	0.011108	0.022617	0.986778	511	2
Mxd4	6	0.0084046	0.021012	0.924354	512	3	Wdr77	0.011605	0.02226	0.945949	512	1	Foxa3	0.011114	0.022625	0.986778	512	2
Chrnb2	6	0.0084365	0.021077	0.924354	513	1	Fkbp3	0.011653	0.022336	0.945949	513	2	Ccnt2	0.011133	0.022658	0.986778	513	1
Creb1	6	0.0084398	0.021084	0.924354	514	2	Gm15023	0.011664	0.02235	0.945949	514	1	Ly96	0.011145	0.022675	0.986778	514	2
Smim8	6	0.008461	0.021136	0.924354	515	2	Myl1	0.0117	0.022413	0.945949	515	1	Sv2b	0.011151	0.022686	0.986778	515	2
Lamp1	6	0.0084767	0.021176	0.924354	516	3	Fam133b	0.011717	0.022438	0.945949	516	2	Cul7	0.01118	0.022731	0.986778	516	1
2410015M20Rik	6	0.0084838	0.021193	0.924354	517	1	Pin1rt1	0.011735	0.022474	0.945949	517	2	Vmn1r217	0.011228	0.0228	0.986778	517	2
mmu-mir-199b	3	0.0085017	0.021241	0.924354	518	1	Abhd13	0.011747	0.022491	0.945949	518	2	Hck	0.011271	0.022871	0.986778	518	2
Frrs1l	6	0.0085088	0.021256	0.924354	519	2	Acot1	0.011816	0.022615	0.945949	519	2	Aadacl2	0.011302	0.022917	0.986778	519	2
Scn2a1	6	0.0085432	0.02134	0.924354	520	3	Prmt8	0.011847	0.02267	0.945949	520	2	Slc5a7	0.011308	0.022928	0.986778	520	2
Slc38a7	6	0.008562	0.021377	0.924354	521	2	Pou6f1	0.011859	0.02269	0.945949	521	2	Krtap19-9b	0.011322	0.022948	0.986778	521	1
Papola	6	0.0085671	0.021388	0.924354	522	3	mmu-mir-3535	0.011887	0.022731	0.945949	522	1	Mettl9	0.011417	0.023115	0.986778	522	1
Tas2r137	6	0.008578	0.021412	0.924354	523	2	Rps13	0.011889	0.022735	0.945949	523	1	Atp2c2	0.011453	0.023174	0.986778	523	2
Shd	6	0.0085786	0.021414	0.924354	524	1	P2ry12	0.011936	0.022821	0.945949	524	1	Gm8298	0.011464	0.023193	0.986778	524	2
Rpl4	6	0.0086259	0.021516	0.925345	525	1	Khdrbs1	0.011983	0.022898	0.945949	525	2	Bcl7c	0.011511	0.023274	0.986778	525	1
Zfp874a	6	0.0086421	0.021547	0.925345	526	2	Stam	0.011983	0.022899	0.945949	526	1	NonTargetingControlGuideForMouse_0543	0.011539	0.023315	0.986778	526	1
Smad9	6	0.0086653	0.0216	0.925345	527	3	Hrg	0.012031	0.022967	0.945949	527	1	Esr1	0.011605	0.023428	0.986778	527	1
Vmn1r197	6	0.0086733	0.021618	0.925345	528	1	Cspg4	0.012045	0.022992	0.945949	528	2	Topaz1	0.011612	0.02344	0.986778	528	2
Sumf2	6	0.0087496	0.021795	0.925345	529	3	Cnbp	0.012078	0.023052	0.945949	529	1	Olfr138	0.011653	0.023503	0.986778	529	1
Dennd2a	6	0.008768	0.021837	0.925345	530	1	Rpl5	0.012089	0.023071	0.945949	530	2	mmu-mir-6938	0.011684	0.023546	0.986778	530	2
Phf23	6	0.0088153	0.021948	0.925345	531	1	Heatr5b	0.012125	0.023132	0.945949	531	1	Fkbp3	0.011735	0.023632	0.986778	531	2
Prmt8	6	0.0088175	0.021953	0.925345	532	3	Svep1	0.012152	0.023185	0.945949	532	2	Vmn2r89	0.011735	0.023632	0.986778	532	2
Lat2	6	0.0088627	0.022062	0.925345	533	1	Lyplal1	0.012161	0.023202	0.945949	533	2	P2ry12	0.011747	0.023652	0.986778	533	1
Gm17384	6	0.0088637	0.022065	0.925345	534	3	Ndufb5	0.012161	0.023202	0.945949	534	2	Gm14325	0.011794	0.023733	0.986778	534	1
Cypt14	6	0.00891	0.022169	0.925345	535	1	Pyroxd2	0.012219	0.023306	0.945949	535	1	Msl3l2	0.011828	0.023794	0.986778	535	2
Spag7	6	0.0089573	0.022277	0.925345	536	1	Foxr2	0.012267	0.023383	0.945949	536	2	Olfr993	0.011859	0.023846	0.986778	536	2
Rex2	2	0.0089866	0.022345	0.925345	537	1	Rbm15	0.012312	0.023463	0.945949	537	2	Arrdc4	0.011889	0.02389	0.986778	537	1
Cacna1g	6	0.0090041	0.022383	0.925345	538	2	Il1rl1	0.012312	0.023463	0.945949	538	2	mmu-mir-758	0.011895	0.023899	0.986778	538	2
Olfr1014	6	0.0090047	0.022385	0.925345	539	1	5430401F13Rik	0.012312	0.023463	0.945949	539	2	Calu	0.011896	0.0239	0.986778	539	2
Gm20867	3	0.009047	0.022478	0.925345	540	1	Hyal5	0.012312	0.023463	0.945949	540	2	Bmx	0.011936	0.023968	0.986778	540	1
Tubb2b	6	0.009052	0.022489	0.925345	541	2	Olfr599	0.012312	0.023463	0.945949	541	2	Vmn1r70	0.011983	0.024044	0.986778	541	1
BC100530	4	0.0090598	0.022507	0.925345	542	2	Lrp3	0.012337	0.023509	0.945949	542	1	Prnp	0.012031	0.024113	0.986778	542	1
Trdn	6	0.0090749	0.022542	0.925345	543	3	Cln5	0.012337	0.023509	0.945949	543	1	mmu-mir-6237	0.012071	0.024183	0.986778	543	2
Bpifb1	6	0.0090872	0.022572	0.925345	544	3	Nme7	0.012408	0.023615	0.945949	544	1	Zc3h12c	0.012078	0.024194	0.986778	544	1
Ccs	6	0.0090994	0.022604	0.925345	545	2	Arhgef9	0.012455	0.023698	0.945949	545	2	Aoc1	0.012083	0.024203	0.986778	545	2
mmu-mir-3473c	4	0.0091107	0.022627	0.925345	546	2	Olfr473	0.012503	0.023774	0.945949	546	2	Tomm34	0.012095	0.024225	0.986778	546	2
Foxa3	6	0.0091218	0.02265	0.925345	547	2	Arl6	0.012517	0.023797	0.945949	547	2	Rassf9	0.012108	0.024247	0.986778	547	2
F830045P16Rik	6	0.0091244	0.022658	0.925345	548	3	Wfdc6a	0.012524	0.023808	0.945949	548	2	Myoc	0.012171	0.024351	0.986778	548	2
Gabra1	6	0.0091355	0.022683	0.925345	549	2	Acsbg2	0.012549	0.023851	0.945949	549	2	Wsb1	0.012172	0.024354	0.986778	549	1
Tcf12	6	0.0091455	0.022707	0.925345	550	3	Prkra	0.01255	0.023852	0.945949	550	1	Sult1c1	0.012183	0.024367	0.986778	550	2
Depdc7	6	0.0091467	0.02271	0.925345	551	1	Cables1	0.012594	0.02392	0.945949	551	2	Opn1sw	0.012214	0.024412	0.986778	551	2
Vmn1r78	6	0.009194	0.022815	0.925345	552	1	Rpl10a	0.012597	0.023922	0.945949	552	1	Mical1	0.012219	0.024421	0.986778	552	1
Fam181b	6	0.0092414	0.022931	0.925345	553	1	Gpr52	0.012644	0.023989	0.945949	553	1	Sox30	0.012233	0.024441	0.986778	553	2
Wdr44	6	0.0092887	0.023023	0.925345	554	1	Stx11	0.012677	0.024047	0.945949	554	2	NonTargetingControlGuideForMouse_0610	0.012254	0.024473	0.986778	554	1
NonTargetingControlGuideForMouse_0248	1	0.009305	0.023063	0.925345	555	1	Ucp2	0.012691	0.024071	0.945949	555	1	Galnt12	0.012267	0.024497	0.986778	555	1
Zic4	6	0.0093117	0.023078	0.925345	556	3	mmu-mir-5121	0.012709	0.024102	0.945949	556	2	Gprin1	0.012296	0.024545	0.986778	556	2
AW549877	6	0.009312	0.02308	0.925345	557	2	Dcaf10	0.012739	0.024156	0.945949	557	1	mmu-mir-878	0.012297	0.024545	0.986778	557	1
Pou6f1	6	0.0093176	0.023091	0.925345	558	2	Mlf1	0.012753	0.024176	0.945949	558	2	Psma5	0.012314	0.024571	0.986778	558	2
Olfr669	6	0.0093342	0.023131	0.925345	559	2	Tnfsf15	0.012786	0.024226	0.945949	559	1	Atp2b4	0.012361	0.024651	0.986778	559	1
Grin2b	6	0.009336	0.023133	0.925345	560	1	Tdpoz1	0.012798	0.024252	0.945949	560	2	Luc7l	0.012372	0.024664	0.986778	560	2
Saa1	5	0.0093394	0.023141	0.925345	561	2	mmu-mir-547	0.012832	0.024309	0.945949	561	1	Dbx1	0.012408	0.02472	0.986778	561	1
Syde2	6	0.0093619	0.023196	0.925345	562	2	Leprotl1	0.012833	0.024311	0.945949	562	1	Olfr322	0.012441	0.024777	0.986778	562	2
Lig4	6	0.0093696	0.023211	0.925345	563	3	Cd44	0.012837	0.024318	0.945949	563	2	Gm13177	0.012455	0.024803	0.986778	563	2
mmu-mir-6356	4	0.0093747	0.023222	0.925345	564	2	2017-03-07	0.012843	0.024325	0.945949	564	2	Serpinb10	0.012503	0.02488	0.986778	564	2
Fbxo28	6	0.0094239	0.023337	0.925345	565	3	Olfr1076	0.01288	0.02438	0.945949	565	1	Epha6	0.012511	0.024895	0.986778	565	2
Rxfp1	6	0.0094307	0.023347	0.925345	566	1	Tstd1	0.012927	0.024459	0.945949	566	1	Metap1d	0.012517	0.024906	0.986778	566	2
Zfp106	6	0.0094566	0.023396	0.925345	567	2	Swap70	0.01294	0.024475	0.945949	567	2	Tmbim1	0.012581	0.02501	0.986778	567	2
mmu-mir-7043	4	0.0094581	0.0234	0.925345	568	1	Slc30a10	0.013017	0.024602	0.945949	568	2	Herc4	0.012597	0.025035	0.986778	568	1
Tsg101	6	0.009478	0.023441	0.925345	569	1	NonTargetingControlGuideForMouse_0286	0.013033	0.024632	0.945949	569	1	Olfr430	0.012606	0.025054	0.986778	569	2
Praf2	6	0.0095069	0.023512	0.925345	570	2	mmu-mir-6356	0.013037	0.024638	0.945949	570	1	mmu-mir-344g	0.012643	0.025106	0.986778	570	1
Dnajc5g	6	0.0095253	0.023557	0.925345	571	2	Fbxl2	0.013069	0.024684	0.945949	571	2	Pdgfc	0.012644	0.025108	0.986778	571	1
Olfr1095	6	0.0095293	0.023567	0.925345	572	2	Pank2	0.013075	0.024693	0.945949	572	2	Hopx	0.012677	0.025161	0.986778	572	2
Zfp599	6	0.0095446	0.023602	0.925345	573	3	mmu-mir-346	0.013076	0.024694	0.945949	573	2	Has3	0.012691	0.025185	0.986778	573	1
Smarca5	6	0.0095726	0.023668	0.925345	574	1	Wnt10b	0.013108	0.024752	0.945949	574	2	S100b	0.012739	0.025266	0.986778	574	1
Gm853	6	0.0095881	0.023712	0.925345	575	2	Cul7	0.013116	0.024764	0.945949	575	1	Zfp866	0.012786	0.025331	0.986778	575	1
Lrrc42	6	0.0096022	0.023746	0.925345	576	2	Ift43	0.013163	0.024848	0.945949	576	1	Zadh2	0.01288	0.025477	0.986778	576	1
Zmym5	6	0.0096111	0.023763	0.925345	577	3	Pex19	0.013182	0.024882	0.945949	577	2	Pycrl	0.012927	0.025558	0.986778	577	2
mmu-mir-6337	4	0.0096159	0.023775	0.925345	578	1	Macrod1	0.01321	0.024937	0.945949	578	1	Myeov2	0.012927	0.025559	0.986778	578	2
Ctsll3	6	0.0096573	0.023859	0.925345	579	3	Traf2	0.013238	0.024973	0.945949	579	2	Zfp72	0.012956	0.0256	0.986778	579	2
Prkra	6	0.0096673	0.023879	0.925345	580	1	Rasip1	0.013258	0.025005	0.945949	580	1	Araf	0.012975	0.025633	0.986778	580	1
Btf3	6	0.0096979	0.023953	0.925345	581	2	Cdkn2d	0.013305	0.025086	0.945949	581	1	Gfra3	0.012978	0.02564	0.986778	581	2
Slc24a5	6	0.0097146	0.023989	0.925345	582	2	C87977	0.013352	0.025168	0.945949	582	1	Gm7073	0.013022	0.025708	0.986778	582	1
4921530D09Rik	6	0.0097318	0.024024	0.925345	583	3	Wisp3	0.013375	0.025202	0.945949	583	2	Zfp748	0.013049	0.025754	0.986778	583	2
Olfr150	6	0.009732	0.024024	0.925345	584	3	Zmym5	0.013427	0.025286	0.945949	584	2	Rhbdd1	0.013069	0.02578	0.986778	584	1
Vmn1r5	6	0.0097545	0.024074	0.925345	585	2	Slc7a14	0.013446	0.025324	0.945949	585	1	Olfr1428	0.013082	0.025801	0.986778	585	2
Olfr1223	6	0.0097771	0.02413	0.925345	586	2	Adk	0.013447	0.025325	0.945949	586	2	Olfr623	0.013101	0.02583	0.986778	586	2
Cacng7	6	0.0097993	0.02417	0.925345	587	3	Surf4	0.013466	0.02536	0.945949	587	2	Epn3	0.013116	0.025851	0.986778	587	1
Cenpt	6	0.0098092	0.024193	0.925345	588	1	Fam209	0.013541	0.025483	0.945949	588	1	Ear11	0.013163	0.025926	0.986778	588	1
Hint2	6	0.0098096	0.024194	0.925345	589	3	Slc4a5	0.013545	0.025486	0.945949	589	2	Olfr1328	0.013192	0.025971	0.986778	589	2
Rit2	6	0.0098168	0.024208	0.925345	590	2	Clec2e	0.013588	0.02555	0.945949	590	1	Mrpl40	0.01321	0.026015	0.986778	590	1
mmu-mir-7683	4	0.0098219	0.024217	0.925345	591	2	Hoxd12	0.013635	0.025617	0.945949	591	2	Cpne4	0.013258	0.026087	0.986778	591	1
Ccdc25	6	0.0098382	0.024258	0.925345	592	3	Smok3a	0.013645	0.025632	0.945949	592	1	Klk1b11	0.013303	0.026154	0.986778	592	2
Bcl7c	6	0.0098565	0.024306	0.925345	593	1	mmu-mir-344g	0.013651	0.02564	0.945949	593	1	Olfr15	0.013305	0.026158	0.986778	593	1
Vmn2r23	6	0.009868	0.024334	0.925345	594	2	Vmn1r68	0.013651	0.025642	0.945949	594	2	Bcan	0.013352	0.026242	0.986778	594	2
Dnajc15	6	0.0098851	0.024376	0.925345	595	2	Slc11a1	0.013657	0.025651	0.945949	595	2	Sema3f	0.013358	0.02625	0.986778	595	2
Npy	6	0.0098908	0.024389	0.925345	596	2	Ppp1r3b	0.013682	0.025696	0.945949	596	1	Slc30a10	0.013388	0.026302	0.986778	596	2
Kdm4a	6	0.0099038	0.024423	0.925345	597	1	Atp2c2	0.01371	0.02575	0.945949	597	2	Rhebl1	0.013399	0.026318	0.986778	597	1
Edar	6	0.0099364	0.024501	0.926453	598	2	Gjb1	0.013729	0.025781	0.945949	598	1	Sync	0.013427	0.026362	0.986778	598	2
Actr2	6	0.0099511	0.024534	0.926453	599	1	Defb34	0.013777	0.02586	0.945949	599	2	1190003K10Rik	0.013493	0.026467	0.986778	599	1
Fam227b	6	0.0099707	0.024586	0.92684	600	2	Olfr91	0.013823	0.025933	0.945949	600	1	Cfc1	0.013499	0.026477	0.986778	600	2
Daw1	6	0.0099984	0.024647	0.927588	601	2	mmu-mir-15a	0.013855	0.025976	0.945949	601	2	1700003M02Rik	0.013539	0.026545	0.986778	601	2
Fam189a1	6	0.010037	0.024731	0.928403	602	3	mmu-mir-93	0.013871	0.026	0.945949	602	1	Ndfip1	0.013541	0.026547	0.986778	602	1
Vmn2r16	6	0.010045	0.02475	0.928403	603	2	Fam105b	0.013918	0.026081	0.945949	603	1	Cdip1	0.013588	0.02662	0.986778	603	1
Crhbp	6	0.01014	0.024965	0.929553	604	1	Prtg	0.013936	0.026113	0.945949	604	2	Nek9	0.013635	0.026683	0.986778	604	2
Cog3	6	0.010183	0.025059	0.929553	605	2	Tnfrsf8	0.013949	0.026134	0.945949	605	2	Eif4a2	0.013682	0.026756	0.986778	605	1
Stk17b	6	0.010188	0.025068	0.929553	606	1	Mrpl40	0.013965	0.026165	0.945949	606	1	Rpl37	0.01372	0.026833	0.986778	606	2
Ccnyl1	6	0.010224	0.025155	0.929553	607	3	Stox2	0.014003	0.026227	0.945949	607	2	Gch1	0.01372	0.026833	0.986778	607	2
Dram2	6	0.01023	0.025172	0.929553	608	3	P2ry2	0.014012	0.026249	0.945949	608	1	Ykt6	0.01372	0.026833	0.986778	608	2
2017-09-06	6	0.010232	0.025175	0.929553	609	2	Nat1	0.014059	0.026326	0.945949	609	1	Prss44	0.013823	0.026997	0.986778	609	1
Olfr937	6	0.010235	0.025182	0.929553	610	1	Zfp932	0.014106	0.026407	0.945949	610	1	mmu-mir-7649	0.01384	0.027017	0.986778	610	1
Akt1	6	0.010264	0.025259	0.929553	611	2	Rnf34	0.014153	0.026475	0.945949	611	1	Dlx4	0.013903	0.027118	0.986778	611	2
Hoxd13	6	0.010282	0.025301	0.929553	612	1	C77370	0.014201	0.026549	0.945949	612	1	Pigp	0.013918	0.027143	0.986778	612	1
Adam33	6	0.010317	0.025379	0.929553	613	2	Noxred1	0.014211	0.026566	0.945949	613	2	2017-03-04	0.013929	0.02716	0.986778	613	2
Dhx58	6	0.010324	0.025391	0.929553	614	3	BC117090	0.014291	0.02671	0.945949	614	2	Trim31	0.013965	0.027221	0.986778	614	2
Abcc6	6	0.010329	0.025406	0.929553	615	1	Ndufv3	0.014295	0.026716	0.945949	615	1	mmu-mir-7650	0.013966	0.027222	0.986778	615	2
Rasal2	6	0.01034	0.025437	0.929553	616	3	Vmn1r173	0.014318	0.026756	0.945949	616	2	Kcnj11	0.013989	0.027256	0.986778	616	2
Vmn2r88	6	0.010342	0.025443	0.929553	617	3	Ogfod2	0.014342	0.026793	0.945949	617	1	Prmt8	0.014003	0.027283	0.986778	617	2
Naa30	6	0.010345	0.025448	0.929553	618	3	Coro1a	0.014352	0.026807	0.945949	618	2	Olfr1453	0.014012	0.027301	0.986778	618	2
Upk2	6	0.010364	0.025495	0.929553	619	3	Asrgl1	0.014359	0.026819	0.945949	619	2	Zfp202	0.014043	0.027359	0.986778	619	2
mmu-mir-5112	4	0.010373	0.025515	0.929553	620	2	Htra3	0.014389	0.026863	0.945949	620	1	Ube2v1	0.014059	0.027384	0.986778	620	1
Izumo1	6	0.010377	0.025521	0.929553	621	1	Slc25a54	0.014399	0.026881	0.945949	621	2	Ctse	0.014106	0.027459	0.986778	621	1
Ap1g1	6	0.01042	0.025613	0.929844	622	3	Nadk	0.014406	0.026892	0.945949	622	2	Slc12a3	0.014117	0.027476	0.986778	622	2
Morf4l1	6	0.010424	0.025621	0.929844	623	1	Myl6	0.014436	0.026936	0.945949	623	1	BC117090	0.014143	0.02752	0.986778	623	2
1700123K08Rik	6	0.010439	0.025652	0.929844	624	2	Anxa8	0.014483	0.027013	0.945949	624	1	mmu-mir-467a-1	0.014154	0.027536	0.986778	624	1
Ints3	6	0.010471	0.025731	0.93117	625	1	Adck2	0.014494	0.027027	0.945949	625	2	Olfr8	0.014201	0.027605	0.986778	625	1
Gfra3	6	0.010515	0.025839	0.93117	626	2	Cxcr4	0.014549	0.027112	0.945949	626	2	Vmn1r66	0.014211	0.027622	0.986778	626	2
Gstp1	6	0.010519	0.025848	0.93117	627	1	mmu-mir-1902	0.014561	0.027135	0.945949	627	2	Hnrnpl	0.014248	0.027686	0.986778	627	1
Skor1	6	0.010537	0.025889	0.93117	628	3	Lcn6	0.014569	0.02715	0.945949	628	2	NonTargetingControlGuideForMouse_0322	0.014273	0.027734	0.986778	628	1
Sprtn	6	0.010542	0.025899	0.93117	629	3	Gm13177	0.014578	0.02717	0.945949	629	1	Ube2v2	0.014295	0.02777	0.986778	629	1
9230110F15Rik	6	0.010566	0.02596	0.93117	630	1	Flywch2	0.014617	0.027225	0.945949	630	2	A330021E22Rik	0.014332	0.027833	0.986778	630	2
Zmym1	6	0.010597	0.026039	0.93117	631	2	Paip2	0.014625	0.027235	0.945949	631	1	Alkbh2	0.014342	0.027849	0.986778	631	2
1700113H08Rik	6	0.010613	0.026077	0.93117	632	1	Dbx1	0.014644	0.027267	0.945949	632	2	Gm5886	0.014436	0.027996	0.986778	632	1
Zfp383	6	0.010622	0.026096	0.93117	633	3	Suco	0.014801	0.02751	0.945949	633	2	Vmn1r193	0.014447	0.028016	0.986778	633	2
Gm136	6	0.01066	0.026179	0.93117	634	1	Krtap9-3	0.014813	0.027525	0.945949	634	1	1700034J05Rik	0.01446	0.028035	0.986778	634	2
Tmem60	6	0.010699	0.026271	0.93117	635	3	Rgag1	0.014822	0.02754	0.945949	635	2	Gaa	0.014481	0.028065	0.986778	635	2
Trappc6b	6	0.010727	0.026334	0.93117	636	2	AK010878	0.01486	0.027597	0.945949	636	1	Krtap4-16	0.014483	0.02807	0.986778	636	1
Zfp609	6	0.010736	0.026354	0.93117	637	3	Slc14a1	0.014897	0.027662	0.945949	637	2	Asrgl1	0.014562	0.02819	0.986778	637	2
Nfya	6	0.010755	0.026398	0.93117	638	1	Ano4	0.014907	0.027679	0.945949	638	1	Olfr1288	0.014576	0.028213	0.986778	638	2
Dmxl2	6	0.010763	0.026422	0.93117	639	3	Stac2	0.015028	0.027877	0.945949	639	2	Nle1	0.014578	0.028218	0.986778	639	2
Plau	6	0.010822	0.026552	0.93117	640	2	Ctsc	0.015035	0.027886	0.945949	640	2	Mup4	0.01462	0.028276	0.986778	640	1
Zfp932	6	0.010849	0.026612	0.93117	641	1	Fkbp1b	0.015049	0.027909	0.945949	641	1	Hspb9	0.014625	0.02828	0.986778	641	2
Papd4	6	0.010851	0.02662	0.93117	642	2	AW549877	0.015056	0.027919	0.945949	642	2	Cd40lg	0.014672	0.028348	0.986778	642	1
Ncapg2	6	0.010864	0.026645	0.93117	643	3	Kctd10	0.015096	0.02798	0.945949	643	1	Olfr1156	0.014719	0.028424	0.986778	643	2
Pmpcb	6	0.010897	0.026711	0.93117	644	1	Prnp	0.015143	0.028054	0.945949	644	1	Tmem175	0.014764	0.028491	0.986778	644	2
Jrkl	6	0.010944	0.026816	0.93117	645	1	Vimp	0.015159	0.028081	0.945949	645	2	Ddx47	0.014764	0.028491	0.986778	645	2
Rnf38	6	0.010949	0.026828	0.93117	646	3	Upf2	0.015159	0.028081	0.945949	646	2	Eqtn	0.014764	0.028491	0.986778	646	2
Agrn	6	0.010949	0.026828	0.93117	647	3	Trpc4	0.015159	0.028081	0.945949	647	2	Trim65	0.014764	0.028491	0.986778	647	2
Cml5	6	0.010977	0.026892	0.93117	648	2	Tmprss4	0.015159	0.028081	0.945949	648	2	Edn1	0.014766	0.028493	0.986778	648	1
Npdc1	6	0.010986	0.026912	0.93117	649	2	Casc5	0.015237	0.028205	0.945949	649	1	NonTargetingControlGuideForMouse_0286	0.014854	0.028637	0.986778	649	1
Tmem88	6	0.010991	0.026926	0.93117	650	1	Npdc1	0.015249	0.028226	0.945949	650	2	Rhbdd2	0.01486	0.028643	0.986778	650	2
Ptpn13	6	0.011001	0.026941	0.93117	651	2	Hspd1	0.015284	0.02829	0.945949	651	1	mmu-mir-93	0.014877	0.028671	0.986778	651	1
Krt10	6	0.011009	0.026961	0.93117	652	3	Vmn2r89	0.015284	0.02829	0.945949	652	2	Rfc5	0.014907	0.028716	0.986778	652	1
Spint3	6	0.01103	0.02701	0.93117	653	2	Nipbl	0.015331	0.02837	0.945949	653	1	Ccdc58	0.01498	0.028822	0.986778	653	2
Rps20	6	0.011039	0.027029	0.93117	654	1	Ccl9	0.015333	0.028372	0.945949	654	2	D630033O11Rik	0.015002	0.028854	0.986778	654	1
Ambra1	6	0.01108	0.027118	0.93117	655	3	Miip	0.015368	0.028428	0.945949	655	2	Eps15	0.015049	0.028932	0.986778	655	1
Lpcat4	6	0.011086	0.027132	0.93117	656	1	Adam25	0.015378	0.028444	0.945949	656	1	Il13ra1	0.015096	0.02901	0.986778	656	2
Olfr45	6	0.011133	0.027241	0.93117	657	2	Vmn1r27	0.015382	0.02845	0.945949	657	2	Snrpf	0.015121	0.029047	0.986778	657	2
Trim43a	6	0.011157	0.027297	0.93117	658	2	Hsbp1l1	0.015403	0.02849	0.945949	658	2	Sema3b	0.015121	0.029047	0.986778	658	2
Gm13083	6	0.011159	0.0273	0.93117	659	3	R3hcc1	0.015425	0.02853	0.945949	659	1	Olfr1497	0.015143	0.029079	0.986778	659	1
Gatad1	6	0.01118	0.027351	0.93117	660	1	Gm13125	0.015465	0.028598	0.945949	660	2	Actr1a	0.01519	0.029142	0.986778	660	1
Topaz1	6	0.011208	0.027411	0.93117	661	3	Amfr	0.015473	0.028611	0.945949	661	1	Dnajc21	0.015237	0.029218	0.986778	661	1
Ing5	6	0.011228	0.027456	0.93117	662	1	Nog	0.01552	0.028683	0.945949	662	2	2017-09-06	0.015284	0.029305	0.986778	662	1
Wnt4	6	0.011267	0.027541	0.93117	663	3	Stxbp3a	0.015521	0.028685	0.945949	663	2	Ndufs4	0.015331	0.02938	0.986778	663	1
Rhbdd1	6	0.011275	0.027557	0.93117	664	1	mmu-mir-8110	0.015522	0.028686	0.945949	664	1	Atg4d	0.01535	0.029409	0.986778	664	2
Mfap1a	3	0.011321	0.027659	0.93117	665	1	mmu-mir-711	0.015522	0.028686	0.945949	665	1	Dhps	0.01535	0.029409	0.986778	665	2
Gng8	6	0.011322	0.027662	0.93117	666	2	Lysmd4	0.015567	0.028772	0.945949	666	1	Rps15	0.01535	0.029409	0.986778	666	2
Gramd1a	6	0.011344	0.027718	0.93117	667	2	Mylk4	0.015598	0.028832	0.945949	667	2	Vps4b	0.01535	0.029409	0.986778	667	2
Rbm5	6	0.011358	0.027753	0.93117	668	3	BC068157	0.015614	0.02886	0.945949	668	1	Mrps9	0.01535	0.029409	0.986778	668	2
Sh3bgrl2	6	0.011361	0.027761	0.93117	669	3	Olfr470	0.015658	0.028928	0.945949	669	2	Ccar1	0.015425	0.029523	0.986778	669	1
Spef2	6	0.011369	0.027778	0.93117	670	3	Fga	0.015661	0.028934	0.945949	670	1	Lrrc40	0.015473	0.029595	0.986778	670	1
Cyb561a3	6	0.011372	0.027788	0.93117	671	3	NonTargetingControlGuideForMouse_0181	0.015704	0.029001	0.945949	671	1	Gm13271	0.015514	0.029657	0.986778	671	2
Rbfox2	6	0.011381	0.027806	0.93117	672	3	Olfr970	0.015708	0.029005	0.945949	672	1	Hoxb1	0.015567	0.029749	0.986778	672	1
Casc5	6	0.011399	0.027845	0.93117	673	2	1700034J05Rik	0.015711	0.029011	0.945949	673	2	Rnf38	0.01557	0.029754	0.986778	673	2
Tra2b	6	0.011417	0.027895	0.93117	674	1	Napg	0.015718	0.029022	0.945949	674	2	Wdr38	0.015605	0.029813	0.986778	674	2
Meis3	6	0.011418	0.027898	0.93117	675	3	Nfib	0.015725	0.029035	0.945949	675	2	Rps20	0.015614	0.029827	0.986778	675	1
Olfr723	6	0.011435	0.027931	0.93117	676	2	Zfp595	0.015732	0.029047	0.945949	676	2	Lysmd4	0.015704	0.029965	0.986778	676	2
Olfr61	6	0.011446	0.027957	0.93117	677	3	Gmfg	0.015739	0.029058	0.945949	677	2	Amfr	0.015708	0.029971	0.986778	677	2
BC026590	6	0.011499	0.028081	0.93117	678	2	Agrn	0.015753	0.029088	0.945949	678	2	Bcl9l	0.015755	0.030045	0.986778	678	1
Tm7sf2	6	0.011511	0.028105	0.93117	679	1	Olfr223	0.015755	0.029092	0.945949	679	1	Olfr45	0.015781	0.030088	0.986778	679	2
Cenpb	6	0.011525	0.028136	0.93117	680	3	4930451I11Rik	0.015802	0.029166	0.945949	680	1	Grm7	0.015802	0.030119	0.986778	680	1
Strn3	6	0.011558	0.028211	0.93117	681	1	Plcg2	0.015817	0.029184	0.945949	681	2	Agrn	0.015838	0.03017	0.986778	681	2
Spag8	6	0.011605	0.028322	0.93117	682	2	Rbm5	0.015852	0.029243	0.945949	682	2	Fcer1a	0.015849	0.030191	0.986778	682	1
Usp4	6	0.011637	0.028397	0.93117	683	2	Ptgdr	0.015873	0.029277	0.945949	683	1	3830417A13Rik	0.015894	0.030269	0.986778	683	2
Fgf12	6	0.011641	0.028406	0.93117	684	3	Plxna3	0.015923	0.029361	0.945949	684	2	Stk17b	0.015896	0.030272	0.986778	684	2
Abcb4	6	0.011647	0.028418	0.93117	685	3	Comtd1	0.01593	0.029371	0.945949	685	2	Fzr1	0.015943	0.030346	0.986778	685	2
Wsb1	6	0.011653	0.02843	0.93117	686	1	Clps	0.015943	0.029391	0.945949	686	1	Net1	0.015972	0.03039	0.986778	686	2
Spata22	6	0.011693	0.028514	0.93117	687	3	Zdhhc19	0.01599	0.029467	0.945949	687	1	Svs6	0.015979	0.030402	0.986778	687	2
Hoxd12	6	0.0117	0.02853	0.93117	688	1	Gm20806	0.016002	0.029487	0.945949	688	1	Crebzf	0.015993	0.030427	0.986778	688	2
Idh1	6	0.011711	0.028554	0.93117	689	2	Tmem145	0.016084	0.029622	0.945949	689	1	Adipoq	0.016037	0.030507	0.986778	689	2
Sypl	6	0.011717	0.028569	0.93117	690	2	Naa30	0.016086	0.029624	0.945949	690	2	Zmym5	0.016043	0.030516	0.986778	690	2
Kcnj16	6	0.011725	0.028594	0.93117	691	3	Olfr3	0.016114	0.029663	0.945949	691	2	Wdr34	0.016057	0.030538	0.986778	691	2
mmu-mir-7081	4	0.011729	0.028608	0.93117	692	1	Olfr915	0.016131	0.029695	0.945949	692	1	Gm136	0.016084	0.030572	0.986778	692	1
Gdf7	6	0.011741	0.028636	0.93117	693	3	Cntln	0.016179	0.029764	0.945949	693	2	Olfr1221	0.016093	0.03059	0.986778	693	2
Slc23a3	6	0.011747	0.028649	0.93117	694	1	Egr2	0.0162	0.0298	0.945949	694	2	mmu-mir-7225	0.016141	0.030657	0.986778	694	2
Rims4	6	0.011748	0.02865	0.93117	695	2	Pcdh15	0.016226	0.029846	0.945949	695	1	Fam71e1	0.016178	0.030717	0.986778	695	2
Tm4sf1	6	0.011748	0.028653	0.93117	696	3	Paip1	0.016273	0.029934	0.945949	696	1	Abcg2	0.016179	0.030717	0.986778	696	1
Nkg7	6	0.011783	0.028731	0.931337	697	3	Timd4	0.016367	0.030102	0.945949	697	1	Ly6g6e	0.016207	0.030757	0.986778	697	2
Tvp23a	6	0.011794	0.028761	0.931337	698	1	Mavs	0.016371	0.03011	0.945949	698	2	Slc22a8	0.016257	0.030845	0.986778	698	2
Vmn1r73	6	0.011809	0.028798	0.931337	699	3	NonTargetingControlGuideForMouse_0610	0.016396	0.030151	0.945949	699	1	mmu-mir-374b	0.016293	0.030913	0.986778	699	2
Gm5416	6	0.011822	0.028822	0.931337	700	2	Epn3	0.016414	0.030179	0.945949	700	1	Olfr1223	0.016321	0.030966	0.986778	700	2
Olfr262	6	0.011842	0.028873	0.931646	701	1	Taf1	0.016461	0.030244	0.945949	701	1	Sorcs3	0.016418	0.031124	0.986778	701	2
Spta1	6	0.011882	0.028964	0.933239	702	3	Colgalt2	0.016508	0.03033	0.945949	702	1	Usmg5	0.016418	0.031124	0.986778	702	2
Serpinb6d	6	0.011915	0.029039	0.934334	703	2	Siah2	0.016609	0.030501	0.945949	703	2	Olfr918	0.016465	0.031195	0.986778	703	2
Gm428	1	0.011952	0.029122	0.935679	704	1	Vmn1r70	0.016609	0.030501	0.945949	704	2	Lhx4	0.016479	0.03122	0.986778	704	2
Olfr1490	6	0.011987	0.029203	0.936936	705	3	Olfr606	0.016609	0.030501	0.945949	705	2	Rem2	0.016551	0.031337	0.986778	705	2
Samd7	6	0.012031	0.029296	0.938596	706	2	Mfsd12	0.016609	0.030501	0.945949	706	2	Clk4	0.016594	0.031411	0.986778	706	2
Camkk1	6	0.012086	0.029421	0.938735	707	2	Mmp11	0.01672	0.030683	0.945949	707	1	Map2k4	0.016616	0.031445	0.986778	707	2
Wisp3	6	0.012093	0.029438	0.938735	708	3	Olfr1129	0.01672	0.030683	0.945949	708	1	Mdm2	0.016659	0.031516	0.986778	708	2
Ccl6	6	0.012102	0.029462	0.938735	709	3	Xaf1	0.01672	0.030683	0.945949	709	2	Padi6	0.016681	0.031548	0.986778	709	2
Fam71e1	6	0.012105	0.029467	0.938735	710	3	Cpxm1	0.01672	0.030683	0.945949	710	1	Slc22a14	0.016767	0.031673	0.986778	710	2
Urad	6	0.012125	0.029508	0.938735	711	1	Olfr167	0.01672	0.030683	0.945949	711	1	4632428N05Rik	0.016767	0.031673	0.986778	711	1
Lin7c	6	0.012172	0.029624	0.941088	712	1	Ly6k	0.01672	0.030683	0.945949	712	1	Obox3	0.016767	0.031673	0.986778	712	1
2700062C07Rik	6	0.012219	0.029725	0.942887	713	2	Cpa5	0.01672	0.030683	0.945949	713	1	Nsg2	0.016767	0.031673	0.986778	713	2
Glp1r	6	0.01228	0.029863	0.942887	714	3	Adcy8	0.01672	0.030683	0.945949	714	1	Ifna14	0.016767	0.031673	0.986778	714	1
Tfeb	6	0.012298	0.029905	0.942887	715	3	mmu-mir-375	0.016755	0.030744	0.945949	715	2	Pccb	0.016767	0.031673	0.986778	715	1
Epha6	6	0.012309	0.02993	0.942887	716	2	Olfr605	0.016811	0.030834	0.945949	716	2	Impact	0.016767	0.031673	0.986778	716	1
Timd4	6	0.012314	0.029934	0.942887	717	1	NonTargetingControlGuideForMouse_0543	0.016865	0.030931	0.945949	717	1	Prdx6b	0.016767	0.031673	0.986778	717	1
Havcr2	6	0.012315	0.029938	0.942887	718	2	mmu-mir-5619	0.016879	0.030957	0.945949	718	2	Ndufs3	0.016767	0.031673	0.986778	718	2
Lhx4	6	0.012328	0.029972	0.942887	719	2	Ptprr	0.016931	0.031051	0.945949	719	1	H3f3a	0.016767	0.031673	0.986778	719	1
Clca6	6	0.012397	0.030115	0.943414	720	2	Slc15a3	0.016935	0.031056	0.945949	720	2	Sars2	0.016767	0.031673	0.986778	720	1
Tmem220	6	0.012408	0.030143	0.943414	721	1	Efcab7	0.016949	0.031081	0.945949	721	2	Sf3b3	0.016767	0.031673	0.986778	721	1
Slc30a4	6	0.012426	0.030188	0.943414	722	3	Shd	0.016978	0.031122	0.945949	722	1	Pole3	0.016767	0.031673	0.986778	722	1
mmu-mir-6963	4	0.012454	0.030254	0.943414	723	1	Rab39b	0.01703	0.031209	0.945949	723	2	Olfr786	0.016767	0.031673	0.986778	723	1
Sdk1	6	0.012455	0.030258	0.943414	724	1	Aga	0.017044	0.03123	0.945949	724	2	Nars2	0.016767	0.031673	0.986778	724	1
Rab39b	6	0.012471	0.030297	0.943414	725	3	Afap1l1	0.017052	0.03124	0.945949	725	2	Tmem145	0.016767	0.031673	0.986778	725	2
Ergic1	6	0.012486	0.030329	0.943414	726	3	Rem2	0.017066	0.031271	0.945949	726	2	Rps12	0.016767	0.031673	0.986778	726	1
Osbpl8	6	0.012503	0.030364	0.943414	727	1	Skor1	0.017073	0.031279	0.945949	727	2	Pitx1	0.016804	0.031723	0.986959	727	2
Acsbg2	6	0.012507	0.030379	0.943414	728	3	Vmn1r233	0.017103	0.031321	0.945949	728	2	Car6	0.016862	0.031825	0.986959	728	2
Vmn1r43	6	0.012541	0.03046	0.943414	729	3	Myot	0.017119	0.031351	0.945949	729	1	Gabra1	0.016877	0.03185	0.986959	729	2
Olig2	6	0.012559	0.030501	0.943414	730	3	Lacc1	0.017213	0.031508	0.945949	730	1	Rnf186	0.016891	0.031877	0.986959	730	2
Sel1l2	6	0.012573	0.030531	0.943414	731	1	Olfr1238	0.01722	0.03152	0.945949	731	2	Gdf10	0.016949	0.031979	0.986959	731	2
Trib3	6	0.012573	0.030531	0.943414	732	1	Ncdn	0.017257	0.03158	0.945949	732	2	mmu-mir-470	0.016977	0.032021	0.986959	732	2
Gm11437	6	0.012607	0.030597	0.944167	733	3	Ecel1	0.01726	0.031585	0.945949	733	1	Rsrc2	0.016979	0.032021	0.986959	733	2
Vegfa	6	0.012644	0.030675	0.945268	734	2	Tsr3	0.017293	0.031635	0.945949	734	2	Mthfs	0.017014	0.03208	0.986959	734	1
Kcnip4	6	0.012691	0.030792	0.947153	735	1	Osbpl8	0.017307	0.031656	0.945949	735	1	Thrap3	0.017059	0.032149	0.986959	735	2
Krtap3-1	6	0.012734	0.030886	0.947153	736	2	mmu-mir-466b-1	0.017342	0.031713	0.945949	736	1	mmu-mir-7683	0.017147	0.032288	0.986959	736	2
Lce6a	6	0.012739	0.030892	0.947153	737	1	C78339	0.017354	0.031733	0.945949	737	1	mmu-mir-3473d	0.017233	0.032437	0.986959	737	1
Pycrl	6	0.012786	0.030955	0.947153	738	1	Lpin2	0.017401	0.031802	0.945949	738	2	mmu-mir-6918	0.017233	0.032437	0.986959	738	1
mmu-mir-7057	4	0.0128	0.03098	0.947153	739	2	Trim9	0.017404	0.031806	0.945949	739	2	NonTargetingControlGuideForMouse_0464	0.017255	0.032467	0.986959	739	1
Cyb5rl	6	0.012805	0.030988	0.947153	740	2	Slc5a7	0.017411	0.031821	0.945949	740	2	Bmper	0.017293	0.032535	0.986959	740	2
Olfr8	6	0.012833	0.031031	0.947153	741	1	Camkk1	0.017448	0.03189	0.945949	741	2	Igbp1b	0.017319	0.032579	0.986959	741	2
Crebl2	6	0.01288	0.031098	0.947153	742	1	Gm15800	0.017448	0.031891	0.945949	742	1	Nsun6	0.01733	0.032597	0.986959	742	2
Actrt1	6	0.012888	0.031116	0.947153	743	2	Cbx4	0.017542	0.032032	0.945949	743	1	Mroh4	0.017359	0.03264	0.986959	743	2
Nfyc	6	0.012927	0.031175	0.947153	744	1	Olfr510	0.017581	0.032095	0.945949	744	2	Nr6a1	0.01744	0.032776	0.986959	744	2
Bola3	6	0.012943	0.031196	0.947153	745	2	Tmem56	0.017589	0.032107	0.945949	745	1	mmu-mir-190b	0.017451	0.032793	0.986959	745	2
Pcdh15	6	0.013022	0.031315	0.949493	746	1	Gm12888	0.017596	0.032118	0.945949	746	2	Mstn	0.017463	0.032812	0.986959	746	2
Mrpl32	6	0.013116	0.031455	0.950029	747	1	Skint9	0.017683	0.032265	0.945949	747	1	Olfr382	0.017485	0.032856	0.986959	747	2
Atp8a1	6	0.013163	0.031529	0.950029	748	1	Cog3	0.017685	0.032267	0.945949	748	2	Olfr60	0.017492	0.032866	0.986959	748	2
Zfp704	6	0.013176	0.031549	0.950029	749	2	Vmn1r183	0.017707	0.032307	0.945949	749	2	Ddah2	0.0175	0.03288	0.986959	749	2
Mrgprx1	6	0.013176	0.031549	0.950029	750	2	Serpinb10	0.01773	0.032346	0.945949	750	2	Hnrnph3	0.017518	0.03291	0.986959	750	2
Trpv1	6	0.013176	0.031549	0.950029	751	2	Olfr911-ps1	0.017766	0.032404	0.945949	751	2	Snrnp40	0.017519	0.032913	0.986959	751	1
4930524B15Rik	6	0.01321	0.031608	0.950029	752	2	Plac1	0.017824	0.032497	0.945949	752	1	Zfp637	0.017519	0.032913	0.986959	752	1
NonTargetingControlGuideForMouse_0691	1	0.013232	0.031629	0.950029	753	1	Rslcan18	0.017918	0.032639	0.945949	753	1	Fasl	0.017519	0.032913	0.986959	753	1
Tulp3	6	0.013258	0.031669	0.950029	754	2	Eps15	0.017965	0.03272	0.945949	754	1	Olfr44	0.017625	0.033079	0.986959	754	2
Ctsr	6	0.013305	0.031736	0.950188	755	1	Pced1b	0.018012	0.032795	0.945949	755	1	Mro	0.017625	0.033079	0.986959	755	2
Tnfsf15	6	0.013352	0.031813	0.950188	756	2	Car2	0.018013	0.032795	0.945949	756	2	NonTargetingControlGuideForMouse_0599	0.017676	0.033163	0.986959	756	1
Acot3	6	0.013362	0.031823	0.950188	757	2	Krt9	0.018035	0.03283	0.945949	757	2	C78339	0.017683	0.033176	0.986959	757	2
Sdf4	6	0.013375	0.031843	0.950188	758	2	Hapln1	0.018042	0.032841	0.945949	758	2	Endov	0.01773	0.033261	0.986959	758	2
Leprotl1	6	0.013399	0.031884	0.950188	759	2	Homer3	0.018057	0.032866	0.945949	759	2	Meis2	0.017777	0.03333	0.986959	759	1
Ifitm10	6	0.013434	0.03194	0.950476	760	2	Abcb4	0.01811	0.032952	0.945949	760	2	Copz2	0.017781	0.033338	0.986959	760	2
Trit1	6	0.013466	0.031998	0.950476	761	2	Morf4l1	0.018153	0.033005	0.945949	761	2	mmu-mir-7233	0.017788	0.033347	0.986959	761	2
Ndufs1	6	0.013493	0.032038	0.950476	762	1	Kcnt2	0.018247	0.033145	0.945949	762	1	Gm829	0.017824	0.033409	0.986959	762	1
mmu-mir-467a-1	1	0.01351	0.032062	0.950476	763	1	Olfr214	0.018294	0.033215	0.945949	763	1	Arhgap27	0.017826	0.033411	0.986959	763	2
Usp46	6	0.013588	0.032176	0.951459	764	1	Cabs1	0.018309	0.033232	0.945949	764	2	Krtap10-10	0.017856	0.033458	0.986959	764	2
Fam71b	6	0.013591	0.032179	0.951459	765	2	Tmem204	0.018341	0.033284	0.945949	765	1	Prmt3	0.017871	0.033481	0.986959	765	1
1700010D01Rik	5	0.013658	0.032269	0.952867	766	2	Sh3pxd2b	0.018343	0.033288	0.945949	766	2	Cd300lb	0.017918	0.033553	0.986959	766	1
A930009A15Rik	6	0.013729	0.032376	0.954787	767	1	Cstf2t	0.018366	0.033325	0.945949	767	2	Clps	0.017965	0.033628	0.986959	767	1
Psma5	6	0.013776	0.032452	0.955761	768	1	Lmf2	0.018388	0.033357	0.945949	768	1	Ppp2r2a	0.017986	0.033663	0.986959	768	2
Fkbp14	6	0.013823	0.032521	0.956553	769	1	Lama3	0.018388	0.033358	0.945949	769	2	Zbtb12	0.017986	0.033663	0.986959	769	2
Olfr1034	6	0.013871	0.032579	0.956734	770	1	Fyb	0.018388	0.033358	0.945949	770	2	Rad54b	0.018012	0.033706	0.986959	770	1
Dnajc21	6	0.013909	0.03264	0.956734	771	2	Pmp2	0.018435	0.033436	0.945949	771	1	Fgf18	0.018059	0.033779	0.986959	771	1
Tex22	6	0.013918	0.032654	0.956734	772	2	Lect2	0.018441	0.033439	0.945949	772	2	Herc3	0.018095	0.033829	0.986959	772	2
Ebf2	6	0.013963	0.032729	0.956897	773	2	AI593442	0.018456	0.03347	0.945949	773	2	Arl6	0.018125	0.033876	0.986959	773	2
Lgals8	6	0.013976	0.032744	0.956897	774	2	Ap1m2	0.018464	0.033481	0.945949	774	2	Tax1bp1	0.018153	0.033914	0.986959	774	1
Dbx1	6	0.014056	0.032875	0.95732	775	2	Fbrs	0.018472	0.033495	0.945949	775	2	Ccdc153	0.018162	0.03393	0.986959	775	2
Chit1	6	0.014059	0.032879	0.95732	776	1	Zfyve21	0.018494	0.033532	0.945949	776	2	Rock1	0.018185	0.033959	0.986959	776	2
Hist1h2bl	2	0.014092	0.032935	0.95732	777	1	Gpr126	0.018576	0.033671	0.945949	777	1	Trmt2b	0.0182	0.033986	0.986959	777	2
Olfr111	6	0.014106	0.032956	0.95732	778	1	Car9	0.018616	0.033734	0.945949	778	2	Olfr543	0.0182	0.033986	0.986959	778	1
Coro1b	6	0.014184	0.033065	0.95732	779	2	Gm21951	0.018634	0.033761	0.945949	779	1	Adh6a	0.018247	0.034063	0.986959	779	1
Wdfy1	6	0.014201	0.033087	0.95732	780	1	Vtcn1	0.018646	0.033778	0.945949	780	2	Ftsj3	0.018294	0.034141	0.986959	780	1
Pdlim2	6	0.014244	0.033152	0.95732	781	2	Galnt9	0.018661	0.033805	0.945949	781	2	mmu-mir-375	0.0183	0.034156	0.986959	781	1
Cnbp	6	0.014248	0.033158	0.95732	782	1	Dennd2a	0.01867	0.033818	0.945949	782	1	Amelx	0.018305	0.034164	0.986959	782	2
Ube2z	6	0.014271	0.033202	0.95732	783	2	NonTargetingControlGuideForMouse_0599	0.018678	0.03383	0.945949	783	1	LOC666331	0.018341	0.03422	0.986959	783	1
Ntn4	6	0.014295	0.033245	0.95732	784	1	A430107P09Rik	0.018684	0.033841	0.945949	784	2	1810033B17Rik	0.018388	0.034295	0.986959	784	2
Lztr1	6	0.014345	0.033323	0.95732	785	2	Telo2	0.018707	0.033881	0.945949	785	2	Rnf157	0.018411	0.03433	0.986959	785	2
Klhl23	6	0.014396	0.033402	0.95732	786	2	Olfr918	0.018717	0.033898	0.945949	786	1	Gm5615	0.018435	0.034366	0.986959	786	1
Srsf4	6	0.01442	0.033437	0.95732	787	2	Catsperg2	0.018722	0.033908	0.945949	787	2	Clec5a	0.018482	0.034446	0.986959	787	1
Homer3	6	0.014427	0.033448	0.95732	788	2	Zfp787	0.01873	0.03392	0.945949	788	2	Rxrg	0.018502	0.034476	0.986959	788	2
Tuba8	6	0.014436	0.033463	0.95732	789	1	BC147527	0.018764	0.033975	0.945949	789	1	Kcnip4	0.018529	0.034517	0.986959	789	1
Abhd13	6	0.014467	0.033509	0.95732	790	2	Kncn	0.018791	0.03401	0.945949	790	2	Oas1f	0.018532	0.034521	0.986959	790	2
Ift43	6	0.014483	0.033532	0.95732	791	1	Aqp11	0.018811	0.034046	0.945949	791	1	Mall	0.01857	0.034592	0.986959	791	2
Olfr815	6	0.014522	0.033588	0.95732	792	2	Ldlrap1	0.018858	0.034121	0.945949	792	1	9330182L06Rik	0.01857	0.034592	0.986959	792	2
Olfr1428	6	0.014542	0.03362	0.95732	793	2	Stt3a	0.018904	0.034188	0.945949	793	1	Tnfsf15	0.018576	0.034602	0.986959	793	1
NonTargetingControlGuideForMouse_0610	1	0.014568	0.03366	0.95732	794	1	Ube2ql1	0.018951	0.034256	0.945949	794	2	Slc5a1	0.01867	0.034747	0.987813	794	1
Umod	6	0.014578	0.033682	0.95732	795	1	Muc13	0.018982	0.034294	0.945949	795	2	Apobec3	0.018717	0.034827	0.987813	795	1
Matn1	6	0.014625	0.033743	0.95732	796	1	Rorc	0.018998	0.034313	0.945949	796	1	Reps2	0.018737	0.03486	0.987813	796	2
Dgcr2	6	0.014672	0.033805	0.95732	797	1	Gm15140	0.019003	0.034319	0.945949	797	1	Ly6c1	0.018806	0.034966	0.987813	797	2
Cpt1c	6	0.014685	0.033828	0.95732	798	2	Nle1	0.019045	0.034387	0.945949	798	1	Fam133b	0.018811	0.034975	0.987813	798	2
Gnai1	6	0.014719	0.033875	0.95732	799	1	Topaz1	0.019085	0.034451	0.945949	799	2	Mertk	0.018858	0.035055	0.987813	799	1
Ceacam9	6	0.014719	0.033875	0.95732	800	2	Tuba1a	0.019085	0.034451	0.945949	800	2	Rfx5	0.018859	0.035057	0.987813	800	2
Gpx6	6	0.014766	0.033944	0.95732	801	1	Ppp2r2a	0.019085	0.034451	0.945949	801	2	Tacc3	0.018882	0.035091	0.987813	801	2
Gabra6	6	0.014808	0.034019	0.95732	802	2	Ms4a4c	0.019085	0.034451	0.945949	802	2	Rslcan18	0.018998	0.035265	0.987813	802	1
Nat1	6	0.014813	0.034027	0.95732	803	1	Rab33b	0.019092	0.034466	0.945949	803	1	Cxcr5	0.019024	0.035306	0.987813	803	2
Olfr91	6	0.01486	0.034101	0.95732	804	1	Rasal2	0.019181	0.034606	0.945949	804	2	Clec4b1	0.019024	0.035306	0.987813	804	2
Slc14a1	6	0.014883	0.034138	0.95732	805	2	Deaf1	0.019233	0.034704	0.945949	805	1	Fgf8	0.019024	0.035306	0.987813	805	2
Stmn2	6	0.014907	0.03417	0.95732	806	2	Matn2	0.019364	0.034912	0.945949	806	1	Tinf2	0.019024	0.035306	0.987813	806	2
Alox12	6	0.014954	0.034236	0.95732	807	1	Frmd5	0.019374	0.034931	0.945949	807	1	Cpn2	0.019045	0.035339	0.987813	807	1
Trappc2	6	0.015002	0.034305	0.95732	808	1	Aspdh	0.019421	0.035004	0.945949	808	1	Ehhadh	0.019233	0.035657	0.987813	808	2
Pfkm	6	0.015042	0.034376	0.95732	809	2	Mrps23	0.019486	0.035093	0.945949	809	2	Lix1	0.019332	0.035805	0.987813	809	2
Nme7	6	0.015049	0.034385	0.95732	810	2	Trim65	0.019486	0.035093	0.945949	810	2	Olfr444	0.019332	0.035805	0.987813	810	2
Dmtn	6	0.015049	0.034385	0.95732	811	2	Hc	0.019486	0.035093	0.945949	811	2	Gm7609	0.019374	0.035878	0.987813	811	1
Pdgfc	6	0.015096	0.034456	0.95732	812	1	Nlrp4f	0.019486	0.035093	0.945949	812	2	Dppa2	0.019421	0.03595	0.987813	812	1
Meis2	6	0.015143	0.034523	0.95732	813	1	Pcdhb9	0.019486	0.035093	0.945949	813	2	Ankrd34a	0.019428	0.035957	0.987813	813	2
Kcnc3	6	0.015145	0.034525	0.95732	814	2	Tmem175	0.019486	0.035093	0.945949	814	2	Slu7	0.019467	0.036022	0.987813	814	2
Onecut1	6	0.015173	0.034565	0.95732	815	2	Olfr1250	0.019486	0.035093	0.945949	815	2	Apol7e	0.019501	0.036069	0.987813	815	1
mmu-mir-7649	2	0.015181	0.034573	0.95732	816	1	D19Ertd737e	0.019486	0.035093	0.945949	816	2	Slfn9	0.019515	0.03609	0.987813	816	1
4930451I11Rik	6	0.01519	0.034588	0.95732	817	1	Pfkfb2	0.019491	0.035101	0.945949	817	1	Inhbc	0.019521	0.036103	0.987813	817	2
Rps13	6	0.015237	0.034666	0.95732	818	1	Prmt3	0.019608	0.035275	0.945949	818	1	Clic3	0.019562	0.036161	0.987813	818	1
Rasgrp4	6	0.015284	0.034745	0.95732	819	1	Cldn12	0.019655	0.035363	0.945949	819	1	Epc2	0.019608	0.036235	0.987813	819	1
Pcnp	6	0.015291	0.034754	0.95732	820	2	Clic3	0.019702	0.035436	0.945949	820	1	Fkbp5	0.01963	0.036269	0.987813	820	2
Vamp3	6	0.015305	0.034779	0.95732	821	2	Ablim1	0.019749	0.035511	0.945949	821	1	Dnah8	0.019645	0.036299	0.987813	821	2
Arhgef4	6	0.015331	0.034825	0.95732	822	1	Meis3	0.019762	0.035534	0.945949	822	2	Fam92a	0.019655	0.036322	0.987813	822	1
Slc9a9	6	0.015378	0.034895	0.95732	823	1	Idh3b	0.019793	0.03558	0.945949	823	2	Gstt1	0.019684	0.036365	0.987813	823	2
Smok3a	1	0.01541	0.034947	0.95732	824	1	Praf2	0.019796	0.035585	0.945949	824	1	Nckap1l	0.019731	0.036444	0.987813	824	2
Ggcx	6	0.015473	0.035042	0.95732	825	1	Snap25	0.019817	0.035614	0.945949	825	2	BC055111	0.019762	0.036496	0.987813	825	2
Prrg4	6	0.015521	0.035113	0.95732	826	2	Eltd1	0.019832	0.035645	0.945949	826	2	Slc9a4	0.019796	0.036553	0.987813	826	1
Olfr1537	6	0.015591	0.035232	0.95732	827	2	Sc4mol	0.019843	0.035665	0.945949	827	1	Vangl2	0.019843	0.036632	0.987813	827	1
Nog	6	0.015614	0.035265	0.95732	828	2	Amigo2	0.019856	0.035686	0.945949	828	2	Gm11437	0.019871	0.036678	0.987813	828	2
Ppp1r3b	6	0.015661	0.035336	0.95732	829	1	Kdm4c	0.019871	0.035709	0.945949	829	2	Polr3a	0.019913	0.036748	0.987813	829	1
Skint9	6	0.015708	0.035402	0.95732	830	1	Nfatc2	0.01989	0.03574	0.945949	830	1	Golga3	0.019918	0.036755	0.987813	830	2
Olfr76	6	0.015732	0.035434	0.95732	831	2	Grhl2	0.019926	0.035798	0.945949	831	2	Prss51	0.020005	0.036892	0.987813	831	2
Olfr531	6	0.015753	0.035471	0.95732	832	2	Rel	0.019973	0.035869	0.945949	832	2	Kras	0.020031	0.036932	0.987813	832	1
Paip2	6	0.015755	0.035475	0.95732	833	1	Zkscan17	0.019984	0.035885	0.945949	833	1	Olfr1054	0.020036	0.036939	0.987813	833	2
Ccdc177	6	0.015767	0.035494	0.95732	834	2	Pglyrp1	0.020031	0.035961	0.945949	834	1	Prss52	0.020077	0.037001	0.987813	834	1
Nkd1	6	0.015802	0.035548	0.95732	835	1	Olfr536	0.020124	0.036106	0.945949	835	1	Gm9112	0.020091	0.037022	0.987813	835	2
Hoxc5	6	0.015848	0.035613	0.95732	836	2	mmu-mir-488	0.020149	0.036146	0.945949	836	1	Ccs	0.020099	0.037032	0.987813	836	2
Sntg1	6	0.015849	0.035614	0.95732	837	1	Herc4	0.020171	0.03618	0.945949	837	1	Map6d1	0.020124	0.037074	0.987813	837	1
mmu-mir-7042	4	0.015883	0.03567	0.95732	838	1	Xylt1	0.020173	0.036183	0.945949	838	2	Rel	0.020162	0.037139	0.987813	838	2
Nmnat1	6	0.015944	0.035758	0.95732	839	2	Svs2	0.020218	0.03625	0.945949	839	1	Praf2	0.020171	0.037159	0.987813	839	1
Tusc5	6	0.015958	0.03578	0.95732	840	2	Fgfr1op2	0.020265	0.036326	0.945949	840	1	Slc5a12	0.020185	0.037178	0.987813	840	2
Mlf1	6	0.016001	0.03585	0.95732	841	2	C1s	0.020288	0.036362	0.945949	841	2	Syt16	0.020218	0.037227	0.987813	841	1
Capn11	6	0.016037	0.03591	0.95732	842	1	Dmtn	0.020303	0.036388	0.945949	842	2	Vgll4	0.020265	0.037304	0.987813	842	1
Bcas1	6	0.01605	0.035931	0.95732	843	2	Adam39	0.020312	0.036403	0.945949	843	1	Sh3pxd2b	0.020312	0.037384	0.987813	843	1
Acy3	6	0.016084	0.03597	0.95732	844	2	Olfr288	0.020335	0.036437	0.945949	844	2	Apool	0.020335	0.037415	0.987813	844	2
Gne	6	0.016131	0.036041	0.95732	845	1	Cpt1c	0.020343	0.036448	0.945949	845	2	Stxbp3a	0.020359	0.037451	0.987813	845	2
mmu-mir-1941	4	0.016134	0.036044	0.95732	846	1	Foxj3	0.020359	0.036471	0.945949	846	1	Dmtn	0.020375	0.037476	0.987813	846	2
Meox1	6	0.016143	0.036053	0.95732	847	2	Spata22	0.02041	0.036556	0.945949	847	2	Fgfr1op2	0.020406	0.037529	0.987813	847	1
Nusap1	6	0.016164	0.036084	0.95732	848	2	Defb45	0.020453	0.036627	0.945949	848	1	Soat1	0.020453	0.037609	0.987813	848	1
Wfdc15b	6	0.016179	0.036106	0.95732	849	1	C1rl	0.020462	0.036637	0.945949	849	2	Cdc14a	0.020462	0.037621	0.987813	849	2
Olfr1221	6	0.016186	0.036112	0.95732	850	2	Pigp	0.0205	0.036702	0.945949	850	1	Phf11b	0.020497	0.037676	0.987813	850	2
4930568D16Rik	6	0.016226	0.036175	0.95732	851	1	Hspb9	0.020546	0.036771	0.945949	851	1	Tuba8	0.0205	0.037679	0.987813	851	1
Fbxl2	6	0.016243	0.0362	0.95732	852	2	Ogt	0.020573	0.036813	0.945949	852	2	Gm5416	0.020517	0.037705	0.987813	852	2
Gm5113	6	0.01632	0.03633	0.95732	853	1	Rbfa	0.020593	0.03684	0.945949	853	1	Ctsj	0.020525	0.037715	0.987813	853	2
Carm1	6	0.016336	0.036351	0.95732	854	2	Dhx9	0.020628	0.036897	0.945949	854	2	Ppp1r3b	0.020546	0.037748	0.987813	854	1
Dner	6	0.016343	0.036365	0.95732	855	2	Rab34	0.020636	0.036908	0.945949	855	2	Gabra4	0.020593	0.037819	0.987813	855	1
Aif1	6	0.016371	0.036406	0.95732	856	2	Vmn2r5	0.02064	0.036919	0.945949	856	1	Vmn1r5	0.020612	0.037848	0.987813	856	2
Krtap9-3	6	0.016414	0.036474	0.95732	857	1	Cdkl3	0.020652	0.036933	0.945949	857	2	Ago3	0.02064	0.037897	0.987813	857	1
Cd209a	6	0.016461	0.036534	0.95732	858	1	Mreg	0.020708	0.037017	0.945949	858	2	Spta1	0.020668	0.037937	0.987813	858	2
Stx11	6	0.016472	0.036554	0.95732	859	2	Pcdhb16	0.02074	0.03707	0.945949	859	2	Golt1b	0.020687	0.037965	0.987813	859	2
Ptpn21	6	0.016508	0.036614	0.95732	860	2	Zfp599	0.020781	0.037141	0.945949	860	1	Nkx6-2	0.020708	0.037989	0.987813	860	2
Fam101b	6	0.01653	0.036647	0.95732	861	2	Abhd17a	0.020828	0.037227	0.945949	861	2	Gkn2	0.020734	0.038032	0.987813	861	1
Scfd2	6	0.016537	0.036658	0.95732	862	2	Cdx1	0.020843	0.037251	0.945949	862	2	Pank2	0.020748	0.038054	0.987813	862	2
Hspa1b	6	0.016555	0.036681	0.95732	863	1	Olfr1259	0.020851	0.037261	0.945949	863	2	Tpst2	0.020828	0.038189	0.987813	863	1
Sult2a1	6	0.016602	0.03676	0.95732	864	2	Tmem53	0.020874	0.037295	0.945949	864	1	Zfp266	0.020831	0.038193	0.987813	864	2
Spink5	6	0.016609	0.03677	0.95732	865	2	Insl5	0.020883	0.037309	0.945949	865	2	Dbn1	0.020859	0.038235	0.987813	865	2
Sema3c	6	0.016649	0.036833	0.95732	866	1	Kirrel	0.020921	0.037368	0.945949	866	2	Clvs1	0.020874	0.038255	0.987813	866	1
Smarcad1	6	0.016652	0.036838	0.95732	867	2	Zfp202	0.020939	0.037396	0.945949	867	2	Pgap2	0.020875	0.038256	0.987813	867	2
St8sia6	6	0.016674	0.036869	0.95732	868	2	Nf1	0.020955	0.037419	0.945949	868	2	Prr9	0.020921	0.038338	0.987813	868	1
Psmg1	6	0.016703	0.036914	0.95732	869	2	Sntg1	0.020968	0.037444	0.945949	869	1	Ano4	0.021062	0.038564	0.987813	869	1
Trpc4ap	6	0.016717	0.036935	0.95732	870	2	Mrgprh	0.020975	0.037453	0.945949	870	2	Wfdc17	0.021083	0.038596	0.987813	870	2
Gpr88	6	0.016743	0.03698	0.95732	871	2	Olfr46	0.021003	0.037498	0.945949	871	2	Nedd4l	0.021109	0.03864	0.987813	871	1
Gm15140	1	0.016762	0.037005	0.95732	872	1	Crebl2	0.021015	0.037519	0.945949	872	1	Sos2	0.021176	0.038746	0.987813	872	2
Srrm2	6	0.016819	0.037096	0.95732	873	2	Hspb8	0.021062	0.037596	0.945949	873	1	Aga	0.021203	0.038781	0.987813	873	2
mmu-mir-451a	3	0.016831	0.037117	0.95732	874	2	Wdr44	0.021156	0.037751	0.945949	874	1	Parp9	0.021244	0.038852	0.987813	874	2
AK010878	6	0.016837	0.037129	0.95732	875	1	Vgll4	0.021203	0.037825	0.945949	875	1	Asap3	0.021249	0.038859	0.987813	875	1
Fstl4	6	0.016884	0.037196	0.95732	876	1	NonTargetingControlGuideForMouse_0739	0.021229	0.037869	0.945949	876	1	Galr2	0.021296	0.038938	0.987813	876	1
Olfr1038-ps	6	0.016935	0.037275	0.95732	877	2	S100a7a	0.021249	0.037901	0.945949	877	1	Abhd17a	0.0213	0.038946	0.987813	877	2
Fxyd7	6	0.016964	0.037318	0.95732	878	2	Kif1a	0.021252	0.037904	0.945949	878	2	Olfr837	0.021333	0.038997	0.987813	878	2
Tgoln1	3	0.016979	0.037339	0.95732	879	2	Opn1sw	0.021276	0.037942	0.945949	879	2	Fcrla	0.02139	0.039083	0.987813	879	1
Nxt1	6	0.017	0.037376	0.95732	880	2	Ush1g	0.021296	0.037975	0.945949	880	1	mmu-mir-7037	0.021401	0.039098	0.987813	880	1
Defb21	6	0.017015	0.037399	0.95732	881	2	Gabra1	0.021309	0.037992	0.945949	881	2	Mis18bp1	0.021417	0.039124	0.987813	881	2
Vangl1	6	0.017025	0.037413	0.95732	882	1	Daglb	0.021343	0.038042	0.945949	882	1	Hmgb2	0.021417	0.039124	0.987813	882	2
A630023A22Rik	6	0.017052	0.037447	0.95732	883	2	Dram2	0.02139	0.038116	0.945949	883	1	Esp15	0.021417	0.039124	0.987813	883	2
Fkbp7	6	0.017072	0.037483	0.95732	884	1	Zfp808	0.021437	0.038195	0.945949	884	1	Fgfr1op	0.021417	0.039124	0.987813	884	2
Sun1	6	0.017095	0.037518	0.95732	885	2	Slc35f6	0.021437	0.038195	0.945949	885	1	Hspa2	0.021437	0.039148	0.987813	885	1
Rfx8	6	0.017119	0.037556	0.95732	886	1	Npy	0.02153	0.038345	0.945949	886	1	D11Wsu47e	0.021484	0.039228	0.987813	886	1
Gm20806	2	0.017153	0.037605	0.95732	887	1	Vmn1r45	0.021577	0.038415	0.945949	887	1	Tvp23b	0.021494	0.039247	0.987813	887	2
Ttc18	6	0.017166	0.037628	0.95732	888	1	Sstr4	0.021624	0.038498	0.945949	888	2	Vmn2r122	0.02153	0.03931	0.987813	888	1
Lonrf2	6	0.017213	0.037696	0.95732	889	1	Gm9047	0.021648	0.03854	0.945949	889	2	Irf2bp1	0.021555	0.039349	0.987813	889	2
2310033P09Rik	6	0.017242	0.037745	0.95732	890	2	mmu-mir-27b	0.021651	0.038547	0.945949	890	1	NonTargetingControlGuideForMouse_0280	0.021659	0.039527	0.987813	890	1
Pmp2	6	0.01726	0.03777	0.95732	891	1	Bpifa2	0.021671	0.038578	0.945949	891	2	Olfr1240	0.021671	0.039547	0.987813	891	1
Tcf4	6	0.017271	0.037788	0.95732	892	2	Rnf186	0.021673	0.038582	0.945949	892	2	Rnf139	0.021718	0.039626	0.987813	892	1
Zfp560	6	0.017286	0.037811	0.95732	893	2	Cic	0.021795	0.038774	0.945949	893	2	Ppp1r9a	0.021762	0.039699	0.987813	893	2
Cchcr1	6	0.017315	0.03785	0.95732	894	2	Golim4	0.021803	0.038788	0.945949	894	2	Spata31d1b	0.021765	0.039704	0.987813	894	1
Sptb	6	0.017354	0.037905	0.95732	895	2	Med16	0.021876	0.038898	0.945949	895	2	Nmur2	0.021811	0.039781	0.987813	895	1
Olfr44	6	0.017389	0.037963	0.95732	896	2	Rest	0.021909	0.038952	0.945949	896	2	Hoxd13	0.021858	0.039844	0.987813	896	1
Fam192a	6	0.017401	0.037979	0.95732	897	1	Acot9	0.021925	0.038975	0.945949	897	2	Adam25	0.021905	0.039919	0.987813	897	1
mmu-mir-6992	4	0.017422	0.038012	0.95732	898	1	Nckap1l	0.022007	0.039103	0.945949	898	2	Sntg1	0.021952	0.039996	0.987813	898	1
AY358078	6	0.017448	0.038051	0.95732	899	1	Rhox5	0.022015	0.03912	0.945949	899	2	Copg1	0.021999	0.040051	0.987813	899	2
Drd4	6	0.017495	0.038113	0.95732	900	1	Ddit3	0.022048	0.03917	0.945949	900	2	Cryaa	0.021999	0.040051	0.987813	900	2
Reg3g	6	0.017536	0.038173	0.95732	901	2	Dmxl2	0.022195	0.039389	0.945949	901	2	Wdr82	0.021999	0.040051	0.987813	901	2
Mptx2	5	0.017569	0.038221	0.95732	902	2	Fam71b	0.022203	0.0394	0.945949	902	2	Phf8	0.021999	0.040051	0.987813	902	2
Micu1	6	0.017589	0.038252	0.95732	903	2	Spink4	0.02222	0.039428	0.945949	903	2	Pvrl1	0.021999	0.040051	0.987813	903	2
V1ra8	6	0.017596	0.038263	0.95732	904	2	Cyp2r1	0.022261	0.039492	0.945949	904	2	Ccl11	0.021999	0.040051	0.987813	904	2
Pmfbp1	6	0.017636	0.038328	0.95732	905	1	Olfr787	0.022306	0.039563	0.945949	905	2	Olfr288	0.021999	0.040051	0.987813	905	2
Zrsr2	6	0.017677	0.038391	0.95732	906	2	Vmn1r1	0.022323	0.039584	0.945949	906	2	Tmem204	0.021999	0.040051	0.987813	906	2
Olfr1076	6	0.017683	0.038399	0.95732	907	1	NonTargetingControlGuideForMouse_0188	0.02233	0.039595	0.945949	907	1	Skint9	0.022092	0.040201	0.987813	907	2
Tcf7l2	6	0.01773	0.038481	0.95732	908	2	Exosc3	0.022347	0.039626	0.945949	908	2	Gabrg2	0.022186	0.040339	0.987813	908	1
Chst3	6	0.017796	0.03858	0.95732	909	2	mmu-mir-6988	0.022371	0.039662	0.945949	909	1	Cyb561a3	0.022228	0.040407	0.987813	909	2
Eif4g3	6	0.017804	0.038594	0.95732	910	2	mmu-mir-7661	0.022496	0.039854	0.945949	910	1	Scgb1b3	0.022261	0.04046	0.987813	910	1
Gsk3b	6	0.017818	0.03862	0.95732	911	2	Cdk15	0.022541	0.039925	0.945949	911	2	Tmem54	0.022277	0.040483	0.987813	911	2
Has3	6	0.017871	0.038692	0.95732	912	2	Clvs2	0.022541	0.039925	0.945949	912	2	Ablim1	0.02228	0.040486	0.987813	912	1
Slc27a3	6	0.017918	0.038758	0.95732	913	2	Gm13826	0.022541	0.039925	0.945949	913	2	Prap1	0.022294	0.040503	0.987813	913	2
Cldn8	6	0.01796	0.038816	0.95732	914	2	Dnajc4	0.022541	0.039925	0.945949	914	2	Pcgf1	0.02231	0.04053	0.987813	914	2
Pgm5	6	0.017965	0.038829	0.95732	915	1	Tiam2	0.022541	0.039925	0.945949	915	2	Pnmal2	0.022326	0.040558	0.987813	915	1
Olfr1112	6	0.017968	0.038832	0.95732	916	2	Ticrr	0.022756	0.040259	0.945949	916	2	Sc5d	0.022397	0.040672	0.987813	916	1
Mzt2	6	0.017975	0.038841	0.95732	917	2	Gltpd1	0.022756	0.040259	0.945949	917	2	Olfr847	0.022397	0.040672	0.987813	917	1
Mib1	6	0.018005	0.038885	0.95732	918	2	Ptgs2	0.022756	0.040259	0.945949	918	2	Lcn6	0.022467	0.04078	0.987813	918	2
Gk2	6	0.018013	0.038895	0.95732	919	2	Gsdmc	0.022756	0.040259	0.945949	919	2	Smn1	0.022467	0.04078	0.987813	919	1
Prelid1	6	0.018059	0.038959	0.957444	920	1	Nlrp6	0.022756	0.040259	0.945949	920	2	Myb	0.022483	0.040808	0.987813	920	2
Heatr5b	6	0.018106	0.039027	0.957444	921	2	Tma16	0.022756	0.040259	0.945949	921	2	Oas1c	0.022492	0.040818	0.987813	921	2
Comtd1	6	0.018117	0.03904	0.957444	922	2	Mlkl	0.022931	0.040544	0.945949	922	2	Ebf1	0.0225	0.04083	0.987813	922	2
Tcp1	6	0.01814	0.039073	0.957444	923	2	M6pr	0.022973	0.040618	0.945949	923	2	Olfr166	0.022514	0.040851	0.987813	923	1
Fam178a	6	0.01817	0.039112	0.957444	924	2	Fgfr4	0.023064	0.040752	0.945949	924	2	Pdia5	0.022525	0.040873	0.987813	924	2
Pdcd10	6	0.018247	0.039225	0.957516	925	2	Crip2	0.023073	0.040762	0.945949	925	2	Wdfy1	0.022607	0.040986	0.987813	925	2
Ldlrap1	6	0.018294	0.039293	0.957516	926	1	Gm6289	0.023148	0.04088	0.945949	926	2	Gabrr1	0.022624	0.041015	0.987813	926	2
H2-Q9	3	0.01831	0.039312	0.957516	927	2	NonTargetingControlGuideForMouse_0691	0.023177	0.04092	0.945949	927	1	Ccdc114	0.022654	0.04106	0.987813	927	2
B3galt4	6	0.01832	0.039327	0.957516	928	2	Hcfc1	0.023192	0.040943	0.945949	928	1	Zdhhc19	0.022701	0.04113	0.987813	928	1
Lacc1	6	0.018341	0.039365	0.957516	929	1	Relt	0.023192	0.040943	0.945949	929	1	Sft2d2	0.022744	0.041201	0.987813	929	2
Vmn1r68	6	0.018343	0.039369	0.957516	930	2	Wdr64	0.023192	0.040943	0.945949	930	1	Kif23	0.022744	0.041201	0.987813	930	2
Gprin2	6	0.018458	0.039547	0.959268	931	1	Ghr	0.023192	0.040943	0.945949	931	1	Spink11	0.022745	0.041203	0.987813	931	1
Abca17	6	0.018472	0.039569	0.959268	932	2	Tbc1d2	0.023192	0.040943	0.945949	932	1	Odf3	0.022748	0.041211	0.987813	932	1
Ccdc64	6	0.018502	0.039613	0.959268	933	2	Mill1	0.023192	0.040943	0.945949	933	1	Vmn2r88	0.022794	0.041296	0.987813	933	1
Mapk1ip1l	6	0.018509	0.039624	0.959268	934	2	Golph3	0.023192	0.040943	0.945949	934	1	R3hcc1	0.022841	0.041387	0.987813	934	1
Hsf1	6	0.018532	0.039653	0.959268	935	2	Tet3	0.023192	0.040943	0.945949	935	2	Sval3	0.022888	0.041463	0.987813	935	1
Naa20	6	0.018576	0.03973	0.959313	936	1	Upf3a	0.023192	0.040943	0.945949	936	1	Mmp24	0.022914	0.041497	0.987813	936	2
mmu-mir-547	4	0.018582	0.03974	0.959313	937	1	Top2a	0.023192	0.040943	0.945949	937	1	mmu-mir-6356	0.022933	0.041528	0.987813	937	1
Magi3	6	0.018688	0.039904	0.961656	938	2	Adhfe1	0.023192	0.040943	0.945949	938	1	Hist1h4j	0.022935	0.041531	0.987813	938	1
Slc30a10	6	0.018699	0.039922	0.961656	939	2	Cdkl5	0.023192	0.040943	0.945949	939	2	Mrgpra2a	0.022965	0.041591	0.987813	939	1
D19Ertd737e	6	0.018764	0.040023	0.962083	940	1	Muc19	0.023192	0.040943	0.945949	940	1	Rasgrp4	0.022982	0.041613	0.987813	940	1
Atp7a	6	0.018798	0.040071	0.962083	941	2	Gclc	0.023192	0.040943	0.945949	941	1	Wdr44	0.023028	0.041692	0.987813	941	1
S100a10	6	0.018811	0.040092	0.962083	942	2	Ybx2	0.023192	0.040943	0.945949	942	1	Zfp458	0.023048	0.04172	0.987813	942	2
Fam209	6	0.018858	0.040169	0.962083	943	1	Arf5	0.023192	0.040943	0.945949	943	1	Olfr510	0.023073	0.041754	0.987813	943	2
Olfr223	6	0.018904	0.04023	0.962083	944	2	4930539E08Rik	0.023192	0.040943	0.945949	944	1	Zfp1	0.023075	0.041759	0.987813	944	1
Eif1b	6	0.018905	0.040232	0.962083	945	2	Rfx1	0.023192	0.040943	0.945949	945	1	H2-D1	0.023098	0.041797	0.987813	945	2
Olfr1381	4	0.01899	0.040345	0.962083	946	2	Pdcl	0.023192	0.040943	0.945949	946	2	Spink4	0.023114	0.041823	0.987813	946	2
Hrg	6	0.018998	0.040357	0.962083	947	1	Sdhc	0.023192	0.040943	0.945949	947	1	Zfp322a	0.023122	0.041834	0.987813	947	1
Rab33b	6	0.019045	0.040428	0.962083	948	1	Aqr	0.023192	0.040943	0.945949	948	1	Setd4	0.023123	0.041836	0.987813	948	2
Olfr971	6	0.019074	0.040476	0.962083	949	2	Stk40	0.023192	0.040943	0.945949	949	1	Olfr1038-ps	0.023131	0.04185	0.987813	949	2
Tmem145	6	0.019092	0.040503	0.962083	950	2	Haus8	0.023192	0.040943	0.945949	950	1	Lgmn	0.023169	0.041903	0.987813	950	1
Ccdc102a	6	0.0191	0.040513	0.962083	951	2	Plxnb2	0.023192	0.040943	0.945949	951	1	Zc3h14	0.023215	0.041974	0.987813	951	1
Gulo	6	0.019174	0.040621	0.962083	952	2	Gm2696	0.023192	0.040943	0.945949	952	1	NonTargetingControlGuideForMouse_0691	0.023233	0.042007	0.987813	952	1
Dcaf10	6	0.019186	0.040639	0.962083	953	1	Dnajc24	0.023192	0.040943	0.945949	953	1	Tor1aip1	0.023262	0.042053	0.987813	953	1
Klra3	6	0.019193	0.040653	0.962083	954	2	Nr3c2	0.023192	0.040943	0.945949	954	1	Pla2g7	0.023309	0.042133	0.987813	954	1
Slco2b1	6	0.019233	0.040714	0.962083	955	1	Atp10b	0.023192	0.040943	0.945949	955	1	Asb7	0.023403	0.042277	0.987813	955	1
mmu-mir-875	4	0.019272	0.040765	0.962083	956	1	Nhlrc3	0.023192	0.040943	0.945949	956	1	Mettl6	0.023449	0.042341	0.987813	956	2
Lysmd4	6	0.01928	0.040779	0.962083	957	1	Elp5	0.023192	0.040943	0.945949	957	1	2610528J11Rik	0.023458	0.042359	0.987813	957	2
mmu-mir-6396	4	0.019303	0.040812	0.962083	958	2	Nps	0.023192	0.040943	0.945949	958	1	Mrgpra9	0.023492	0.042407	0.987813	958	2
Hsd3b1	6	0.019327	0.040849	0.962083	959	2	Rcn1	0.023192	0.040943	0.945949	959	1	Rybp	0.023543	0.042481	0.987813	959	1
Scnm1	6	0.019374	0.040919	0.962083	960	1	Rcc2	0.023192	0.040943	0.945949	960	1	Aifm2	0.02359	0.042556	0.987813	960	2
mmu-mir-93	4	0.019397	0.040955	0.962083	961	1	Stat4	0.023192	0.040943	0.945949	961	1	Gm5640	0.023601	0.042573	0.987813	961	2
Tmem150a	6	0.019421	0.040986	0.962083	962	1	Gamt	0.023192	0.040943	0.945949	962	1	Map1b	0.02361	0.042586	0.987813	962	2
Mdh1	6	0.019436	0.041009	0.962083	963	2	Gpr15	0.023192	0.040943	0.945949	963	1	Napsa	0.023636	0.042627	0.987813	963	1
Esr1	6	0.019468	0.041059	0.962083	964	1	Anxa10	0.023192	0.040943	0.945949	964	1	Sprtn	0.02377	0.042833	0.987813	964	2
Gm15800	6	0.019515	0.041125	0.962083	965	1	R3hdm1	0.023192	0.040943	0.945949	965	1	Srsf4	0.023779	0.042845	0.987813	965	2
Vmn1r51	6	0.019537	0.041157	0.962083	966	2	Dapk2	0.023192	0.040943	0.945949	966	1	Olfr645	0.0238	0.042877	0.987813	966	1
Thbs3	6	0.019562	0.041193	0.962083	967	1	Nudt19	0.023192	0.040943	0.945949	967	1	Nfkbia	0.0238	0.042877	0.987813	967	1
Eltd1	6	0.019599	0.041246	0.962083	968	2	Ptchd3	0.023192	0.040943	0.945949	968	1	Mrps10	0.0238	0.042877	0.987813	968	1
C87977	6	0.019608	0.041257	0.962083	969	2	Ninl	0.023192	0.040943	0.945949	969	1	Pgc	0.0238	0.042877	0.987813	969	1
AI593442	6	0.019653	0.041335	0.962083	970	2	Eif2s1	0.023192	0.040943	0.945949	970	1	Scgb1c1	0.0238	0.042877	0.987813	970	2
Paip1	6	0.019655	0.041338	0.962083	971	1	Gm11744	0.023192	0.040943	0.945949	971	1	Arid3b	0.023829	0.042921	0.987813	971	2
Rnf139	6	0.019702	0.041411	0.962083	972	1	Maff	0.023192	0.040943	0.945949	972	1	Zw10	0.023829	0.042921	0.987813	972	2
Pan3	6	0.019708	0.041419	0.962083	973	2	Mcm2	0.023192	0.040943	0.945949	973	1	Olfr205	0.023829	0.042921	0.987813	973	2
Fgf5	6	0.019743	0.041471	0.962083	974	2	BC022687	0.023192	0.040943	0.945949	974	1	Car5b	0.023829	0.042921	0.987813	974	2
Trim46	6	0.019749	0.041482	0.962083	975	1	Asun	0.023192	0.040943	0.945949	975	1	U2af1	0.023829	0.042921	0.987813	975	2
Car9	6	0.01977	0.041517	0.962083	976	2	Optc	0.023192	0.040943	0.945949	976	1	mmu-mir-6369	0.023902	0.04304	0.987813	976	1
Slc7a14	6	0.019796	0.041556	0.962083	977	1	Cdt1	0.023192	0.040943	0.945949	977	2	Apoa2	0.023964	0.04314	0.987813	977	1
0610030E20Rik	6	0.019843	0.041631	0.962841	978	1	Lbh	0.023192	0.040943	0.945949	978	1	Lhpp	0.02401	0.043201	0.987813	978	2
Colgalt2	6	0.01989	0.041706	0.963156	979	1	Hsd17b1	0.023192	0.040943	0.945949	979	1	Prrg1	0.024012	0.043204	0.987813	979	2
Tfec	6	0.019934	0.041769	0.963156	980	2	Trerf1	0.023232	0.041001	0.946328	980	2	Tmem109	0.024012	0.043204	0.987813	980	2
Vps4b	6	0.019937	0.041773	0.963156	981	1	Phf8	0.023273	0.04107	0.946947	981	2	Micu1	0.024012	0.043204	0.987813	981	2
Olfr561	6	0.019984	0.041848	0.96391	982	1	Cetn2	0.023332	0.041164	0.948161	982	2	Ccdc159	0.024012	0.043204	0.987813	982	2
Pyroxd2	6	0.020031	0.041919	0.964571	983	2	Ankrd26	0.023458	0.041352	0.951143	983	2	Stag3	0.024012	0.043204	0.987813	983	2
Rnf150	6	0.020077	0.041987	0.964822	984	1	Msl3	0.023509	0.041426	0.951143	984	2	Evi5	0.024012	0.043204	0.987813	984	2
Hap1	6	0.020107	0.042025	0.964822	985	2	Nsmf	0.023517	0.041441	0.951143	985	2	Clcnkb	0.024104	0.043344	0.987813	985	1
Adat1	6	0.020217	0.042193	0.964822	986	2	NonTargetingControlGuideForMouse_0748	0.023535	0.041462	0.951143	986	1	Nagpa	0.024197	0.043481	0.987813	986	1
P2ry12	6	0.020265	0.042265	0.964822	987	1	Zfp266	0.023669	0.041675	0.954799	987	2	2310039H08Rik	0.024244	0.043559	0.987813	987	1
Gm11435	6	0.020312	0.042341	0.964822	988	1	Litaf	0.023686	0.041706	0.954799	988	2	Mllt6	0.024337	0.043711	0.987813	988	1
Gjb1	6	0.020359	0.042412	0.964822	989	1	Crebzf	0.02377	0.04185	0.957137	989	2	Zfp382	0.024374	0.043766	0.987813	989	2
Gpnmb	6	0.020398	0.042474	0.964822	990	2	Dip2a	0.02394	0.042115	0.960271	990	2	Dffb	0.024431	0.043858	0.987813	990	1
Serpinb6c	6	0.020406	0.042485	0.964822	991	1	Zswim7	0.02394	0.042115	0.960271	991	2	Il10	0.02446	0.043904	0.987813	991	2
Glcci1	6	0.020493	0.042621	0.964822	992	2	Npas1	0.02394	0.042115	0.960271	992	2	Gm5108	0.024468	0.043919	0.987813	992	2
Ano4	6	0.0205	0.042632	0.964822	993	1	NonTargetingControlGuideForMouse_0519	0.02398	0.042172	0.96062	993	1	Vmn2r5	0.024478	0.043937	0.987813	993	2
Eqtn	6	0.020501	0.042633	0.964822	994	2	Grhl3	0.024071	0.042305	0.960739	994	2	Ebag9	0.024502	0.043965	0.987813	994	2
Aars	6	0.020546	0.042699	0.964822	995	1	Ubtfl1	0.024071	0.042305	0.960739	995	2	Smg1	0.02452	0.044004	0.987813	995	2
Grm7	6	0.02064	0.042848	0.964822	996	1	Kif18a	0.024071	0.042305	0.960739	996	2	Arhgef39	0.024524	0.044012	0.987813	996	2
Serpinb3d	6	0.02066	0.042877	0.964822	997	2	Calu	0.024127	0.042391	0.961722	997	2	Pex1	0.024571	0.04409	0.987813	997	2
S100b	6	0.020687	0.042927	0.964822	998	1	Jak1	0.024306	0.042655	0.96675	998	2	Tktl2	0.024571	0.04409	0.987813	998	1
Hist4h4	6	0.020763	0.043045	0.964822	999	2	Vmn2r30	0.024524	0.042994	0.966965	999	1	Syn3	0.024597	0.044131	0.987813	999	2
Ptprj	6	0.020851	0.043186	0.964822	1000	1	Sp1	0.024605	0.043122	0.966965	1000	2	Iyd	0.024683	0.044271	0.987813	1000	2
Hps3	6	0.020851	0.043186	0.964822	1001	2	Hap1	0.02464	0.043178	0.966965	1001	2	Polr2a	0.024688	0.044277	0.987813	1001	2
Polr2b	6	0.020851	0.043186	0.964822	1002	2	Rfx8	0.024711	0.043289	0.966965	1002	1	Myo16	0.024688	0.044277	0.987813	1002	1
Ncoa5	6	0.020851	0.043186	0.964822	1003	1	Rit2	0.024758	0.043354	0.966965	1003	1	Serpinb3b	0.024694	0.044287	0.987813	1003	1
Sucla2	6	0.020851	0.043186	0.964822	1004	2	Fam178a	0.024846	0.043487	0.966965	1004	2	mmu-mir-7235	0.024745	0.04436	0.987813	1004	1
Rab11a	6	0.020987	0.043398	0.964822	1005	2	Ambra1	0.024872	0.04353	0.966965	1005	2	Lgr4	0.024758	0.044379	0.987813	1005	1
Map2k4	6	0.021003	0.043428	0.964822	1006	2	Cdip1	0.024898	0.043569	0.966965	1006	1	Vmn2r111	0.024764	0.044392	0.987813	1006	2
Dock8	6	0.021035	0.043476	0.964822	1007	2	mmu-mir-1190	0.024901	0.043572	0.966965	1007	1	Cntn3	0.024805	0.044455	0.987813	1007	2
Zfp182	6	0.021062	0.04352	0.964822	1008	1	Pdcd10	0.024945	0.043635	0.966965	1008	1	Ulk3	0.024851	0.044518	0.987813	1008	1
Gm15023	3	0.021064	0.043523	0.964822	1009	1	1700003M02Rik	0.024967	0.043673	0.966965	1009	2	Tmem56	0.024898	0.044593	0.987813	1009	1
Lyplal1	6	0.021067	0.043527	0.964822	1010	2	Rock1	0.024993	0.043713	0.966965	1010	2	Ccdc9	0.024945	0.044662	0.987813	1010	1
Cct8l1	6	0.021075	0.043538	0.964822	1011	2	Als2cl	0.025036	0.043787	0.966965	1011	2	Hid1	0.024959	0.04468	0.987813	1011	2
1700026D08Rik	6	0.021123	0.043607	0.964822	1012	2	Sgta	0.025038	0.04379	0.966965	1012	2	Vps51	0.024991	0.044731	0.987813	1012	1
Gpr52	6	0.021156	0.043664	0.964822	1013	1	Gm5640	0.02508	0.043857	0.966965	1013	2	mmu-mir-547	0.024994	0.044736	0.987813	1013	1
Rilp	6	0.021203	0.04373	0.964822	1014	1	Ogn	0.025085	0.043865	0.966965	1014	1	Fkbp6	0.025038	0.044808	0.987813	1014	2
Rab32	6	0.021273	0.04383	0.964822	1015	1	Ccdc177	0.025088	0.04387	0.966965	1015	2	Vmn1r43	0.025062	0.044849	0.987813	1015	2
Nap1l2	6	0.021273	0.04383	0.964822	1016	1	Rnf139	0.025132	0.043935	0.966965	1016	1	Trim30b	0.025085	0.044881	0.987813	1016	1
Vip	6	0.021343	0.043936	0.964822	1017	1	Pde4d	0.02521	0.044064	0.966965	1017	2	Gspt1	0.025132	0.044945	0.987813	1017	1
Zfp39	6	0.02139	0.044004	0.964822	1018	2	Nagpa	0.025225	0.044085	0.966965	1018	1	Khdrbs3	0.025178	0.04502	0.987813	1018	1
Aire	6	0.02147	0.044115	0.964822	1019	2	Lpin3	0.025272	0.044165	0.966965	1019	1	Map4k3	0.025201	0.04506	0.987813	1019	2
Clca5	6	0.02147	0.044115	0.964822	1020	2	Olfr652	0.025288	0.044193	0.966965	1020	2	Paip1	0.025225	0.045092	0.987813	1020	1
Olfr466	6	0.02147	0.044115	0.964822	1021	2	Dppa3	0.025318	0.044239	0.966965	1021	1	NonTargetingControlGuideForMouse_0940	0.025236	0.045118	0.987813	1021	1
Adck5	6	0.02147	0.044115	0.964822	1022	2	Mycbpap	0.025331	0.044263	0.966965	1022	2	Glis2	0.02527	0.045178	0.987813	1022	2
Qars	6	0.02147	0.044115	0.964822	1023	2	9130011E15Rik	0.025349	0.044285	0.966965	1023	2	Mid1	0.025305	0.045226	0.987813	1023	2
Surf4	6	0.02147	0.044115	0.964822	1024	2	Htr1b	0.025357	0.044298	0.966965	1024	2	Olfr1230	0.025318	0.045249	0.987813	1024	2
Fam63a	6	0.02147	0.044115	0.964822	1025	2	Pgm5	0.025365	0.044311	0.966965	1025	1	Zfp36l1	0.025365	0.045323	0.987813	1025	1
Acsm3	6	0.02147	0.044115	0.964822	1026	2	Klk1b3	0.025383	0.044339	0.966965	1026	2	Olfr589	0.025449	0.04545	0.987813	1026	2
Chst5	6	0.02147	0.044115	0.964822	1027	2	Zfp120	0.025427	0.044406	0.966965	1027	2	Exoc3l	0.025449	0.04545	0.987813	1027	2
Efhd2	6	0.021484	0.044147	0.964822	1028	1	Tcf12	0.025436	0.044422	0.966965	1028	2	Adamts8	0.025449	0.04545	0.987813	1028	2
AY761184	5	0.021495	0.044166	0.964822	1029	1	Eif4a2	0.025458	0.044457	0.966965	1029	1	Vmn2r12	0.025458	0.045461	0.987813	1029	1
Olfr782	6	0.02153	0.044217	0.964822	1030	1	Car5b	0.025471	0.04447	0.966965	1030	2	Zfp652	0.025641	0.045747	0.987813	1030	2
Htra3	6	0.021577	0.044291	0.964822	1031	1	Slc25a46	0.025488	0.044496	0.966965	1031	2	Bex4	0.025738	0.045912	0.987813	1031	1
Anxa8	6	0.021624	0.044366	0.964822	1032	1	Ndst3	0.025505	0.044532	0.966965	1032	1	Map3k6	0.025738	0.045912	0.987813	1032	1
Fam92a	6	0.021671	0.044445	0.964822	1033	2	Olfr556	0.025532	0.044566	0.966965	1033	2	Abhd15	0.025738	0.045912	0.987813	1033	1
Sdr39u1	6	0.021718	0.044521	0.964822	1034	1	Olfr205	0.02561	0.044692	0.966965	1034	2	Fcf1	0.025738	0.045912	0.987813	1034	1
Akap5	6	0.02173	0.044536	0.964822	1035	2	Hbb-b2	0.025642	0.044744	0.966965	1035	1	Rpl19	0.025738	0.045912	0.987813	1035	1
Cdkl3	6	0.021765	0.044595	0.964822	1036	2	1700003F12Rik	0.025668	0.044786	0.966965	1036	1	Ccdc150	0.025738	0.045912	0.987813	1036	1
Gp2	6	0.021778	0.044616	0.964822	1037	2	Vmn2r74	0.025668	0.044786	0.966965	1037	1	Acot3	0.025794	0.045994	0.987813	1037	2
Cabs1	6	0.021791	0.044638	0.964822	1038	2	Ttc18	0.025668	0.044786	0.966965	1038	1	Gria2	0.025847	0.046067	0.987813	1038	2
Myot	6	0.021811	0.044664	0.964822	1039	1	Mdn1	0.025668	0.044786	0.966965	1039	1	Txndc8	0.025895	0.046136	0.987813	1039	2
Net1	6	0.021827	0.044682	0.964822	1040	2	Trpv5	0.025668	0.044786	0.966965	1040	2	Gm94	0.025895	0.046136	0.987813	1040	2
Gas1	6	0.021858	0.044731	0.964822	1041	1	Slc22a8	0.025671	0.044791	0.966965	1041	2	Cmtr1	0.025895	0.046136	0.987813	1041	2
Tstd1	6	0.021905	0.044806	0.964822	1042	1	Blnk	0.025706	0.044837	0.966965	1042	2	Snx14	0.025895	0.046136	0.987813	1042	2
NonTargetingControlGuideForMouse_0181	1	0.021937	0.044851	0.964822	1043	1	Parp9	0.02582	0.045006	0.966965	1043	2	Pfkfb4	0.025895	0.046136	0.987813	1043	2
Dtx3	6	0.021941	0.044862	0.964822	1044	2	Bcl9l	0.025878	0.045084	0.966965	1044	1	CK137956	0.026018	0.046336	0.987813	1044	1
Slfn2	6	0.021952	0.044879	0.964822	1045	2	LOC666331	0.025925	0.045156	0.966965	1045	1	H1f0	0.026031	0.046351	0.987813	1045	2
Zfp868	6	0.02199	0.044925	0.964822	1046	2	mmu-mir-3091	0.025977	0.045243	0.966965	1046	1	9230112D13Rik	0.026112	0.046484	0.987813	1046	2
BC049635	6	0.022046	0.045016	0.964822	1047	1	Mettl7a3	0.025977	0.045243	0.966965	1047	1	Zfp600	0.026152	0.046547	0.987813	1047	2
Xxylt1	6	0.022048	0.045018	0.964822	1048	2	Gphb5	0.025987	0.04526	0.966965	1048	2	Tmem53	0.026158	0.046557	0.987813	1048	1
Uba3	6	0.022064	0.045036	0.964822	1049	2	Tmem30c	0.026075	0.045392	0.966965	1049	2	Csnk1g3	0.026172	0.046579	0.987813	1049	2
Epn3	6	0.022092	0.045074	0.964822	1050	1	Iqch	0.026112	0.045449	0.966965	1050	1	Magea10	0.026207	0.046628	0.987813	1050	2
Foxr2	6	0.022139	0.045145	0.964822	1051	2	Tlcd1	0.026135	0.045489	0.966965	1051	1	Sgta	0.026252	0.046698	0.987813	1051	1
Tnfrsf8	6	0.02215	0.045159	0.964822	1052	2	Gatad1	0.026158	0.045531	0.966965	1052	1	Olfr695	0.02634	0.046844	0.987813	1052	2
Cxcl17	6	0.022186	0.045212	0.964822	1053	1	Ormdl2	0.026194	0.04559	0.966965	1053	2	Pianp	0.026345	0.046851	0.987813	1053	1
Vmn2r5	6	0.022233	0.045285	0.964822	1054	1	Acer1	0.026194	0.04559	0.966965	1054	2	Olfr399	0.026402	0.046954	0.987813	1054	2
Cul7	6	0.02228	0.045352	0.964822	1055	1	Isg15	0.026205	0.045605	0.966965	1055	1	Samhd1	0.026419	0.046986	0.987813	1055	2
Clec2e	6	0.022326	0.045418	0.964822	1056	1	Myb	0.026251	0.045682	0.966965	1056	2	Rab27b	0.026428	0.047006	0.987813	1056	2
Olfr843	6	0.022393	0.045518	0.964822	1057	2	Dnah7a	0.026252	0.045682	0.966965	1057	1	Frmpd1	0.026438	0.047018	0.987813	1057	1
Dcp1a	6	0.02242	0.045559	0.964822	1058	1	Olfr669	0.02626	0.045697	0.966965	1058	2	Cnot6l	0.026485	0.047087	0.987813	1058	2
Vmn1r82	6	0.022467	0.045626	0.964822	1059	1	1190007I07Rik	0.026296	0.045758	0.966965	1059	2	Pcdhga1	0.026524	0.047153	0.987813	1059	1
Olfr860	6	0.022487	0.04566	0.964822	1060	2	Edn1	0.026298	0.045766	0.966965	1060	2	Rtel1	0.026532	0.047161	0.987813	1060	1
Fga	6	0.02256	0.045767	0.964822	1061	1	Agmat	0.02634	0.04583	0.966965	1061	2	Rb1	0.026552	0.047191	0.987813	1061	2
Nup160	6	0.022607	0.045844	0.964822	1062	1	NonTargetingControlGuideForMouse_0915	0.026341	0.045831	0.966965	1062	1	Gnai1	0.026578	0.047237	0.987813	1062	1
Il18rap	6	0.022616	0.045855	0.964822	1063	2	Vmn2r114	0.026345	0.045836	0.966965	1063	1	Aspdh	0.026625	0.047307	0.987813	1063	1
Tlr12	6	0.022654	0.045914	0.964822	1064	1	Metap1d	0.026402	0.045936	0.966965	1064	2	Igsf9b	0.026672	0.047382	0.987813	1064	1
mmu-mir-758	4	0.022689	0.045961	0.964822	1065	2	Il1r1	0.026411	0.045949	0.966965	1065	2	Sat1	0.026677	0.047389	0.987813	1065	2
Traf2	6	0.022707	0.045987	0.964822	1066	2	3830417A13Rik	0.026437	0.045997	0.966965	1066	2	Ccdc91	0.026718	0.04745	0.987813	1066	1
Akr1c6	6	0.022748	0.046054	0.964822	1067	1	Golga4	0.026438	0.045999	0.966965	1067	1	Olfr1537	0.026748	0.0475	0.987813	1067	2
Rorc	6	0.022794	0.046128	0.964822	1068	2	Stard13	0.026464	0.046039	0.966965	1068	2	Nhlh2	0.026765	0.047525	0.987813	1068	1
Gm14124	5	0.022796	0.046133	0.964822	1069	2	Lonrf2	0.026485	0.046076	0.966965	1069	1	4921511H03Rik	0.026801	0.047575	0.987813	1069	2
Cdkn2d	6	0.022841	0.046208	0.964822	1070	1	Cramp1l	0.026532	0.04615	0.966965	1070	1	BC089597	0.02681	0.047586	0.987813	1070	2
Pprc1	6	0.022856	0.046223	0.964822	1071	2	Emilin2	0.02657	0.046207	0.966965	1071	2	Cdh2	0.026858	0.047665	0.987813	1071	1
Ecel1	6	0.022888	0.046271	0.964822	1072	1	Rcan1	0.02657	0.046207	0.966965	1072	2	Kdm5b	0.026905	0.047735	0.987813	1072	1
mmu-mir-344g	4	0.022902	0.046286	0.964822	1073	1	Zfp869	0.02657	0.046207	0.966965	1073	2	Gm15800	0.026951	0.047809	0.987813	1073	1
Fgf13	6	0.022923	0.046317	0.964822	1074	2	Epb4.1l3	0.02657	0.046207	0.966965	1074	2	Gm514	0.02698	0.047858	0.987813	1074	2
Car2	6	0.022931	0.046334	0.964822	1075	2	Olfr1186	0.02657	0.046207	0.966965	1075	2	Svs2	0.026998	0.047887	0.987813	1075	1
Ndufv3	6	0.022935	0.046341	0.964822	1076	1	Hoxc5	0.02657	0.046207	0.966965	1076	2	Fam227b	0.027016	0.047918	0.987813	1076	2
C030046E11Rik	6	0.022982	0.04642	0.964822	1077	1	Ptpn21	0.026578	0.046221	0.966965	1077	1	Vwc2l	0.027034	0.047945	0.987813	1077	2
Fam133b	6	0.023023	0.046485	0.964822	1078	2	Ebp	0.026659	0.04635	0.966965	1078	2	Rrp8	0.02706	0.047983	0.987813	1078	2
Entpd6	6	0.023028	0.046491	0.964822	1079	1	Itih4	0.026672	0.04637	0.966965	1079	1	Slc25a17	0.027091	0.048031	0.987813	1079	1
Cdo1	6	0.023056	0.046534	0.964822	1080	2	Fbxo28	0.026686	0.046389	0.966965	1080	2	Afap1l1	0.027105	0.048051	0.987813	1080	2
Vat1l	6	0.023073	0.04656	0.964822	1081	2	Tax1bp1	0.026718	0.046445	0.966965	1081	1	Vsig8	0.027141	0.048104	0.987813	1081	2
Gkn3	6	0.023075	0.046566	0.964822	1082	1	Oas1f	0.026739	0.046481	0.966965	1082	2	M6pr	0.027184	0.048163	0.987813	1082	1
H2-T24	6	0.023081	0.046576	0.964822	1083	2	Gm11435	0.026765	0.046528	0.966965	1083	1	Ndufb5	0.027278	0.048312	0.987813	1083	1
Mns1	6	0.023106	0.046615	0.964822	1084	2	Cga	0.026766	0.04653	0.966965	1084	2	Ghdc	0.027285	0.048324	0.987813	1084	2
Pced1b	6	0.023114	0.046626	0.964822	1085	2	Ptges2	0.026837	0.04663	0.966965	1085	2	Dpys	0.027302	0.048348	0.987813	1085	2
Nipbl	6	0.023122	0.046633	0.964822	1086	1	Garnl3	0.026855	0.04666	0.966965	1086	2	Agl	0.02732	0.048376	0.987813	1086	2
Herc4	6	0.023169	0.046698	0.964822	1087	1	Gm5886	0.026858	0.046666	0.966965	1087	1	Bop1	0.027365	0.048449	0.987813	1087	2
Itga4	6	0.023215	0.046767	0.964822	1088	1	Gsdmc4	0.026905	0.046734	0.966965	1088	1	Nog	0.027371	0.048458	0.987813	1088	1
NonTargetingControlGuideForMouse_0286	1	0.023217	0.046768	0.964822	1089	1	Sgpp2	0.026908	0.046743	0.966965	1089	2	Clec2l	0.027417	0.048524	0.987813	1089	1
Arhgef3	6	0.023262	0.046837	0.964822	1090	1	Zmym1	0.026944	0.046797	0.966965	1090	2	Col5a2	0.027433	0.048548	0.987813	1090	2
mmu-let-7j	4	0.023277	0.046858	0.964822	1091	1	9830147E19Rik	0.026951	0.046809	0.966965	1091	1	Tmem30c	0.027464	0.048596	0.987813	1091	2
mmu-mir-6988	4	0.023308	0.04691	0.964822	1092	1	Hid1	0.026953	0.046816	0.966965	1092	2	Ubxn11	0.027511	0.048663	0.987813	1092	2
Fkbp3	6	0.023309	0.046911	0.964822	1093	1	Gfpt1	0.02698	0.046859	0.966965	1093	2	Cyp2j13	0.027604	0.048802	0.987813	1093	1
Rgs2	6	0.023349	0.046974	0.964822	1094	2	Serpinb9f	0.026998	0.046891	0.966965	1094	1	Grlf1	0.02765	0.048874	0.987813	1094	1
Papl	6	0.023356	0.046984	0.964822	1095	2	Hint2	0.027045	0.046965	0.966965	1095	2	Foxp4	0.027672	0.048906	0.987813	1095	2
Prmt3	6	0.023403	0.047054	0.964822	1096	1	Zfr	0.027051	0.046978	0.966965	1096	2	Dedd2	0.02769	0.048939	0.987813	1096	2
Dnase1l1	6	0.023483	0.047166	0.964822	1097	2	Olfr243	0.027087	0.04703	0.966965	1097	2	Kncn	0.027697	0.048944	0.987813	1097	1
Rasip1	6	0.023496	0.047187	0.964822	1098	2	Fads3	0.027091	0.047036	0.966965	1098	1	Sprr2d	0.027699	0.048946	0.987813	1098	2
Slc11a1	6	0.0235	0.047191	0.964822	1099	2	Car6	0.027137	0.047102	0.966965	1099	2	Ccr3	0.027735	0.048996	0.987813	1099	2
mmu-mir-6954	4	0.023593	0.047333	0.964822	1100	2	Serpinb13	0.027138	0.047105	0.966965	1100	1	Olfr457	0.027762	0.049038	0.987813	1100	2
Zfp653	6	0.023601	0.047345	0.964822	1101	2	3632451O06Rik	0.02715	0.047122	0.966965	1101	2	Lonrf2	0.02779	0.049082	0.987813	1101	1
Mmp21	6	0.023636	0.047397	0.964822	1102	1	Fgf12	0.027168	0.047152	0.966965	1102	2	Ergic3	0.027798	0.049095	0.987813	1102	2
Ergic2	6	0.02366	0.047428	0.964822	1103	2	Gimap1	0.027184	0.047177	0.966965	1103	1	NonTargetingControlGuideForMouse_0045	0.02782	0.049123	0.987813	1103	1
Rpl10a	6	0.023683	0.047468	0.964822	1104	1	Vmn2r88	0.027195	0.047196	0.966965	1104	2	Ptprr	0.027837	0.049151	0.987813	1104	1
Arg1	6	0.023777	0.04761	0.964822	1105	1	Gm8298	0.027231	0.047253	0.967255	1105	1	Myoz1	0.02788	0.049211	0.987813	1105	2
Mblac1	6	0.023796	0.047647	0.964822	1106	2	Cgrrf1	0.027285	0.047341	0.967951	1106	2	Ccr4	0.02788	0.049211	0.987813	1106	2
Gm14325	6	0.023823	0.047682	0.964822	1107	1	Vmn1r66	0.027347	0.04744	0.967951	1107	2	Mcts2	0.02788	0.049211	0.987813	1107	2
Ptges2	6	0.023897	0.047807	0.964822	1108	2	Hnrnpr	0.027371	0.047475	0.967951	1108	1	Zcchc7	0.02788	0.049211	0.987813	1108	2
Kctd10	6	0.023917	0.047836	0.964822	1109	1	Asap3	0.027417	0.047544	0.967951	1109	1	Sdr39u1	0.027883	0.049217	0.987813	1109	1
Prtg	6	0.023931	0.047851	0.964822	1110	2	Stk31	0.027464	0.047619	0.967951	1110	1	Shbg	0.027977	0.049366	0.987813	1110	2
Fkbp1b	6	0.023964	0.047899	0.964822	1111	1	AY761184	0.027496	0.047672	0.967951	1111	1	Zfp366	0.028023	0.049444	0.987813	1111	2
Wdr43	6	0.02401	0.047962	0.964822	1112	1	Exoc8	0.027511	0.04769	0.967951	1112	1	Tspyl4	0.028062	0.049502	0.987813	1112	2
Vmn1r191	6	0.024071	0.048058	0.964822	1113	2	Rhox8	0.027557	0.047756	0.967951	1113	1	Slc35f6	0.02807	0.049515	0.987813	1113	1
Wdfy2	6	0.02411	0.048121	0.964822	1114	2	NonTargetingControlGuideForMouse_0322	0.027565	0.047769	0.967951	1114	1	Ubash3a	0.028116	0.049581	0.987813	1114	1
Gm13125	6	0.024127	0.048144	0.964822	1115	2	Hormad1	0.027627	0.047859	0.967951	1115	2	Fam166b	0.028163	0.049651	0.987813	1115	1
Ucp2	6	0.024151	0.048173	0.964822	1116	1	Prkacb	0.027649	0.047893	0.967951	1116	2	Ly86	0.028256	0.049801	0.987813	1116	1
Pusl1	6	0.024161	0.048192	0.964822	1117	2	Taar7f	0.027753	0.048056	0.967951	1117	2	Ptplad1	0.028303	0.049879	0.987813	1117	2
Col3a1	6	0.024178	0.048214	0.964822	1118	2	Ap1g1	0.027762	0.048068	0.967951	1118	2	mmu-mir-488	0.028328	0.049926	0.987813	1118	1
Ccdc171	6	0.024197	0.048241	0.964822	1119	1	Slain1	0.02788	0.048253	0.967951	1119	2	Pcif1	0.028349	0.049954	0.987813	1119	2
mmu-mir-488	4	0.024245	0.048319	0.964822	1120	2	Rsrc2	0.027977	0.048406	0.967951	1120	1	Ube2z	0.02838	0.050001	0.987813	1120	2
Mppe1	6	0.024246	0.048319	0.964822	1121	2	Rnf149	0.027977	0.048406	0.967951	1121	1	Zfp106	0.028442	0.0501	0.987813	1121	1
Thrap3	6	0.024263	0.048349	0.964822	1122	2	Ttc37	0.027977	0.048406	0.967951	1122	1	Napg	0.028481	0.050169	0.987813	1122	2
Slc25a31	6	0.024291	0.048385	0.964822	1123	1	Zfp563	0.027977	0.048406	0.967951	1123	1	Slc35b3	0.028489	0.050186	0.987813	1123	1
Scamp3	6	0.024337	0.048452	0.964822	1124	1	Ttc7b	0.027977	0.048406	0.967951	1124	1	C87977	0.028582	0.050336	0.987813	1124	1
Cdkal1	6	0.02434	0.048456	0.964822	1125	2	Kntc1	0.027977	0.048406	0.967951	1125	1	Cep85l	0.028629	0.050403	0.987813	1125	1
Msl3	6	0.024383	0.048517	0.964822	1126	2	Dcps	0.027977	0.048406	0.967951	1126	1	Pparg	0.028632	0.05041	0.987813	1126	2
Wdr77	6	0.024384	0.048519	0.964822	1127	1	Mlf2	0.027977	0.048406	0.967951	1127	1	Mylk4	0.028632	0.05041	0.987813	1127	2
Macrod1	6	0.024431	0.048595	0.964822	1128	1	Kcnb2	0.027977	0.048406	0.967951	1128	1	Unc80	0.028632	0.05041	0.987813	1128	2
Scgb1b3	4	0.024443	0.048614	0.964822	1129	2	Def8	0.027977	0.048406	0.967951	1129	1	Mthfd2	0.028675	0.05048	0.987813	1129	1
Jmjd4	6	0.024468	0.048652	0.964822	1130	2	Gnb2l1	0.027977	0.048406	0.967951	1130	1	Crebbp	0.028692	0.050505	0.987813	1130	2
mmu-mir-465d	3	0.024469	0.048654	0.964822	1131	1	Vmn2r24	0.027977	0.048406	0.967951	1131	1	Mrgprh	0.028722	0.050551	0.987813	1131	1
Taf1	6	0.024478	0.048669	0.964822	1132	1	Olfr749	0.028007	0.048459	0.967951	1132	2	Ang5	0.028756	0.050598	0.987813	1132	2
Prrt2	6	0.02452	0.048733	0.964822	1133	2	Jam3	0.028025	0.048485	0.967951	1133	2	Bpifb1	0.028784	0.050637	0.987813	1133	2
1110004F10Rik	6	0.024524	0.048742	0.964822	1134	1	Gsk3b	0.02808	0.048565	0.968217	1134	2	Abi2	0.028793	0.050652	0.987813	1134	2
Cplx2	6	0.024537	0.048753	0.964822	1135	2	Rprml	0.028089	0.048584	0.968217	1135	2	Pmp2	0.028802	0.050665	0.987813	1135	2
A630076J17Rik	6	0.024597	0.048849	0.964822	1136	2	Mdh1	0.028289	0.048897	0.973489	1136	2	Ccnj	0.028815	0.050687	0.987813	1136	1
Ctf2	6	0.024618	0.048874	0.964822	1137	1	Tgfbr3	0.028335	0.048978	0.973489	1137	2	Gltscr2	0.028861	0.050763	0.987813	1137	1
C1qtnf1	6	0.024665	0.048949	0.964822	1138	1	Tas2r134	0.028371	0.049029	0.973489	1138	2	Krt36	0.028894	0.050825	0.987813	1138	2
Cd83	6	0.024709	0.049012	0.964822	1139	2	mmu-mir-451a	0.028381	0.049039	0.973489	1139	1	Cyp3a57	0.028908	0.050845	0.987813	1139	1
Hspb9	6	0.024711	0.049015	0.964822	1140	2	Ube2j1	0.028396	0.049064	0.973489	1140	1	Fam175b	0.028954	0.050922	0.987813	1140	1
Kpna3	5	0.02472	0.049025	0.964822	1141	2	Olfr181	0.028442	0.049139	0.974128	1141	1	Olfr530	0.029001	0.050994	0.987813	1141	1
Slc5a7	6	0.024734	0.049048	0.964822	1142	2	Slc2a8	0.028489	0.049226	0.974759	1142	1	Cables1	0.029032	0.051046	0.987813	1142	2
Nkx2-2	6	0.024758	0.049083	0.964822	1143	1	BC089597	0.028527	0.049286	0.974759	1143	2	Sox9	0.029048	0.051075	0.987813	1143	2
Pdk3	6	0.02482	0.049178	0.964822	1144	2	Rasgrp4	0.028535	0.0493	0.974759	1144	1	Cyc1	0.029094	0.051151	0.987813	1144	1
Chil6	6	0.024851	0.04922	0.964822	1145	1	Dmtf1	0.028582	0.049372	0.975317	1145	1	Cpeb4	0.029141	0.051226	0.987813	1145	1
Gm13177	6	0.024898	0.04929	0.964822	1146	1	Krtap19-9b	0.028722	0.049587	0.9757	1146	1	Zmym4	0.029234	0.051387	0.987813	1146	1
Olfr510	6	0.024907	0.049303	0.964822	1147	2	Nop14	0.028733	0.049607	0.9757	1147	2	Ptger4	0.02928	0.05146	0.987813	1147	1
Olfr243	6	0.024933	0.049341	0.964822	1148	2	Impa2	0.028733	0.049607	0.9757	1148	2	Asxl2	0.029346	0.051546	0.987813	1148	2
Olfr536	6	0.024991	0.049434	0.964822	1149	1	Ctnnbl1	0.028733	0.049607	0.9757	1149	2	Bysl	0.029346	0.051546	0.987813	1149	2
Arrdc2	6	0.025045	0.049511	0.964822	1150	2	Dpagt1	0.028733	0.049607	0.9757	1150	2	Trpc4	0.029346	0.051546	0.987813	1150	2
Hspd1	6	0.025085	0.049577	0.964822	1151	1	Pabpc2	0.028768	0.049657	0.97585	1151	1	Gm5127	0.029346	0.051546	0.987813	1151	2
Cspg4	6	0.025088	0.049582	0.964822	1152	2	Clec2l	0.028908	0.049896	0.979687	1152	1	Upf2	0.029346	0.051546	0.987813	1152	2
Mrgprh	6	0.025132	0.04964	0.964822	1153	2	Net1	0.029001	0.050039	0.980485	1153	2	Zkscan7	0.029373	0.05158	0.987813	1153	1
Arl6	6	0.025132	0.04964	0.964822	1154	2	Ehhadh	0.029014	0.050062	0.980485	1154	2	Ndufv3	0.02942	0.051636	0.987813	1154	1
Orm2	6	0.025149	0.049668	0.964822	1155	2	Colec12	0.029032	0.050084	0.980485	1155	2	Gpr56	0.029466	0.051703	0.987813	1155	1
Olfr1220	6	0.025178	0.04971	0.964822	1156	1	Gm1661	0.029048	0.05011	0.980485	1156	1	Stk31	0.029513	0.051777	0.987813	1156	1
Zfp595	6	0.025192	0.049735	0.964822	1157	2	Unc79	0.029141	0.050277	0.981114	1157	1	Olfr557	0.029513	0.051778	0.987813	1157	2
Bmx	6	0.025225	0.049785	0.964822	1158	1	Olfr350	0.029152	0.050295	0.981114	1158	2	Afg3l1	0.029541	0.051818	0.987813	1158	2
Olfr214	6	0.025272	0.049865	0.964822	1159	1	Cpne4	0.029187	0.050356	0.981114	1159	1	Mcur1	0.029551	0.051831	0.987813	1159	2
Cramp1l	6	0.025318	0.049931	0.964822	1160	1	Clec2f	0.029203	0.050375	0.981114	1160	2	Ctf2	0.029606	0.051914	0.987813	1160	1
Rnf144b	6	0.025383	0.050031	0.964822	1161	2	3110009E18Rik	0.029234	0.050435	0.981114	1161	1	Tex24	0.029616	0.051933	0.987813	1161	2
Olfr1230	6	0.025392	0.050044	0.964822	1162	2	Ccdc73	0.02928	0.050512	0.981114	1162	1	Dcbld1	0.029634	0.051962	0.987813	1162	2
Tmem56	6	0.025412	0.050069	0.964822	1163	1	Cst12	0.029291	0.050524	0.981114	1163	2	Vmn1r82	0.029644	0.051976	0.987813	1163	2
Olfr1260	6	0.025418	0.050083	0.964822	1164	2	Pcdhga1	0.029299	0.050535	0.981114	1164	1	Ush1g	0.029652	0.051988	0.987813	1164	1
2010107G12Rik	6	0.025444	0.050126	0.964822	1165	2	Cdh2	0.029327	0.050576	0.981114	1165	1	mmu-mir-27b	0.029666	0.052011	0.987813	1165	1
Hltf	6	0.025458	0.050148	0.964822	1166	1	P2ry10	0.029373	0.050638	0.981114	1166	1	Fhit	0.029745	0.052128	0.987813	1166	1
Sit1	6	0.025488	0.050185	0.964822	1167	2	Zfp866	0.02942	0.0507	0.981114	1167	1	Mblac1	0.029792	0.052197	0.987813	1167	1
Krtap14	6	0.025505	0.050216	0.964822	1168	2	Gjc3	0.029466	0.050768	0.981114	1168	1	Parvg	0.029821	0.052234	0.987813	1168	2
Amfr	6	0.025552	0.050281	0.964822	1169	1	Bpifb1	0.029467	0.050768	0.981114	1169	2	Scrt1	0.029838	0.052259	0.987813	1169	1
Amigo2	6	0.025558	0.05029	0.964822	1170	2	Ttc30a1	0.029504	0.050828	0.981114	1170	2	Olfr804	0.029839	0.052261	0.987813	1170	2
Hnrnpl	6	0.025598	0.050352	0.964822	1171	1	Prr9	0.029513	0.050838	0.981114	1171	2	Cic	0.029885	0.052337	0.987813	1171	2
Olfr556	6	0.025628	0.050405	0.964822	1172	2	Papl	0.029559	0.050906	0.981114	1172	1	Csn2	0.029916	0.052388	0.987813	1172	2
Ripk1	6	0.025645	0.050428	0.964822	1173	2	Vmn1r180	0.029606	0.050976	0.981114	1173	1	Olfr449	0.029931	0.052415	0.987813	1173	1
Noxred1	6	0.025645	0.050428	0.964822	1174	2	Serpinb3b	0.029632	0.051023	0.981114	1174	1	Gm20806	0.029941	0.052432	0.987813	1174	1
Pfkfb2	6	0.025692	0.050499	0.964822	1175	1	Kctd1	0.029652	0.051053	0.981114	1175	1	Ndst3	0.029978	0.052487	0.987813	1175	1
mmu-mir-199a-1	4	0.025737	0.050565	0.964822	1176	2	Phox2b	0.029811	0.051279	0.981114	1176	2	Gm4787	0.030024	0.052568	0.987813	1176	1
Nle1	6	0.025785	0.050637	0.964822	1177	1	Araf	0.029811	0.051279	0.981114	1177	2	Klb	0.030054	0.052612	0.987813	1177	2
Rps6kb2	6	0.025811	0.050672	0.964822	1178	2	Wdfy2	0.029811	0.051279	0.981114	1178	2	Cypt12	0.030117	0.052704	0.987813	1178	1
Prnp	6	0.025832	0.050698	0.964822	1179	1	Mc3r	0.029811	0.051279	0.981114	1179	2	1810030O07Rik	0.030164	0.052777	0.987813	1179	1
Spaca3	6	0.025847	0.050718	0.964822	1180	2	Slc10a6	0.029811	0.051279	0.981114	1180	2	1700015E13Rik	0.03021	0.052849	0.987813	1180	1
Vmn1r70	6	0.025878	0.050763	0.964822	1181	1	Abca13	0.029811	0.051279	0.981114	1181	2	Olfr605	0.030214	0.052852	0.987813	1181	2
Igf2r	6	0.025917	0.050819	0.964822	1182	2	Bves	0.029811	0.051279	0.981114	1182	2	Cyp3a25	0.030232	0.052883	0.987813	1182	2
Tmem53	6	0.025925	0.050831	0.964822	1183	1	Abcg2	0.029838	0.051313	0.981114	1183	1	Gpr126	0.030257	0.052921	0.987813	1183	1
mmu-mir-1190	4	0.02593	0.050839	0.964822	1184	1	Drg1	0.029978	0.051526	0.983814	1184	1	Csk	0.030303	0.052991	0.987813	1184	1
Olfr1310	6	0.025972	0.050907	0.964822	1185	1	Egfr	0.030024	0.051604	0.983814	1185	1	Rad9b	0.030317	0.053007	0.987813	1185	2
Gm12888	6	0.026013	0.050973	0.964822	1186	2	Flt1	0.030117	0.051738	0.983814	1186	1	Ankrd26	0.030383	0.053115	0.987813	1186	2
Olfr1424	6	0.026031	0.050998	0.964822	1187	2	1110004F10Rik	0.030164	0.051812	0.983814	1187	1	Mx2	0.030396	0.05314	0.987813	1187	1
Bpifa2	6	0.026112	0.051123	0.964822	1188	2	Sox9	0.03021	0.051875	0.983814	1188	1	Tnmd	0.030439	0.053208	0.987813	1188	2
Tyk2	6	0.026137	0.051164	0.964822	1189	2	Rpl22l1	0.030257	0.051956	0.983814	1189	1	Serpinb9f	0.030443	0.053214	0.987813	1189	1
Coro1a	6	0.026243	0.051319	0.964822	1190	2	Olfr804	0.030279	0.051991	0.983814	1190	2	Ogt	0.030489	0.053295	0.987813	1190	1
mmu-mir-6901	4	0.026262	0.051346	0.964822	1191	2	Shbg	0.030303	0.052022	0.983814	1191	1	Reck	0.030536	0.053362	0.987813	1191	1
Hoxb5	6	0.026275	0.051373	0.964822	1192	1	2010315B03Rik	0.030322	0.052045	0.983814	1192	2	Rbm12	0.030543	0.053371	0.987813	1192	2
Mroh7	6	0.026275	0.051373	0.964822	1193	1	Gbe1	0.030322	0.052045	0.983814	1193	2	Wdr86	0.030675	0.053582	0.987813	1193	1
Plcg2	6	0.026296	0.051409	0.964822	1194	2	Antxrl	0.03035	0.052091	0.983814	1194	1	Cyp2c29	0.030722	0.053666	0.987813	1194	1
Fam13c	6	0.026304	0.051422	0.964822	1195	2	Ccdc160	0.030401	0.05217	0.983814	1195	2	Olfr915	0.030768	0.053733	0.987813	1195	1
Asrgl1	6	0.026313	0.051432	0.964822	1196	2	Tubb2b	0.030443	0.052233	0.983814	1196	1	Npy2r	0.030783	0.053758	0.987813	1196	2
Sgta	6	0.026392	0.051553	0.964822	1197	1	Olfr1231	0.030449	0.052242	0.983814	1197	2	Gltpd1	0.030783	0.053758	0.987813	1197	2
Gm5886	6	0.026393	0.051554	0.964822	1198	2	6820408C15Rik	0.030467	0.052268	0.983814	1198	2	Hoxc11	0.030783	0.053758	0.987813	1198	2
NonTargetingControlGuideForMouse_0066	1	0.026404	0.051577	0.964822	1199	1	Olfr623	0.030486	0.052304	0.983814	1199	2	Cldn20	0.030783	0.053758	0.987813	1199	2
Ogfod2	6	0.026438	0.051635	0.964822	1200	1	Esco2	0.030489	0.052309	0.983814	1200	1	Mgat2	0.030783	0.053758	0.987813	1200	2
mmu-mir-346	4	0.026477	0.051694	0.964822	1201	2	Akap7	0.030536	0.052375	0.983814	1201	1	Trpv1	0.030815	0.053805	0.987813	1201	1
Zkscan17	6	0.026485	0.051706	0.964822	1202	1	Erp29	0.030571	0.052422	0.983814	1202	2	Ict1	0.030861	0.053878	0.987813	1202	2
Mylk4	6	0.026499	0.05173	0.964822	1203	2	Gcnt2	0.030582	0.052436	0.983814	1203	1	NonTargetingControlGuideForMouse_0901	0.03088	0.053905	0.987813	1203	1
mmu-mir-465a	3	0.026509	0.051747	0.964822	1204	1	Rpl13a	0.030599	0.052459	0.983814	1204	2	Pom121l12	0.030908	0.05395	0.987813	1204	1
Eif5a2	6	0.026526	0.051777	0.964822	1205	2	Gkn2	0.030629	0.052503	0.983814	1205	1	Cry1	0.030954	0.05402	0.987813	1205	1
P2ry2	6	0.026532	0.051784	0.964822	1206	1	Gp2	0.030642	0.052526	0.983814	1206	2	Gpx5	0.030997	0.054083	0.987813	1206	2
Gda	6	0.026578	0.051858	0.964822	1207	1	Tas2r125	0.030656	0.052547	0.983814	1207	2	Lmo3	0.031001	0.054087	0.987813	1207	1
Aga	6	0.026579	0.05186	0.964822	1208	2	Pecr	0.030675	0.052577	0.983814	1208	2	Olfr61	0.031047	0.054161	0.987813	1208	1
mmu-mir-7661	4	0.026584	0.051868	0.964822	1209	1	Thrap3	0.030684	0.052585	0.983814	1209	2	Tbc1d22b	0.031093	0.054243	0.987813	1209	1
Cd55	6	0.026677	0.05201	0.964822	1210	2	Fbxw10	0.03076	0.052712	0.984016	1210	2	Olfr402	0.03111	0.05427	0.987813	1210	2
Foxj3	6	0.026726	0.052087	0.964822	1211	2	Olfr166	0.030815	0.052796	0.984016	1211	1	Fndc3c1	0.03114	0.054313	0.987813	1211	1
Edn1	6	0.026811	0.052214	0.964822	1212	2	Trmt1	0.030835	0.052826	0.984016	1212	2	Gsta4	0.031186	0.054374	0.987813	1212	1
Bcl7a	6	0.026837	0.05225	0.964822	1213	2	Gabrg2	0.030861	0.052868	0.984016	1213	1	Zmat4	0.031201	0.054394	0.987813	1213	2
Gm1661	6	0.026905	0.052353	0.964822	1214	1	Tcstv3	0.030908	0.052942	0.984016	1214	1	Ppme1	0.031201	0.054394	0.987813	1214	2
Tceb1	6	0.026917	0.052371	0.964822	1215	2	Srrm2	0.030911	0.052951	0.984016	1215	2	Olfr1437	0.031201	0.054394	0.987813	1215	2
Nadk	6	0.026944	0.052408	0.964822	1216	2	A930009A15Rik	0.030954	0.053018	0.984016	1216	1	Rassf6	0.031233	0.054448	0.987813	1216	1
Clic3	6	0.026951	0.052418	0.964822	1217	1	Nell1	0.030982	0.053054	0.984016	1217	2	Aqp11	0.031279	0.054516	0.987813	1217	1
Ccl9	6	0.026953	0.052424	0.964822	1218	2	Napsa	0.031001	0.053079	0.984016	1218	1	NonTargetingControlGuideForMouse_0563	0.031301	0.05455	0.987813	1218	1
Zdhhc19	6	0.026998	0.052489	0.964822	1219	1	Vmn1r212	0.031006	0.053088	0.984016	1219	2	Rfx4	0.031358	0.054642	0.987813	1219	2
Htr1d	6	0.027002	0.052496	0.964822	1220	2	Vangl2	0.031047	0.053152	0.984016	1220	1	Calb2	0.031377	0.054672	0.987813	1220	2
NonTargetingControlGuideForMouse_0599	1	0.027009	0.052506	0.964822	1221	1	Endov	0.031093	0.053236	0.984016	1221	1	Egr2	0.031453	0.054774	0.987813	1221	2
Olfr1463	6	0.027045	0.052555	0.964822	1222	1	Klra9	0.031106	0.053251	0.984016	1222	1	Spcs1	0.03152	0.054875	0.987813	1222	2
Rel	6	0.02706	0.052582	0.964822	1223	2	Unc80	0.031177	0.053358	0.984016	1223	2	Fhdc1	0.03152	0.054875	0.987813	1223	2
Abhd15	6	0.027078	0.052608	0.964822	1224	2	Fam69b	0.031186	0.053372	0.984016	1224	1	Ddx58	0.031535	0.054892	0.987813	1224	1
Aspdh	6	0.027091	0.052628	0.964822	1225	1	mmu-mir-1191	0.031188	0.053374	0.984016	1225	1	Tbc1d10b	0.031535	0.054892	0.987813	1225	1
Rem2	6	0.027114	0.052663	0.964822	1226	2	Serpinb3d	0.031225	0.053436	0.984016	1226	2	Kif3b	0.031535	0.054892	0.987813	1226	1
Maea	6	0.027141	0.052706	0.964822	1227	2	Capn11	0.031233	0.053452	0.984016	1227	1	Ranbp2	0.031535	0.054892	0.987813	1227	1
Mrpl40	6	0.027184	0.05276	0.964822	1228	1	Pnma3	0.03132	0.053583	0.984016	1228	2	Ndufa10	0.031535	0.054892	0.987813	1228	1
NonTargetingControlGuideForMouse_0543	1	0.027215	0.052812	0.964822	1229	1	Mfsd4	0.031326	0.053593	0.984016	1229	1	Adam9	0.031535	0.054892	0.987813	1229	1
Mylk2	6	0.027231	0.052835	0.964822	1230	2	Idh1	0.031367	0.053663	0.984016	1230	2	Stard4	0.031535	0.054892	0.987813	1230	1
Fshb	6	0.02724	0.05285	0.964822	1231	2	Apobec3	0.031372	0.053671	0.984016	1231	1	Srp19	0.031535	0.054892	0.987813	1231	1
Fgfr1op2	6	0.027278	0.052905	0.964822	1232	1	Nmur2	0.031419	0.053737	0.984016	1232	1	Tnfrsf14	0.031635	0.055054	0.987813	1232	2
NonTargetingControlGuideForMouse_0861	1	0.027287	0.052917	0.964822	1233	1	Sema4f	0.031453	0.053792	0.984016	1233	2	Cd2ap	0.031673	0.055105	0.987813	1233	2
Edem2	6	0.027371	0.053047	0.964822	1234	1	Sult2a3	0.031453	0.053792	0.984016	1234	2	Dram2	0.031683	0.055122	0.987813	1234	2
Lrrtm4	6	0.027401	0.05309	0.964822	1235	2	Mppe1	0.031453	0.053792	0.984016	1235	2	Cxcr6	0.031711	0.055165	0.987813	1235	2
Nit2	6	0.027491	0.053221	0.964822	1236	2	Fbxo22	0.031453	0.053792	0.984016	1236	2	Pfkfb2	0.031769	0.055247	0.987813	1236	2
Oas1e	6	0.027509	0.053243	0.964822	1237	2	Map2k3	0.031488	0.05385	0.984016	1237	1	H2-T23	0.03179	0.055288	0.987813	1237	1
Clps	6	0.027511	0.053245	0.964822	1238	1	NonTargetingControlGuideForMouse_0340	0.031508	0.05388	0.984016	1238	1	Ranbp3l	0.031826	0.055345	0.987813	1238	2
Itprip	6	0.027545	0.053296	0.964822	1239	2	Htr2a	0.031539	0.053919	0.984016	1239	2	Olfr206	0.031837	0.055364	0.987813	1239	1
Myl6	6	0.027557	0.053316	0.964822	1240	2	Tm7sf2	0.031581	0.053988	0.984016	1240	1	Serpinb13	0.031883	0.055433	0.987813	1240	1
Ttll10	6	0.027591	0.053365	0.964822	1241	2	Olfr782	0.031581	0.053988	0.984016	1241	1	Ccdc144b	0.031961	0.055554	0.987813	1241	2
N28178	6	0.027604	0.053384	0.964822	1242	1	Sprr2k	0.031702	0.054178	0.984507	1242	2	E2f8	0.031976	0.055579	0.987813	1242	2
Sell	6	0.027609	0.053391	0.964822	1243	2	Mettl9	0.031744	0.054231	0.984507	1243	1	NonTargetingControlGuideForMouse_0831	0.031977	0.055582	0.987813	1243	1
Msantd1	6	0.027697	0.053519	0.964822	1244	1	Vmn1r222	0.031759	0.054255	0.984507	1244	2	Cep164	0.032019	0.055639	0.987813	1244	2
Ndst3	6	0.02779	0.053664	0.964822	1245	1	Zfp592	0.031769	0.054271	0.984507	1245	2	Zfp874a	0.032022	0.055645	0.987813	1245	1
Mettl9	6	0.027837	0.053733	0.964822	1246	1	Mdfic	0.031778	0.054286	0.984507	1246	2	Qtrt1	0.032047	0.055694	0.987813	1246	2
mmu-mir-466b-1	2	0.027873	0.053788	0.964822	1247	1	Sgms2	0.03179	0.054311	0.984507	1247	1	Olfr1323	0.032069	0.055728	0.987813	1247	1
Mkl1	6	0.027883	0.053805	0.964822	1248	1	Cyp4a10	0.031837	0.054391	0.984507	1248	1	Comtd1	0.032115	0.055797	0.987813	1248	2
Pecr	6	0.02793	0.053874	0.964822	1249	1	Tomm34	0.031846	0.054403	0.984507	1249	2	Agtr1b	0.032185	0.055902	0.987813	1249	1
Zfp12	6	0.027934	0.05388	0.964822	1250	2	Trim71	0.031976	0.054606	0.984507	1250	1	Zfp704	0.032185	0.055902	0.987813	1250	1
Krt35	6	0.027962	0.053925	0.964822	1251	2	Sh3bp1	0.032028	0.054689	0.984507	1251	2	Gm15881	0.032185	0.055902	0.987813	1251	1
4930444G20Rik	6	0.027977	0.053948	0.964822	1252	1	2310002L09Rik	0.032069	0.054764	0.984507	1252	1	Creb3l3	0.032211	0.055942	0.987813	1252	2
mmu-mir-218-1	4	0.027986	0.053963	0.964822	1253	1	Anxa3	0.032115	0.054833	0.984507	1253	1	mmu-mir-7210	0.032244	0.055986	0.987813	1253	1
Tcf21	6	0.027998	0.053984	0.964822	1254	2	Arrdc4	0.032162	0.054898	0.984507	1254	1	Fam20a	0.032301	0.056073	0.987813	1254	1
Wdr34	6	0.028016	0.054009	0.964822	1255	2	Olfr734	0.032254	0.055046	0.984507	1255	1	4931414P19Rik	0.032327	0.056116	0.987813	1255	2
Adam39	6	0.028023	0.054016	0.964822	1256	1	Ostm1	0.032347	0.055206	0.984507	1256	1	mmu-mir-6914	0.032337	0.056131	0.987813	1256	1
Rnf34	6	0.028116	0.054154	0.964822	1257	1	Ccdc91	0.032394	0.055272	0.984507	1257	1	Esp6	0.032347	0.056146	0.987813	1257	1
Cd44	6	0.028162	0.054223	0.964822	1258	2	Dok6	0.032424	0.055317	0.984507	1258	2	Tab1	0.032385	0.056198	0.987813	1258	2
Gm7694	6	0.028171	0.054242	0.964822	1259	2	Rhbdd2	0.03244	0.055348	0.984507	1259	1	mmu-mir-8092	0.032399	0.056222	0.987813	1259	1
Ttc33	6	0.028186	0.054267	0.964822	1260	1	Heatr6	0.032482	0.05542	0.984507	1260	2	Mylip	0.03253	0.05643	0.987813	1260	2
1700054O13Rik	6	0.028186	0.054267	0.964822	1261	1	Gm4787	0.032486	0.055432	0.984507	1261	1	Klf1	0.032549	0.056458	0.987813	1261	2
Tmem204	6	0.028256	0.054372	0.964822	1262	1	Ccdc102a	0.032533	0.055502	0.984507	1262	1	Olfr1505	0.032559	0.056479	0.987813	1262	2
Cyp1a2	6	0.028262	0.05438	0.964822	1263	2	Mtap	0.032579	0.055579	0.984507	1263	1	4933406M09Rik	0.032607	0.056553	0.987813	1263	2
Acot1	6	0.028298	0.05444	0.964822	1264	2	Olfr399	0.032598	0.055618	0.984507	1264	2	Tead4	0.032714	0.056731	0.987813	1264	2
mmu-mir-1901	4	0.028373	0.054553	0.964822	1265	2	Spag8	0.032607	0.055631	0.984507	1265	2	3110021N24Rik	0.032792	0.056855	0.987813	1265	2
2010015L04Rik	6	0.028385	0.054568	0.964822	1266	2	Nkx6-2	0.032617	0.055642	0.984507	1266	2	Cetn2	0.03286	0.056953	0.987813	1266	2
Ablim1	6	0.028396	0.054589	0.964822	1267	1	Stk17b	0.032626	0.055656	0.984507	1267	1	NonTargetingControlGuideForMouse_0748	0.033011	0.057201	0.987813	1267	1
Ccr3	6	0.028417	0.054621	0.964822	1268	2	Fbxl21	0.032672	0.055738	0.984507	1268	1	Fam19a5	0.03303	0.057227	0.987813	1268	2
Arhgef25	6	0.028426	0.054634	0.964822	1269	2	Gm4567	0.032758	0.055887	0.984507	1269	1	Vmn2r120	0.03303	0.057227	0.987813	1269	2
Tulp2	6	0.028442	0.054664	0.964822	1270	1	Mllt6	0.032765	0.055899	0.984507	1270	1	Olfr773	0.03303	0.057227	0.987813	1270	2
Neb	6	0.028444	0.054668	0.964822	1271	2	Scrt1	0.032811	0.055971	0.984507	1271	1	Mettl25	0.03303	0.057227	0.987813	1271	2
Ilf3	6	0.028463	0.0547	0.964822	1272	2	Rybp	0.032858	0.056041	0.984507	1272	1	Gm20865	0.033197	0.057496	0.987813	1272	1
BC068157	6	0.028489	0.054743	0.964822	1273	1	NonTargetingControlGuideForMouse_0066	0.032923	0.056146	0.984507	1273	1	Fam81a	0.033205	0.057506	0.987813	1273	1
Prmt2	6	0.02849	0.054743	0.964822	1274	2	Wnt16	0.03295	0.056191	0.984507	1274	1	Rarg	0.033205	0.057506	0.987813	1274	1
Hspb8	6	0.028535	0.054817	0.964822	1275	1	Mthfs	0.032957	0.056203	0.984507	1275	1	Acoxl	0.033205	0.057506	0.987813	1275	1
mmu-mir-7219	4	0.028569	0.05487	0.964822	1276	2	Nfkb2	0.033043	0.056321	0.984507	1276	1	Aqr	0.033205	0.057506	0.987813	1276	1
Ocln	6	0.028573	0.054876	0.964822	1277	2	Zfp382	0.033074	0.05637	0.984507	1277	2	Olfr474	0.033205	0.057506	0.987813	1277	1
Cd93	6	0.028582	0.054887	0.964822	1278	2	Dscc1	0.033074	0.05637	0.984507	1278	2	Dcp1b	0.033205	0.057506	0.987813	1278	1
Gpr126	6	0.028629	0.054946	0.964822	1279	1	Olfr1013	0.033074	0.05637	0.984507	1279	2	Cep41	0.033205	0.057506	0.987813	1279	1
mmu-mir-467d	1	0.028638	0.054961	0.964822	1280	1	Tcl1b1	0.033074	0.05637	0.984507	1280	2	Coq9	0.033205	0.057506	0.987813	1280	1
Ddx58	6	0.028673	0.055017	0.964822	1281	2	Dnajc13	0.033074	0.05637	0.984507	1281	2	Aaed1	0.033205	0.057506	0.987813	1281	1
Olfr918	6	0.028675	0.055021	0.964822	1282	2	Gtpbp10	0.033074	0.05637	0.984507	1282	2	Olfr1181	0.033205	0.057506	0.987813	1282	1
Sgpp2	6	0.028683	0.055032	0.964822	1283	2	Dram1	0.033074	0.05637	0.984507	1283	2	Ankrd61	0.033205	0.057506	0.987813	1283	1
Egfr	6	0.028722	0.05509	0.964822	1284	2	Prim2	0.033074	0.05637	0.984507	1284	2	Gpr15	0.033205	0.057506	0.987813	1284	1
BC117090	6	0.028784	0.055185	0.964822	1285	2	Olfr1234	0.033074	0.05637	0.984507	1285	2	Cdc26	0.033205	0.057506	0.987813	1285	1
mmu-mir-3971	4	0.028795	0.055204	0.964822	1286	1	Krtap24-1	0.033074	0.05637	0.984507	1286	2	Fnd3c2	0.033205	0.057506	0.987813	1286	1
Tmem256	6	0.028811	0.055231	0.964822	1287	2	Pou5f2	0.033074	0.05637	0.984507	1287	2	Ppp6c	0.033205	0.057506	0.987813	1287	1
Wapal	6	0.028815	0.055237	0.964822	1288	1	Avpi1	0.033074	0.05637	0.984507	1288	2	Apobec4	0.033205	0.057506	0.987813	1288	1
Defb34	6	0.02882	0.05525	0.964822	1289	2	Olfr825	0.033074	0.05637	0.984507	1289	2	Olfr31	0.033205	0.057506	0.987813	1289	1
NonTargetingControlGuideForMouse_0134	1	0.028829	0.055262	0.964822	1290	1	Wls	0.033074	0.05637	0.984507	1290	2	Aif1l	0.033205	0.057506	0.987813	1290	1
Ebp	6	0.02883	0.055262	0.964822	1291	2	Nup210l	0.033074	0.05637	0.984507	1291	2	Fcgr4	0.033205	0.057506	0.987813	1291	1
Eps15	6	0.028861	0.055309	0.964822	1292	1	Serpinb2	0.033074	0.05637	0.984507	1292	2	Ccdc163	0.033205	0.057506	0.987813	1292	1
Tpst2	6	0.028908	0.055386	0.964822	1293	2	Dcstamp	0.033074	0.05637	0.984507	1293	2	Rev3l	0.033205	0.057506	0.987813	1293	1
Olfr1054	6	0.028977	0.05549	0.964822	1294	2	Olfr1462	0.033074	0.05637	0.984507	1294	2	Usp7	0.033205	0.057506	0.987813	1294	1
Frmd5	6	0.029001	0.055522	0.964822	1295	2	Adm2	0.033089	0.056393	0.984507	1295	1	Rpl24	0.033205	0.057506	0.987813	1295	1
1700009P17Rik	6	0.029027	0.055558	0.964822	1296	2	Zfp960	0.033111	0.056429	0.984507	1296	1	Serpina1d	0.033205	0.057506	0.987813	1296	1
Krtap19-9b	6	0.029094	0.055664	0.964822	1297	1	Ly86	0.033136	0.056468	0.984507	1297	1	Rassf1	0.033205	0.057506	0.987813	1297	1
Kcnt2	6	0.02912	0.055701	0.964822	1298	2	Asb7	0.033182	0.056538	0.984507	1298	1	Mpp5	0.033205	0.057506	0.987813	1298	1
Gsdmc4	6	0.029141	0.055734	0.964822	1299	1	C1qtnf1	0.033229	0.056619	0.984507	1299	1	Gpr82	0.033205	0.057506	0.987813	1299	1
Adam3	6	0.029152	0.055753	0.964822	1300	2	Gm10267	0.033275	0.056692	0.984507	1300	1	Vmn1r55	0.03323	0.057545	0.987813	1300	2
Fam122a	6	0.029184	0.055803	0.964822	1301	2	Gm9268	0.03346	0.056974	0.984507	1301	1	Pcdha2	0.03324	0.057556	0.987813	1301	1
Krt33b	6	0.029184	0.055803	0.964822	1302	2	Olfr1276	0.033507	0.057051	0.984507	1302	1	Stox1	0.033299	0.057652	0.987813	1302	2
Fuca2	6	0.029208	0.055837	0.964822	1303	2	Cts8	0.033543	0.057109	0.984507	1303	2	Hhipl1	0.033367	0.057752	0.987813	1303	2
Olfr1131	6	0.02928	0.055956	0.964822	1304	1	Kcnj16	0.033573	0.057161	0.984507	1304	2	NonTargetingControlGuideForMouse_0188	0.03346	0.057903	0.987813	1304	1
Mroh8	6	0.029327	0.056017	0.964822	1305	1	Hspa1b	0.0336	0.057205	0.984507	1305	1	Atxn7	0.03346	0.057904	0.987813	1305	2
Cpsf4	6	0.029373	0.056075	0.964822	1306	1	Magi3	0.033602	0.057211	0.984507	1306	2	Apbb2	0.03346	0.057904	0.987813	1306	2
AI182371	6	0.029435	0.05616	0.964822	1307	2	Enox1	0.033691	0.057351	0.984507	1307	2	E030018B13Rik	0.033494	0.057953	0.987813	1307	2
Ifne	6	0.029466	0.056204	0.964822	1308	1	Zfp874a	0.03373	0.057407	0.984507	1308	2	Fbxw10	0.033563	0.058058	0.987813	1308	2
Rslcan18	6	0.029513	0.056279	0.964822	1309	1	Clec4b1	0.03375	0.057438	0.984507	1309	2	Fam84b	0.033592	0.058105	0.987813	1309	2
Bcl9l	6	0.029606	0.056409	0.964822	1310	1	Tnfsf13b	0.033808	0.057525	0.984507	1310	1	Grik1	0.033602	0.058118	0.987813	1310	2
NonTargetingControlGuideForMouse_0519	1	0.02964	0.056461	0.964822	1311	1	Retnlb	0.033808	0.057525	0.984507	1311	1	Als2cl	0.03371	0.058283	0.987813	1311	2
Cyp2r1	6	0.029644	0.056465	0.964822	1312	2	Mylip	0.033858	0.057601	0.984507	1312	2	Mtx3	0.033809	0.058426	0.987813	1312	2
Asb11	6	0.029652	0.056475	0.964822	1313	1	Ctse	0.033878	0.057627	0.984507	1313	1	mmu-mir-20a	0.033825	0.058447	0.987813	1313	1
Slco1b2	6	0.029672	0.056502	0.964822	1314	2	Gm7257	0.033917	0.057688	0.984507	1314	2	Atraid	0.033848	0.058488	0.987813	1314	2
Vtcn1	6	0.029681	0.056517	0.964822	1315	2	Olfr891	0.033937	0.057723	0.984507	1315	2	Olfr92	0.033878	0.058537	0.987813	1315	2
Eif4a2	6	0.029699	0.056543	0.964822	1316	1	Dhps	0.03397	0.057775	0.984507	1316	1	Msl3	0.033937	0.058641	0.987813	1316	2
Wdr63	6	0.029745	0.056606	0.964822	1317	1	1700001C19Rik	0.034017	0.05785	0.984507	1317	1	Cep104	0.033986	0.058722	0.987813	1317	2
Tgfbr3	6	0.029746	0.056606	0.964822	1318	2	Adck3	0.034063	0.057923	0.984507	1318	1	Olfr798	0.034006	0.05875	0.987813	1318	2
Srp72	6	0.029765	0.056631	0.964822	1319	2	Nlrp4g	0.034095	0.057973	0.984507	1319	2	Dnajc2	0.034017	0.058767	0.987813	1319	1
Galnt12	6	0.029792	0.056668	0.964822	1320	1	Tssk1	0.034154	0.058046	0.984507	1320	2	Serp2	0.034035	0.058792	0.987813	1320	2
mmu-mir-574	4	0.029794	0.05667	0.964822	1321	2	Olfr1416	0.034156	0.05805	0.984507	1321	1	Jakmip2	0.034063	0.058845	0.987813	1321	1
Thrsp	6	0.029825	0.056711	0.964822	1322	2	Rfc5	0.034202	0.05812	0.984507	1322	1	Trim30a	0.034075	0.058857	0.987813	1322	2
Olfr1155	6	0.029838	0.056731	0.964822	1323	1	Ly6g6c	0.034248	0.058193	0.984507	1323	1	Olfr971	0.034109	0.058907	0.987813	1323	2
Myeov2	6	0.029931	0.056871	0.964822	1324	2	Grn	0.034295	0.058266	0.984507	1324	1	NonTargetingControlGuideForMouse_0406	0.034131	0.058934	0.987813	1324	1
Hsp90aa1	6	0.029978	0.056934	0.964822	1325	1	Olfr695	0.034312	0.058287	0.984507	1325	2	Slc14a2	0.034156	0.058968	0.987813	1325	1
Obsl1	6	0.029989	0.056947	0.964822	1326	2	4833427G06Rik	0.034322	0.058307	0.984507	1326	2	D14Abb1e	0.034213	0.059052	0.987813	1326	2
N4bp3	6	0.030017	0.056999	0.964822	1327	2	Hars	0.034332	0.058325	0.984507	1327	2	Rps5	0.034213	0.059052	0.987813	1327	2
Daglb	6	0.030024	0.057011	0.964822	1328	1	Rilpl2	0.034386	0.058407	0.984507	1328	2	Erp29	0.034295	0.059176	0.987813	1328	2
Snurf	6	0.030026	0.057013	0.964822	1329	2	Dusp18	0.034491	0.058577	0.984507	1329	2	Pcdhb15	0.034312	0.059196	0.987813	1329	2
Prss34	6	0.030054	0.057054	0.964822	1330	2	Tube1	0.034503	0.058599	0.984507	1330	1	Ccdc59	0.034387	0.059319	0.987813	1330	1
Tmco1	6	0.030071	0.057075	0.964822	1331	1	Klk11	0.034503	0.058599	0.984507	1331	1	Rnase10	0.03448	0.059464	0.987813	1331	1
Vmn1r173	6	0.03011	0.057137	0.964822	1332	2	Acp1	0.034503	0.058599	0.984507	1332	1	Il13	0.034501	0.059496	0.987813	1332	2
Vmn1r45	6	0.030117	0.057148	0.964822	1333	1	Csrnp3	0.034503	0.058599	0.984507	1333	1	Vmn1r74	0.034526	0.059543	0.987813	1333	1
Ptprn	6	0.030148	0.057188	0.964822	1334	2	BC048679	0.034503	0.058599	0.984507	1334	1	Arid5b	0.034545	0.059572	0.987813	1334	2
Cts8	6	0.030167	0.057213	0.964822	1335	2	Olfr1006	0.034503	0.058599	0.984507	1335	1	Tas2r144	0.03458	0.059621	0.987813	1335	2
Vmn2r96	6	0.030176	0.057226	0.964822	1336	2	Thrb	0.034503	0.058599	0.984507	1336	1	Klk1b3	0.034619	0.059684	0.987813	1336	1
mmu-mir-293	4	0.030183	0.057234	0.964822	1337	2	Gfra3	0.03451	0.058612	0.984507	1337	2	Gtsf1	0.034659	0.059755	0.987813	1337	2
Aqp11	6	0.030257	0.05735	0.964822	1338	1	Gli1	0.03453	0.058652	0.984507	1338	2	Fbxl4	0.034709	0.059829	0.987813	1338	2
Ogn	6	0.030303	0.057413	0.964822	1339	1	Fam71e1	0.03454	0.058668	0.984507	1339	2	Mesp2	0.034712	0.059833	0.987813	1339	1
Cldn12	6	0.03035	0.05748	0.964822	1340	1	Susd4	0.03465	0.058842	0.984507	1340	2	Cabp5	0.034758	0.05991	0.987813	1340	1
Slc10a4	6	0.030354	0.05749	0.964822	1341	2	Olfr1038-ps	0.034758	0.059023	0.984507	1341	1	Fads3	0.034851	0.060057	0.987813	1341	1
Gabarapl2	6	0.030373	0.057523	0.964822	1342	2	Hoxb5	0.034804	0.059099	0.984507	1342	1	NonTargetingControlGuideForMouse_0684	0.034887	0.060111	0.987813	1342	1
Olfr429	6	0.030396	0.057556	0.964822	1343	2	Tnc	0.034824	0.059138	0.984507	1343	2	Prl2c2	0.034895	0.060121	0.987813	1343	1
Pcolce	6	0.030401	0.057562	0.964822	1344	2	Pappa	0.034851	0.059177	0.984507	1344	1	Rspo3	0.034897	0.060123	0.987813	1344	1
Deaf1	6	0.030443	0.057622	0.964822	1345	1	Phf12	0.034879	0.059221	0.984507	1345	2	Ubl5	0.034908	0.060138	0.987813	1345	2
Cystm1	6	0.030458	0.057644	0.964822	1346	2	Vmn1r60	0.034943	0.05932	0.984507	1346	1	Maoa	0.034908	0.060138	0.987813	1346	2
Ptpn5	6	0.030489	0.057704	0.964822	1347	1	Gm9112	0.034958	0.05934	0.984507	1347	2	Adamtsl5	0.034908	0.060138	0.987813	1347	2
Zfp663	6	0.030505	0.057732	0.964822	1348	2	Arap3	0.034989	0.059391	0.984507	1348	1	Apoa5	0.034908	0.060138	0.987813	1348	2
Mrfap1	6	0.030514	0.057742	0.964822	1349	2	mmu-let-7j	0.035033	0.059456	0.984507	1349	1	Trim39	0.034908	0.060138	0.987813	1349	2
Pfn4	6	0.030536	0.057777	0.964822	1350	1	Dap3	0.035036	0.05946	0.984507	1350	1	Kcnmb4	0.034908	0.060138	0.987813	1350	2
Enox1	6	0.030623	0.057897	0.964822	1351	2	Ptk2	0.035038	0.059463	0.984507	1351	2	Wdr65	0.034908	0.060138	0.987813	1351	2
Ppp1r16a	6	0.030629	0.057907	0.964822	1352	1	Kif24	0.035068	0.059509	0.984507	1352	2	Lrif1	0.034908	0.060138	0.987813	1352	2
mmu-mir-6410	4	0.030629	0.057908	0.964822	1353	1	Rufy3	0.035128	0.059609	0.984507	1353	1	Rpl29	0.034908	0.060138	0.987813	1353	2
Shbg	6	0.030675	0.057984	0.964822	1354	2	Cabp7	0.035138	0.059624	0.984507	1354	2	Cdyl	0.034943	0.060194	0.987813	1354	1
Apobec3	6	0.030722	0.058062	0.964822	1355	1	Ccdc25	0.035168	0.059674	0.984507	1355	2	mmu-mir-7240	0.034986	0.060261	0.987813	1355	1
Lrrc59	6	0.030741	0.058083	0.964822	1356	2	mmu-mir-465a	0.035174	0.059682	0.984507	1356	1	Adam39	0.034989	0.060265	0.987813	1356	1
Mlec	6	0.030768	0.05813	0.964822	1357	1	Cdyl	0.035175	0.059685	0.984507	1357	1	Armcx6	0.035128	0.060496	0.987813	1357	1
Eif2ak4	6	0.030815	0.05819	0.964822	1358	1	Osbpl11	0.035208	0.05974	0.984507	1358	2	Map6	0.035148	0.060528	0.987813	1358	2
Mfsd7c	6	0.030826	0.058208	0.964822	1359	2	Lgmn	0.035221	0.059755	0.984507	1359	1	BC147527	0.035175	0.060566	0.987813	1359	1
Rhbdl3	6	0.030861	0.058258	0.964822	1360	1	mmu-mir-5132	0.03525	0.059797	0.984507	1360	1	Golgb1	0.035221	0.06064	0.987813	1360	1
Rb1	6	0.030883	0.05829	0.964822	1361	2	Vmn2r72	0.035267	0.059821	0.984507	1361	1	Ncapg2	0.035267	0.060707	0.987813	1361	1
Gm7157	6	0.030908	0.058327	0.964822	1362	1	Mmp21	0.035313	0.059894	0.984507	1362	1	Chmp1b	0.035313	0.060772	0.987813	1362	1
Abhd17a	6	0.030954	0.058392	0.964822	1363	2	1700007K13Rik	0.035318	0.0599	0.984507	1363	2	Olfr807	0.03536	0.060838	0.987813	1363	1
Ptprr	6	0.031001	0.058455	0.964822	1364	1	Esp6	0.035349	0.059947	0.984507	1364	2	Qars	0.035369	0.060856	0.987813	1364	2
St3gal6	6	0.031016	0.058479	0.964822	1365	2	Insl3	0.035369	0.059978	0.984507	1365	2	Manf	0.035406	0.060915	0.987813	1365	1
Adam25	6	0.031047	0.058525	0.964822	1366	1	Rfc1	0.035379	0.059992	0.984507	1366	2	Lck	0.035449	0.060981	0.987813	1366	2
Tex36	6	0.031072	0.058565	0.964822	1367	2	Arhgef39	0.035399	0.060022	0.984507	1367	2	Pik3ca	0.035452	0.060985	0.987813	1367	1
Bend6	6	0.031072	0.058565	0.964822	1368	2	Npy1r	0.035406	0.060037	0.984507	1368	1	Vps52	0.035499	0.061051	0.987813	1368	1
Olfr970	6	0.031093	0.058599	0.964822	1369	1	Stpg2	0.035419	0.060059	0.984507	1369	2	Vmn2r85	0.035539	0.061098	0.987813	1369	2
Dync1li2	6	0.031129	0.058646	0.964822	1370	2	Pabpc1l	0.035469	0.060134	0.984507	1370	2	Mzt2	0.035545	0.061109	0.987813	1370	1
Fpgs	6	0.031233	0.058802	0.964822	1371	1	Ing5	0.035522	0.060204	0.984507	1371	1	Phykpl	0.035559	0.061129	0.987813	1371	2
Otol1	6	0.031234	0.058803	0.964822	1372	2	Ptcra	0.035522	0.060204	0.984507	1372	1	Pramef25	0.03563	0.061241	0.987813	1372	2
Lpin3	6	0.031279	0.058868	0.964822	1373	2	Abhd12	0.035564	0.060264	0.984507	1373	2	Hsd3b1	0.035637	0.061249	0.987813	1373	1
mmu-mir-27b	4	0.031281	0.058871	0.964822	1374	1	Rhobtb1	0.035564	0.060264	0.984507	1374	2	Fundc2	0.035821	0.061515	0.987813	1374	2
Ttc30a1	6	0.03132	0.058922	0.964822	1375	2	Gpr68	0.035564	0.060264	0.984507	1375	2	Ttll5	0.035823	0.061518	0.987813	1375	1
Ufl1	6	0.031326	0.058932	0.964822	1376	2	Prdm11	0.035564	0.060264	0.984507	1376	2	Syne1	0.035831	0.061536	0.987813	1376	2
Heatr6	6	0.031339	0.058945	0.964822	1377	2	Adh7	0.035591	0.060312	0.984507	1377	1	Mill2	0.035851	0.061561	0.987813	1377	2
Elf2	6	0.031339	0.058945	0.964822	1378	2	Zfp354b	0.03561	0.060344	0.984507	1378	2	Map3k3	0.035869	0.061587	0.987813	1378	1
mmu-mir-7224	4	0.031406	0.05905	0.964822	1379	1	Vldlr	0.03563	0.060375	0.984507	1379	2	Fcgrt	0.035962	0.061731	0.987813	1379	2
Jak1	6	0.031425	0.059076	0.964822	1380	2	Pglyrp4	0.035637	0.060381	0.984507	1380	1	Muc13	0.036084	0.061897	0.987813	1380	2
Tmem170	6	0.031444	0.059103	0.964822	1381	2	Bach2	0.035684	0.060453	0.984507	1381	1	Dnajc19	0.036094	0.06191	0.987813	1381	2
Xaf1	6	0.031512	0.059206	0.964822	1382	2	Raet1b	0.035711	0.060496	0.984507	1382	1	Wdfy2	0.036139	0.061969	0.987813	1382	2
Nup98	6	0.031512	0.059206	0.964822	1383	1	Tmem218	0.03573	0.060521	0.984507	1383	1	Olfr1204	0.036139	0.061969	0.987813	1383	2
Adcy8	6	0.031512	0.059206	0.964822	1384	1	Ly96	0.03573	0.060522	0.984507	1384	2	Paip2b	0.036225	0.062121	0.987813	1384	2
Nacc1	6	0.031512	0.059206	0.964822	1385	1	Vmn1r30	0.035771	0.060574	0.984507	1385	2	Clec16a	0.036285	0.062223	0.987813	1385	1
Nfam1	6	0.031512	0.059206	0.964822	1386	1	Dera	0.035791	0.060605	0.984507	1386	2	Mmd	0.036285	0.062223	0.987813	1386	1
Zer1	6	0.031512	0.059206	0.964822	1387	1	Wdr38	0.035823	0.060652	0.984507	1387	1	Mettl13	0.036285	0.062223	0.987813	1387	1
Map3k6	6	0.031512	0.059206	0.964822	1388	2	Fam13a	0.035869	0.060726	0.984507	1388	1	Snap29	0.036285	0.062223	0.987813	1388	1
Mc2r	6	0.031568	0.059292	0.964827	1389	2	Apol7e	0.035941	0.060842	0.984507	1389	1	S1pr3	0.036285	0.062223	0.987813	1389	1
Olfr1420	6	0.031587	0.059321	0.964827	1390	2	Foxa3	0.035961	0.060876	0.984507	1390	1	Tut1	0.036285	0.062223	0.987813	1390	1
Cntln	6	0.031597	0.059334	0.964827	1391	2	Slirp	0.036008	0.060948	0.984507	1391	1	Nupl1	0.036285	0.062223	0.987813	1391	1
Smpdl3b	6	0.031697	0.059484	0.965079	1392	2	Cep68	0.036028	0.060982	0.984507	1392	2	Ubd	0.036285	0.062223	0.987813	1392	2
1700034J05Rik	6	0.031731	0.059528	0.965079	1393	2	Cabp5	0.036028	0.060982	0.984507	1393	2	Atg14	0.036285	0.062223	0.987813	1393	1
Fam132a	6	0.031744	0.059549	0.965079	1394	1	Cerk	0.036028	0.060982	0.984507	1394	2	Gm13826	0.036285	0.062223	0.987813	1394	1
Ccl20	6	0.031778	0.0596	0.965079	1395	2	Rnase6	0.036028	0.060982	0.984507	1395	2	Hal	0.036285	0.062223	0.987813	1395	1
Lmf2	6	0.03179	0.059621	0.965079	1396	1	S100b	0.036054	0.061015	0.984507	1396	1	Hnrnpk	0.036285	0.062223	0.987813	1396	1
Cd200r4	6	0.031883	0.05976	0.965079	1397	1	mmu-mir-130b	0.036054	0.061016	0.984507	1397	1	Ankib1	0.036286	0.062224	0.987813	1397	2
Vmn1r46	6	0.031884	0.059762	0.965079	1398	2	mmu-mir-6420	0.036054	0.061016	0.984507	1398	1	Fcamr	0.036337	0.062291	0.987813	1398	2
Dnajb8	6	0.031913	0.059804	0.965079	1399	2	mmu-mir-764	0.036054	0.061016	0.984507	1399	1	Atp10a	0.036423	0.062427	0.987813	1399	2
mmu-mir-1953	4	0.031921	0.059815	0.965079	1400	2	Cnot6l	0.036146	0.061147	0.984507	1400	1	Clca6	0.036423	0.062427	0.987813	1400	2
BC147527	6	0.031929	0.059829	0.965079	1401	1	Olfr1389	0.036193	0.06124	0.984507	1401	1	NonTargetingControlGuideForMouse_0077	0.0365	0.062541	0.987813	1401	1
Olfr68	6	0.031976	0.059902	0.965079	1402	1	Creb3l2	0.036215	0.06128	0.984507	1402	2	Olfr777	0.03656	0.062637	0.987813	1402	2
Svs6	6	0.03199	0.059927	0.965079	1403	2	Msantd1	0.036285	0.061395	0.984507	1403	1	Pml	0.036571	0.062654	0.987813	1403	2
Oprd1	6	0.031999	0.059942	0.965079	1404	2	Plcz1	0.036296	0.061414	0.984507	1404	2	Gm5938	0.036581	0.062669	0.987813	1404	2
Hbb-bt	3	0.032003	0.059947	0.965079	1405	1	Ripk1	0.036347	0.061485	0.984507	1405	2	Gm9268	0.036632	0.06275	0.987813	1405	2
Itih4	6	0.032115	0.06011	0.966114	1406	1	Grlf1	0.036378	0.061537	0.984507	1406	1	Lsm12	0.036655	0.062781	0.987813	1406	1
Zfp26	6	0.032124	0.060124	0.966114	1407	2	Atl1	0.036424	0.061614	0.984507	1407	1	Gpr174	0.036682	0.06282	0.987813	1407	2
C78339	6	0.032162	0.060173	0.966114	1408	1	Olfr429	0.03647	0.061679	0.984507	1408	1	Ly6g6c	0.036701	0.062847	0.987813	1408	1
Sepp1	6	0.032192	0.060221	0.966114	1409	2	Ccdc114	0.036516	0.061754	0.984507	1409	1	Shoc2	0.036815	0.063024	0.987813	1409	2
Olfr412	6	0.032208	0.060247	0.966114	1410	1	Trmt2b	0.03652	0.061762	0.984507	1410	2	Hoxb5	0.03684	0.063065	0.987813	1410	1
Eif4g1	6	0.03225	0.060305	0.966114	1411	2	1700123O20Rik	0.03655	0.061802	0.984507	1411	2	Pla1a	0.036866	0.063097	0.987813	1411	2
Fbxw4	6	0.032254	0.06031	0.966114	1412	1	Hsd3b5	0.036563	0.061818	0.984507	1412	1	Hs2st1	0.036897	0.063149	0.987813	1412	2
Igfbp3	6	0.032298	0.060372	0.966419	1413	2	Golga3	0.036591	0.061858	0.984507	1413	2	Tm7sf2	0.036917	0.063176	0.987813	1413	2
Lrrc71	6	0.032347	0.060452	0.966564	1414	1	Trim75	0.036601	0.061875	0.984507	1414	2	L1td1	0.036927	0.063191	0.987813	1414	2
Olfr594	6	0.032356	0.060466	0.966564	1415	2	Ext2	0.036609	0.06189	0.984507	1415	1	Pnma3	0.036933	0.063198	0.987813	1415	2
Akap7	6	0.03244	0.06059	0.967274	1416	1	mmu-mir-99b	0.036611	0.061892	0.984507	1416	1	Uhrf1	0.036979	0.063266	0.987813	1416	1
Vmn2r89	6	0.032462	0.060622	0.967274	1417	2	Gkn3	0.036655	0.061961	0.984507	1417	1	Wisp3	0.036989	0.063281	0.987813	1417	2
Kdm6a	6	0.032511	0.060697	0.967274	1418	2	Abca17	0.036748	0.062101	0.984507	1418	1	Gpr34	0.037025	0.063346	0.987813	1418	1
1700001L19Rik	6	0.03252	0.060708	0.967274	1419	2	Olfr206	0.036794	0.062177	0.984507	1419	1	Myl1	0.037071	0.063419	0.987813	1419	2
Mbd2	6	0.032533	0.060725	0.967274	1420	1	Col24a1	0.03684	0.062241	0.984507	1420	1	Hsph1	0.037111	0.063492	0.987813	1420	2
Olfr130	6	0.032579	0.060789	0.967625	1421	1	Rab10	0.036856	0.062268	0.984507	1421	2	Mxd1	0.037117	0.0635	0.987813	1421	1
Ulk3	6	0.032607	0.060832	0.967627	1422	2	Mia2	0.036881	0.062303	0.984507	1422	2	Pnliprp1	0.037121	0.063509	0.987813	1422	2
Tpd52l1	6	0.032672	0.060932	0.968533	1423	1	Olfr1463	0.036886	0.062312	0.984507	1423	1	Olfr63	0.037152	0.063564	0.987813	1423	2
Cbx4	6	0.032718	0.061011	0.969105	1424	1	Ptpn5	0.036933	0.062379	0.984507	1424	1	Krt84	0.037164	0.063582	0.987813	1424	1
Bach2	6	0.032765	0.061071	0.969239	1425	1	Olfr67	0.036979	0.062452	0.984507	1425	1	Phldb2	0.037173	0.063596	0.987813	1425	2
Rest	6	0.032831	0.061168	0.969239	1426	2	Olfr1370	0.037071	0.062604	0.984507	1426	1	Idh1	0.037203	0.063638	0.987813	1426	2
Nckap1l	6	0.032918	0.061297	0.969239	1427	2	mmu-mir-8120	0.037105	0.062662	0.984507	1427	1	Rerg	0.03721	0.06365	0.987813	1427	1
Gphb5	6	0.032947	0.06134	0.969239	1428	2	Pla2g10	0.037116	0.062675	0.984507	1428	2	Eif3f	0.037255	0.063719	0.987813	1428	2
NonTargetingControlGuideForMouse_0322	1	0.032971	0.061372	0.969239	1429	1	Ighmbp2	0.037164	0.062756	0.984507	1429	1	Kdm5a	0.037285	0.063775	0.987813	1429	2
Zfp503	6	0.032996	0.061404	0.969239	1430	2	Ermn	0.037256	0.062888	0.984507	1430	1	NonTargetingControlGuideForMouse_0819	0.037287	0.063778	0.987813	1430	1
mmu-mir-3070a	3	0.033006	0.061421	0.969239	1431	1	Urgcp	0.037275	0.062928	0.984507	1431	2	Adck3	0.037302	0.063813	0.987813	1431	1
Nfib	6	0.033043	0.061467	0.969239	1432	2	Ear11	0.037348	0.063055	0.984507	1432	1	Cdk2ap2	0.037348	0.063889	0.987813	1432	2
Rxrg	6	0.033064	0.061501	0.969239	1433	2	Sar1a	0.037357	0.063066	0.984507	1433	2	Pde4d	0.037388	0.063951	0.987813	1433	2
Mecp2	6	0.033089	0.061535	0.969239	1434	1	Sh3bgrl	0.037388	0.063117	0.984507	1434	2	Aicda	0.037395	0.063964	0.987813	1434	1
Olfr641	6	0.033133	0.061601	0.969239	1435	2	C030046E11Rik	0.037395	0.063127	0.984507	1435	1	BB287469	0.03745	0.064046	0.987813	1435	1
Igf2bp2	6	0.033136	0.061607	0.969239	1436	1	Il19	0.037441	0.063192	0.984507	1436	1	Olfr495	0.037487	0.064098	0.987813	1436	2
Gdap1l1	6	0.033142	0.061617	0.969239	1437	2	Zmym3	0.03746	0.063222	0.984507	1437	2	Cnga4	0.037542	0.064188	0.987813	1437	2
Fam76b	6	0.033229	0.061755	0.969239	1438	1	Cdk5r2	0.03748	0.063252	0.984507	1438	2	Adh1	0.037542	0.064188	0.987813	1438	2
Drg1	6	0.033275	0.061831	0.969239	1439	2	Map2k1	0.037573	0.063408	0.984507	1439	2	Hmox1	0.037542	0.064188	0.987813	1439	2
mmu-mir-6998	4	0.033318	0.061886	0.969239	1440	2	Hcn4	0.037604	0.063458	0.984507	1440	2	Hoxc5	0.037542	0.064188	0.987813	1440	2
Nlrx1	6	0.033318	0.061886	0.969239	1441	2	mmu-mir-3971	0.037754	0.063697	0.984507	1441	1	Myh8	0.037579	0.064245	0.987813	1441	1
Ctsa	6	0.03346	0.062093	0.969239	1442	1	Arhgap12	0.037758	0.0637	0.984507	1442	2	NonTargetingControlGuideForMouse_0386	0.03759	0.064265	0.987813	1442	1
Zhx3	6	0.033553	0.062235	0.969239	1443	1	Elovl2	0.037769	0.063719	0.984507	1443	2	Il1rl1	0.037626	0.064317	0.987813	1443	1
Cacng3	6	0.0336	0.062303	0.969239	1444	1	Gabrr1	0.0378	0.063768	0.984507	1444	2	Vmn1r212	0.037672	0.06438	0.987813	1444	1
Med22	6	0.033661	0.062399	0.969239	1445	2	Pex5l	0.037825	0.063804	0.984507	1445	2	NonTargetingControlGuideForMouse_0579	0.037701	0.064427	0.987813	1445	1
Osbpl2	6	0.033661	0.062399	0.969239	1446	2	Mapk15	0.037851	0.063842	0.984507	1446	2	Nek1	0.037758	0.064521	0.987813	1446	2
Cdkl4	6	0.033661	0.062399	0.969239	1447	2	Gm20877	0.038016	0.064101	0.984507	1447	2	Pkd1	0.037789	0.064571	0.987813	1447	2
Pgr	6	0.033661	0.062399	0.969239	1448	2	Tnr	0.038027	0.064115	0.984507	1448	2	Hnrnpr	0.03781	0.064594	0.987813	1448	2
Svep1	6	0.033661	0.062399	0.969239	1449	2	Hdac8	0.038047	0.06414	0.984507	1449	2	Brf1	0.037836	0.06463	0.987813	1449	2
Cisd3	6	0.033661	0.062399	0.969239	1450	2	Olfr1328	0.038151	0.064308	0.984507	1450	2	Nfkb2	0.037857	0.064664	0.987813	1450	1
Hoxc11	6	0.033661	0.062399	0.969239	1451	2	Orm2	0.038161	0.064321	0.984507	1451	2	Wfdc6a	0.037892	0.064713	0.987813	1451	2
Pgk1	6	0.033661	0.062399	0.969239	1452	2	Ube2r2	0.038172	0.064331	0.984507	1452	2	Foxr2	0.037903	0.064731	0.987813	1452	1
Slu7	6	0.033661	0.062399	0.969239	1453	2	Rad50	0.03826	0.064467	0.984507	1453	2	Rpl41	0.03794	0.064792	0.987813	1453	1
Rpsa	6	0.033661	0.062399	0.969239	1454	2	Adipoq	0.038286	0.064503	0.984507	1454	2	Pdcd11	0.037949	0.064808	0.987813	1454	1
Rab7l1	6	0.033661	0.062399	0.969239	1455	2	Ociad2	0.038306	0.064533	0.984507	1455	2	Acsm3	0.037954	0.064814	0.987813	1455	2
Stk31	6	0.033739	0.062506	0.969239	1456	1	Klra22	0.038496	0.06483	0.984507	1456	1	Myo5b	0.037995	0.064874	0.987813	1456	1
Nox1	6	0.033785	0.062572	0.969239	1457	1	NonTargetingControlGuideForMouse_0045	0.03852	0.064868	0.984507	1457	1	Olfr544	0.038016	0.064913	0.987813	1457	2
mmu-mir-546	4	0.033803	0.062595	0.969239	1458	2	Lypd6b	0.038628	0.065035	0.984507	1458	2	Chac1	0.038078	0.064998	0.987813	1458	2
Atl1	6	0.033831	0.062634	0.969239	1459	1	Olfr1183	0.038649	0.065055	0.984507	1459	2	Raver1	0.03812	0.065066	0.987813	1459	2
Fads3	6	0.033878	0.062705	0.969239	1460	1	Nipal4	0.03868	0.065102	0.984507	1460	2	Telo2	0.03814	0.065095	0.987813	1460	2
Slc9a4	6	0.033924	0.062782	0.969239	1461	1	Glis2	0.038711	0.065158	0.984507	1461	1	Inpp5j	0.038161	0.065129	0.987813	1461	2
Spz1	6	0.034016	0.062925	0.969239	1462	2	Cc2d1b	0.038711	0.065158	0.984507	1462	1	Gcnt2	0.03818	0.065156	0.987813	1462	2
Nfatc2	6	0.034017	0.062927	0.969239	1463	1	Olfr340	0.038711	0.065158	0.984507	1463	1	Tcstv3	0.038226	0.065216	0.987813	1463	1
Champ1	6	0.034025	0.062941	0.969239	1464	2	Pgam1	0.038711	0.065158	0.984507	1464	1	Adam12	0.038272	0.06528	0.987813	1464	2
Aco2	6	0.034035	0.062953	0.969239	1465	2	Slc9a1	0.038711	0.065158	0.984507	1465	1	1110058L19Rik	0.038318	0.065361	0.987813	1465	1
Olfr1145	6	0.034063	0.062997	0.969239	1466	1	Olfr729	0.038711	0.065158	0.984507	1466	1	Tcstv1	0.038365	0.065431	0.987813	1466	1
Serpini1	6	0.034164	0.06313	0.969239	1467	2	Ctnna3	0.038711	0.065158	0.984507	1467	1	Rrm2	0.038374	0.065444	0.987813	1467	2
NonTargetingControlGuideForMouse_0915	1	0.034187	0.063164	0.969239	1468	1	Gpx7	0.038711	0.065158	0.984507	1468	1	Dhx40	0.038374	0.065444	0.987813	1468	2
Mib2	6	0.034202	0.063184	0.969239	1469	1	Bscl2	0.038711	0.065158	0.984507	1469	1	Lrrc46	0.038374	0.065444	0.987813	1469	2
Fert2	6	0.034248	0.063254	0.969239	1470	1	Bpnt1	0.038711	0.065158	0.984507	1470	1	Mrps27	0.038374	0.065444	0.987813	1470	2
R3hcc1	6	0.034295	0.063329	0.969239	1471	2	Gramd1c	0.038711	0.065158	0.984507	1471	1	Qrich2	0.038374	0.065444	0.987813	1471	2
Ivl	6	0.034322	0.063365	0.969239	1472	2	Cep170b	0.038711	0.065158	0.984507	1472	1	Ear5	0.038374	0.065444	0.987813	1472	2
Pin1rt1	6	0.034332	0.06338	0.969239	1473	2	Crlf2	0.038711	0.065158	0.984507	1473	1	Chfr	0.038411	0.065492	0.987813	1473	1
Gm44	6	0.034341	0.063394	0.969239	1474	1	Pomgnt1	0.038711	0.065158	0.984507	1474	1	Ostm1	0.038457	0.065561	0.987813	1474	1
Mavs	6	0.034372	0.063438	0.969239	1475	2	Cmpk1	0.038711	0.065158	0.984507	1475	1	Fbxw16	0.038485	0.065605	0.987813	1475	1
mmu-mir-568	4	0.034383	0.063457	0.969239	1476	1	Guca2b	0.038711	0.065158	0.984507	1476	1	Eme2	0.038503	0.065635	0.987813	1476	2
Pgam5	6	0.034411	0.063503	0.969239	1477	1	Sephs2	0.038711	0.065158	0.984507	1477	1	NonTargetingControlGuideForMouse_0889	0.038504	0.065635	0.987813	1477	1
Plac1	6	0.034411	0.063503	0.969239	1478	1	Vps26a	0.038711	0.065158	0.984507	1478	1	Gm12429	0.038549	0.065695	0.987813	1478	1
Hbb-b2	3	0.034475	0.063596	0.969239	1479	1	Zfp451	0.038711	0.065158	0.984507	1479	1	Fblim1	0.038566	0.06572	0.987813	1479	2
Olfr734	6	0.03448	0.063604	0.969239	1480	1	Nup98	0.038711	0.065158	0.984507	1480	1	Krtap13-1	0.038595	0.065762	0.987813	1480	1
Lpin2	6	0.034526	0.063681	0.969239	1481	2	1700022I11Rik	0.038711	0.065158	0.984507	1481	1	Nr1h5	0.038642	0.065829	0.987813	1481	1
mmu-mir-8097	4	0.034544	0.063707	0.969239	1482	2	Eva1c	0.038711	0.065158	0.984507	1482	1	Fam126b	0.038688	0.065905	0.987813	1482	1
Gm129	6	0.034573	0.063745	0.969239	1483	1	Clip1	0.038711	0.065158	0.984507	1483	1	mmu-mir-31	0.038712	0.065947	0.987813	1483	1
Adamts3	6	0.03459	0.063775	0.969239	1484	2	Tnfrsf19	0.038711	0.065158	0.984507	1484	1	Akr1c13	0.038734	0.06598	0.987813	1484	1
Gata3	6	0.0346	0.063788	0.969239	1485	2	Fmnl2	0.038711	0.065158	0.984507	1485	1	Clec4a3	0.038753	0.066016	0.987813	1485	2
Cdip1	6	0.034619	0.063825	0.969239	1486	1	H3f3b	0.038711	0.065158	0.984507	1486	1	Il5	0.03878	0.066054	0.987813	1486	1
mmu-mir-7001	4	0.03463	0.063845	0.969239	1487	1	Mylpf	0.038711	0.065158	0.984507	1487	1	Dppa1	0.038795	0.066071	0.987813	1487	2
Ltn1	6	0.034645	0.063862	0.969239	1488	2	Zc3h12d	0.038711	0.065158	0.984507	1488	1	Espnl	0.038816	0.066106	0.987813	1488	2
Dhdh	6	0.034659	0.063891	0.969239	1489	2	Wbscr16	0.038711	0.065158	0.984507	1489	1	Slc12a1	0.038837	0.06614	0.987813	1489	2
Rhox8	6	0.034665	0.0639	0.969239	1490	1	St6gal1	0.038711	0.065158	0.984507	1490	1	Adcy7	0.038872	0.066196	0.987813	1490	1
Nipal1	6	0.034679	0.063916	0.969239	1491	2	Ddi1	0.038711	0.065158	0.984507	1491	1	NonTargetingControlGuideForMouse_0420	0.038957	0.06633	0.987813	1491	1
Dhx9	6	0.034689	0.063933	0.969239	1492	2	Slc5a10	0.038711	0.065158	0.984507	1492	1	Gsdmc	0.038965	0.066342	0.987813	1492	1
NonTargetingControlGuideForMouse_0045	1	0.034759	0.064057	0.970473	1493	1	Prr15	0.038711	0.065158	0.984507	1493	1	Klra17	0.038972	0.066354	0.987813	1493	2
H2-Q4	6	0.034804	0.064119	0.970751	1494	1	Otud7b	0.038711	0.065158	0.984507	1494	1	Creb3l2	0.039014	0.066413	0.987813	1494	2
Ccdc114	6	0.034851	0.064197	0.971281	1495	1	Cct7	0.038711	0.065158	0.984507	1495	1	mmu-mir-7661	0.03902	0.066423	0.987813	1495	1
Foxd4	6	0.034897	0.064267	0.971461	1496	1	Map3k6	0.038711	0.065158	0.984507	1496	1	Shank3	0.039035	0.066451	0.987813	1496	2
Rbfa	6	0.034943	0.064334	0.971461	1497	1	Dynlt3	0.038711	0.065158	0.984507	1497	1	Rdh19	0.039056	0.066484	0.987813	1497	2
Ccar1	6	0.034968	0.064371	0.971461	1498	2	Blmh	0.038774	0.065253	0.985284	1498	2	Bdkrb1	0.039057	0.066485	0.987813	1498	1
Fance	6	0.034989	0.064399	0.971461	1499	1	Pcif1	0.038837	0.06535	0.986093	1499	2	Ndufaf2	0.039103	0.066554	0.987813	1499	1
Calb2	6	0.035008	0.064429	0.971461	1500	2	Slc5a9	0.038915	0.065479	0.987383	1500	2	Atrx	0.039119	0.066575	0.987813	1500	2
Gsdmc	6	0.035036	0.064466	0.971461	1501	1	Gm5108	0.039014	0.065625	0.988915	1501	2	Gm3604	0.039149	0.066622	0.987813	1501	1
Zcwpw1	6	0.035098	0.064571	0.971625	1502	2	Gstt1	0.039087	0.06574	0.989358	1502	2	Ciapin1	0.039195	0.066692	0.987813	1502	1
Stxbp3a	6	0.035158	0.064663	0.971625	1503	2	Vamp5	0.03915	0.065828	0.989358	1503	2	Pitpnm1	0.039241	0.066774	0.987813	1503	1
Ttc36	6	0.035158	0.064663	0.971625	1504	2	Tcf21	0.039171	0.065861	0.989358	1504	2	mmu-mir-504	0.039267	0.06681	0.987813	1504	1
Fes	6	0.035175	0.064684	0.971625	1505	1	Ly6g6e	0.039244	0.065973	0.989358	1505	2	Jak2	0.039288	0.066842	0.987813	1505	1
Tnc	6	0.035228	0.064767	0.971625	1506	2	2010015L04Rik	0.039312	0.066079	0.989358	1506	2	Olfr1145	0.039302	0.066868	0.987813	1506	2
M6pr	6	0.035238	0.06478	0.971625	1507	2	mmu-mir-7086	0.039314	0.066081	0.989358	1507	1	Enam	0.039302	0.066868	0.987813	1507	2
Parp11	6	0.035298	0.064874	0.971625	1508	2	Ormdl3	0.039548	0.066454	0.989358	1508	2	Syt2	0.039302	0.066868	0.987813	1508	2
Ip6k1	6	0.035313	0.064896	0.971625	1509	1	Suclg2	0.03958	0.066511	0.989358	1509	2	Peg3	0.039391	0.066995	0.987813	1509	2
Slc35d2	6	0.035349	0.064946	0.971625	1510	2	Asxl2	0.039875	0.066949	0.989358	1510	2	Slc15a3	0.039506	0.067164	0.987813	1510	2
Zfp458	6	0.03536	0.064964	0.971625	1511	2	Sorl1	0.039875	0.066949	0.989358	1511	2	Tec	0.039517	0.067181	0.987813	1511	2
mmu-mir-17	4	0.035389	0.065014	0.971625	1512	1	Tppp3	0.039875	0.066949	0.989358	1512	2	Bpgm	0.039564	0.067266	0.987813	1512	1
Olfr915	6	0.035406	0.065034	0.971625	1513	1	Ttk	0.039875	0.066949	0.989358	1513	2	Trmt1	0.03961	0.067323	0.987813	1513	1
Gpcpd1	6	0.035452	0.065101	0.971625	1514	1	Samd4	0.039875	0.066949	0.989358	1514	2	Olfr720	0.039643	0.067373	0.987813	1514	2
Olfr469	6	0.035489	0.065151	0.971625	1515	2	Rad9b	0.039875	0.066949	0.989358	1515	2	Lmx1b	0.039657	0.06739	0.987813	1515	1
Clec2l	6	0.035499	0.065162	0.971625	1516	1	Il27	0.039875	0.066949	0.989358	1516	2	NonTargetingControlGuideForMouse_0517	0.039728	0.067493	0.987813	1516	1
mmu-mir-124-3	4	0.0355	0.065164	0.971625	1517	2	Olfr472	0.039979	0.067115	0.989358	1517	1	Gpr114	0.039749	0.067526	0.987813	1517	1
mmu-mir-5132	4	0.03559	0.065291	0.972262	1518	1	Ciapin1	0.040025	0.067203	0.989358	1518	1	Ptk2	0.03979	0.067603	0.987813	1518	2
Raver2	6	0.035591	0.065293	0.972262	1519	1	Ciita	0.040532	0.067654	0.989358	1519	1	Rpa2	0.03979	0.067603	0.987813	1519	2
Ext2	6	0.035637	0.065366	0.972704	1520	1	Psmb6	0.040532	0.067654	0.989358	1520	1	Ptges	0.03979	0.067603	0.987813	1520	2
Olfr99	6	0.03569	0.065443	0.973217	1521	2	Rps23	0.040532	0.067654	0.989358	1521	1	Amz1	0.039795	0.067607	0.987813	1521	1
Nagpa	6	0.03573	0.065499	0.973226	1522	2	Mpc2	0.040532	0.067654	0.989358	1522	1	1810013L24Rik	0.039841	0.06768	0.987813	1522	1
1700007K09Rik	6	0.035771	0.065551	0.973226	1523	2	Spag4	0.040532	0.067654	0.989358	1523	1	Odf3l2	0.039875	0.067725	0.987813	1523	2
Olfr346	6	0.035823	0.065632	0.973226	1524	1	Marcks	0.040532	0.067654	0.989358	1524	1	Olfr657	0.039906	0.067776	0.987813	1524	2
2200002J24Rik	6	0.035836	0.065657	0.973226	1525	2	Adam6a	0.040532	0.067654	0.989358	1525	1	Gjd3	0.039933	0.06782	0.987813	1525	1
Gm5141	4	0.035838	0.065659	0.973226	1526	2	Trappc5	0.040532	0.067654	0.989358	1526	1	Nup93	0.040023	0.067955	0.987813	1526	2
Vmn2r77	6	0.035961	0.065843	0.973708	1527	1	Olfr1104	0.040532	0.067654	0.989358	1527	1	Mapk14	0.040025	0.067963	0.987813	1527	1
Igsf10	6	0.035972	0.06586	0.973708	1528	2	Slc22a15	0.040532	0.067654	0.989358	1528	1	Gabrr3	0.040118	0.068118	0.987813	1528	2
mmu-mir-5619	4	0.036006	0.065902	0.973708	1529	2	Edar	0.040532	0.067654	0.989358	1529	1	Nmral1	0.040118	0.068118	0.987813	1529	1
Serpinb10	6	0.036008	0.065904	0.973708	1530	2	Heatr5a	0.040532	0.067654	0.989358	1530	1	Pgam5	0.040164	0.068184	0.987813	1530	1
Tnfrsf9	6	0.036013	0.06591	0.973708	1531	2	Emc3	0.040532	0.067654	0.989358	1531	1	Naa30	0.04017	0.068197	0.987813	1531	2
Lmx1b	6	0.036054	0.065971	0.973708	1532	1	Spink11	0.040564	0.067681	0.989358	1532	1	NonTargetingControlGuideForMouse_0922	0.040181	0.068211	0.987813	1532	1
Miip	6	0.036074	0.065999	0.973708	1533	2	Mxd4	0.041039	0.068049	0.989358	1533	1	Vmn2r96	0.04021	0.068258	0.987813	1533	1
Vmn2r73	6	0.0361	0.066036	0.973708	1534	1	F11	0.041085	0.068082	0.989358	1534	1	Ctsd	0.040348	0.068508	0.987813	1534	1
mmu-mir-3093	4	0.036237	0.066245	0.974062	1535	2	Grpr	0.041131	0.06812	0.989358	1535	1	Cep68	0.04035	0.068514	0.987813	1535	2
Pigp	6	0.036239	0.066248	0.974062	1536	1	Usp33	0.041177	0.068158	0.989358	1536	1	Plcg1	0.040382	0.06856	0.987813	1536	2
Rab11b	6	0.036256	0.066274	0.974062	1537	2	Cacng3	0.041269	0.068226	0.989358	1537	1	Mrpl12	0.040394	0.068579	0.987813	1537	1
Sppl2b	6	0.036266	0.066295	0.974062	1538	2	Vmn2r73	0.041316	0.068267	0.989358	1538	1	Ttc30a1	0.040425	0.06863	0.987813	1538	2
Vgll4	6	0.036285	0.066328	0.974062	1539	1	Hnrnpl	0.041362	0.068304	0.989358	1539	1	Htr2a	0.040435	0.068649	0.987813	1539	2
Them5	6	0.036331	0.066387	0.974062	1540	1	Ubxn11	0.041454	0.068373	0.989358	1540	1	Cd86	0.04044	0.068655	0.987813	1540	1
Dppa3	6	0.036378	0.066455	0.974062	1541	1	mmu-mir-380	0.041456	0.068375	0.989358	1541	1	Dap3	0.040486	0.068731	0.987813	1541	1
Raet1b	2	0.036444	0.066561	0.974062	1542	1	Rpl41	0.041456	0.068375	0.989358	1542	1	Cep57l1	0.040532	0.06881	0.987813	1542	1
Lphn2	6	0.036449	0.066568	0.974062	1543	2	Mapk14	0.041546	0.068448	0.989358	1543	1	Olfr305	0.040541	0.068823	0.987813	1543	2
Pklr	6	0.036464	0.066583	0.974062	1544	2	Taf13	0.041638	0.068515	0.989358	1544	1	Prrt3	0.040578	0.068879	0.987813	1544	1
Hoxb1	6	0.03647	0.066592	0.974062	1545	1	Wdr54	0.041684	0.068554	0.989358	1545	1	Mtrf1l	0.040625	0.068959	0.987813	1545	1
Ncald	6	0.036516	0.066664	0.974062	1546	1	Zmym4	0.04173	0.068599	0.989358	1546	1	Gm14124	0.040641	0.068983	0.987813	1546	1
Gjc3	6	0.036563	0.066722	0.974062	1547	2	Lasp1	0.041776	0.068637	0.989358	1547	1	NonTargetingControlGuideForMouse_0745	0.040666	0.069023	0.987813	1547	1
Abcg2	6	0.036609	0.066792	0.974062	1548	2	Defb19	0.041822	0.068684	0.989358	1548	1	Olfr1462	0.040671	0.06903	0.987813	1548	1
Swap70	6	0.036632	0.066829	0.974062	1549	2	Lgr4	0.041868	0.068719	0.989358	1549	1	Slc7a14	0.040717	0.069092	0.987813	1549	1
Ube2ql1	6	0.036652	0.066853	0.974062	1550	2	Gabrg1	0.042052	0.068848	0.989358	1550	1	Slc52a2	0.040733	0.069117	0.987813	1550	2
Lcn11	6	0.036655	0.066859	0.974062	1551	1	Deb1	0.042098	0.068887	0.989358	1551	1	Zswim7	0.040754	0.069148	0.987813	1551	2
Smn1	6	0.036701	0.066921	0.974062	1552	1	Tor1aip1	0.04219	0.068958	0.989358	1552	1	Chchd4	0.040855	0.069295	0.987813	1552	1
Vmn1r193	6	0.036713	0.066943	0.974062	1553	2	Ptger3	0.042282	0.069032	0.989358	1553	1	Fam69c	0.040882	0.069342	0.987813	1553	2
NonTargetingControlGuideForMouse_0739	1	0.036771	0.067023	0.974062	1554	1	Dxo	0.042328	0.069071	0.989358	1554	1	Ggct	0.040892	0.069357	0.987813	1554	2
P2ry10	6	0.03684	0.067129	0.974062	1555	1	Trim30b	0.042374	0.069108	0.989358	1555	1	Erbb2ip	0.040978	0.069481	0.987813	1555	2
Olfr1294	6	0.036866	0.067156	0.974062	1556	2	Arid3b	0.042466	0.0692	0.989358	1556	1	Alpk1	0.040988	0.069494	0.987813	1556	2
Gm595	6	0.036933	0.067256	0.974062	1557	1	mmu-mir-7037	0.042503	0.069232	0.989358	1557	1	Unc79	0.041085	0.069644	0.987813	1557	1
Spesp1	6	0.036948	0.067283	0.974062	1558	2	Fkbp6	0.042512	0.069236	0.989358	1558	1	Ighmbp2	0.041131	0.069716	0.987813	1558	1
Hsd3b5	6	0.036979	0.067321	0.974062	1559	1	NonTargetingControlGuideForMouse_0008	0.042598	0.069302	0.989358	1559	1	Mmp21	0.041177	0.069783	0.987813	1559	1
Stac2	6	0.037004	0.067358	0.974062	1560	2	Has3	0.042604	0.069305	0.989358	1560	1	Rabl6	0.041218	0.069846	0.987813	1560	2
Ly86	6	0.037025	0.067393	0.974062	1561	1	Mylk2	0.042742	0.069407	0.989358	1561	1	Dzank1	0.041218	0.069846	0.987813	1561	2
Cmss1	6	0.037029	0.067401	0.974062	1562	2	Fam175b	0.042834	0.069478	0.989358	1562	1	Msx1	0.041218	0.069846	0.987813	1562	2
Fto	6	0.03705	0.067436	0.974062	1563	2	Zc3h12c	0.04288	0.069509	0.989358	1563	1	Atp6v1b1	0.041223	0.069858	0.987813	1563	1
Rufy3	6	0.037117	0.067535	0.974062	1564	1	Cyp2c54	0.042926	0.069543	0.989358	1564	1	Krtap6-1	0.041269	0.069929	0.987813	1564	1
Plce1	6	0.037162	0.067613	0.974062	1565	2	NonTargetingControlGuideForMouse_0649	0.042979	0.069579	0.989358	1565	1	Sec1	0.041269	0.069929	0.987813	1565	1
Gm9112	6	0.037183	0.067646	0.974062	1566	2	Eif2ak4	0.043018	0.06961	0.989358	1566	1	Rpl34-ps1	0.041313	0.069994	0.987813	1566	1
NonTargetingControlGuideForMouse_0748	1	0.037232	0.067709	0.974062	1567	1	Camk1	0.043064	0.069641	0.989358	1567	1	Tifa	0.041316	0.069999	0.987813	1567	1
Magi1	6	0.037256	0.067748	0.974062	1568	1	Tmem184a	0.043156	0.069706	0.989358	1568	1	NonTargetingControlGuideForMouse_0031	0.041334	0.070025	0.987813	1568	1
Naglu	6	0.037265	0.067768	0.974062	1569	2	Slc14a2	0.043294	0.069807	0.989358	1569	1	Hyal5	0.041408	0.070133	0.987813	1569	2
Olfr1462	6	0.037302	0.067835	0.974062	1570	2	Odf3	0.04334	0.06985	0.989358	1570	1	Cabs1	0.041448	0.070192	0.987813	1570	2
Mapk1ip1	6	0.037306	0.067841	0.974062	1571	2	Rnf4	0.043386	0.069891	0.989358	1571	1	Vmn1r40	0.041454	0.070204	0.987813	1571	1
Metap1d	6	0.037357	0.067922	0.974062	1572	2	mmu-mir-1970	0.043395	0.0699	0.989358	1572	1	Prpf31	0.041459	0.070211	0.987813	1572	2
Igsf1	6	0.037395	0.067983	0.974062	1573	1	Rerg	0.043432	0.069934	0.989358	1573	1	Aff3	0.0415	0.070269	0.987813	1573	1
Tmem54	6	0.037419	0.068015	0.974062	1574	2	Lrrc16b	0.043478	0.069972	0.989358	1574	1	Foxo4	0.041512	0.07029	0.987813	1574	2
Endov	6	0.037441	0.068053	0.974062	1575	2	Tmod4	0.043524	0.070005	0.989358	1575	1	Bbox1	0.041523	0.070308	0.987813	1575	2
Gtpbp2	6	0.037487	0.068121	0.974062	1576	2	Clmn	0.04357	0.070032	0.989358	1576	1	Fam209	0.041546	0.070337	0.987813	1576	2
Gpr183	6	0.037527	0.068184	0.974062	1577	2	Nox1	0.043616	0.07007	0.989358	1577	1	Kbtbd12	0.041576	0.070384	0.987813	1577	2
Glrp1	6	0.037527	0.068184	0.974062	1578	2	Themis3	0.043708	0.070138	0.989358	1578	1	Olfr1507	0.041592	0.070406	0.987813	1578	1
Lcn6	6	0.037573	0.068259	0.974062	1579	2	Klra17	0.043754	0.070173	0.989358	1579	1	Coro7	0.041638	0.070486	0.987813	1579	1
Plrg1	6	0.037579	0.068273	0.974062	1580	1	Dvl3	0.0438	0.070215	0.989358	1580	1	Smcr8	0.041684	0.070564	0.987813	1580	2
mmu-mir-8111	4	0.037629	0.068345	0.974062	1581	2	Smn1	0.043845	0.070245	0.989358	1581	1	Trim71	0.041684	0.070564	0.987813	1581	1
Zfp866	6	0.037649	0.068372	0.974062	1582	1	Ppp3cb	0.043891	0.070283	0.989358	1582	1	Fam13a	0.04173	0.070641	0.987813	1582	1
Defb19	6	0.037764	0.068549	0.974062	1583	1	Zdhhc8	0.044075	0.070422	0.989358	1583	1	NonTargetingControlGuideForMouse_0761	0.041731	0.070642	0.987813	1583	1
Lao1	6	0.03781	0.068613	0.974062	1584	2	Morc3	0.044121	0.070458	0.989358	1584	1	Papd4	0.041822	0.070779	0.987813	1584	2
Myh2	6	0.037851	0.068675	0.974062	1585	2	NonTargetingControlGuideForMouse_0464	0.044164	0.070497	0.989358	1585	1	NonTargetingControlGuideForMouse_0112	0.041851	0.070822	0.987813	1585	1
Ccdc153	6	0.037861	0.068688	0.974062	1586	2	Rbms1	0.044167	0.070498	0.989358	1586	1	Olfr1220	0.041868	0.070845	0.987813	1586	1
Ssrp1	6	0.037898	0.068743	0.974062	1587	2	Rnase11	0.044259	0.070573	0.989358	1587	1	Ivl	0.041926	0.070922	0.987813	1587	2
1190007I07Rik	6	0.037898	0.068743	0.974062	1588	2	Fam20a	0.044305	0.070609	0.989358	1588	1	Dennd6a	0.041926	0.070922	0.987813	1588	2
Golga4	6	0.037903	0.068752	0.974062	1589	1	Clec5a	0.044351	0.070657	0.989358	1589	1	Sh3glb1	0.041926	0.070922	0.987813	1589	2
Surf2	6	0.037923	0.068785	0.974062	1590	2	Mecp2	0.044397	0.070692	0.989358	1590	1	Zfyve21	0.041926	0.070922	0.987813	1590	2
Apol7e	5	0.037946	0.068824	0.974062	1591	1	Hoxc9	0.04458	0.070833	0.989358	1591	1	Etv3	0.04196	0.07097	0.987813	1591	1
Dmtf1	6	0.037995	0.068902	0.974062	1592	1	Hoxb1	0.044672	0.070902	0.989358	1592	1	Stat6	0.042052	0.071097	0.987813	1592	1
Vac14	6	0.038041	0.068978	0.974062	1593	1	Myl3	0.044718	0.070945	0.989358	1593	1	Gchfr	0.042098	0.07117	0.987813	1593	1
Nmnat3	6	0.038088	0.069041	0.974062	1594	2	Nup155	0.044764	0.070977	0.989358	1594	1	mmu-mir-6955	0.042134	0.071223	0.987813	1594	1
4933413G19Rik	6	0.038166	0.069154	0.974062	1595	2	mmu-mir-7210	0.04481	0.071006	0.989358	1595	1	Kcnh2	0.042144	0.071237	0.987813	1595	1
Madcam1	6	0.038166	0.069154	0.974062	1596	2	Olah	0.04481	0.071006	0.989358	1596	1	Rgs5	0.042236	0.071382	0.987813	1596	1
Gm5615	6	0.03818	0.069174	0.974062	1597	1	Rhbdl2	0.044948	0.071128	0.989358	1597	1	Smoc2	0.042374	0.07158	0.987813	1597	1
Cpne4	6	0.038226	0.069234	0.974062	1598	1	mmu-mir-8103	0.044963	0.071139	0.989358	1598	1	Ap1b1	0.042417	0.071642	0.987813	1598	2
Rhbdl2	6	0.038272	0.069301	0.974062	1599	1	Ercc4	0.044994	0.071161	0.989358	1599	1	Ppp2r3c	0.042417	0.071642	0.987813	1599	2
mmu-mir-1191	4	0.038279	0.069309	0.974062	1600	1	mmu-mir-466l	0.045036	0.071196	0.989358	1600	1	1700018B08Rik	0.042417	0.071642	0.987813	1600	2
Kctd1	6	0.038318	0.069374	0.974062	1601	2	Taar8a	0.045039	0.0712	0.989358	1601	1	Syna	0.042417	0.071642	0.987813	1601	2
Ptgs2	6	0.038332	0.069388	0.974062	1602	2	Wdr96	0.045131	0.071281	0.989358	1602	1	Brca2	0.042417	0.071642	0.987813	1602	2
Cgrrf1	6	0.038332	0.069388	0.974062	1603	2	Mrgpra6	0.045131	0.071281	0.989358	1603	1	Mief2	0.042417	0.071642	0.987813	1603	2
Stk4	6	0.038332	0.069388	0.974062	1604	2	Pomt2	0.045131	0.071281	0.989358	1604	1	Rfxank	0.042417	0.071642	0.987813	1604	2
Rnf165	6	0.038332	0.069388	0.974062	1605	2	NonTargetingControlGuideForMouse_0163	0.045134	0.071284	0.989358	1605	1	Tmem41b	0.042417	0.071642	0.987813	1605	2
Selrc1	6	0.038332	0.069388	0.974062	1606	2	Fcrla	0.045269	0.071392	0.989358	1606	1	Osbpl7	0.042417	0.071642	0.987813	1606	2
Suv420h1	6	0.038332	0.069388	0.974062	1607	2	Olfr1131	0.045315	0.071422	0.989358	1607	1	Nus1	0.042417	0.071642	0.987813	1607	2
Usp17ld	4	0.038337	0.069397	0.974062	1608	2	Snx19	0.045407	0.0715	0.989358	1608	1	Myl10	0.04242	0.071645	0.987813	1608	1
mmu-mir-381	4	0.038411	0.069502	0.974062	1609	2	Gm5615	0.045453	0.071541	0.989358	1609	1	Cd24a	0.042512	0.071778	0.987813	1609	1
Olfr1389	6	0.038457	0.069571	0.974062	1610	1	Pgam5	0.045498	0.071576	0.989358	1610	1	Sprr2k	0.042558	0.07185	0.987813	1610	1
Cst6	6	0.038483	0.06961	0.974062	1611	2	Igf2bp2	0.045544	0.071619	0.989358	1611	1	Dmxl2	0.042604	0.071922	0.987813	1611	2
Tax1bp1	6	0.038549	0.069711	0.974062	1612	1	Rhbdl3	0.04559	0.071654	0.989358	1612	1	Dnajc5b	0.04265	0.071981	0.987813	1612	1
S100a7a	6	0.038595	0.069776	0.974062	1613	1	mmu-mir-3070a	0.045614	0.071669	0.989358	1613	1	Raet1b	0.042786	0.072187	0.987813	1613	1
Rhox5	6	0.038607	0.069796	0.974062	1614	2	Polr3d	0.045682	0.071733	0.989358	1614	1	Olfr1143	0.042788	0.07219	0.987813	1614	1
Atm	6	0.03867	0.069887	0.974062	1615	2	Adcyap1	0.045728	0.071774	0.989358	1615	1	Spz1	0.042828	0.072251	0.987813	1615	2
Tcf25	6	0.038696	0.069925	0.974062	1616	2	Fance	0.045774	0.071811	0.989358	1616	1	Olah	0.042834	0.072257	0.987813	1616	1
mmu-mir-6397	4	0.038712	0.069954	0.974062	1617	1	Lrrc40	0.04582	0.071847	0.989358	1617	1	mmu-mir-344-1	0.042842	0.072268	0.987813	1617	1
Bicd1	6	0.038722	0.069972	0.974062	1618	2	Mrgpra2a	0.045884	0.071905	0.989358	1618	1	Adh7	0.04288	0.072324	0.987813	1618	1
Cep85l	6	0.038734	0.069985	0.974062	1619	1	Sec24c	0.045957	0.071964	0.989358	1619	1	Cldn11	0.042883	0.072326	0.987813	1619	2
Map6	6	0.038743	0.070003	0.974062	1620	2	Gm14124	0.045973	0.071974	0.989358	1620	1	Eda2r	0.042926	0.072388	0.987813	1620	1
Scgb3a2	6	0.038753	0.070017	0.974062	1621	2	N4bp3	0.046003	0.072002	0.989358	1621	1	NonTargetingControlGuideForMouse_0578	0.04294	0.072417	0.987813	1621	1
Zpld1	6	0.038826	0.070126	0.974062	1622	2	Tmco2	0.046049	0.072046	0.989358	1622	1	Olfr561	0.042972	0.072457	0.987813	1622	1
1700003F12Rik	6	0.038849	0.070161	0.974062	1623	1	Lurap1l	0.046095	0.072076	0.989358	1623	1	Ccdc176	0.043013	0.072524	0.987813	1623	2
Exo1	6	0.038849	0.070161	0.974062	1624	1	Prl2c2	0.046104	0.072081	0.989358	1624	1	Aqp5	0.043018	0.072531	0.987813	1624	1
Vmn2r74	6	0.038849	0.070161	0.974062	1625	1	Olfr543	0.046141	0.072106	0.989358	1625	1	Stx16	0.043024	0.072538	0.987813	1625	2
6430571L13Rik	6	0.038863	0.070186	0.974062	1626	2	Spag6	0.046186	0.072147	0.989358	1626	1	Kctd18	0.043046	0.072567	0.987813	1626	2
Tceanc2	6	0.038884	0.070215	0.974062	1627	2	mmu-mir-467d	0.046231	0.072176	0.989358	1627	1	Casp4	0.04311	0.072658	0.987813	1627	1
Olfr399	6	0.038931	0.070285	0.974062	1628	2	Msi2	0.046232	0.072177	0.989358	1628	1	mmu-mir-717	0.043149	0.072713	0.987813	1628	1
Adck3	6	0.038965	0.070347	0.974062	1629	1	Rrn3	0.046278	0.07222	0.989358	1629	1	Dnajc5g	0.043166	0.072732	0.987813	1629	2
mmu-let-7g	4	0.039003	0.0704	0.974062	1630	2	Msh2	0.046324	0.07225	0.989358	1630	1	Olfr1178	0.043166	0.072732	0.987813	1630	2
Mab21l3	6	0.039004	0.070401	0.974062	1631	2	1700013F07Rik	0.046462	0.072359	0.989358	1631	1	Pabpc2	0.043202	0.072783	0.987813	1631	1
Dffb	6	0.039011	0.070409	0.974062	1632	1	Rilp	0.046507	0.072388	0.989358	1632	1	Zfp369	0.043248	0.072855	0.987813	1632	1
3830417A13Rik	6	0.039014	0.070412	0.974062	1633	2	Hist1h2bg	0.046677	0.072513	0.989358	1633	1	Cnr2	0.043329	0.072994	0.987813	1633	2
1700007K13Rik	6	0.039025	0.070428	0.974062	1634	2	Vegfa	0.046782	0.072603	0.989358	1634	1	Nop2	0.043356	0.073033	0.987813	1634	2
Zfp451	6	0.039056	0.070478	0.974062	1635	2	Odc1	0.046782	0.072603	0.989358	1635	1	Vmn2r114	0.043386	0.073079	0.987813	1635	1
Olfr181	6	0.039057	0.070479	0.974062	1636	2	Rpl36	0.046782	0.072603	0.989358	1636	1	Smek2	0.043406	0.073108	0.987813	1636	2
Mall	6	0.039072	0.070496	0.974062	1637	2	Srp68	0.046782	0.072603	0.989358	1637	1	Cul9	0.043416	0.073127	0.987813	1637	2
Ddx60	6	0.039149	0.070607	0.974625	1638	1	Myo1e	0.046782	0.072603	0.989358	1638	1	Fstl4	0.043432	0.073151	0.987813	1638	1
Skint11	6	0.03916	0.070623	0.974625	1639	2	Ppp1cb	0.046782	0.072603	0.989358	1639	1	Cox18	0.043471	0.073202	0.987813	1639	2
Slc6a4	6	0.039192	0.070666	0.974635	1640	2	mmu-mir-5621	0.046989	0.072776	0.989358	1640	1	Dnmt3l	0.043504	0.073252	0.987813	1640	2
Rad21l	6	0.039318	0.070855	0.974867	1641	2	1110012L19Rik	0.047012	0.072789	0.989358	1641	1	Crybg3	0.043548	0.073319	0.987813	1641	2
Cul4b	6	0.039334	0.07088	0.974867	1642	1	Dppa2	0.047057	0.072825	0.989358	1642	1	Ube2u	0.04357	0.073346	0.987813	1642	1
Ncdn	6	0.039339	0.070887	0.974867	1643	2	Sipa1l3	0.047149	0.072898	0.989358	1643	1	Gbgt1	0.043616	0.07342	0.987813	1643	1
Rbms2	6	0.039422	0.071001	0.974867	1644	2	Sval3	0.047195	0.072933	0.989358	1644	1	Olfr539	0.043695	0.07353	0.987813	1644	2
Olfr804	6	0.039433	0.071022	0.974867	1645	2	Hoxd3	0.047286	0.073002	0.989358	1645	1	Myh7	0.043695	0.07353	0.987813	1645	2
Urb2	6	0.039518	0.071143	0.974867	1646	1	Rps15a	0.047332	0.073041	0.989358	1646	1	Traf3ip3	0.043708	0.07355	0.987813	1646	1
Irak4	6	0.039548	0.07119	0.974867	1647	2	Igf2r	0.047378	0.073078	0.989358	1647	1	Cdk5r2	0.043777	0.073657	0.987813	1647	2
Lphn1	6	0.039559	0.071209	0.974867	1648	2	Nln	0.047424	0.073112	0.989358	1648	1	Igf2	0.043845	0.073754	0.987813	1648	1
Serpinb13	6	0.039564	0.071217	0.974867	1649	1	Olfr99	0.04747	0.073149	0.989358	1649	1	Fbxo28	0.043865	0.073781	0.987813	1649	2
Vmn1r183	6	0.039664	0.071351	0.974867	1650	2	Jrkl	0.047515	0.073186	0.989358	1650	1	4930451G09Rik	0.043876	0.073801	0.987813	1650	2
Pacsin1	6	0.039675	0.071365	0.974867	1651	2	Pgm2	0.047561	0.073224	0.989358	1651	1	1700007K09Rik	0.043887	0.073814	0.987813	1651	2
Alppl2	6	0.039685	0.071379	0.974867	1652	2	Cyld	0.047607	0.073265	0.989358	1652	1	Arglu1	0.043891	0.07382	0.987813	1652	1
1110012L19Rik	6	0.039703	0.07141	0.974867	1653	1	Ssh2	0.047744	0.073382	0.989358	1653	1	Golim4	0.04392	0.073865	0.987813	1653	2
Tlx3	6	0.039749	0.071484	0.974867	1654	1	Gje1	0.047836	0.073443	0.989358	1654	1	3110009E18Rik	0.043937	0.073882	0.987813	1654	1
Slc25a54	6	0.039769	0.071518	0.974867	1655	2	Srp72	0.047882	0.073476	0.989358	1655	1	Pcdhb12	0.043983	0.073954	0.987813	1655	1
Ghr	6	0.039795	0.071562	0.974867	1656	1	9230112D13Rik	0.047928	0.073515	0.989358	1656	1	Zfp354b	0.044019	0.074007	0.987813	1656	2
Cd209e	6	0.039796	0.071564	0.974867	1657	2	Tanc2	0.047973	0.073546	0.989358	1657	1	Olfr1370	0.044029	0.074024	0.987813	1657	1
Olfr544	6	0.039887	0.071694	0.974867	1658	1	Atp2b4	0.048065	0.07362	0.989358	1658	1	Maf	0.04403	0.074025	0.987813	1658	2
Mfsd4	6	0.039933	0.071764	0.974867	1659	1	Nqo2	0.048202	0.073726	0.989358	1659	1	Ifna13	0.044041	0.074043	0.987813	1659	2
Tdh	6	0.039979	0.07183	0.974867	1660	1	Olfr466	0.048294	0.073801	0.989358	1660	1	4930451C15Rik	0.044075	0.074096	0.987813	1660	1
Sdr16c5	6	0.039996	0.071853	0.974867	1661	2	Wapal	0.04834	0.073839	0.989358	1661	1	Olfr669	0.044121	0.074164	0.987813	1661	1
Asap3	6	0.040025	0.071908	0.974867	1662	1	Dffb	0.048385	0.073861	0.989358	1662	1	Fdx1	0.044162	0.074236	0.987813	1662	2
Commd8	6	0.040044	0.071939	0.974867	1663	2	mmu-mir-7007	0.048476	0.073941	0.989358	1663	1	Klra22	0.044164	0.074238	0.987813	1663	1
Wfdc3	6	0.040075	0.071989	0.974867	1664	2	Mx2	0.048523	0.073979	0.989358	1664	1	Nxt1	0.04425	0.074359	0.987813	1664	2
Sync	6	0.040086	0.072006	0.974867	1665	2	Gm7609	0.048568	0.074015	0.989358	1665	1	Tssk4	0.044259	0.074374	0.987813	1665	1
Tph1	6	0.040107	0.072036	0.974867	1666	2	Dnajc2	0.048614	0.074048	0.989358	1666	1	Wdr31	0.044261	0.074376	0.987813	1666	2
Ctse	6	0.040118	0.072055	0.974867	1667	1	Gabra4	0.04866	0.074078	0.989358	1667	1	Lrrc72	0.044305	0.074443	0.987813	1667	1
Gje1	6	0.040164	0.072127	0.974867	1668	1	Csk	0.048706	0.074113	0.989358	1668	1	Jmjd8	0.044338	0.074505	0.987813	1668	2
Esp16	6	0.04021	0.072203	0.974867	1669	1	Hvcn1	0.048751	0.07414	0.989358	1669	1	Olfr1131	0.044351	0.074526	0.987813	1669	1
Htr1b	6	0.040213	0.072208	0.974867	1670	2	Fam115a	0.048797	0.07417	0.989358	1670	1	Mrap2	0.044382	0.074571	0.987813	1670	2
Mmp24	6	0.040256	0.072272	0.974867	1671	2	Setbp1	0.048843	0.074203	0.989358	1671	1	Gpx8	0.044397	0.074598	0.987813	1671	1
Mroh4	6	0.040302	0.072342	0.974867	1672	2	Bcan	0.048889	0.074242	0.989358	1672	1	Scn2a1	0.044404	0.074608	0.987813	1672	2
Gcnt2	6	0.040348	0.072416	0.974867	1673	1	4931406P16Rik	0.048934	0.074276	0.989358	1673	1	Deb1	0.044443	0.074665	0.987813	1673	1
2810417H13Rik	6	0.040372	0.07246	0.974867	1674	2	Taar7e	0.049072	0.074376	0.989358	1674	1	Zfp933	0.044481	0.07472	0.987813	1674	2
Dera	6	0.040393	0.072495	0.974867	1675	2	Esr1	0.049117	0.074408	0.989358	1675	1	mmu-mir-106b	0.044502	0.074755	0.987813	1675	1
Rpl22l1	6	0.040394	0.072499	0.974867	1676	2	Ube2v2	0.049163	0.074451	0.989358	1676	1	Fbxl21	0.044534	0.074803	0.987813	1676	1
Fbxw10	6	0.040409	0.072518	0.974867	1677	2	Fbxw4	0.049209	0.074484	0.989358	1677	1	Cited1	0.044536	0.074804	0.987813	1677	2
Hnf4g	6	0.040409	0.072518	0.974867	1678	2	4932418E24Rik	0.049255	0.074525	0.989358	1678	1	Ube4a	0.044558	0.07484	0.987813	1678	2
Gfpt1	6	0.040425	0.072538	0.974867	1679	2	Gm829	0.0493	0.074559	0.989358	1679	1	Oas3	0.044569	0.074858	0.987813	1679	2
Exosc1	6	0.04044	0.072563	0.974867	1680	1	Cep290	0.049346	0.074595	0.989358	1680	1	Fgf14	0.04458	0.074873	0.987813	1680	1
Col24a1	6	0.040486	0.072634	0.974867	1681	1	C2cd4a	0.049392	0.074638	0.989358	1681	1	Kdm6a	0.044591	0.074892	0.987813	1681	2
Cic	6	0.040499	0.072654	0.974867	1682	2	NonTargetingControlGuideForMouse_0819	0.049482	0.074713	0.989358	1682	1	Grm1	0.044613	0.074925	0.987813	1682	2
Prr9	6	0.040532	0.072708	0.974867	1683	1	Nrip2	0.049483	0.074714	0.989358	1683	1	Rpl36	0.044741	0.075129	0.987813	1683	1
Adam24	6	0.040563	0.072755	0.974867	1684	2	NonTargetingControlGuideForMouse_0563	0.049514	0.074739	0.989358	1684	1	Hectd2	0.044741	0.075129	0.987813	1684	1
Slirp	6	0.040578	0.072774	0.974867	1685	1	Nisch	0.049529	0.074756	0.989358	1685	1	Ube2j1	0.044741	0.075129	0.987813	1685	1
Hars	6	0.040605	0.072824	0.974867	1686	2	Vmn2r77	0.049575	0.074797	0.989358	1686	1	Clip4	0.044741	0.075129	0.987813	1686	2
Dfnb59	6	0.040637	0.072872	0.974867	1687	2	Ap1m1	0.04962	0.074835	0.989358	1687	1	Dnajc30	0.044801	0.075209	0.987813	1687	2
Gm14139	6	0.040648	0.072884	0.974867	1688	2	Olfr342	0.049666	0.074872	0.989358	1688	1	Olfr417	0.044923	0.075406	0.987813	1688	2
Ermn	6	0.040648	0.072884	0.974867	1689	2	Ccnj	0.049757	0.07496	0.989358	1689	1	Bdnf	0.044948	0.075444	0.987813	1689	1
Gcnt1	6	0.04069	0.072948	0.974867	1690	2	Mcoln3	0.049803	0.074989	0.989358	1690	1	Pla2g4e	0.044994	0.075514	0.987813	1690	1
Hnrnpr	6	0.040717	0.072984	0.974867	1691	2	2310039H08Rik	0.049849	0.075024	0.989358	1691	1	Fam110c	0.045023	0.075558	0.987813	1691	2
Atp2b4	6	0.040733	0.07301	0.974867	1692	2	Dgkg	0.049895	0.075052	0.989358	1692	1	Chil6	0.045039	0.075583	0.987813	1692	1
Golgb1	6	0.040807	0.073116	0.974867	1693	2	Wdr86	0.050032	0.07516	0.989358	1693	1	4933413G19Rik	0.045067	0.075625	0.987813	1693	2
Tmbim1	6	0.040809	0.073119	0.974867	1694	1	Mc2r	0.050123	0.075243	0.989358	1694	1	Klk5	0.0451	0.075691	0.987813	1694	2
Sgce	6	0.040818	0.07313	0.974867	1695	2	Cystm1	0.050169	0.075279	0.989358	1695	1	Ikbkap	0.045167	0.075788	0.987813	1695	2
Camta1	6	0.040947	0.073326	0.974867	1696	1	Olfr1497	0.050215	0.075321	0.989358	1696	1	Spire1	0.0452	0.075839	0.987813	1696	2
Grlf1	6	0.040993	0.073394	0.974867	1697	1	Prss44	0.050306	0.075391	0.989358	1697	1	Mcm9	0.045246	0.075902	0.987813	1697	1
Klk1b27	6	0.040999	0.073402	0.974867	1698	2	Trafd1	0.050352	0.075431	0.989358	1698	1	Fut10	0.045246	0.075902	0.987813	1698	1
Crnkl1	6	0.04101	0.073418	0.974867	1699	2	1110058L19Rik	0.050397	0.075467	0.989358	1699	1	A830010M20Rik	0.045246	0.075902	0.987813	1699	1
Slc16a1	6	0.041039	0.073463	0.974867	1700	1	Selo	0.050489	0.075555	0.989358	1700	1	Tube1	0.045246	0.075902	0.987813	1700	1
Tmcc1	6	0.041164	0.073645	0.974867	1701	2	Ubap2l	0.050534	0.07559	0.989358	1701	1	Sh3yl1	0.045246	0.075902	0.987813	1701	1
3110002H16Rik	6	0.041196	0.073688	0.974867	1702	2	mmu-mir-466b-7	0.050571	0.075622	0.989358	1702	1	Pex5	0.045267	0.07593	0.987813	1702	2
Ttyh3	6	0.041244	0.073764	0.974867	1703	2	Tulp2	0.05058	0.075632	0.989358	1703	1	Dxo	0.045311	0.075986	0.987813	1703	2
Gm996	6	0.04133	0.073891	0.974867	1704	2	Pin4	0.050671	0.075704	0.989358	1704	1	Mdh1	0.045467	0.076236	0.987813	1704	2
Chic2	6	0.041351	0.073923	0.974867	1705	2	Olfr1245	0.050717	0.075743	0.989358	1705	1	mmu-let-7j	0.045485	0.076257	0.987813	1705	1
Gfod1	6	0.041501	0.074149	0.974867	1706	2	Irx2	0.050763	0.075779	0.989358	1706	1	Bves	0.045498	0.076279	0.987813	1706	1
Acot9	6	0.041544	0.074205	0.974867	1707	2	Rnase10	0.050808	0.075816	0.989358	1707	1	Heatr1	0.045544	0.076348	0.987813	1707	1
Zcchc2	6	0.041587	0.074274	0.974867	1708	2	Morc2b	0.050854	0.075847	0.989358	1708	1	Rab11a	0.045578	0.076397	0.987813	1708	2
Zfr	6	0.041641	0.074354	0.974867	1709	2	Olfr430	0.050945	0.075916	0.989358	1709	1	Ephb1	0.045623	0.076461	0.987813	1709	2
Perp	6	0.041684	0.074419	0.974867	1710	1	Lmx1b	0.050991	0.075951	0.989358	1710	1	Psmg4	0.045636	0.076489	0.987813	1710	1
Ddx54	6	0.041684	0.074419	0.974867	1711	1	Ap5m1	0.051082	0.076028	0.989358	1711	1	Nup85	0.045682	0.076566	0.987813	1711	1
Atp10b	6	0.041684	0.074419	0.974867	1712	1	Gm10094	0.051174	0.076099	0.989358	1712	1	Ldb1	0.04569	0.076582	0.987813	1712	2
Phlda3	6	0.041684	0.074419	0.974867	1713	2	Galr2	0.051219	0.076133	0.989358	1713	1	Msmb	0.045728	0.076638	0.987813	1713	1
Psmb3	6	0.041684	0.074419	0.974867	1714	2	Clca6	0.051265	0.076171	0.989358	1714	1	NonTargetingControlGuideForMouse_0914	0.045746	0.076667	0.987813	1714	1
Nfxl1	6	0.041684	0.074419	0.974867	1715	1	Traf3ip3	0.051311	0.076214	0.989358	1715	1	Capza3	0.04582	0.076781	0.987813	1715	1
Olfr656	6	0.041684	0.074419	0.974867	1716	1	Dnmt3l	0.051356	0.076247	0.989358	1716	1	Grasp	0.045865	0.076855	0.987813	1716	1
Atp6v1f	6	0.041684	0.074419	0.974867	1717	1	Clybl	0.051402	0.076281	0.989358	1717	1	Csmd2os	0.045911	0.076919	0.987813	1717	1
Mief1	6	0.041684	0.074419	0.974867	1718	1	mmu-mir-6954	0.051429	0.076299	0.989358	1718	1	Rogdi	0.045974	0.077006	0.987813	1718	2
Rb1cc1	6	0.041684	0.074419	0.974867	1719	1	Irf5	0.051448	0.076311	0.989358	1719	1	Olfr472	0.045974	0.077006	0.987813	1719	2
Hsd17b1	6	0.041684	0.074419	0.974867	1720	1	Myh8	0.051539	0.076387	0.989358	1720	1	Vipas39	0.045974	0.077006	0.987813	1720	2
Gtf3c3	6	0.041684	0.074419	0.974867	1721	1	Gm13051	0.051549	0.076392	0.989358	1721	1	Sun3	0.045974	0.077006	0.987813	1721	2
Rpl18	6	0.041684	0.074419	0.974867	1722	1	Bmx	0.05163	0.076443	0.989358	1722	1	Stradb	0.046049	0.077132	0.987813	1722	1
Mettl8	6	0.041684	0.074419	0.974867	1723	1	Srms	0.051721	0.076514	0.989358	1723	1	Krt19	0.04617	0.077306	0.987813	1723	2
Gm11744	6	0.041684	0.074419	0.974867	1724	2	Srsf7	0.051813	0.07658	0.989358	1724	1	Mta1	0.046186	0.077336	0.987813	1724	1
Adamts15	6	0.041684	0.074419	0.974867	1725	1	Olfr1220	0.051904	0.076661	0.989358	1725	1	A4galt	0.046243	0.077406	0.987813	1725	2
Fam187b	6	0.041721	0.074477	0.974867	1726	2	Duxbl2	0.051935	0.076684	0.989358	1726	1	Aym1	0.046278	0.077465	0.987813	1726	1
Napg	6	0.041738	0.074505	0.974867	1727	2	N28178	0.05195	0.076696	0.989358	1727	1	Olfr707	0.046316	0.077515	0.987813	1727	2
mmu-mir-3066	4	0.041747	0.074515	0.974867	1728	2	mmu-mir-7043	0.051979	0.07672	0.989358	1728	1	Rgl2	0.046324	0.077526	0.987813	1728	1
Tfap2b	6	0.041748	0.07452	0.974867	1729	2	B3gnt2	0.051995	0.076734	0.989358	1729	1	Hey2	0.046349	0.077562	0.987813	1729	2
Hsbp1l1	6	0.04178	0.074562	0.974867	1730	2	mmu-mir-7683	0.05204	0.076774	0.989358	1730	1	Caps2	0.046349	0.077562	0.987813	1730	2
Ganab	6	0.041834	0.074653	0.975493	1731	2	Mrps31	0.052041	0.076775	0.989358	1731	1	NonTargetingControlGuideForMouse_0066	0.046358	0.077579	0.987813	1731	1
Fam171b	6	0.042028	0.074913	0.976864	1732	2	mmu-mir-758	0.052101	0.076826	0.989358	1732	1	Plb1	0.046372	0.0776	0.987813	1732	2
Cstf2t	6	0.042114	0.075045	0.976864	1733	2	Tmc6	0.052132	0.076857	0.989358	1733	1	Mgst3	0.046383	0.077616	0.987813	1733	2
Polr3d	6	0.042211	0.075186	0.976864	1734	2	mmu-mir-875	0.052162	0.076881	0.989358	1734	1	Ccdc85c	0.046462	0.077742	0.987813	1734	1
Vmn2r116	6	0.042287	0.075297	0.976864	1735	2	Smoc2	0.052178	0.076893	0.989358	1735	1	Olfr198	0.046507	0.077815	0.987813	1735	1
Zfp300	6	0.042328	0.07536	0.976864	1736	1	Iyd	0.052223	0.076931	0.989358	1736	1	Il12rb1	0.046518	0.07783	0.987813	1736	2
Ppapdc3	6	0.0424	0.075459	0.976864	1737	2	Rnf2	0.052269	0.076978	0.989358	1737	1	Mrpl23	0.046553	0.077873	0.987813	1737	1
Ogt	6	0.042417	0.075488	0.976864	1738	2	Pparg	0.052314	0.077015	0.989358	1738	1	Ogn	0.046599	0.077944	0.987813	1738	1
Foxd3	6	0.042449	0.075536	0.976864	1739	2	Dhrs7	0.05236	0.077055	0.989358	1739	1	Sumf2	0.046645	0.078011	0.987813	1739	1
Gm8298	6	0.042489	0.075584	0.976864	1740	1	mmu-mir-7235	0.052376	0.077071	0.989358	1740	1	Ppp3r1	0.046686	0.078078	0.987813	1740	2
Msi2	6	0.042489	0.075584	0.976864	1741	1	NonTargetingControlGuideForMouse_0420	0.052384	0.077077	0.989358	1741	1	Morf4l1	0.046691	0.078087	0.987813	1741	1
Brinp1	6	0.04253	0.075649	0.976864	1742	2	Lix1	0.052497	0.07717	0.989358	1742	1	Ttc16	0.046714	0.07813	0.987813	1742	2
Olfr472	6	0.042558	0.075693	0.976864	1743	1	Dapl1	0.052588	0.077241	0.989358	1743	1	Gm1661	0.046714	0.07813	0.987813	1743	2
Dpf3	6	0.042579	0.075726	0.976864	1744	2	Terf2	0.052634	0.077277	0.989358	1744	1	Kcna3	0.046748	0.078187	0.987813	1744	2
Olfr605	6	0.04259	0.07574	0.976864	1745	2	St18	0.05277	0.077387	0.989358	1745	1	Trim55	0.046782	0.078236	0.987813	1745	1
Slc2a8	6	0.042604	0.075758	0.976864	1746	1	Gm15114	0.052777	0.077392	0.989358	1746	1	Slc25a46	0.046828	0.078304	0.987813	1746	1
NonTargetingControlGuideForMouse_0096	1	0.042614	0.075763	0.976864	1747	1	Zbtb33	0.052862	0.077449	0.989358	1747	1	Arhgap21	0.046874	0.078375	0.987813	1747	1
Rcan1	6	0.04265	0.075813	0.976864	1748	1	Gdap1l1	0.052907	0.077483	0.989358	1748	1	Dcaf10	0.04692	0.078456	0.987813	1748	1
Gm5531	6	0.042655	0.075817	0.976864	1749	2	Zfp369	0.052953	0.077526	0.989358	1749	1	St6galnac4	0.046966	0.078525	0.987813	1749	1
Adcy2	6	0.042682	0.075857	0.976864	1750	2	mmu-mir-7222	0.053429	0.077892	0.989358	1750	1	Frzb	0.047012	0.078587	0.987813	1750	1
Ly6g6c	6	0.042696	0.075879	0.976864	1751	1	Cyp2b13	0.053591	0.07802	0.989358	1751	1	Bmp5	0.047035	0.078626	0.987813	1751	2
Amelx	6	0.042698	0.075881	0.976864	1752	2	Copa	0.053591	0.07802	0.989358	1752	1	Npy1r	0.047057	0.078659	0.987813	1752	1
Gas7	6	0.042709	0.075895	0.976864	1753	2	Cyp2b10	0.053591	0.07802	0.989358	1753	1	Stc1	0.047092	0.078718	0.987813	1753	2
Sh3bp5	6	0.042742	0.07594	0.976864	1754	1	Eif3b	0.053591	0.07802	0.989358	1754	1	Hspd1	0.047149	0.078815	0.987813	1754	1
Sidt2	6	0.042834	0.076075	0.976864	1755	2	Calml3	0.053591	0.07802	0.989358	1755	1	Pnck	0.047171	0.078841	0.987813	1755	2
Atp1a3	6	0.042904	0.076176	0.976864	1756	2	Mtpn	0.053591	0.07802	0.989358	1756	1	Actrt1	0.047195	0.078879	0.987813	1756	1
NonTargetingControlGuideForMouse_0664	1	0.042916	0.07619	0.976864	1757	1	Cdc42	0.053591	0.07802	0.989358	1757	1	Rps15a	0.047205	0.078895	0.987813	1757	2
Anxa3	6	0.042926	0.076204	0.976864	1758	1	Atp1a3	0.053591	0.07802	0.989358	1758	1	Mip	0.047227	0.078924	0.987813	1758	2
Dapl1	6	0.042981	0.076278	0.976864	1759	2	Sik1	0.053591	0.07802	0.989358	1759	1	Tnfsf18	0.047241	0.078946	0.987813	1759	1
Ctsc	6	0.043013	0.076327	0.976864	1760	2	Fhl2	0.053591	0.07802	0.989358	1760	1	Bub1b	0.047272	0.078986	0.987813	1760	2
Tmem218	6	0.043064	0.076403	0.976864	1761	1	Armcx1	0.053591	0.07802	0.989358	1761	1	Etfa	0.047286	0.079009	0.987813	1761	1
Dppa1	6	0.043122	0.076485	0.976864	1762	2	Scrt2	0.053591	0.07802	0.989358	1762	1	6030458C11Rik	0.047378	0.079161	0.987813	1762	1
Timm44	6	0.043156	0.076534	0.976864	1763	1	Sipa1l1	0.053591	0.07802	0.989358	1763	1	Lpin3	0.047424	0.079226	0.987813	1763	1
Psme4	6	0.043171	0.076556	0.976864	1764	2	Alkbh8	0.053591	0.07802	0.989358	1764	1	C77370	0.04747	0.079291	0.987813	1764	1
Slc25a46	6	0.04322	0.07663	0.976864	1765	2	NonTargetingControlGuideForMouse_0761	0.053695	0.078104	0.989358	1765	1	Usp26	0.04747	0.079293	0.987813	1765	2
Kcnj15	6	0.043225	0.076636	0.976864	1766	1	Olfr1381	0.053902	0.078273	0.989358	1766	1	Ush1c	0.04747	0.079293	0.987813	1766	2
Tnmd	6	0.043275	0.076705	0.976864	1767	2	Nt5c1a	0.05416	0.078492	0.989358	1767	1	Ccdc148	0.04747	0.079293	0.987813	1767	2
Rab25	6	0.043285	0.076721	0.976864	1768	2	Pdia6	0.054228	0.078545	0.989358	1768	1	Gck	0.04747	0.079293	0.987813	1768	2
3110009E18Rik	6	0.043294	0.076737	0.976864	1769	1	Nmral1	0.054274	0.078587	0.989358	1769	1	Jph4	0.04747	0.079293	0.987813	1769	2
Pnmt	6	0.043296	0.076742	0.976864	1770	2	Gpr34	0.054365	0.07866	0.989358	1770	1	Dgkh	0.047607	0.079514	0.987813	1770	1
9530077C05Rik	6	0.04334	0.076814	0.976864	1771	1	Gm44	0.054502	0.078762	0.989358	1771	1	Frmd6	0.047623	0.079547	0.987813	1771	2
Vangl2	6	0.043386	0.076888	0.976864	1772	1	Ebf1	0.054547	0.078792	0.989358	1772	1	Zdhhc9	0.047699	0.07966	0.987813	1772	1
Syne2	6	0.043395	0.076903	0.976864	1773	2	Sdr39u1	0.054638	0.078862	0.989358	1773	1	Olfr124	0.047703	0.079666	0.987813	1773	2
Phf13	6	0.043416	0.076943	0.976864	1774	2	Cep85l	0.054684	0.078902	0.989358	1774	1	Il24	0.04772	0.079694	0.987813	1774	2
Nisch	6	0.043432	0.076963	0.976864	1775	1	Vmn1r187	0.054689	0.078904	0.989358	1775	1	Nudcd1	0.047744	0.07974	0.987813	1775	1
Tlcd1	5	0.043444	0.07698	0.976864	1776	1	Ttc9	0.054729	0.078939	0.989358	1776	1	Lman2l	0.04779	0.079804	0.987813	1776	1
Ddit3	6	0.043504	0.077062	0.976864	1777	2	Gm5938	0.054775	0.078973	0.989358	1777	1	Slc40a1	0.047794	0.07981	0.987813	1777	2
Gm5592	6	0.043515	0.077081	0.976864	1778	2	Camta1	0.05482	0.079004	0.989358	1778	1	NonTargetingControlGuideForMouse_0044	0.047805	0.079828	0.987813	1778	1
Nt5c3	6	0.043524	0.077093	0.976864	1779	1	Mup17	0.054844	0.079019	0.989358	1779	1	Vax2	0.047836	0.079872	0.987813	1779	1
mmu-mir-669h	4	0.043549	0.077129	0.976864	1780	1	Tmem42	0.055002	0.079163	0.989358	1780	1	Stt3a	0.047867	0.079913	0.987813	1780	2
Lingo2	6	0.04358	0.077174	0.976864	1781	2	Kif26a	0.055048	0.079194	0.989358	1781	1	mmu-mir-3070a	0.047878	0.079923	0.987813	1781	1
mmu-mir-5127	4	0.043608	0.077213	0.976864	1782	2	Dnase1l3	0.05523	0.079361	0.989358	1782	1	Txnip	0.047882	0.07993	0.987813	1782	1
Cox4i1	6	0.043646	0.077265	0.976864	1783	2	NonTargetingControlGuideForMouse_0096	0.055293	0.079419	0.989358	1783	1	4933411K16Rik	0.047896	0.079955	0.987813	1783	2
Tanc2	6	0.043662	0.077289	0.976864	1784	1	Patl1	0.055321	0.079436	0.989358	1784	1	Gm10104	0.0479	0.079962	0.987813	1784	1
AI597468	6	0.043668	0.077297	0.976864	1785	2	Palb2	0.055412	0.079511	0.989358	1785	1	Deaf1	0.047928	0.080006	0.987813	1785	1
Grhl3	6	0.043708	0.077353	0.976864	1786	1	Ctf2	0.055503	0.079584	0.989358	1786	1	Apc2	0.047987	0.080087	0.987813	1786	2
Vmn1r1	6	0.043723	0.07737	0.976864	1787	2	Slc50a1	0.055548	0.079623	0.989358	1787	1	Pth2	0.048009	0.080113	0.987813	1787	2
Pgm2	6	0.043754	0.077409	0.976864	1788	1	Slc9a4	0.055684	0.079722	0.989358	1788	1	Rpn2	0.048042	0.080158	0.987813	1788	1
Insl3	6	0.043755	0.077412	0.976864	1789	2	Dennd6a	0.055775	0.079794	0.989358	1789	1	Cnpy1	0.048042	0.080158	0.987813	1789	1
Nthl1	6	0.0438	0.077482	0.976864	1790	1	Clvs1	0.055821	0.079839	0.989358	1790	1	Yif1b	0.048156	0.080332	0.987813	1790	1
2700029M09Rik	6	0.043843	0.077541	0.976864	1791	2	Olfr432	0.055866	0.079871	0.989358	1791	1	Pkp3	0.048214	0.080419	0.987813	1791	2
9830147E19Rik	6	0.043845	0.077544	0.976864	1792	1	Pcgf6	0.055912	0.079906	0.989358	1792	1	Vangl1	0.048214	0.080419	0.987813	1792	2
Olfr350	6	0.043876	0.07759	0.976864	1793	2	AA792892	0.05596	0.079949	0.989358	1793	1	Rassf10	0.048214	0.080419	0.987813	1793	2
Ccdc136	6	0.043891	0.077607	0.976864	1794	1	Naa11	0.056003	0.079986	0.989358	1794	1	Tgfbrap1	0.048214	0.080419	0.987813	1794	2
Slain1	6	0.043898	0.077616	0.976864	1795	2	Cd53	0.056185	0.080145	0.989358	1795	1	Gjb1	0.048248	0.080467	0.987813	1795	1
Pnma3	6	0.043953	0.077705	0.976864	1796	2	3110035E14Rik	0.05623	0.080179	0.989358	1796	1	Arhgap4	0.048385	0.080667	0.987813	1796	1
Scrt1	6	0.043983	0.077755	0.976864	1797	1	Ypel1	0.056321	0.080262	0.989358	1797	1	Gabrg1	0.048431	0.080746	0.987813	1797	1
Slc22a8	6	0.044019	0.077809	0.976864	1798	2	Phkg2	0.056366	0.080304	0.989358	1798	1	Prkab2	0.048523	0.08087	0.987813	1798	1
Slc6a12	6	0.044029	0.077824	0.976864	1799	1	Magi1	0.056412	0.080344	0.989358	1799	1	Olfr342	0.048557	0.080925	0.987813	1799	2
Trim9	6	0.044074	0.077894	0.976864	1800	2	Armc8	0.056457	0.08038	0.989358	1800	1	Cirh1a	0.048557	0.080925	0.987813	1800	2
Fam69b	6	0.044075	0.077898	0.976864	1801	1	mmu-mir-5118	0.056477	0.080401	0.989358	1801	1	Olfr140	0.048557	0.080925	0.987813	1801	2
Uck1	6	0.044118	0.077957	0.976864	1802	2	Krt84	0.056503	0.080423	0.989358	1802	1	Impa2	0.048557	0.080925	0.987813	1802	2
Bves	6	0.044121	0.077962	0.976864	1803	1	Hhipl2	0.056548	0.08046	0.989358	1803	1	Aldh1a1	0.048557	0.080925	0.987813	1803	2
Mthfs	4	0.044133	0.077983	0.976864	1804	1	NonTargetingControlGuideForMouse_0628	0.056565	0.080475	0.989358	1804	0	Hoxa9	0.048557	0.080925	0.987813	1804	2
Uty	6	0.044272	0.078177	0.976864	1805	2	Pmepa1	0.056684	0.080572	0.989358	1805	1	Zfr2	0.048557	0.080925	0.987813	1805	2
Zfp787	6	0.044349	0.078295	0.976864	1806	2	Gnas	0.05673	0.080606	0.989358	1806	1	Ctnnbl1	0.048557	0.080925	0.987813	1806	2
Mettl13	6	0.044351	0.078299	0.976864	1807	1	R3hdm4	0.056775	0.080649	0.989358	1807	1	mmu-mir-3059	0.048583	0.080963	0.987813	1807	1
Rpn2	6	0.044351	0.078299	0.976864	1808	1	Pttg1	0.058387	0.081967	0.989358	1808	1	1700007K13Rik	0.048614	0.081009	0.987813	1808	1
Lats2	6	0.044351	0.078299	0.976864	1809	1	Cd33	0.058387	0.081967	0.989358	1809	1	Drg1	0.04866	0.081083	0.987813	1809	1
Igsf11	6	0.044351	0.078299	0.976864	1810	1	Clec16a	0.058387	0.081967	0.989358	1810	1	Noto	0.048706	0.081157	0.987813	1810	1
Ptgdr	6	0.044351	0.078299	0.976864	1811	1	Gsn	0.058387	0.081967	0.989358	1811	1	Fam69b	0.048751	0.081221	0.987813	1811	1
Rsph4a	6	0.044351	0.078299	0.976864	1812	1	Mfsd11	0.058387	0.081967	0.989358	1812	1	Trmt61a	0.048797	0.081287	0.987813	1812	1
Pcdhb14	6	0.044351	0.078299	0.976864	1813	1	1700016D06Rik	0.058387	0.081967	0.989358	1813	1	Ceacam16	0.048843	0.081372	0.987813	1813	1
Olfr1283	6	0.044426	0.078411	0.977608	1814	2	Olfr1085	0.058387	0.081967	0.989358	1814	1	mmu-mir-718	0.048889	0.081442	0.987813	1814	1
Serpinb3b	5	0.044479	0.078489	0.977608	1815	1	Dcun1d3	0.058387	0.081967	0.989358	1815	1	Ptx4	0.048894	0.081452	0.987813	1815	2
Fau	6	0.044481	0.078491	0.977608	1816	2	Rpp40	0.058387	0.081967	0.989358	1816	1	Gm6289	0.048934	0.081511	0.987813	1816	2
Ccdc91	6	0.044534	0.078573	0.977608	1817	1	Tmem150b	0.058387	0.081967	0.989358	1817	1	Rcor1	0.048946	0.081522	0.987813	1817	2
Gprin1	6	0.044536	0.078575	0.977608	1818	2	4930578C19Rik	0.058387	0.081967	0.989358	1818	1	Gml	0.049012	0.081625	0.987813	1818	1
Wnt16	6	0.04458	0.07864	0.977877	1819	1	Zfand2a	0.058387	0.081967	0.989358	1819	1	Leprotl1	0.049015	0.081628	0.987813	1819	2
Ndufb5	6	0.04481	0.078986	0.980901	1820	1	Olfr24	0.058387	0.081967	0.989358	1820	1	Hdac8	0.04906	0.081695	0.987813	1820	2
AA792892	5	0.044824	0.079008	0.980901	1821	1	Psmd11	0.058387	0.081967	0.989358	1821	1	Faim3	0.049118	0.081782	0.987813	1821	2
Nme9	6	0.044834	0.079024	0.980901	1822	2	Rab1	0.058387	0.081967	0.989358	1822	1	Lrrc6	0.049141	0.081823	0.987813	1822	2
Mup5	6	0.044868	0.079075	0.980901	1823	2	Cir1	0.058387	0.081967	0.989358	1823	1	Tnrc18	0.049267	0.082015	0.987813	1823	2
Olfr823	6	0.04489	0.079109	0.980901	1824	2	Smarce1	0.058387	0.081967	0.989358	1824	1	Hyal6	0.049348	0.082137	0.987813	1824	2
Cldn1	6	0.044948	0.079201	0.980901	1825	2	Macrod2	0.058387	0.081967	0.989358	1825	1	Gm5800	0.049369	0.082165	0.987813	1825	1
mmu-mir-7647	4	0.045071	0.079396	0.980901	1826	1	Olfr196	0.058387	0.081967	0.989358	1826	1	Olfr1242	0.049369	0.082165	0.987813	1826	1
Cga	6	0.045084	0.079424	0.980901	1827	2	Dnaja1	0.058387	0.081967	0.989358	1827	1	Prpf39	0.049369	0.082165	0.987813	1827	1
Olfr1370	6	0.045131	0.07949	0.980901	1828	1	Snapin	0.058387	0.081967	0.989358	1828	1	Coq6	0.049369	0.082165	0.987813	1828	1
Rybp	6	0.045177	0.079557	0.980901	1829	2	Vmn2r53	0.058387	0.081967	0.989358	1829	1	Vstm2b	0.049369	0.082165	0.987813	1829	1
Hsd17b6	6	0.045189	0.079573	0.980901	1830	2	Plb1	0.058387	0.081967	0.989358	1830	1	1700003F12Rik	0.049369	0.082165	0.987813	1830	1
Pcp2	6	0.045223	0.079617	0.980901	1831	1	Olfr1510	0.058387	0.081967	0.989358	1831	1	Eif5b	0.049369	0.082165	0.987813	1831	1
Ccdc11	6	0.045267	0.079677	0.980901	1832	2	H2afx	0.058387	0.081967	0.989358	1832	1	Rnf17	0.049369	0.082165	0.987813	1832	1
Muc13	6	0.045422	0.079895	0.980901	1833	2	Stfa3	0.058387	0.081967	0.989358	1833	1	Mrps34	0.049369	0.082165	0.987813	1833	1
Cd3e	6	0.045433	0.079913	0.980901	1834	2	Lingo4	0.058387	0.081967	0.989358	1834	1	Trmt44	0.049369	0.082165	0.987813	1834	1
Klrk1	6	0.045445	0.079925	0.980901	1835	2	Hnrnpk	0.058387	0.081967	0.989358	1835	1	2310022A10Rik	0.049369	0.082165	0.987813	1835	1
Cdh8	6	0.045453	0.079936	0.980901	1836	1	Ctla2a	0.058387	0.081967	0.989358	1836	1	Mphosph8	0.049369	0.082165	0.987813	1836	1
Defb45	6	0.045636	0.080191	0.980901	1837	1	Cnot1	0.058387	0.081967	0.989358	1837	1	Exo1	0.049369	0.082165	0.987813	1837	1
Napsa	6	0.045682	0.080256	0.980901	1838	1	Ppapdc2	0.058387	0.081967	0.989358	1838	1	BC052040	0.049369	0.082165	0.987813	1838	1
Wdr48	6	0.04569	0.080268	0.980901	1839	2	Tifa	0.058387	0.081967	0.989358	1839	1	Tbk1	0.049369	0.082165	0.987813	1839	1
Phf11b	5	0.045744	0.080347	0.980901	1840	1	Cse1l	0.058387	0.081967	0.989358	1840	1	Rnf11	0.049369	0.082165	0.987813	1840	1
Hoxd3	6	0.04582	0.080453	0.980901	1841	1	Mettl4	0.058387	0.081967	0.989358	1841	1	Dnaaf3	0.049394	0.082208	0.987813	1841	2
2310002J15Rik	6	0.045823	0.080458	0.980901	1842	2	Sirpb1a	0.058387	0.081967	0.989358	1842	1	Rbms2	0.049497	0.082375	0.987813	1842	2
Vmn2r1	6	0.045865	0.080518	0.980901	1843	1	Zfp90	0.058387	0.081967	0.989358	1843	1	NonTargetingControlGuideForMouse_0134	0.049498	0.082376	0.987813	1843	1
mmu-mir-8092	4	0.045884	0.080552	0.980901	1844	1	Nfkbia	0.058387	0.081967	0.989358	1844	1	Serpine1	0.049532	0.082428	0.987813	1844	2
Cdh2	6	0.045957	0.080651	0.980901	1845	1	Meis1	0.058387	0.081967	0.989358	1845	1	Stx3	0.049664	0.082621	0.987813	1845	2
Dlgap4	6	0.04598	0.080678	0.980901	1846	2	Ncapd3	0.058387	0.081967	0.989358	1846	1	Fam213b	0.049682	0.082649	0.987813	1846	2
Ubap2l	6	0.045991	0.080693	0.980901	1847	2	Odf4	0.058387	0.081967	0.989358	1847	1	Cog3	0.049785	0.082815	0.987813	1847	2
Arrdc4	6	0.046003	0.080713	0.980901	1848	1	Yipf1	0.058387	0.081967	0.989358	1848	1	Gpr63	0.049797	0.082836	0.987813	1848	2
Map3k11	6	0.046013	0.080734	0.980901	1849	2	Grb2	0.058387	0.081967	0.989358	1849	1	Osr1	0.049878	0.082955	0.987813	1849	2
NonTargetingControlGuideForMouse_0505	1	0.046032	0.080768	0.980901	1850	1	Kif9	0.058387	0.081967	0.989358	1850	1	Tmtc4	0.049912	0.083003	0.987813	1850	2
6430550D23Rik	6	0.046036	0.080774	0.980901	1851	2	Tsta3	0.058387	0.081967	0.989358	1851	1	Golt1a	0.049924	0.083023	0.987813	1851	2
Vmn1r212	6	0.046047	0.080792	0.980901	1852	2	Cbln1	0.058387	0.081967	0.989358	1852	1	Taf2	0.04994	0.083047	0.987813	1852	1
Kdm7a	6	0.046049	0.080794	0.980901	1853	1	Pcdha2	0.058639	0.082176	0.989358	1853	1	Tcf25	0.049986	0.083114	0.987813	1853	1
Olfr1020	6	0.046095	0.080858	0.980901	1854	1	NonTargetingControlGuideForMouse_0031	0.058839	0.082331	0.989358	1854	0	Rgs13	0.050011	0.083152	0.987813	1854	2
Mlkl	6	0.046204	0.081009	0.980901	1855	2	Chil6	0.059906	0.083223	0.989358	1855	1	Rims1	0.050011	0.083152	0.987813	1855	2
Cdyl	6	0.046232	0.081048	0.980901	1856	1	Wdr63	0.059951	0.08326	0.989358	1856	1	NonTargetingControlGuideForMouse_0656	0.050023	0.083165	0.987813	1856	1
Esp8	6	0.046237	0.081058	0.980901	1857	2	Tmx2	0.060042	0.083336	0.989358	1857	1	Lypd8	0.050123	0.083322	0.987813	1857	1
Cyb561	6	0.046271	0.081109	0.980901	1858	2	Slc6a12	0.060087	0.083382	0.989358	1858	1	Map3k4	0.050126	0.083328	0.987813	1858	2
Vmn1r180	6	0.046324	0.081176	0.980901	1859	1	Mei1	0.060132	0.083423	0.989358	1859	1	Golga4	0.050169	0.083388	0.987813	1859	1
Map2k3	6	0.04637	0.081241	0.980901	1860	1	Cd34	0.060177	0.08346	0.989358	1860	1	Arap3	0.050215	0.083454	0.987813	1860	1
Ccdc53	6	0.046383	0.081262	0.980901	1861	2	Golgb1	0.060223	0.083493	0.989358	1861	1	Zfp27	0.05026	0.08352	0.987813	1861	1
Lpcat2	6	0.046394	0.081285	0.980901	1862	2	Cd40lg	0.060313	0.083575	0.989358	1862	1	E2f6	0.050329	0.083626	0.987813	1862	2
Trpv6	6	0.04645	0.08136	0.980901	1863	2	Hist1h3i	0.060379	0.083629	0.989358	1863	1	Gbe1	0.050329	0.083626	0.987813	1863	2
Olfr652	6	0.046462	0.081374	0.980901	1864	2	Zfp322a	0.060404	0.083656	0.989358	1864	1	Prss3	0.050329	0.083626	0.987813	1864	2
Zmym2	6	0.046484	0.081409	0.980901	1865	2	Igsf9b	0.060449	0.083697	0.989358	1865	1	2210016F16Rik	0.050329	0.083626	0.987813	1865	2
Iqch	6	0.046507	0.081439	0.980901	1866	1	Serpind1	0.060494	0.083734	0.989358	1866	1	St18	0.050352	0.083664	0.987813	1866	1
Olfr1489	6	0.046518	0.081452	0.980901	1867	2	NonTargetingControlGuideForMouse_0831	0.0605	0.08374	0.989358	1867	0	Rpl31-ps12	0.050397	0.083737	0.987813	1867	1
Pcdhga1	2	0.046547	0.081484	0.980901	1868	1	NonTargetingControlGuideForMouse_0110	0.060524	0.083763	0.989358	1868	0	NonTargetingControlGuideForMouse_0649	0.050412	0.083762	0.987813	1868	1
Otud6a	6	0.046562	0.081496	0.980901	1869	2	4930474N05Rik	0.060585	0.083804	0.989358	1869	1	Calm2	0.050443	0.083811	0.987813	1869	1
Rasal1	6	0.046599	0.081542	0.980901	1870	1	NonTargetingControlGuideForMouse_0497	0.060651	0.083855	0.989358	1870	0	Bcl7a	0.050489	0.083894	0.987813	1870	1
Vmn1r222	6	0.046607	0.081555	0.980901	1871	2	St6galnac1	0.060698	0.083894	0.989358	1871	1	Shisa2	0.050534	0.083966	0.987813	1871	1
Arhgap4	6	0.046619	0.081569	0.980901	1872	2	Olfr1145	0.060766	0.083952	0.989358	1872	1	Rhox6	0.05058	0.084034	0.987813	1872	1
Xrcc2	6	0.046691	0.081666	0.980901	1873	1	Olfr198	0.060811	0.083986	0.989358	1873	1	Gapdh	0.050613	0.084083	0.987813	1873	2
Cep63	6	0.04672	0.081707	0.980901	1874	2	NonTargetingControlGuideForMouse_0914	0.060866	0.084028	0.989358	1874	0	Psmb6	0.050613	0.084083	0.987813	1874	2
Pde6a	6	0.046754	0.081757	0.980901	1875	2	Olfr1062	0.060947	0.084097	0.989358	1875	1	Paip2	0.050613	0.084083	0.987813	1875	2
Adcyap1	6	0.046782	0.0818	0.980901	1876	1	Rpl17	0.060992	0.084132	0.989358	1876	1	Slc46a2	0.050671	0.084161	0.987813	1876	1
Syce2	6	0.046828	0.081865	0.980901	1877	1	Prss48	0.061038	0.084166	0.989358	1877	1	Abhd11	0.050717	0.084241	0.987813	1877	1
Olfr1046	6	0.046838	0.08188	0.980901	1878	2	Alox12	0.061083	0.084205	0.989358	1878	1	Usp11	0.050764	0.084309	0.987813	1878	2
Sdr16c6	6	0.046855	0.081899	0.980901	1879	2	Commd1	0.061128	0.084242	0.989358	1879	1	Taar8a	0.050764	0.084309	0.987813	1879	2
Mreg	6	0.0469	0.081978	0.980901	1880	2	Ccnt2	0.061173	0.084275	0.989358	1880	1	Lrrc56	0.050808	0.084366	0.987813	1880	1
Crebzf	6	0.046917	0.082007	0.980901	1881	2	Npas3	0.061264	0.084345	0.989358	1881	1	Vgll1	0.050852	0.084425	0.987813	1881	2
Dhps	6	0.046966	0.08208	0.980901	1882	1	mmu-mir-668	0.061323	0.084389	0.989358	1882	1	Kcnj16	0.0509	0.084502	0.987813	1882	1
Wdr54	6	0.047012	0.082137	0.980901	1883	1	Tmem192	0.061535	0.084561	0.989358	1883	1	Pomgnt2	0.050922	0.084533	0.987813	1883	2
Prf1	6	0.047024	0.082154	0.980901	1884	2	Cnst	0.061535	0.084561	0.989358	1884	1	Kif1b	0.050945	0.08457	0.987813	1884	1
Mrgpra4	6	0.047057	0.082203	0.980901	1885	1	Ankle2	0.061535	0.084561	0.989358	1885	1	Slc25a45	0.05098	0.084618	0.987813	1885	2
Sgms2	6	0.047103	0.082274	0.980901	1886	1	Mfn2	0.061535	0.084561	0.989358	1886	1	Adamtsl4	0.050991	0.084637	0.987813	1886	1
Nsun2	6	0.047149	0.082352	0.980901	1887	1	Hif3a	0.061535	0.084561	0.989358	1887	1	Palb2	0.051015	0.084678	0.987813	1887	2
Sstr4	6	0.047159	0.082364	0.980901	1888	2	Slc30a3	0.061535	0.084561	0.989358	1888	1	Nme9	0.051037	0.084713	0.987813	1888	1
Nmur2	6	0.047241	0.082478	0.980901	1889	1	NonTargetingControlGuideForMouse_0124	0.061693	0.084681	0.989358	1889	0	B9d2	0.051061	0.084754	0.987813	1889	2
Rerg	6	0.047286	0.08254	0.980901	1890	1	Rhcg	0.061852	0.084815	0.989358	1890	1	NonTargetingControlGuideForMouse_0540	0.051064	0.084757	0.987813	1890	1
Epb4.1l2	6	0.047329	0.082608	0.980901	1891	2	Kdm5b	0.061897	0.08485	0.989358	1891	1	Slc6a12	0.051082	0.084789	0.987813	1891	1
BC018242	6	0.04734	0.082625	0.980901	1892	2	Nedd4l	0.061942	0.084885	0.989358	1892	1	Vps45	0.051128	0.084867	0.987813	1892	1
Mafb	6	0.047352	0.08264	0.980901	1893	2	Olfr138	0.061988	0.084917	0.989358	1893	1	2810417H13Rik	0.051155	0.08491	0.987813	1893	2
Ank2	6	0.047374	0.082681	0.980901	1894	2	Tmem150a	0.062033	0.084956	0.989358	1894	1	Ccdc136	0.051174	0.084942	0.987813	1894	1
2210407C18Rik	6	0.047424	0.082748	0.980901	1895	1	Fndc3c1	0.062078	0.084991	0.989358	1895	1	P2ry13	0.051178	0.08495	0.987813	1895	2
Bsn	6	0.047499	0.082854	0.980901	1896	2	Vmn2r12	0.062123	0.085031	0.989358	1896	1	Pcdh15	0.051213	0.085	0.987813	1896	2
Sval3	6	0.047515	0.082873	0.980901	1897	2	Ddah2	0.062169	0.085067	0.989358	1897	1	Muc5ac	0.05126	0.085077	0.987813	1897	2
Ap5m1	6	0.047561	0.082943	0.980901	1898	1	Ppp1r21	0.062259	0.085131	0.989358	1898	1	P2ry10	0.051265	0.085086	0.987813	1898	1
Cyp2b13	6	0.047578	0.082971	0.980901	1899	2	Efcab4b	0.062395	0.085244	0.989358	1899	1	Trip12	0.051295	0.085138	0.987813	1899	2
Mid1	6	0.047601	0.083002	0.980901	1900	2	Trim46	0.06244	0.085272	0.989358	1900	1	Sgsh	0.051311	0.085168	0.987813	1900	1
Palm3	6	0.047607	0.083007	0.980901	1901	1	NonTargetingControlGuideForMouse_0517	0.062464	0.085283	0.989358	1901	0	Fgf23	0.051356	0.085231	0.987813	1901	1
Exoc8	6	0.047653	0.083075	0.980901	1902	1	Rogdi	0.062485	0.085299	0.989358	1902	1	Rab33b	0.051402	0.085297	0.987813	1902	1
Rhoc	6	0.047669	0.083097	0.980901	1903	2	Zbtbd6	0.06253	0.085332	0.989358	1903	1	Tas1r3	0.051412	0.085308	0.987813	1903	2
Il23r	6	0.047697	0.083137	0.980901	1904	2	Pla2g12b	0.062575	0.085369	0.989358	1904	1	H2-T24	0.051448	0.08536	0.987813	1904	1
Prkd1	6	0.047714	0.083168	0.980901	1905	2	Rasal1	0.062666	0.085435	0.989358	1905	1	Chic2	0.051505	0.08546	0.987813	1905	2
Pabpc2	6	0.047744	0.083218	0.980901	1906	1	Sptb	0.062711	0.085472	0.989358	1906	1	Cdk5rap2	0.051564	0.085546	0.987813	1906	2
Trmt2b	6	0.047873	0.083394	0.980901	1907	2	Dnajb8	0.062801	0.085547	0.989358	1907	1	Hnrnpm	0.051564	0.085546	0.987813	1907	2
Emilin2	6	0.047882	0.083405	0.980901	1908	1	Casd1	0.062937	0.085657	0.989358	1908	1	Aldh1l2	0.051634	0.085652	0.987813	1908	2
Sox9	6	0.047928	0.083477	0.980901	1909	1	Fam53c	0.063027	0.085731	0.989358	1909	1	Olfr1494	0.051657	0.085687	0.987813	1909	2
Zfp692	6	0.04793	0.08348	0.980901	1910	2	Cxcl10	0.063118	0.085805	0.989358	1910	1	Olfr812	0.051704	0.08575	0.987813	1910	2
Tmem190	6	0.047964	0.083523	0.980901	1911	2	Cyp2j13	0.063163	0.085839	0.989358	1911	1	Gm11487	0.051763	0.085828	0.987813	1911	2
mmu-mir-363	4	0.048001	0.083568	0.980901	1912	1	Slitrk1	0.063298	0.08594	0.989358	1912	1	9030624J02Rik	0.051845	0.085957	0.987813	1912	2
Fam46a	6	0.048019	0.083596	0.980901	1913	1	Mtmr14	0.063389	0.086025	0.989358	1913	1	1700013H16Rik	0.051857	0.085975	0.987813	1913	2
Adk	6	0.048061	0.083654	0.980901	1914	2	Mid1	0.063434	0.086068	0.989358	1914	1	Apoa1bp	0.051868	0.085998	0.987813	1914	2
Clgn	6	0.048061	0.083654	0.980901	1915	2	E2f8	0.063479	0.086109	0.989358	1915	1	Trim34a	0.051949	0.08611	0.987813	1915	1
Trim71	6	0.048065	0.083661	0.980901	1916	1	Tbc1d17	0.063569	0.086182	0.989358	1916	1	Apol10a	0.051951	0.086114	0.987813	1916	2
Gimap1	6	0.048156	0.08379	0.980901	1917	1	Kbtbd2	0.063614	0.086217	0.989358	1917	1	Olfr666	0.052009	0.086207	0.987813	1917	2
Cyc1	6	0.048248	0.083919	0.980901	1918	1	Slc5a1	0.06384	0.086398	0.989358	1918	1	Phc3	0.052018	0.086227	0.987813	1918	1
Tbccd1	6	0.04826	0.083935	0.980901	1919	2	NonTargetingControlGuideForMouse_0768	0.063871	0.086414	0.989358	1919	0	Tmem63a	0.052018	0.086227	0.987813	1919	1
Bpifa6	6	0.048283	0.083969	0.980901	1920	2	Sgol1	0.063931	0.086461	0.989358	1920	1	Clec12a	0.052018	0.086227	0.987813	1920	1
Frmpd1	6	0.048294	0.083986	0.980901	1921	1	Cry1	0.063976	0.086498	0.989358	1921	1	Srsf5	0.052018	0.086227	0.987813	1921	1
Dip2a	6	0.048311	0.084019	0.980901	1922	2	Spdef	0.064066	0.086566	0.989358	1922	1	4930430F08Rik	0.052018	0.086227	0.987813	1922	1
Ift46	6	0.048363	0.084084	0.980901	1923	2	Nupl1	0.064111	0.086595	0.989358	1923	1	Gm15455	0.052018	0.086227	0.987813	1923	1
Larp4b	6	0.048385	0.084107	0.980901	1924	2	Maea	0.064156	0.086633	0.989358	1924	1	Cenpn	0.052018	0.086227	0.987813	1924	1
Ankrd26	6	0.048385	0.084107	0.980901	1925	2	Tagap	0.064201	0.086671	0.989358	1925	1	Olfr683	0.052018	0.086227	0.987813	1925	1
Plcxd2	6	0.048408	0.084139	0.980901	1926	2	Apoa2	0.064246	0.086706	0.989358	1926	1	Ano7	0.052018	0.086227	0.987813	1926	1
Fam178b	6	0.048431	0.084178	0.980901	1927	2	Ndufaf2	0.064292	0.086752	0.989358	1927	1	Serp1	0.052018	0.086227	0.987813	1927	1
Fam175b	6	0.048431	0.084178	0.980901	1928	1	Vmn1r40	0.064337	0.086795	0.989358	1928	1	Eftud2	0.052018	0.086227	0.987813	1928	1
mmu-mir-1187	2	0.048447	0.0842	0.980901	1929	1	Gne	0.064472	0.086901	0.989358	1929	1	Sh2d2a	0.052018	0.086227	0.987813	1929	1
Vmn2r114	6	0.048477	0.084238	0.980901	1930	1	Grid2ip	0.064607	0.087016	0.989358	1930	1	Pou6f2	0.052018	0.086227	0.987813	1930	1
Olfr1028	6	0.048511	0.08428	0.980901	1931	2	Mxd1	0.064653	0.087051	0.989358	1931	1	Pask	0.052018	0.086227	0.987813	1931	1
Vmn1r62	4	0.048537	0.08432	0.980901	1932	1	Grasp	0.064698	0.087091	0.989358	1932	1	Pgm3	0.052018	0.086227	0.987813	1932	1
Dap3	6	0.048568	0.084366	0.980901	1933	1	mmu-mir-6991	0.064715	0.0871	0.989358	1933	1	Adam34	0.052068	0.086298	0.987813	1933	2
Cgnl1	6	0.048602	0.084414	0.980901	1934	2	Pds5a	0.064743	0.087126	0.989358	1934	1	Comt	0.05215	0.086437	0.987813	1934	2
1700001C19Rik	6	0.048614	0.084429	0.980901	1935	1	Mfsd7a	0.064788	0.08717	0.989358	1935	1	mmu-mir-7665	0.052223	0.086533	0.987813	1935	1
Htr2a	6	0.04866	0.084495	0.980901	1936	2	Crybg3	0.064878	0.087242	0.989358	1936	1	Zfp217	0.052291	0.086628	0.987813	1936	2
Ipcef1	6	0.048705	0.08455	0.980901	1937	2	Ncln	0.064923	0.087272	0.989358	1937	1	NonTargetingControlGuideForMouse_0958	0.052344	0.086699	0.987813	1937	1
mmu-mir-675	4	0.048705	0.08455	0.980901	1938	1	Sumo1	0.064968	0.087304	0.989358	1938	1	Olfr951	0.05235	0.086709	0.987813	1938	2
Olfr1276	6	0.048706	0.08455	0.980901	1939	1	NonTargetingControlGuideForMouse_0225	0.065008	0.087342	0.989358	1939	0	Slc22a20	0.052386	0.086759	0.987813	1939	2
Rbm38	6	0.048717	0.084563	0.980901	1940	2	Rab11b	0.065013	0.087347	0.989358	1940	1	Plekhf1	0.052397	0.086772	0.987813	1940	2
Usp17la	5	0.048726	0.084578	0.980901	1941	1	Uhrf1bp1	0.065059	0.08738	0.989358	1941	1	Snx33	0.052421	0.086808	0.987813	1941	2
Ptgfr	6	0.048751	0.084614	0.980901	1942	2	Ust	0.065126	0.087437	0.989358	1942	1	Lamp1	0.052439	0.086842	0.987813	1942	2
3110035E14Rik	6	0.048751	0.084614	0.980901	1943	1	Dlx4	0.065194	0.087497	0.989358	1943	1	Asic1	0.052456	0.086871	0.987813	1943	2
Gm10267	6	0.048797	0.08468	0.980901	1944	1	Epas1	0.065284	0.087567	0.989358	1944	1	Sec63	0.052539	0.086983	0.987813	1944	2
NonTargetingControlGuideForMouse_0768	1	0.048854	0.084758	0.980901	1945	1	Gchfr	0.065329	0.087604	0.989358	1945	1	Gm6927	0.052539	0.086983	0.987813	1945	2
2310039H08Rik	6	0.048889	0.084813	0.980901	1946	1	Prss52	0.065374	0.087639	0.989358	1946	1	Dtnb	0.052574	0.087035	0.987813	1946	2
Idi1	6	0.048934	0.084876	0.980901	1947	2	mmu-mir-466m	0.065377	0.087641	0.989358	1947	1	Alk	0.052586	0.087054	0.987813	1947	2
Rpl5	6	0.048946	0.084886	0.980901	1948	2	Ece2	0.065419	0.087673	0.989358	1948	1	Grk1	0.052634	0.08713	0.987813	1948	1
Ttc16	6	0.048946	0.084886	0.980901	1949	2	Tmbim1	0.065464	0.087715	0.989358	1949	1	Epn2	0.052657	0.087167	0.987813	1949	2
Reg4	6	0.048946	0.084886	0.980901	1950	2	Krtap14	0.065554	0.087786	0.989358	1950	1	Npy	0.052679	0.087198	0.987813	1950	1
Ppfia2	6	0.048946	0.084886	0.980901	1951	2	Ccdc136	0.0656	0.087819	0.989358	1951	1	D10Bwg1379e	0.052716	0.08726	0.987813	1951	2
Spire1	6	0.048946	0.084886	0.980901	1952	2	Cpeb4	0.065735	0.087915	0.989358	1952	1	C1rl	0.052728	0.087281	0.987813	1952	2
Phox2b	6	0.048946	0.084886	0.980901	1953	2	Mau2	0.06578	0.087945	0.989358	1953	1	Stxbp5	0.05277	0.087335	0.987813	1953	1
Araf	6	0.048946	0.084886	0.980901	1954	2	Ccar1	0.065825	0.087983	0.989358	1954	1	Nppa	0.052862	0.087464	0.987813	1954	1
Fam69c	6	0.048946	0.084886	0.980901	1955	2	Rims2	0.06587	0.088017	0.989358	1955	1	Gm1993	0.05292	0.087542	0.987813	1955	1
Gkn2	6	0.04898	0.084926	0.980901	1956	1	Cyp3a57	0.065915	0.088056	0.989358	1956	1	Emb	0.052946	0.087592	0.987813	1956	2
Srpk1	6	0.049026	0.084994	0.980901	1957	1	Mbd2	0.066005	0.088141	0.989358	1957	1	Ipo7	0.052946	0.087592	0.987813	1957	2
Soat1	6	0.049072	0.085058	0.980901	1958	1	Aff2	0.06605	0.088179	0.989358	1958	1	Irgm2	0.052946	0.087592	0.987813	1958	2
NonTargetingControlGuideForMouse_0732	1	0.049108	0.08511	0.980901	1959	1	Zc3h14	0.06614	0.088262	0.989358	1959	1	Cp	0.052946	0.087592	0.987813	1959	2
Patl1	6	0.049112	0.085114	0.980901	1960	2	Olfr250	0.066185	0.088295	0.989358	1960	1	Ddx31	0.052946	0.087592	0.987813	1960	2
Tpbg	6	0.049117	0.085122	0.980901	1961	1	Cog7	0.066275	0.088368	0.989358	1961	1	4930548H24Rik	0.052946	0.087592	0.987813	1961	2
Evi5	6	0.049175	0.08522	0.980901	1962	2	Cyc1	0.066321	0.088408	0.989358	1962	1	Naa20	0.052946	0.087592	0.987813	1962	2
Dnmt3l	6	0.049209	0.085255	0.980901	1963	1	Ppp1r17	0.066366	0.088445	0.989358	1963	1	Ms4a6c	0.052946	0.087592	0.987813	1963	2
Kdm4c	6	0.04921	0.085256	0.980901	1964	2	Bpgm	0.066411	0.088481	0.989358	1964	1	Mrm1	0.052946	0.087592	0.987813	1964	2
Hoxc9	6	0.049255	0.08532	0.980901	1965	1	NonTargetingControlGuideForMouse_0792	0.066526	0.088577	0.989358	1965	0	Ercc4	0.052998	0.087666	0.987813	1965	1
Retnlb	6	0.049323	0.085413	0.980901	1966	1	Epc2	0.066546	0.088595	0.989358	1966	1	Zfyve1	0.053044	0.087736	0.987813	1966	1
Trim61	6	0.049323	0.085413	0.980901	1967	1	Glra3	0.066591	0.088624	0.989358	1967	1	8030423J24Rik	0.05309	0.087796	0.987813	1967	1
Camkv	6	0.049325	0.085417	0.980901	1968	2	Ceacam3	0.066816	0.088811	0.989358	1968	1	Tysnd1	0.053124	0.087844	0.987813	1968	2
mmu-mir-466l	3	0.049332	0.085427	0.980901	1969	1	L1cam	0.066906	0.088888	0.989358	1969	1	Irx2	0.053135	0.087863	0.987813	1969	1
9230112D13Rik	6	0.049392	0.085519	0.980901	1970	1	Vps13c	0.066951	0.088922	0.989358	1970	1	Anxa3	0.053181	0.087933	0.987813	1970	1
Ccno	6	0.049483	0.085656	0.980901	1971	1	Erap1	0.066996	0.088957	0.989358	1971	1	NonTargetingControlGuideForMouse_0519	0.053195	0.087955	0.987813	1971	1
Tmem138	6	0.049566	0.085785	0.980901	1972	2	Nhlh2	0.067131	0.089064	0.989358	1972	1	Apod	0.053225	0.087996	0.987813	1972	2
Ostm1	6	0.049575	0.0858	0.980901	1973	1	Tktl2	0.067176	0.089099	0.989358	1973	1	Mbl2	0.053226	0.087999	0.987813	1973	1
Mocs3	6	0.04962	0.085866	0.980901	1974	1	Fgf14	0.067221	0.08914	0.989358	1974	1	Abca17	0.053272	0.088062	0.987813	1974	1
mmu-mir-721	4	0.049624	0.085871	0.980901	1975	1	Peg12	0.067266	0.089174	0.989358	1975	1	Dph7	0.053272	0.088063	0.987813	1975	2
Slc1a6	6	0.049666	0.085927	0.980901	1976	2	Adamdec1	0.067311	0.089204	0.989358	1976	1	Gprin3	0.053308	0.088117	0.987813	1976	2
Olfr1019	6	0.049693	0.085965	0.980901	1977	2	Lsm10	0.067356	0.089245	0.989358	1977	1	Zbtb26	0.053317	0.088133	0.987813	1977	1
Cxcl10	6	0.049712	0.085992	0.980901	1978	1	Ninj2	0.067401	0.089279	0.989358	1978	1	Elovl5	0.053363	0.088196	0.987813	1978	1
Snx7	6	0.049716	0.085998	0.980901	1979	2	Tesc	0.067446	0.089315	0.989358	1979	1	Brsk1	0.053367	0.088205	0.987813	1979	2
Olfr1231	6	0.049745	0.086049	0.980901	1980	2	NonTargetingControlGuideForMouse_0732	0.067464	0.089331	0.989358	1980	0	Nanos1	0.053367	0.088205	0.987813	1980	2
Adh7	6	0.049757	0.086067	0.980901	1981	2	Psmg4	0.067491	0.089348	0.989358	1981	1	Lrig1	0.053402	0.088267	0.987813	1981	2
Klra9	5	0.049795	0.086115	0.980901	1982	1	NonTargetingControlGuideForMouse_0656	0.067512	0.089362	0.989358	1982	0	Poc1a	0.053438	0.088315	0.987813	1982	2
Rnf186	6	0.049809	0.086135	0.980901	1983	2	Trim10	0.067536	0.08938	0.989358	1983	1	mmu-mir-206	0.053505	0.088406	0.987813	1983	1
Tymp	6	0.049849	0.086194	0.980901	1984	1	Hbb-bt	0.067545	0.089389	0.989358	1984	1	Ttll13	0.053509	0.088411	0.987813	1984	2
Entpd4	6	0.049895	0.086259	0.980901	1985	1	4632434I11Rik	0.067581	0.08942	0.989358	1985	1	Nfib	0.053682	0.088608	0.987813	1985	1
Ppp1r1a	6	0.04994	0.086317	0.980901	1986	1	Lmbrd2	0.067626	0.089458	0.989358	1986	1	Olfr103	0.053773	0.088685	0.987813	1986	1
Aamdc	6	0.049982	0.086377	0.980901	1987	2	Ccdc171	0.067671	0.0895	0.989358	1987	1	Sftpb	0.053819	0.088715	0.987813	1987	1
Hapln1	6	0.050028	0.086441	0.980901	1988	2	Ago3	0.067716	0.089535	0.989358	1988	1	Crebl2	0.053864	0.088751	0.987813	1988	1
Gbp3	6	0.050032	0.086444	0.980901	1989	1	Cldn8	0.067806	0.089619	0.989358	1989	1	Gbp3	0.05391	0.088782	0.987813	1989	1
Lrit3	6	0.050074	0.086507	0.980901	1990	2	Jak2	0.067851	0.089655	0.989358	1990	1	Pced1b	0.053955	0.088816	0.987813	1990	1
Clk4	6	0.050144	0.086611	0.980901	1991	2	Rgs5	0.067896	0.089693	0.989358	1991	1	Ticrr	0.054001	0.088857	0.987813	1991	1
Hecw2	6	0.050167	0.086647	0.980901	1992	2	Vmn1r74	0.067941	0.08974	0.989358	1992	1	mmu-mir-6398	0.054024	0.08888	0.987813	1992	1
Cyp2c54	6	0.050215	0.086719	0.980901	1993	2	Xpc	0.067986	0.089772	0.989358	1993	1	Fam115a	0.054092	0.088921	0.987813	1993	1
Strip2	6	0.050248	0.086766	0.980901	1994	2	NonTargetingControlGuideForMouse_0048	0.068036	0.089807	0.989358	1994	0	Arhgap12	0.054137	0.088962	0.987813	1994	1
Ecscr	6	0.05026	0.086777	0.980901	1995	1	Dbr1	0.068098	0.089857	0.989358	1995	1	Ptpn21	0.054183	0.088999	0.987813	1995	1
Bbx	6	0.050317	0.086864	0.980901	1996	2	Atm	0.068166	0.089916	0.989358	1996	1	Plxna3	0.054228	0.089032	0.987813	1996	1
Spink4	6	0.050329	0.086881	0.980901	1997	2	4931431F19Rik	0.068211	0.089952	0.989358	1997	1	Ncf4	0.054274	0.089067	0.987813	1997	1
[truncated: 20,622 more rows]
