# Supplementary material for: Genome-wide CRISPR screen identifies noncanonical NF-κB signaling as a regulator of density-dependent proliferation
Source: eLife. 2020 Nov 13;9:e63603. doi: 10.7554/eLife.63603 (PMC7685705; doi:10.7554/eLife.63603)
Supplement: Figure 2—source data 1. [file elife-63603-fig2-data1.xlsx]

## Sheet: Figure2_Aquant
	NT	NF2 KO1	NF2 KO2
Repeat 1	1	0.011439	0.07788
Repeat 2	1	0.113256	0.090386
Repeat 3	1	0.154487	0.117392

## Sheet: Figure2_Bquant
	NT	TRAF3 KO1	TRAF3 KO2
Repeat 1	1	0.131242	0.290946
Repeat 2	1	0.08004	0.092894
Repeat 3	1	0.097285	0.572031

## Sheet: Figure2_Cquant
	NT	UBE2M KO1	UBE2M KO2
Repeat 1	1	0.04671	0.00675
Repeat 2	1	0.045265	0.008149
Repeat 3	1	0.140475	0.018304

## Sheet: Figure 2E
	NT	NF2 KO1	NF2 KO2	TRAF3 KO1	TRAF3 KO2	UBE2M KO1	UBE2M KO2
Repeat 1	55.1	58.6	65.5	62.3	59.6	51.5	55.6
Repeat 2	49.2	56.6	46.6	47	42.5	43.3	49.6
Repeat 3	56.6	60.3	53.5	51.3	54.8	51.5	51.2
Repeat 4	48.9	44.5	49.5	40	43.1	45.3	42.3

## Sheet: Figure 2F
	NT	NF2 KO1	NF2 KO2	TRAF3 KO1	TRAF3 KO2	UBE2M KO1	UBE2M KO2
Repeat 1	4.21	20.3	18	5.98	6.87	13.7	10.3
Repeat 2	3.89	11	18.7	11.2	11.7	13.9	10.8
Repeat 3	4.21	25.7	19.4	6.19	8.3	15.1	11
Repeat 4	5.3	25.9	21.6	10.8	9.3	10	9.2
Repeat 5	4.2	21.6	26.3	8.5	11.7	16	10.3
Repeat 6	3.9	21.9	20.5	9.3	9.2	11	11.1

## Sheet: Figure 2H
	NT	NF2 KO1	TRAF3 KO1	UBE2M KO1
Repeat 1 Field of view 1	0.018	10.648	7.045	1.788
Repeat 1 Field of view 2	0.149	9.836	1.993	2.228
Repeat 1 Field of view 3	0.109	7.094	3.971	1.523
Repeat 1 Field of view 4	0.096	16.011	6.799	1.446
Repeat 1 Field of view 5	0.031	11.256	3.892	1.718
Repeat 1 Field of view 6	0.095		9.689
Repeat 2 Field of view 1	0.047	3.614	3.216	0.177
Repeat 2 Field of view 2	0.123	6.109	6.328	0.447
Repeat 2 Field of view 3	0.009	1.876	1.573	0.068
Repeat 2 Field of view 4	0.008	8.325	2.429	0.393
Repeat 2 Field of view 5	0.041	6.105	1.19	0.59
Repeat 2 Field of view 6	0.024		15.665	0.935
Repeat 3 Field of view 1	0.753	50.932	7.726	13.439
Repeat 3 Field of view 2	1.694	32.443	15.053	4.646
Repeat 3 Field of view 3	1.961	63.669	13.476	10.219
Repeat 3 Field of view 4	2.016	27.353	11.501	9.583
Repeat 3 Field of view 5	1.959	33.04	8.397	12.7
Repeat 4 Field of view 1	0.181	18.455	7.426	5.837
Repeat 4 Field of view 2	0.44	39.183	7.127	2.293
Repeat 4 Field of view 3	0	49.102	11.378	10.28
Repeat 4 Field of view 4	0.258	24.886	8.014	17.7
Repeat 4 Field of view 5	1.399	24.887	12.431	4.24
