# Supplementary material for: Genome-wide CRISPR screen identifies noncanonical NF-κB signaling as a regulator of density-dependent proliferation
Source: eLife. 2020 Nov 13;9:e63603. doi: 10.7554/eLife.63603 (PMC7685705; doi:10.7554/eLife.63603)
Supplement: Figure 3—figure supplement 1—source data 1. [file elife-63603-fig3-figsupp1-data1.xlsx]

## Sheet: Figure_3-figure suppl_1Aquant
	MCF10a NT	MCF10a TRAF3 KO1	MCF10a TRAF3 KO2
Repeat 1	1	0.118857	0.423527
Repeat 2	1	0	0.401644
Repeat 3	1	0	0.453022

## Sheet: Figure_3-figure suppl_1B
	MCF10a NT	MCF10a TRAF3 KO1	MCF10a TRAF3 KO2
Repeat 1	4.9	7.2	12.6
Repeat 2	5.3	6.4	11.8
Repeat 3	1.7	5.4	10.4
Repeat 4	4.8	9.1	7.9
Repeat 5	4.4	6.5	8.6

## Sheet: Figure_3-figure suppl_1Cquant
	3T3 NT	3T3 TRAF3 KO1
Repeat 1	1	0.318267
Repeat 2	1	0.149432
Repeat 3	1	0.014714

## Sheet: Figure_3-figure supplement_1_D
	3T3 NT	3T3 TRAF3 KO1
Repeat 1	3.5	7.4
Repeat 2	5	5.9
Repeat 3	4.3	6.1
Repeat 4	4.4	7.3
Repeat 5	3.5	8.6
Repeat 6	2.8	9.7
