# Supplementary material for: Genome-wide CRISPR screen identifies noncanonical NF-κB signaling as a regulator of density-dependent proliferation
Source: eLife. 2020 Nov 13;9:e63603. doi: 10.7554/eLife.63603 (PMC7685705; doi:10.7554/eLife.63603)
Supplement: Figure 3—source data 1. [file elife-63603-fig3-data1.xlsx]

## Sheet: Figure 3C
	NT	TRAF3 KO1
Repeat 1 Organoid 1	2	9
Repeat 1 Organoid 2	3	4
Repeat 1 Organoid 3	2	4
Repeat 1 Organoid 4	4	4
Repeat 1 Organoid 5	2	12
Repeat 1 Organoid 6	7
Repeat 2 Organoid 1	4	11
Repeat 2 Organoid 2	1	11
Repeat 2 Organoid 3	6	12
Repeat 2 Organoid 4	6	6
Repeat 2 Organoid 5	0	14
Repeat 2 Organoid 6	2	14
Repeat 2 Organoid 7	1	5
Repeat 2 Organoid 8		6
Repeat 2 Organoid 9		7
Repeat 2 Organoid 10		22
Repeat 3 Organoid 1	1	19
Repeat 3 Organoid 2	4	8
Repeat 3 Organoid 3	4	17
Repeat 3 Organoid 4	3	14
Repeat 3 Organoid 5	7	9
Repeat 3 Organoid 6	2	5
Repeat 3 Organoid 7	5	32
Repeat 3 Organoid 8	7
