# Supplementary material for: Genome-wide CRISPR screen identifies noncanonical NF-κB signaling as a regulator of density-dependent proliferation
Source: eLife. 2020 Nov 13;9:e63603. doi: 10.7554/eLife.63603 (PMC7685705; doi:10.7554/eLife.63603)
Supplement: Figure 5—source data 1. [file elife-63603-fig5-data1.xlsx]

## Sheet: Figure_5Bquant
	NT NT	NT p100 KO	TRAF3 KO1 NT	TRAF3 KO1 p100 KO
Repeat 1	1	0.088227	0.792602	0.111427
Repeat 2	1	0.241429	1.02435	0.126241
Repeat 3	1	0.169964	1.33874	0.276652

## Sheet: Figure_5C
	NT NT	NT p100 KO	TRAF3 KO1 NT	TRAF3 KO1 p100 KO
Repeat 1	2.9	3	16.3	8.2
Repeat 2	4.24	3.26	15.5	9.1
Repeat 3	6.7	4.01	20	8.7
Repeat 4	4	2.7	12	9

## Sheet: Figure_5Equant
	NT	NT TRAF3 KO1	TRAF3 KO1 NIK1 KO1	TRAF3 KO1 NIK1 KO2
Repeat 1	0.159907	1	0.180641	0.313106
Repeat 2	0.036709	1	0	0.092821
Repeat 3	0.263083	1	0.213547	0.193131

## Sheet: Figure_5F
	NT	NT TRAF3 KO1	TRAF3 KO1 NIK1 KO1	TRAF3 KO1 NIK1 KO2
Repeat 1	2.2	25.6	7.6	8.5
Repeat 2	7.9	24.5	14.5	18.1
Repeat 3	10.7	17.9	9	8.6
Repeat 4	7.1	16.7	8.3	10
Repeat 5	10.6	18.3	9.1	7.9

## Sheet: Figure_5H
	NT DMSO	NT BV6 7 uM	TRAF3 KO1 DMSO	TRAF3 KO1 BV6 7 uM
Repeat 1	44.5	48.6	61.5	64.7
Repeat 2	50.1	41.9	43.6	61.6
Repeat 3	42.6	42.3	40.7	51.6
Repeat 4	45.9	42.8	42.1	38
Repeat 5	49.2	44.9	46.4	42.9

## Sheet: Figure_5I
	NT DMSO	NT BV6 7 uM	TRAF3 KO1 DMSO	TRAF3 KO1 BV6 7 uM
Repeat 1	2.3	6.8	9.2	21.5
Repeat 2	1.8	6.2	10.9	14.4
Repeat 3	3.3	10.8	19.4	27.1
Repeat 4	6.2	10.6	18.2	17.5
Repeat 5	5	17.7	20.6	20.6
Repeat 6	5.9	15.3	21.8	27

## Sheet: Figure_5K
	NT	NT NIK-ΔT3
Repeat 1	3.2	7.5
Repeat 2	4.6	9.6
Repeat 3	3.8	16.1
Repeat 4	2.8	17.9
Repeat 5	3.3	6.1
Repeat 6	2.9	5
