# Supplementary material for: Genome-wide CRISPR screen identifies noncanonical NF-κB signaling as a regulator of density-dependent proliferation
Source: eLife. 2020 Nov 13;9:e63603. doi: 10.7554/eLife.63603 (PMC7685705; doi:10.7554/eLife.63603)
Supplement: Figure 6—source data 1. [file elife-63603-fig6-data1.xlsx]

## Sheet: Figure_6B
IPA
	NT vs TRAF3 KO1
	Antigen Presentation Pathway	Interferon Signaling	PI3K/AKT Signaling	SAPK/JNK Signaling	TGF-β Signaling	Wnt/β-catenin Signaling	HIPPO signaling
IPA -LOG10(p-value)	13.9	11	1.03	0.74	0.604	0.503	0
	TRAF3 KO1 vs TRAF3/p100 double KO
	Interferon Signaling	Antigen Presentation Pathway
IPA -LOG10(p-value)	11.1	9.28

## Sheet: Figure_5C-H
Antigen presentation Log2(TPM)								Interferon pathway Log2(TPM)								Chemokines and growth factors
	NT R1	NT R2	Traf3 KO R1	Traf3 KO R2	Traf3/p100 dKO R1	Traf3/100 dKO R2			NT R1	NT R2	Traf3 KO R1	Traf3 KO R2	Traf3/p100 dKO R1	Traf3/100 dKO R2			NT R1	NT R2	Traf3 KO R1	Traf3 KO R2	Traf3/p100 dKO R1	Traf3/100 dKO R2
H2-M2	-6.64386	-1.39172	3.3985	4.44386	4.60142	5.33668		Oas1a	-3.84092	-1.67308	4.90123	4.45406	-0.12139	-0.3562		Wnt1	-5.17611	-6.64386	-0.84254	-0.70478	-2.59407	-0.44345
H2-Oa	-6.64386	-2.20212	4.859	5.12625	4.03862	4.17816		Cxcl10	-2.2085	-0.2922	6.58388	7.06549	3.57517	4.1783		Tdgf1	-4.31703	-5.47111	0.268083	-1.0572	0.825723	1.02568
H2-Eb1	-4.77115	-3.92523	2.15879	3.72053	4.01644	4.12721		Ifit3	2.38935	2.67857	8.86753	8.46766	3.67007	3.77195		Cxcl11	-4.26512	-5.00416	3.6049	4.09404	1.57995	1.442
Nlrc5	-0.44766	0.12886	4.21401	4.19087	2.74344	2.76049		Irf9	2.6757	2.73144	6.03731	5.49825	3.41398	3.41731		Ccl9	-3.92924	-2.66829	2.00448	3.24253	3.40411	4.73539
Cd74	0.616213	0.665661	7.73285	7.82808	7.75859	7.87433		Socs1	2.69852	2.92256	4.40561	4.90197	4.00073	4.12425		Cxcl10	-2.2085	-0.2922	6.58388	7.06549	3.57517	4.1783
H2-Bl	1.05706	1.19249	3.69258	3.18444	2.7911	2.01572		Irf7	2.70069	3.06359	7.7372	7.18133	3.89282	3.59289		Ccl17	1.84116	1.68707	3.26046	3.75995	4.03538	3.78531
H2-Q10	1.78059	1.54077	4.75611	4.10607	3.61172	3.66816		Stat2	3.32944	3.48347	6.07344	5.74587	3.41155	3.64344		Ccl5	2.81703	3.61142	9.04142	10.3977	9.49484	9.54735
H2-Q5	2.03072	2.53715	6.43669	5.96495	4.57026	4.66978		Tap1	3.5366	4.00483	6.97407	6.98944	5.37705	5.23578		Tgfb2	3.97125	3.80196	6.25706	6.16969	5.37625	6.0226
Psmb9	2.90654	3.38337	6.24677	6.42424	5.36279	5.14564		Ifit1	3.61275	3.91331	8.42712	7.91916	4.32751	4.56696		Pdgfb	6.51226	6.22098	7.62812	7.89935	7.24399	7.45778
H2-T10	3.40699	3.38369	5.24598	5.07073	4.41141	3.98351		Isg15	3.97436	4.32278	8.90673	8.40612	5.3539	5.24668		Adhesion molecules Log2(TPM)
Tap1	3.5366	4.00483	6.97407	6.98944	5.37705	5.23578		Stat1	4.04453	4.23184	7.35889	7.27625	4.86711	5.01551			NT R1	NT R2	Traf3 KO R1	Traf3 KO R2	Traf3/p100 dKO R1	Traf3/100 dKO R2
H2-Q1	4.06542	4.00043	6.75266	6.16969	5.25709	5.25615		Ifngr2	4.59557	5.44307	6.51925	6.90549	6.79156	6.87901		Icam1	-1.02042	0.899497	6.00718	6.2627	6.2	6.76569
H2-Q2	4.37701	4.59546	7.39323	6.71544	5.99911	5.99371		Jak2	5.28515	5.01421	6.99125	7.38309	6.88641	7.17891		Vcam1	-1.75414	-1.30251	5.84003	6.63751	5.97746	5.96857
H2-Q7	4.3911	4.38253	8.04295	7.51723	6.47612	6.48608		Ifi35	5.31317	5.04323	7.03051	6.72767	5.68335	5.80702
H2-M3	4.7394	5.01204	6.27383	6.15767	5.83759	5.86244		Ifngr1	5.47178	5.68879	7.82769	7.42399	7.08169	7.39862		NADPH-oxidase Log2(TPM)
H2-Q6	5.15442	5.20158	8.75544	8.26629	7.09747	7.15965		Psmb8	5.94937	6.22497	8.39712	8.25683	7.57347	7.48383			NT R1	NT R2	Traf3 KO R1	Traf3 KO R2	Traf3/p100 dKO R1	Traf3/100 dKO R2
H2-T22	5.73635	5.97445	8.02068	7.83346	6.81602	6.64227		Ifitm3	9.50214	9.67741	10.9205	10.8335	10.4978	9.98165		Ncf2	-2.05374	-5.90826	0.23147	0.345185	-0.49407	0.730549
Psmb8	5.94937	6.22497	8.39712	8.25683	7.57347	7.48383										Ncf4	-4.47628	2.13782	5.36282	6.90031	6.94622	6.67379
Tap2	5.95025	6.15163	7.84252	7.9493	7.1102	7.20853		Foreign DNA and RNA sensing molecules								Rac2	-3.97506	-3.12915	5.7579	6.97569	6.65573	6.75324
H2-Q4	7.02527	7.23674	9.69197	9.25518	8.23136	8.41318			NT R1	NT R2	Traf3 KO R1	Traf3 KO R2	Traf3/p100 dKO R1	Traf3/100 dKO R2		Ncf1	0.175355	2.01445	4.19282	5.63426	4.66174	5.16458
H2-T23	7.9287	7.95096	9.50918	9.02374	8.38423	8.28397		Dhx58	-0.24239	0.81925	6.10989	5.79759	2.86442	2.32156
H2-K1	8.20005	8.23633	11.0849	10.6077	9.71235	9.73347		Ifih1	1.12989	1.42221	4.61116	4.35082	2.56169	2.69554
Tapbp	8.5211	8.60469	9.86918	9.66063	9.13746	9.24485		Zbp1	2.97675	3.42424	7.8139	7.44859	5.60914	5.72891
H2-D1	8.67887	8.74332	11.3562	10.8821	10.0045	9.91976		Adar	4.48727	4.64065	6.40076	6.04409	4.8256	5.13391
B2M	8.72768	8.91255	11.4512	11.175	10.4324	10.2738		Trim25	5.50145	5.65767	6.89294	6.89413	6.01498	6.09551
