# Supplementary material for: Genome-wide CRISPR screen identifies noncanonical NF-κB signaling as a regulator of density-dependent proliferation
Source: eLife. 2020 Nov 13;9:e63603. doi: 10.7554/eLife.63603 (PMC7685705; doi:10.7554/eLife.63603)
Supplement: Figure 7—figure supplement 1—source data 1. [file elife-63603-fig7-figsupp1-data1.xlsx]

## Sheet: F7-FS1-B
	Proliferation of NT cells in mixture with NT ot TRAF3 KO1
	NT+NT	NT+TRAF3 KO1
Repeat 1 Field of view 1	1.82371	1.18265
Repeat 1 Field of view 2	0.268456	0.116959
Repeat 1 Field of view 3	1.44694	0.13245
Repeat 1 Field of view 4	1.67064	0.44843
Repeat 1 Field of view 5	1.4742	0.678733
Repeat 2 Field of view 1	0.164813	2.59489
Repeat 2 Field of view 2	0	2.30435
Repeat 2 Field of view 3	1.87578	1.25
Repeat 2 Field of view 4	0.256739	1.09938
Repeat 2 Field of view 5	0.121457	3.39726
Repeat 3 Field of view 1	0	0.337838
Repeat 3 Field of view 2	0	0.728597
Repeat 3 Field of view 3	0.753012	0.395778
Repeat 3 Field of view 4	0.364964	0.156986
Repeat 3 Field of view 5	0	0.475436
