# Supplementary material for: Genome-wide CRISPR screen identifies noncanonical NF-κB signaling as a regulator of density-dependent proliferation
Source: eLife. 2020 Nov 13;9:e63603. doi: 10.7554/eLife.63603 (PMC7685705; doi:10.7554/eLife.63603)
Supplement: Figure 7—figure supplement 2—source data 1. [file elife-63603-fig7-figsupp2-data1.xlsx]

## Sheet: Sheet1
	p21
	NT low density	NT	Traf3 KO1	NT p100 KO	Traf3 KO1 p100 KO
Repeat1	0.20276	1	1.04108	0.75857	1.07746
Repeat2	0.560669	1	1.06994	1.03978	0.472257
Repeat3	0.295355	1	1.1279	1.13739	2.06017
Repeat4	0.243769	1	0.545851	0.848573	0.93089
	p27
	NT low density	NT	Traf3 KO1	NT p100 KO	Traf3 KO1 p100 KO
Repeat1	0.83017	1	1.53896	1.48052	1.95573
Repeat2	1.45852	1	1.31604	1.49668	1.01542
Repeat3	0.595248	1	0.595705	1.10114	0.859374
Repeat4	0.756167	1	0.728625	1.11933	0.532647
	p18
	NT low density	NT	Traf3 KO1	NT p100 KO	Traf3 KO1 p100 KO
Repeat1	0.762616	1	1.70945	1.41247	1.22568
Repeat2	1.25145	1	1.54925	0.956648	1.25567
Repeat3	0.497817	1	1.3543	0.802034	1.0578
Repeat4	0.836444	1	0.850516	0.738604	1.32743
	p19
	NT low density	NT	Traf3 KO1	NT p100 KO	Traf3 KO1 p100 KO
Repeat1	0.735241	1	0.84506	0.44717	2.07637
Repeat2	0.930302	1	0.706968	1.29406	0.604877
Repeat3	0.741473	1	0.481759	0.487278	0.621999
