# Supplementary material for: Genome-wide CRISPR screen identifies noncanonical NF-κB signaling as a regulator of density-dependent proliferation
Source: eLife. 2020 Nov 13;9:e63603. doi: 10.7554/eLife.63603 (PMC7685705; doi:10.7554/eLife.63603)
Supplement: Figure 7—source data 1. [file elife-63603-fig7-data1.xlsx]

## Sheet: Figure_7B
	NT	NF2 KO1	TRAF3 KO1
Repeat 1 Field of view 1	1.12434	1.29485	0.857606
Repeat 1 Field of view 2	0.991591	1.47489	1.28576
Repeat 1 Field of view 3	0.886261	1.61414	1.01269
Repeat 1 Field of view 4	1.08853	1.1826	1.69411
Repeat 1 Field of view 5	0.94679	1.29431	1.06197
Repeat 1 Field of view 6	1.08981	1.60422	0.889882
Repeat 1 Field of view 7	0.965621	1.44029	1.44253
Repeat 1 Field of view 8	0.896129	1.47835	1.04406
Repeat 2 Field of view 1	1.07298	1.73112	0.788258
Repeat 2 Field of view 2	1.10988	1.85389	0.733604
Repeat 2 Field of view 3	1.03036	1.97103	0.585427
Repeat 2 Field of view 4	0.928662	1.47374	0.715122
Repeat 2 Field of view 5	0.913612	1.65344	0.849837
Repeat 2 Field of view 6	0.967886		0.899982
Repeat 3 Field of view 1	1.03735	2.09539	0.958917
Repeat 3 Field of view 2	0.985624	1.89561	0.737348
Repeat 3 Field of view 3	1.01707	2.0654	0.867849
Repeat 3 Field of view 4	0.988315	2.28262	0.912026
Repeat 3 Field of view 5	1.07278	1.68423	0.769874
Repeat 3 Field of view 6	1.08341	1.78815	1.02596

## Sheet: Figure_7C
	mRNA level relative to control
Dusp1	-4.53
Gas6	-3.65
Tns1	-3.35
Cavin2	-2.42
Fgf2	-2.09
Ankrd1	-1.88
Ccn2	-1.79
Etv5	-1.77
Tgm2	-1.55
Ndrg1	-1.5
Pdlim2	-1.47
Agfg2	-1.46
Ggh	-1.44
Itgb5	-1.44
Amotl2	-1.43
Dlc1	-1.41
Ccn1	-1.38
Gls	-1.38
Lhfp	-1.38
Pmp22	-1.34
Dab2	-1.32
Slit2	-1.27
Bicc1	-1.25
Fscn1	-1.17
Thbs1	-1.17
Stmn1	-1.16
Cdkn2c	-1.14
Phgdh	-1.1
Cdc20	-1.09
Crim1	-1.09
Col4a3	-1.05
Itgb2	-1.05
Hexb	-1.04
Axl	-1.01
Tspan3	1
Ddah1	1.05
Asap1	1.06
Dut	1.09
Gadd45b	1.22
Flna	1.26
Ect2	1.33
Birc5	1.37
Marcks	1.42
Serpine1	1.45
Shcbp1	1.5
Emp2	1.55
Hmmr	1.61
Tk1	1.67
Top2a	1.68
Mdfic	1.73
Schip1	1.88
Cenpf	1.92
Sgk1	2.1
Tnnt2	2.3
Sh2d4a	3.11
Tgfb2	3.68
Fstl1	15.32
