# Supplementary material for: Genome-wide CRISPR screen identifies noncanonical NF-κB signaling as a regulator of density-dependent proliferation
Source: eLife. 2020 Nov 13;9:e63603. doi: 10.7554/eLife.63603 (PMC7685705; doi:10.7554/eLife.63603)
Supplement: Figure 8—source data 1. [file elife-63603-fig8-data1.xlsx]

## Sheet: Figure_8B
	NT	Traf3 KO1
Repeat 1 Field of view 1	26.3158	26.8362
Repeat 1 Field of view 2	17.0088	32.626
Repeat 1 Field of view 3	26.6904	29.602
Repeat 1 Field of view 4	17.7083	25.2475
Repeat 1 Field of view 5	14.7541	35.1351
Repeat 2 Field of view 1	10.4615	23.3333
Repeat 2 Field of view 2	15.4574	33.6032
Repeat 2 Field of view 3	19.4444	33.4532
Repeat 2 Field of view 4	16.9611	21.4286
Repeat 2 Field of view 5	14.3345	24.9027
Repeat 3 Field of view 1	4.89511	26.087
Repeat 3 Field of view 2	3.16456	19.4631
Repeat 3 Field of view 3	6.06061	21.3457
Repeat 3 Field of view 4	4.03727	19.8413
Repeat 3 Field of view 5	4.44444	32.7511

## Sheet: Figure_8C
	NT	NT 0% serum	TRAF3 KO1	TRAF3 KO1 0% serum
Repeat 1	42.8	30.8	51.4	44.5
Repeat 2	45	14.9	44.6	38
Repeat 3	45.9	13.4	62.2	30.3
Repeat 4	50.6	33.8	47	46.9
Repeat 5	49.2	30.9	60	47.3
Repeat 6	42.1	18.1	40.8	33

## Sheet: Figure_8F
	NT	TRAF3 KO1
Repeat 1 Field of view 1	4.49438	2.92398
Repeat 1 Field of view 2	0	2.43902
Repeat 1 Field of view 3	0	8.13954
Repeat 1 Field of view 4	0	4.70588
Repeat 1 Field of view 5	0	5.46448
Repeat 1 Field of view 6	0	0.537634
Repeat 2 Field of view 1	0	7.63889
Repeat 2 Field of view 2	0	10.687
Repeat 2 Field of view 3	1.21951	9.09091
Repeat 2 Field of view 4	0	20.3252
Repeat 2 Field of view 5	0	4.28571
Repeat 2 Field of view 6	0	10.7692
Repeat 3 Field of view 1	0	28.1482
Repeat 3 Field of view 2	0	15.6863
Repeat 3 Field of view 3	0	20.7207
Repeat 3 Field of view 4	0.704225	20
Repeat 3 Field of view 5	0	9.80392
Repeat 3 Field of view 6	0	7.79221
Repeat 4 Field of view 1	0	15.1351
Repeat 4 Field of view 2	0	14.0541
Repeat 4 Field of view 3	0	31.2925
Repeat 4 Field of view 4	0	38.9262
Repeat 4 Field of view 5	0.010309	10.4972
Repeat 4 Field of view 6	0	21.7391

## Sheet: Figure_8G
	NT	TRAF3 KO1
Repeat 1 Field of view 1	8.98876	4.67836
Repeat 1 Field of view 2	0	2.43902
Repeat 1 Field of view 3	0	8.72093
Repeat 1 Field of view 4	0	6.47059
Repeat 1 Field of view 5	0	5.46448
Repeat 1 Field of view 6	0	0.537634
Repeat 2 Field of view 1	0	8.33333
Repeat 2 Field of view 2	0	10.687
Repeat 2 Field of view 3	1.21951	9.09091
Repeat 2 Field of view 4	1.20482	21.1382
Repeat 2 Field of view 5	0	4.28571
Repeat 2 Field of view 6	0	10.7692
Repeat 3 Field of view 1	0	29.6296
Repeat 3 Field of view 2	0	16.3399
Repeat 3 Field of view 3	0	23.4234
Repeat 3 Field of view 4	0.704225	20.8696
Repeat 3 Field of view 5	0	9.80392
Repeat 3 Field of view 6	0	9.09091
Repeat 4 Field of view 1	0	15.1351
Repeat 4 Field of view 2	0	14.0541
Repeat 4 Field of view 3	0	31.2925
Repeat 4 Field of view 4	0	38.9262
Repeat 4 Field of view 5	1.03093	10.4972
Repeat 4 Field of view 6	0	21.7391
